# Supplementary material
Source: PubMed Central journal article supplement (PMC10347421)
Supplement: NIHMS1899961-supplement-All_supplementary_materials_combined.pdf [file NIHMS1899961-supplement-All_supplementary_materials_combined.pdf]

## List of Supplementary Materials

### 1. Supplementary acknowledgements:

- a. ERCB
- b. NEPTUNE
- c. H3 Africa

### 2. Supplementary Methods

### 3. Supplementary References

### 4. Supplementary Figures:

- a. Supplementary Figure S1. Cluster dendrogram and assignment of minimal change disease (MCD) and focal segmental glomerulosclerosis (FSGS) participants based on kidney biopsy tubulointerstitial gene expression data in North American Nephrotic Syndrome Study Network (NEPTUNE), European Renal cDNA Bank (ERCB), and Human Heredity and Health in Africa Kidney Disease Research Network cohort (H3 Africa).
- b. Supplementary Figure S2. Comparison of cluster assignment and clinical measures in NEPTUNE and ERCB using glomerular compartment expression data
- c. Supplementary Figure S3. Comparison of clinical factors and cluster assignment across cohorts
- d. Supplementary Figure S4. Urine marker levels by diagnosis and cluster

5. Supplementary Tables:

- a. Supplementary Table S1a. List of differentially expressed genes in Cluster 3 versus Clusters 1 and 2.
- b. Supplementary Table S1b. Predicted Upstream Regulators based on DEG profiles of patients in cluster 3 relative to clusters 1 and 2.
- c. Supplementary Table S2. Genes and gene products activated by TNF used to generate the TNF activation score.
- d. Supplementary Table S3. Clinical characteristics of North American Nephrotic Syndrome Study Network (NEPTUNE) participants with biopsies used for single-nucleus RNA-seq.

**ERCB members at the time of the study:** Clemens David Cohen, Holger Schmid, Michael Fischereeder, Lutz Weber, Matthias Kretzler, Detlef Schlöndorff, Munich/Zurich/AnnArbor/New York; Jean Daniel. Sraer, Pierre Ronco, Paris; Maria Pia Rastaldi, Giuseppe D'Amico, Milano; Peter Doran, Hugh Brady, Dublin; Detlev Mönks, Christoph Wanner, Würzburg; Andrew Rees, Aberdeen and Vienna; Frank Strutz, Gerhard Anton Müller, Göttingen; Peter Mertens, Jürgen Floege, Aachen; Norbert Braun, Teut Risler, Tübingen; Loreto Gesualdo, Francesco Paolo Schena, Bari; Gunter Wolf, Jena; Rainer Oberbauer, Donscho Kerjaschki, Vienna; Bernhard Banas, Bernhard Krämer, Regensburg; Moin Saleem, Bristol; Rudolf Wüthrich, Zurich; Walter Samtleben, Munich; Harm Peters, Hans-Hellmut Neumayer, Berlin; Mohamed Daha, Leiden; Katrin Ivens, Bernd Grabensee, Düsseldorf; Francisco Mampaso(†), Madrid; Jun Oh, Franz Schaefer, Martin Zeier, Hermann-Joseph Gröne, Heidelberg; Peter Gross, Dresden; Giancarlo Tonolo; Sassari; Vladimir Tesar, Prague; Harald Rupprecht, Bayreuth; Hermann Pavenstädt, Münster; Hans-Peter Marti, Bern; Peter Mertens, Magdeburg, Jens Gerth, Zwickau.

## Members of the Nephrotic Syndrome Study Network (NEPTUNE) at the time of the study

### NEPTUNE Enrolling Centers

*Case Western Reserve University, Cleveland, OH:* J Sedor\*, K Dell\*\*, M Schachere#, J Negrey  
*Children's Hospital, Los Angeles, CA:* K Lemley\*, L Whitted#  
*Children's Mercy Hospital, Kansas City, MO:* T Srivastava\*, C Haney#  
*Cohen Children's Hospital, New Hyde Park, NY:* C Sethna\*, K Grammatikopoulos#, R Odusayana  
*Columbia University, New York, NY:* G Appel\*, P Canetta\*\*, M Toledo#  
*Emory University, Atlanta, GA:* L Greenbaum\*, C Wang\*\*, B Lee#  
*Harbor-University of California Los Angeles Medical Center:* S Adler\*, C Nast\*‡, J La Page#  
*John H. Stroger Jr. Hospital of Cook County, Chicago, IL:* A Athavale\*  
*Johns Hopkins Medicine, Baltimore, MD:* M. Atkinson, A Neu\*, S Boynton#  
*Mayo Clinic, Rochester, MN:* F Fervenza\*, M Hogan\*\*, J Lieske\*, V Chernitskiy#  
*Montefiore Medical Center, Bronx, NY:* F Kaskel\*, N Kumar\*, P Flynn#  
*NIDDK Intramural, Bethesda MD:* J Kopp\*, E Castro-Rubio#, J Blake#  
*New York University Medical Center, New York, NY:* H Trachtman\*, O Zhdanova\*\*, F Modersitzki#, S Vento#  
*Stanford University, Stanford, CA:* R Lafayette\*, M O'Shaughnessy\*\*, K Mehta#  
*Temple University, Philadelphia, PA:* C Gadegbeku\*, D Johnstone\*\*, S Quinn-Boyle  
*University Health Network Toronto:* D Cattran\*, M Hladunewich\*\*, H Reich\*\*, P Ling#, M Romano#  
*University of Miami, Miami, FL:* A Fornoni\*, L Barisoni\*, C Bidot#  
*University of Michigan, Ann Arbor, MI:* M Kretzler\*, D Gipson\*, A Williams#, R Pitter#  
*University of North Carolina, Chapel Hill, NC:* V Derebail\*, K Gibson\*, S Grubbs#, A Froment#  
*University of Pennsylvania, Philadelphia, PA:* J Hogan\*\*, L Holzman\*, K Meyers\*\*, K Kallem#, A Swensen#  
*University of Texas Southwestern, Dallas, TX:* K Sambandam\*, E Brown\*\*, Z Wang#  
*University of Washington, Seattle, WA:* A Jefferson\*, S Hingorani\*\*, K Tuttle\*\*§, L Curtin#, S Dismuke#, A Cooper#§  
*Wake Forest University, Winston-Salem, NC:* B Freedman\*, JJ Lin\*\*, S Gray#  
*Data Analysis and Coordinating Center:* M Kretzler, L Barisoni, C Gadegbeku, B Gillespie, D Gipson, L Holzman, L Mariani, M Sampson, P Song, J Troost, J Zee, E Herreshoff, S Li, C Lienczewski, T Mainieri, M Wladkowski, A Williams, D Zinsser  
*National Institute of Diabetes and Digestive and Kidney Diseases (NIDDK) Program Office:* K Abbott, C Roy  
*The National Center for Advancing Translational Sciences (NCATS) Program Office:* T Urv, PJ Brooks

\*Principal Investigator; \*\*Co-investigator; #Study Coordinator

‡Cedars-Sinai Medical Center, Los Angeles, CA

§Providence Medical Research Center, Spokane, WA

## **Members of the Human Heredity and Health in Africa Kidney Disease Research Network cohort (H3Africa)**

Samuel Ajayi<sup>1</sup>, Yemi Raji<sup>1</sup>, Timothy Olanrewaju<sup>2</sup>, Charlotte Osafo<sup>3</sup>, Ifeoma Ulasi<sup>4</sup>, Adanze Asinobi<sup>1</sup>, Cheryl A. Winkler<sup>5</sup>, David Burke<sup>6</sup>, Fatiu Arogundade<sup>7</sup>, Ivy Ekem<sup>8</sup>, Jacob Plange-Rhule<sup>9\*\*</sup>, Manmak Mamven<sup>10</sup>, Michael Mate-kole<sup>3</sup>, Olukemi Amodu<sup>1</sup>, Richard Cooper<sup>11</sup>, Sampson Antwi<sup>9</sup>, Adebowale Adeyemo<sup>12</sup>, Titilayo Ilori<sup>13</sup>, Victoria Adabayeri<sup>3</sup>, Alexander Nyarko<sup>14</sup>, Anita Ghansah<sup>14</sup>, Ernestine Kubi Amos-Abanyie<sup>14</sup>, Priscilla Abena Akyaw<sup>14</sup>, Paul L. Kimmel<sup>15</sup>, Babatunde L. Salako<sup>1</sup>, Rulan S. Parekh<sup>16</sup>, Bamidele Tayo<sup>11</sup>, Rasheed Gbadegesin<sup>17</sup>, Michael Boehnke<sup>6</sup>, Robert Lyons<sup>6</sup>, Frank (Chip) Brosius<sup>6</sup>, Daniel Clauw<sup>6</sup>, Chijioko Adindu<sup>2</sup>, Clement Bewaji<sup>2</sup>, Elliot Koranteng Tannor<sup>9</sup>, Perditer Okyere<sup>9</sup>, Chuba Ijoma<sup>4</sup>, Nicki Tiffin<sup>18</sup>, Junaid Gamiedien<sup>18</sup>, Friedhelm Hildebrandt<sup>19</sup>, Charles Odenigbo<sup>20</sup>, Nonyelun Jisieike-Onuigbo<sup>20</sup>, Ifeoma Modebe<sup>20</sup>, Aliyu Abdu<sup>21</sup>, Patience Obiagwu<sup>21</sup>, Ogochukwu Okoye<sup>22</sup>, Adaobi Solarin<sup>23</sup>, Toyin Amira<sup>24</sup>, Christopher Esezobor<sup>24</sup>, Muhammad Makusidi<sup>25</sup>, Santosh Saraf<sup>26</sup>, Victor Gordeuk<sup>26</sup>, Gloria Ashuntangtang<sup>27</sup>, Georgette Guenkam<sup>27</sup>, Folefack Kazi<sup>27</sup>, Olanrewaju Adedoyin<sup>2</sup>, Mignon McCullough<sup>28</sup>, Peter Nourse<sup>28</sup>, Uche Okafor<sup>4</sup>, Emmanuel Anigilaje<sup>10</sup>, Patrick Ikpebe<sup>23</sup>, Tola Odetunde<sup>4</sup>, Ngozi Mbanefo<sup>4</sup>, Wasiu Olowu<sup>7</sup>, Paulina Tindana<sup>3</sup>, Olubenga Awobusuyi<sup>23</sup>, Olugbenga Ogedegbe<sup>29</sup>, Opeyemi Olabisi<sup>30</sup>, Karl Skorecki<sup>31</sup>, Ademola Adebowale<sup>1</sup>, Matthias Kretzler<sup>6</sup>, Jeffrey Hodgin<sup>6</sup>, Dwomoa Adu<sup>3</sup>, Akinlolu Ojo<sup>32</sup>, Vincent Boima<sup>3</sup>

### **Affiliated Institutions**

1. Department of Medicine, Pediatrics and Institute of Child Health, University of Ibadan, Ibadan, Nigeria
2. University of Ilorin, Ilorin, Nigeria
3. University of Ghana Medical School, Accra, Ghana
4. University of Nigeria, Enugu State, Nigeria
5. Basic Research Laboratory, Frederick National Laboratory for Cancer Research, National Cancer Institute, Frederick, MD, USA
6. Departments of Human Genetics, Internal Medicine and Pathology, University of Michigan, Ann Arbor, MI, USA
7. Obafemi Awolowo University, Ile- Ife, Nigeria
8. University of Cape Coast, Cape Coast, Ghana
9. Kwame Nkrumah University of Science and Technology, Kumasi, Ghana
10. University of Abuja, Abuja, Nigeria
11. Parkinson School of Health Sciences and Public Health, Loyola University, Chicago, IL, USA
12. Centre for Research on Genomics and Global Health, National Human Genome Research Institute, National Institutes of Health, Bethesda, MD, USA
13. Division of Nephrology, Boston Medical Center, Boston University School of Medicine, Boston, MA, USA
14. Noguchi Memorial Institute for Medical Research, University of Ghana, Ghana
15. National Institute of Diabetes and Digestive and Kidney Disease, Bethesda, MD, USA
16. Department of Pediatrics, University of Toronto, Toronto, Canada.
17. Department of Pediatrics, Duke University Medical Center, Durham, NC, USA
18. University of Western Cape, Cape Town, South Africa
19. Harvard Medical School, Harvard University, Boston, MA, USA
20. Nnamdi Azikiwe University Teaching Hospital, Nnewi, Nigeria
21. Aminu Kano Teaching Hospital, Kano, Nigeria
22. Delta State University Teaching Hospital, Warri, Nigeria
23. Lagos State University Teaching Hospital, Lagos, Nigeria
24. Lagos University Teaching Hospital, University of Lagos, College of Medicine, Lagos, Nigeria
25. Usmanu Danfodiyo University Teaching Hospital, Sokoto, Nigeria
26. University of Illinois at Chicago, Chicago IL, USA
27. University of Yaoundé, Yaoundé, Cameroon
28. University of Cape Town, Cape Town, South Africa
29. New York University, New York City, NY, USA
30. Duke University, Durham, NC, USA
31. Technion-Israel Institute of Technology, Haifa, Israel
32. University of Kansas School of Medicine, Kansas City, KS, USA

\*\*Deceased

## Supplementary Methods

### *Consensus Clustering:*

Consensus clustering was used to identify the number of clusters (k) in the data and to select the most reliable clusters. This process involves several runs (n) of a clustering algorithm such as kmeans, PAM, HCL on the transcriptomic data. A pairwise consensus value is computed, defined as the proportion of clustering runs in which two samples clustered together, where 1 is assigned if two samples clustered together along all n runs and 0 if they did not cluster together. Samples are clustered in the same k cluster if they show high consensus values along n iterations. Three metrics were used to compare the performance of the above clustering algorithms: delta-K, consensus matrix, and the membership robustness matrix. Delta-k plots the consensus distributions for each k, called the cumulative distribution function (CDF). When this distribution reaches the maximum it indicates the maximum stability, and suggested k as a number of clusters in the dataset. Consensus matrix shows the consensus values between samples. These values should be 1 for samples clustered together and shown as a clear cluster. The membership robustness matrix shows the proportion of n runs that the samples were assigned into k cluster. We used clusterCons R package version 1.0 for the consensus clustering approach. R code as follows:

```
library(clusterCons)

#RNA_SEQ_DATA has genes in row and samples in columns
cmr_TI <- cluscomp(data.frame(t(RNA_seq_data)),
                  algorithms=list('kmeans','pam','hclust'),
                  merge=1,clmin=2,clmax=10, reps=1000)

cmr=cmr_TI
ac <- aucs(cmr)
#plot out the auc curves
#aucplot(ac)
#now lets calculate the deltak
```

```
dk <- deltax(ac)
#plot out the results to find optimal class number
dkplot1(dk)
```

### *Transcriptomic Profiling:*

In NEPTUNE, the research core obtained at the time of a clinically-indicated biopsy was placed in RNA preservative (RNAlater). Genome wide transcriptome analysis was performed on manually micro-dissected kidney biopsy tissue that separated the tubulointerstitial compartment from the glomerular compartment. For RNA-sequencing (RNA-seq) profiles, mRNA samples

were prepared using the Illumina TruSeq mRNA Sample Prep v2 kit. Multiplex amplification was used to prepare cDNA with a paired-end read length of 100 bases using an Illumina HiSeq2000. RNAseq was performed by the University of Michigan Advanced Genomics Core (<https://brcf.medicine.umich.edu/cores/advanced-genomics/>). Quality of the sequencing data was assessed using the FastQC tool (<http://www.bioinformatics.babraham.ac.uk/projects/fastqc/>).

Read counts were extracted from the fastq files using HTSeq (version 0.11). RNA-seq profiles from different batches were voom-transformed and batch corrected using ComBat<sup>s1</sup>.

For ERCB biopsy samples, total RNA was isolated, reverse transcribed, linearly amplified and hybridized on the Affymetrix microarray platforms<sup>s2-s6</sup>. Microarrays were preprocessed and normalized with RMA<sup>s7</sup> following the workflow described by Lockstone et al.<sup>s8</sup> Human microarrays were annotated using custom chip definition files from the University of Michigan (Brainarray), custom chip definition file version 19<sup>s9, s10</sup>. Normalized gene expression data was batch corrected using ComBat<sup>s11</sup>. Transcriptional profiles of biopsies from patients with MCD and FSGS in the ERCB have been deposited to GEO and are part of

accession numbers GSE104954 (tubulointerstitium) and GSE104948 (glomeruli).

For H3 Africa biopsy samples, a 5 mm cortical segment of a kidney biopsy core (beyond that necessary for clinical diagnosis) was placed into an RNA preservative (RNAlater).

Manual microdissection was used to separate the tissue into glomeruli and tubulointerstitial compartments and were processed for RNA expression profiles as in the NEPTUNE study.

#### *Urine Biomarker Profiling – Luminex Profiling*

All urine analyte levels were measured in duplicate and normalized to urine creatinine concentration. Extensive quality control thresholds were required for inclusion in the analysis.

Briefly, based on manual review of all analyte distributions, data with technical errors (e.g., low bead count, high inter-well variability) were discarded. Data were flagged if they were extrapolated (outside of the standard curve) or out of range (above or below the 4-5 dilution logistic standard curve). A coefficient of variation was calculated for each analyte aggregated by sample. Analytes were excluded if >50% of measures were extrapolated or out of range or there was a high coefficient of variation.

#### *Single nuclear RNA-seq data processing*

Analyses were performed on the output data files from CellRanger using the Seurat R package (version 4.1.1 ; <https://cran.r-project.org/web/packages/Seurat/index.html>), the SoupX R package<sup>s12</sup>, and the DoubletFinder R package<sup>s13</sup>. To limit low quality nuclei and/or multiplets, we set minimum and maximum cutoffs for gene counts



pernuclei to 500 and 5000 genes, respectively and limited the analysis to nuclei with a mitochondrial gene content less than 10%. Nuclei were merged into a Seurat object using integrate function for downstream analyses. Data submitted to GEO. R code used as follows:

```
#These packages are necessary to run the base Seurat pipeline
library(dplyr)
library(Seurat)
library(SeuratObject)
library(patchwork)
library(umap)
#As these were all run in cellranger v6, there is no need to adjust the base SoupX code.
If anyone reprocesses this in cellranger v7 or higher, please check the SoupX github
page, as there is a change to the package code that is needed to make SoupX work.
library(SoupX)
#These packages are needed to run DoubletFinder; some of these need to be installed via
github
library(fields)
library(Matrix)
library(KernSmooth)
library(ROCR)
library(parallel)
library(DoubletFinder)
#TNF High
#1134-EO-2 sample
sc=load10X("/nfs/turbo/umms-kretzler-covid19/NovaA-240/1134-EO/NovaA-
240/Sample_1134-EO-2/outs")
sc=autoEstCont(sc)
out=adjustCounts(sc)
Patient11342 <- CreateSeuratObject(out)
Patient11342$TNF <- "TNFHigh"
Patient11342$ID <- "Patient11342"
Patient11342$NS <- "FSGS"
Patient11342[["percent.mt"]] <- PercentageFeatureSet(Patient11342, pattern="^MT-")
Patient11342 <- subset(Patient11342, subset = nFeature_RNA > 500 & nFeature_RNA
<5000 & percent.mt <10)
Patient11342 <- NormalizeData(Patient11342,
normalization.method="LogNormalize",scale.factor = 10000)
Patient11342 <- FindVariableFeatures(Patient11342, selection.method="vst",nfeatures=
2000)
Patient11342 <- ScaleData(Patient11342)
Patient11342 <- RunPCA(Patient11342, features = VariableFeatures(object =
Patient11342))
```

```

Patient11342 <- FindNeighbors(Patient11342, dims = 1:30)
Patient11342 <- FindClusters(Patient11342, resolution = 0.6)
Patient11342 <- RunUMAP(Patient11342, dims = 1:30)
#The above is needed to run the data to a point where DoubletFinder can take over. the
remaining steps for this sample identify doublets and then I remove them with the subset
command below. I also clean up the resulting matrix with the last two lines in this
sample. To save on space, I won't repeat this particular comment, but just kinda use this
template down below.
sweep.res.list_Patient11342 <- paramSweep_v3(Patient11342, PCs = 1:10, sct=FALSE)
sweep.stats_Patient11342 <- summarizeSweep(sweep.res.list_Patient11342, GT =
FALSE)
bcmvn_Patient11342 <- find.pK(sweep.stats_Patient11342)
pK_Patient11342 <- bcmvn_Patient11342 %>% filter(BCmetric == max(BCmetric))
%>% select(pK)
pK_Patient11342 <- as.numeric(as.character(pK_Patient11342[[1]]))
annotations_Patient11342 <- Patient11342@meta.data$seurat_clusters
homotypic.prop_Patient11342 <- modelHomotypic(annotations_Patient11342)
nExp_poi_Patient11342 <- round(0.075*nrow(Patient11342@meta.data))
nExp_poi_adj_Patient11342 <- round(nExp_poi_Patient11342*(1-
homotypic.prop_Patient11342))
Patient11342 <- doubletFinder_v3(Patient11342, PCs = 1:10, pN = 0.25, pK =
pK_Patient11342, nExp = nExp_poi_adj_Patient11342, reuse.pANN = FALSE, sct =
FALSE)
#I ran table(Patient11342@meta.data$DF.classifications_0.25_0.005_684) to determine
the number of possible doublets that were identified.
Patient11342 <- subset(x=Patient11342, subset = DF.classifications_0.25_0.005_684 ==
"Singlet")
Patient11342$DF.classifications_0.25_0.005_684 <- NULL
Patient11342$pANN_0.25_0.005_684 <- NULL
#Rinse and repeat for the remaining samples.
#1144-EO-3 sample
sc1=load10X("/nfs/turbo/umms-kretzler-covid19/NovaA-246/1144-EO/NovaA-
246/Sample_1144-EO-3/outs")
sc1=autoEstCont(sc1)
out1=adjustCounts(sc1)
Patient11443 <- CreateSeuratObject(out1)
Patient11443$TNF <- "TNFHigh"
Patient11443$ID <- "Patient11443"
Patient11443$NS <- "FSGS"
Patient11443[["percent.mt"]] <- PercentageFeatureSet(Patient11443, pattern="^MT-")
Patient11443 <- subset(Patient11443, subset = nFeature_RNA > 500 & nFeature_RNA
<5000 & percent.mt <10)
Patient11443<- NormalizeData(Patient11443,
normalization.method="LogNormalize",scale.factor = 10000)
Patient11443 <- FindVariableFeatures(Patient11443, selection.method="vst",nfeatures=
2000)

```

```

Patient11443 <- ScaleData(Patient11443)
Patient11443 <- RunPCA(Patient11443, features = VariableFeatures(object =
Patient11443))
Patient11443 <- FindNeighbors(Patient11443, dims = 1:30)
Patient11443 <- FindClusters(Patient11443, resolution = 0.6)
Patient11443 <- RunUMAP(Patient11443, dims = 1:30)
sweep.res.list_Patient11443 <- paramSweep_v3(Patient11443, PCs = 1:10, sct=FALSE)
sweep.stats_Patient11443 <- summarizeSweep(sweep.res.list_Patient11443, GT =
FALSE)
bcmvn_Patient11443 <- find.pK(sweep.stats_Patient11443)
pK_Patient11443 <- bcmvn_Patient11443 %>% filter(BCmetric == max(BCmetric))
%>% select(pK)
pK_Patient11443 <- as.numeric(as.character(pK_Patient11443[[1]]))
annotations_Patient11443 <- Patient11443@meta.data$seurat_clusters
homotypic.prop_Patient11443 <- modelHomotypic(annotations_Patient11443)
nExp_poi_Patient11443 <- round(0.075*nrow(Patient11443@meta.data))
nExp_poi_adj_Patient11443 <- round(nExp_poi_Patient11443*(1-
homotypic.prop_Patient11443))
Patient11443 <- doubletFinder_v3(Patient11443, PCs = 1:10, pN = 0.25, pK =
pK_Patient11443, nExp = nExp_poi_adj_Patient11443, reuse.pANN = FALSE, sct =
FALSE)
Patient11443 <- subset(x=Patient11443, subset = DF.classifications_0.25_0.06_106 ==
"Singlet")
Patient11443$DF.classifications_0.25_0.06_106 <- NULL
Patient11443$pANN_0.25_0.06_106 <- NULL
#1134-EO-4 sample
sc2=load10X("/nfs/turbo/umms-kretzler-covid19/NovaA-240/1134-EO/NovaA-
240/Sample_1134-EO-4/outs")
sc2=autoEstCont(sc2,forceAccept=TRUE)
out2=adjustCounts(sc2)
Patient11344 <- CreateSeuratObject(out2)
Patient11344$TNF <- "TNFHigh"
Patient11344$ID <- "Patient11344"
Patient11344$NS <- "FSGS"
Patient11344[["percent.mt"]] <- PercentageFeatureSet(Patient11344, pattern="^MT-")
Patient11344 <- subset(Patient11344, subset = nFeature_RNA > 500 & nFeature_RNA
<5000 & percent.mt <10)
Patient11344 <- NormalizeData(Patient11344,
normalization.method="LogNormalize",scale.factor = 10000)
Patient11344 <- FindVariableFeatures(Patient11344, selection.method="vst",nfeatures=
2000)
Patient11344 <- ScaleData(Patient11344)
Patient11344 <- RunPCA(Patient11344, features = VariableFeatures(object =
Patient11344))
Patient11344 <- FindNeighbors(Patient11344, dims = 1:30)
Patient11344 <- FindClusters(Patient11344, resolution = 0.6)

```

```

Patient11344 <- RunUMAP(Patient11344, dims = 1:30)
sweep.res.list_Patient11344 <- paramSweep_v3(Patient11344, PCs = 1:10, sct=FALSE)
sweep.stats_Patient11344 <- summarizeSweep(sweep.res.list_Patient11344, GT =
FALSE)
bcmvn_Patient11344 <- find.pK(sweep.stats_Patient11344)
pK_Patient11344 <- bcmvn_Patient11344 %>% filter(BCmetric == max(BCmetric))
%>% select(pK)
pK_Patient11344 <- as.numeric(as.character(pK_Patient11344[[1]]))
annotations_Patient11344 <- Patient11344@meta.data$seurat_clusters
homotypic.prop_Patient11344 <- modelHomotypic(annotations_Patient11344)
nExp_poi_Patient11344 <- round(0.075*nrow(Patient11344@meta.data))
nExp_poi_adj_Patient11344 <- round(nExp_poi_Patient11344*(1-
homotypic.prop_Patient11344))
Patient11344 <- doubletFinder_v3(Patient11344, PCs = 1:10, pN = 0.25, pK =
pK_Patient11344, nExp = nExp_poi_adj_Patient11344, reuse.pANN = FALSE, sct =
FALSE)
#Need to change the column name, as minus sign is messing up subsetting function
colnames(Patient11344@meta.data) <-
c("orig.ident", "nCount_RNA", "nFeature_RNA", "TNF", "ID", "NS", "percent.mt", "RNA_s
nn_res.0.6", "seurat_clusters", "pANN_0.25_5eNeg04_1395", "DF.classifications_0.25_5e
Neg04_1395")
Patient11344 <- subset(x=Patient11344, subset =
DF.classifications_0.25_5eNeg04_1395 == "Singlet")
Patient11344$DF.classifications_0.25_5eNeg04_1395 <- NULL
Patient11344$pANN_0.25_5eNeg04_1395 <- NULL
#1137-EO-1 sample
sc3=load10X("/nfs/turbo/umms-kretzler-covid19/NovaA-246/1137-EO/NovaA-
246/Sample_1137-EO-1/outs")
sc3=autoEstCont(sc3)
out3=adjustCounts(sc3)
Patient11371 <- CreateSeuratObject(out3)
Patient11371$TNF <- "TNFHigh"
Patient11371$ID <- "Patient11371"
Patient11371$NS <- "MCD"
Patient11371[["percent.mt"]] <- PercentageFeatureSet(Patient11371, pattern="^MT-")
Patient11371 <- subset(Patient11371, subset = nFeature_RNA > 500 & nFeature_RNA
<5000 & percent.mt <10)
Patient11371 <- NormalizeData(Patient11371,
normalization.method="LogNormalize", scale.factor = 10000)
Patient11371 <- FindVariableFeatures(Patient11371, selection.method="vst", nfeatures=
2000)
Patient11371 <- ScaleData(Patient11371)
Patient11371 <- RunPCA(Patient11371, features = VariableFeatures(object =
Patient11371))
Patient11371 <- FindNeighbors(Patient11371, dims = 1:30)
Patient11371 <- FindClusters(Patient11371, resolution = 0.6)

```

```

Patient11371 <- RunUMAP(Patient11371, dims = 1:30)
sweep.res.list_Patient11371 <- paramSweep_v3(Patient11371, PCs = 1:10, sct=FALSE)
sweep.stats_Patient11371 <- summarizeSweep(sweep.res.list_Patient11371, GT =
FALSE)
bcmvn_Patient11371 <- find.pK(sweep.stats_Patient11371)
pK_Patient11371 <- bcmvn_Patient11371 %>% filter(BCmetric == max(BCmetric))
%>% select(pK)
pK_Patient11371 <- as.numeric(as.character(pK_Patient11371[[1]]))
annotations_Patient11371 <- Patient11371@meta.data$seurat_clusters
homotypic.prop_Patient11371 <- modelHomotypic(annotations_Patient11371)
nExp_poi_Patient11371 <- round(0.075*nrow(Patient11371@meta.data))
nExp_poi_adj_Patient11371 <- round(nExp_poi_Patient11371*(1-
homotypic.prop_Patient11371))
Patient11371 <- doubletFinder_v3(Patient11371, PCs = 1:10, pN = 0.25, pK =
pK_Patient11371, nExp = nExp_poi_adj_Patient11371, reuse.pANN = FALSE, sct =
FALSE)
Patient11371 <- subset(x=Patient11371, subset = DF.classifications_0.25_0.3_322 ==
"Singlet")
Patient11371$DF.classifications_0.25_0.3_322 <- NULL
Patient11371$pANN_0.25_0.3_322 <- NULL
#1138-EO-2 sample
sc4=load10X("/nfs/turbo/umms-kretzler-covid19/NovaA-246/1138-EO/NovaA-
246/Sample_1138-EO-2/outs")
sc4=autoEstCont(sc4)
out4=adjustCounts(sc4)
Patient11382 <- CreateSeuratObject(out4)
Patient11382$TNF <- "TNFHigh"
Patient11382$ID <- "Patient11382"
Patient11382$NS <- "FSGS"
Patient11382[["percent.mt"]] <- PercentageFeatureSet(Patient11382, pattern="^MT-")
Patient11382 <- subset(Patient11382, subset = nFeature_RNA > 500 & nFeature_RNA
<5000 & percent.mt <10)
Patient11382 <- NormalizeData(Patient11382,
normalization.method="LogNormalize",scale.factor = 10000)
Patient11382 <- FindVariableFeatures(Patient11382, selection.method="vst",nfeatures=
2000)
Patient11382 <- ScaleData(Patient11382)
Patient11382 <- RunPCA(Patient11382, features = VariableFeatures(object =
Patient11382))
Patient11382 <- FindNeighbors(Patient11382, dims = 1:30)
Patient11382 <- FindClusters(Patient11382, resolution = 0.6)
Patient11382 <- RunUMAP(Patient11382, dims = 1:30)
sweep.res.list_Patient11382 <- paramSweep_v3(Patient11382, PCs = 1:10, sct=FALSE)
sweep.stats_Patient11382 <- summarizeSweep(sweep.res.list_Patient11382, GT =
FALSE)
bcmvn_Patient11382 <- find.pK(sweep.stats_Patient11382)

```

```

pK_Patient11382 <- bcmvn_Patient11382 %>% filter(BCmetric == max(BCmetric))
%>% select(pK)
pK_Patient11382 <- as.numeric(as.character(pK_Patient11382[[1]]))
annotations_Patient11382 <- Patient11382@meta.data$seurat_clusters
homotypic.prop_Patient11382 <- modelHomotypic(annotations_Patient11382)
nExp_poi_Patient11382 <- round(0.075*nrow(Patient11382@meta.data))
nExp_poi_adj_Patient11382 <- round(nExp_poi_Patient11382*(1-
homotypic.prop_Patient11382))
Patient11382 <- doubletFinder_v3(Patient11382, PCs = 1:10, pN = 0.25, pK =
pK_Patient11382, nExp = nExp_poi_adj_Patient11382, reuse.pANN = FALSE, sct =
FALSE)
Patient11382 <- subset(x=Patient11382, subset = DF.classifications_0.25_0.06_74 ==
"Singlet")
Patient11382$DF.classifications_0.25_0.06_74 <- NULL
Patient11382$pANN_0.25_0.06_74 <- NULL
#TNF_Low
#1144-EO-2 sample
sc5=load10X("/nfs/turbo/umms-kretzler-covid19/NovaA-246/1144-EO/NovaA-
246/Sample_1144-EO-2/outs")
sc5=autoEstCont(sc5,tfidfMin=0.8,forceAccept=TRUE)
out5=adjustCounts(sc5)
Patient11442 <- CreateSeuratObject(out5)
Patient11442$TNF <- "TNFLow"
Patient11442$ID <- "Patient11442"
Patient11442$NS <- "FSGS"
Patient11442[["percent.mt"]] <- PercentageFeatureSet(Patient11442, pattern="^MT-")
Patient11442 <- subset(Patient11442, subset = nFeature_RNA > 500 & nFeature_RNA
<5000 & percent.mt <10)
Patient11442<- NormalizeData(Patient11442,
normalization.method="LogNormalize",scale.factor = 10000)
Patient11442 <- FindVariableFeatures(Patient11442, selection.method="vst",nfeatures=
2000)
Patient11442 <- ScaleData(Patient11442)
Patient11442 <- RunPCA(Patient11442, features = VariableFeatures(object =
Patient11442))
Patient11442 <- FindNeighbors(Patient11442, dims = 1:30)
Patient11442 <- FindClusters(Patient11442, resolution = 0.6)
Patient11442 <- RunUMAP(Patient11442, dims = 1:30)
sweep.res.list_Patient11442 <- paramSweep_v3(Patient11442, PCs = 1:10, sct=FALSE)
sweep.stats_Patient11442 <- summarizeSweep(sweep.res.list_Patient11442, GT =
FALSE)
bcmvn_Patient11442 <- find.pK(sweep.stats_Patient11442)
pK_Patient11442 <- bcmvn_Patient11442 %>% filter(BCmetric == max(BCmetric))
%>% select(pK)
pK_Patient11442 <- as.numeric(as.character(pK_Patient11442[[1]]))
annotations_Patient11442 <- Patient11442@meta.data$seurat_clusters

```

```

homotypic.prop_Patient11442 <- modelHomotypic(annotations_Patient11442)
nExp_poi_Patient11442 <- round(0.075*nrow(Patient11442@meta.data))
nExp_poi_adj_Patient11442 <- round(nExp_poi_Patient11442*(1-
homotypic.prop_Patient11442))
Patient11442 <- doubletFinder_v3(Patient11442, PCs = 1:10, pN = 0.25, pK =
pK_Patient11442, nExp = nExp_poi_adj_Patient11442, reuse.pANN = FALSE, sct =
FALSE)
Patient11442 <- subset(x=Patient11442, subset = DF.classifications_0.25_0.03_71 ==
"Singlet")
Patient11442$DF.classifications_0.25_0.03_71 <- NULL
Patient11442$pANN_0.25_0.03_71 <- NULL
#1138-EO-1 sample
sc6=load10X("/nfs/turbo/umms-kretzler-covid19/NovaA-246/1138-EO/NovaA-
246/Sample_1138-EO-1/outs")
sc6=autoEstCont(sc6)
out6=adjustCounts(sc6)
Patient11381 <- CreateSeuratObject(out6)
Patient11381$TNF <- "TNFLow"
Patient11381$ID <- "Patient11381"
Patient11381$NS <- "FSGS"
Patient11381[["percent.mt"]] <- PercentageFeatureSet(Patient11381, pattern="^MT-")
Patient11381 <- subset(Patient11381, subset = nFeature_RNA > 500 & nFeature_RNA
<5000 & percent.mt <10)
Patient11381 <- NormalizeData(Patient11381,
normalization.method="LogNormalize",scale.factor = 10000)
Patient11381 <- FindVariableFeatures(Patient11381, selection.method="vst",nfeatures=
2000)
Patient11381 <- ScaleData(Patient11381)
Patient11381 <- RunPCA(Patient11381, features = VariableFeatures(object =
Patient11381))
Patient11381 <- FindNeighbors(Patient11381, dims = 1:30)
Patient11381 <- FindClusters(Patient11381, resolution = 0.6)
Patient11381 <- RunUMAP(Patient11381, dims = 1:30)
sweep.res.list_Patient11381 <- paramSweep_v3(Patient11381, PCs = 1:10, sct=FALSE)
sweep.stats_Patient11381 <- summarizeSweep(sweep.res.list_Patient11381, GT =
FALSE)
bcmvn_Patient11381 <- find.pK(sweep.stats_Patient11381)
pK_Patient11381 <- bcmvn_Patient11381 %>% filter(BCmetric == max(BCmetric))
%>% select(pK)
pK_Patient11381 <- as.numeric(as.character(pK_Patient11381[[1]]))
annotations_Patient11381 <- Patient11381@meta.data$seurat_clusters
homotypic.prop_Patient11381 <- modelHomotypic(annotations_Patient11381)
nExp_poi_Patient11381 <- round(0.075*nrow(Patient11381@meta.data))
nExp_poi_adj_Patient11381 <- round(nExp_poi_Patient11381*(1-
homotypic.prop_Patient11381))
Patient11381 <- doubletFinder_v3(Patient11381, PCs = 1:10, pN = 0.25, pK =

```

```

pK_Patient11381, nExp = nExp_poi_adj_Patient11381, reuse.pANN = FALSE, sct =
FALSE)
Patient11381 <- subset(x=Patient11381, subset = DF.classifications_0.25_0.19_63 ==
"Singlet")
Patient11381$DF.classifications_0.25_0.19_63 <- NULL
Patient11381$pANN_0.25_0.19_63 <- NULL
#1134-EO-1 sample
sc7=load10X("/nfs/turbo/umms-kretzler-covid19/NovaA-240/1134-EO/NovaA-
240/Sample_1134-EO-1/outs")
sc7=autoEstCont(sc7,forceAccept=TRUE)
out7=adjustCounts(sc7)
Patient11341 <- CreateSeuratObject(out7)
Patient11341$TNF <- "TNFLow"
Patient11341$ID <- "Patient11341"
Patient11341$NS <- "MCD"
Patient11341[["percent.mt"]] <- PercentageFeatureSet(Patient11341, pattern="^MT-")
Patient11341 <- subset(Patient11341, subset = nFeature_RNA > 500 & nFeature_RNA
<5000 & percent.mt <10)
Patient11341 <- NormalizeData(Patient11341,
normalization.method="LogNormalize",scale.factor = 10000)
Patient11341 <- FindVariableFeatures(Patient11341, selection.method="vst",nfeatures=
2000)
Patient11341 <- ScaleData(Patient11341)
Patient11341 <- RunPCA(Patient11341, features = VariableFeatures(object =
Patient11341))
Patient11341 <- FindNeighbors(Patient11341, dims = 1:30)
Patient11341 <- FindClusters(Patient11341, resolution = 0.6)
Patient11341 <- RunUMAP(Patient11341, dims = 1:30)
sweep.res.list_Patient11341 <- paramSweep_v3(Patient11341, PCs = 1:10, sct=FALSE)
sweep.stats_Patient11341 <- summarizeSweep(sweep.res.list_Patient11341, GT =
FALSE)
bcmvn_Patient11341 <- find.pK(sweep.stats_Patient11341)
pK_Patient11341 <- bcmvn_Patient11341 %>% filter(BCmetric == max(BCmetric))
%>% select(pK)
pK_Patient11341 <- as.numeric(as.character(pK_Patient11341[[1]]))
annotations_Patient11341 <- Patient11341@meta.data$seurat_clusters
homotypic.prop_Patient11341 <- modelHomotypic(annotations_Patient11341)
nExp_poi_Patient11341 <- round(0.075*nrow(Patient11341@meta.data))
nExp_poi_adj_Patient11341 <- round(nExp_poi_Patient11341*(1-
homotypic.prop_Patient11341))
Patient11341 <- doubletFinder_v3(Patient11341, PCs = 1:10, pN = 0.25, pK =
pK_Patient11341, nExp = nExp_poi_adj_Patient11341, reuse.pANN = FALSE, sct =
FALSE)
Patient11341 <- subset(x=Patient11341, subset = DF.classifications_0.25_0.23_1828 ==
"Singlet")
Patient11341$DF.classifications_0.25_0.23_1828 <- NULL

```



```

Patient11341$pANN_0.25_0.23_1828 <- NULL
#1134-EO-3 sample
sc8=load10X("/nfs/turbo/umms-kretzler-covid19/NovaA-240/1134-EO/NovaA-
240/Sample_1134-EO-3/outs")
sc8=autoEstCont(sc8)
out8=adjustCounts(sc8)
Patient11343 <- CreateSeuratObject(out8)
Patient11343$TNF <- "TNFLow"
Patient11343$ID <- "Patient11343"
Patient11343$NS <- "FSGS"
Patient11343[["percent.mt"]] <- PercentageFeatureSet(Patient11343, pattern="^MT-")
Patient11343 <- subset(Patient11343, subset = nFeature_RNA > 500 & nFeature_RNA
<5000 & percent.mt <10)
Patient11343<- NormalizeData(Patient11343,
normalization.method="LogNormalize",scale.factor = 10000)
Patient11343 <- FindVariableFeatures(Patient11343, selection.method="vst",nfeatures=
2000)
Patient11343 <- ScaleData(Patient11343)
Patient11343 <- RunPCA(Patient11343, features = VariableFeatures(object =
Patient11343))
Patient11343 <- FindNeighbors(Patient11343, dims = 1:30)
Patient11343 <- FindClusters(Patient11343, resolution = 0.6)
Patient11343 <- RunUMAP(Patient11343, dims = 1:30)
sweep.res.list_Patient11343 <- paramSweep_v3(Patient11343, PCs = 1:10, sct=FALSE)
sweep.stats_Patient11343 <- summarizeSweep(sweep.res.list_Patient11343, GT =
FALSE)
bcmvn_Patient11343 <- find.pK(sweep.stats_Patient11343)
pK_Patient11343 <- bcmvn_Patient11343 %>% filter(BCmetric == max(BCmetric))
%>% select(pK)
pK_Patient11343 <- as.numeric(as.character(pK_Patient11343[[1]]))
annotations_Patient11343 <- Patient11343@meta.data$seurat_clusters
homotypic.prop_Patient11343 <- modelHomotypic(annotations_Patient11343)
nExp_poi_Patient11343 <- round(0.075*nrow(Patient11343@meta.data))
nExp_poi_adj_Patient11343 <- round(nExp_poi_Patient11343*(1-
homotypic.prop_Patient11343))
Patient11343 <- doubletFinder_v3(Patient11343, PCs = 1:10, pN = 0.25, pK =
pK_Patient11343, nExp = nExp_poi_adj_Patient11343, reuse.pANN = FALSE, sct =
FALSE)
Patient11343 <- subset(x=Patient11343, subset = DF.classifications_0.25_0.14_171 ==
"Singlet")
Patient11343$DF.classifications_0.25_0.14_171 <- NULL
Patient11343$pANN_0.25_0.14_171 <- NULL
#1137-EO-2 sample
sc9=load10X("/nfs/turbo/umms-kretzler-covid19/NovaA-246/1137-EO/NovaA-
246/Sample_1137-EO-2/outs")
sc9=autoEstCont(sc9,forceAccept=TRUE)

```

```

out9=adjustCounts(sc9)
Patient11372 <- CreateSeuratObject(out9)
Patient11372$TNF <- "TNFLow"
Patient11372$ID <- "Patient11372"
Patient11372$NS <- "FSGS"
Patient11372[["percent.mt"]] <- PercentageFeatureSet(Patient11372, pattern="^MT-")
Patient11372 <- subset(Patient11372, subset = nFeature_RNA > 500 & nFeature_RNA
<5000 & percent.mt <10)
Patient11372 <- NormalizeData(Patient11372,
normalization.method="LogNormalize",scale.factor = 10000)
Patient11372 <- FindVariableFeatures(Patient11372, selection.method="vst",nfeatures=
2000)
Patient11372 <- ScaleData(Patient11372)
Patient11372 <- RunPCA(Patient11372, features = VariableFeatures(object =
Patient11372))
Patient11372 <- FindNeighbors(Patient11372, dims = 1:30)
Patient11372 <- FindClusters(Patient11372, resolution = 0.6)
Patient11372 <- RunUMAP(Patient11372, dims = 1:30)
sweep.res.list_Patient11372 <- paramSweep_v3(Patient11372, PCs = 1:10, sct=FALSE)
sweep.stats_Patient11372 <- summarizeSweep(sweep.res.list_Patient11372, GT =
FALSE)
bcmvn_Patient11372 <- find.pK(sweep.stats_Patient11372)
pK_Patient11372 <- bcmvn_Patient11372 %>% filter(BCmetric == max(BCmetric))
%>% select(pK)
pK_Patient11372 <- as.numeric(as.character(pK_Patient11372[[1]]))
annotations_Patient11372 <- Patient11372@meta.data$seurat_clusters
homotypic.prop_Patient11372 <- modelHomotypic(annotations_Patient11372)
nExp_poi_Patient11372 <- round(0.075*nrow(Patient11372@meta.data))
nExp_poi_adj_Patient11372 <- round(nExp_poi_Patient11372*(1-
homotypic.prop_Patient11372))
Patient11372 <- doubletFinder_v3(Patient11372, PCs = 1:10, pN = 0.25, pK =
pK_Patient11372, nExp = nExp_poi_adj_Patient11372, reuse.pANN = FALSE, sct =
FALSE)
Patient11372 <- subset(x=Patient11372, subset = DF.classifications_0.25_0.06_1065 ==
"Singlet")
Patient11372$DF.classifications_0.25_0.06_1065 <- NULL
Patient11372$pANN_0.25_0.06_1065 <- NULL
#Merge the data to setup for the RPCA integration
AllTNF <- merge(Patient11341,
y=c(Patient11342,Patient11343,Patient11344,Patient11371,Patient11372,Patient11381,P
atient11382,Patient11442,Patient11443),add.cell.ids=c("11341","11342","11343","1134
4","11371","11372","11381","11382","11442","11443"),project="TNFIntegrate")
AllTNF.list <- SplitObject(AllTNF, split.by="TNF")
AllTNF.list <- lapply(X=AllTNF.list, FUN=function(x) {
x <- NormalizeData(x)
x <- FindVariableFeatures(x, selection.method="vst",nfeatures=2000)

```

```

})
features <- SelectIntegrationFeatures(object.list=AllTNF.list)
AllTNF.list <- lapply(X = AllTNF.list, FUN=function(x) {
  x <- ScaleData(x, features=features, verbose = FALSE)
  x <- RunPCA(x, features=features, verbose=FALSE)
})
#RPCA Integration
TNFanchors <- FindIntegrationAnchors(object.list=AllTNF.list,
reference=c(1,2),anchor.features=features, reduction="rpca")
TNFcombined <- IntegrateData(anchorset=TNFanchors,dims=1:30)
DefaultAssay(TNFcombined) <- "integrated"
#Default Seurat pipeline
TNFcombined <- ScaleData(TNFcombined)
TNFcombined <- RunPCA(TNFcombined,
features=VariableFeatures(object=TNFcombined))
TNFcombined <- FindNeighbors(TNFcombined, dims=1:30)
TNFcombined <- FindClusters(TNFcombined, resolution=0.6)
TNFcombined <- RunUMAP(TNFcombined, dims=1:30)
saveRDS(TNFcombined, "/data/pjlmac/TNF_Redo_SoupX_DoubletFinder_RPCA.rds")
#Generate cluster markers and match back to reference
WholeNephron.markers <- FindAllMarkers(TNFcombined, min.pct=0.25,
only.pos=TRUE, logfc.threshold = 0.25)
WholeNephron.markers %>% group_by(cluster) %>% top_n(n = 2, wt = avg_logFC)
ConstantMarkers <- read.csv("/home/pjlmac/ReferenceMarkers1.csv")
ConstantNephron <- left_join(WholeNephron.markers,ConstantMarkers)
write.csv(ConstantNephron, "/data/pjlmac/TNF_Redo_Cleaned_ClusterAnalysis_.csv")
#One additional DoubletFinder markup oddly appeared in the data; purged with this line
below.
TNFcombined$DF.classifications_0.25_0.005_684 <- NULL
#Premiere and KPMP Markers nomenclature used per cluster
#Very detailed cluster labels
new.cluster.ids <- c("PT-S1-S2","dPT-S1-1","TAL","dPT-S2-S3-1","dPT-S2-S3-
2","FIB","dPT-S1-S2-1","PC/IC","dPT-S2-S3-3","PT-S2-S3","dPT-S1-2","dPT-S1-S2-
2","cyclingPT","adaptivePT","PT-S1-1","Immune","DTL","PT-S1-2","EC-
GC","ATL","DCT","POD")
names(new.cluster.ids) <- levels(TNFcombined)
TNFcombined <- RenameIdents(TNFcombined,new.cluster.ids)
TNFcombined$Compartment_Level <- Idents(TNFcombined)
#A bit less detailed cluster labels
new.cluster.ids <- c("PT-1","degenPT-1","TAL","degenPT-2","degenPT-
3","FIB","degenPT-4","PC/IC","degenPT-5","PT-2","degenPT-6","degenPT-
7","cyclingPT","adaptivePT","PT-3","Immune","DTL","PT-4","EC-
GC","ATL","DCT","POD")
names(new.cluster.ids) <- levels(TNFcombined)
TNFcombined <- RenameIdents(TNFcombined,new.cluster.ids)
TNFcombined$celltype <- Idents(TNFcombined)

```

```
#Cluster labels used in the manuscript
new.cluster.ids <- c("PT",
"PT","TAL","PT","PT","FIB","PT","PC/IC","PT","PT","PT","PT","PT","PT","PT","Im
mune","DTL","PT","EC","ATL","DCT","POD")
names(new.cluster.ids) <- levels(TNFcombined)
TNFcombined <- RenameIdents(TNFcombined,new.cluster.ids)
TNFcombined$PublicationLabels <- Idents(TNFcombined)
saveRDS(TNFcombined,
"/data/pjlmac/TNF_RPCA_NoDoublets_LabelsWKPMP_v4.rds")
```

### *Organoid qRT-PCR:*

RNA quantity and quality was assessed by Nanodrop (ThermoFisher) via 260/280 ranging 1.91-2.04. One  $\mu\text{g}$  of total RNA was then reverse-transcribed into cDNA using SuperScriptFirst-Strand kit (Invitrogen, Cat# 11904-018) per manufacturer's protocol. Quantitative real-time PCR was performed on a QuantStudio™ 7 Flex Real-Time PCR System (ThermoFisher) with sample analysis performed in triplicate using TaqMan Fast Universal PCR Master Mix (2X) (Applied Biosystems, Cat# 4352042) with the following Taq-Man Assay Reagents (Thermo Fisher): CCL2 (Hs00234140\_m1), TIMP1 (Hs01092512\_g1), and GAPDH (Hs03929097\_g1).

The  $\Delta\Delta\text{C}_q$  method was applied to calculate the relative quantity (RQ, or fold change) of target genes after normalization to GAPDH. Graphs were plotted using GraphPad Prism software.

### *Organoid RNAseq quality assessment:*

Individual reads were inspected for quality measures such as adapter content, GC content, and per-base sequence quality with FastQC (<http://www.bioinformatics.babraham.ac.uk/projects/fastqc/>). Reads were examined for contamination of foreign as well as disproportional amounts of off-target RNA using

FastqScreen<sup>s11</sup>, randomly sampling reads from each subject and mapping them to 16 different organisms and artifacts. Mapping to the human reference genome GRCh38 was performed with STAR 2.5.2b<sup>s14</sup>. The mapped reads were inspected for distribution across exons, introns, UTR and intergenic regions using picardtools (<https://broadinstitute.github.io/picard/>). Annotation and quantification of mapping results on the gene level was performed with HTseq<sup>s15</sup>. Counts were transformed with voom<sup>s16</sup> for quality evaluation on the dataset level. Principal Component analysis and hierarchical clustering were used to identify any outlier samples. All samples passed quality control criteria. A TNF activation score for all samples was generated as explained earlier from TNF signature gene profiles.

## Supplementary References

- s1. Johnson WE, Li C, Rabinovic A: Adjusting batch effects in microarray expression data using empirical Bayes methods. *Biostatistics*, 8: 118-127, 2007 10.1093/biostatistics/kxj037
- s2. Lai JY, Luo J, O'Connor C, Jing X, Nair V, Ju W, et al.: MicroRNA-21 in Glomerular Injury. *J Am Soc Nephrol*, 26: 805-816, 2015 10.1681/asn.2013121274
- s3. Schmid H, Boucherot A, Yasuda Y, Henger A, Brunner B, Eichinger F, et al.: Modular Activation of Nuclear Factor- $\kappa$ B Transcriptional Programs in Human Diabetic Nephropathy. *Diabetes*, 55: 2993-3003, 2006 10.2337/db06-0477
- s4. Cohen CD, Frach K, Schlondorff D, Kretzler M: Quantitative gene expression analysis in renal biopsies: a novel protocol for a high-throughput multicenter application. *Kidney Int*, 61: 133-140, 2002 10.1046/j.1523-1755.2002.00113.x
- s5. Grayson PC, Eddy S, Taroni JN, Lightfoot YL, Mariani L, Parikh H, et al.: Metabolic pathways and immunometabolism in rare kidney diseases. *Ann Rheum Dis*, 77: 1226-1233, 2018 10.1136/annrheumdis-2017-212935
- s6. Martini S, Nair V, Keller BJ, Eichinger F, Hawkins JJ, Randolph A, et al.: Integrative biology identifies shared transcriptional networks in CKD. *J Am Soc Nephrol*, 25: 2559-2572, 2014 10.1681/ASN.2013080906
- s7. Irizarry RA, Hobbs B, Collin F, Beazer-Barclay YD, Antonellis KJ, Scherf U, et al.: Exploration, normalization, and summaries of high density oligonucleotide array probe level data. *Biostatistics*, 4: 249-264, 2003 10.1093/biostatistics/4.2.249
- s8. Lockstone HE: Exon array data analysis using Affymetrix power tools and R statistical software. *Brief Bioinform*, 12: 634-644, 2011 10.1093/bib/bbq086
- s9. Dai M, Wang P, Boyd AD, Kostov G, Athey B, Jones EG, et al.: Evolving gene/transcript definitions significantly alter the interpretation of GeneChip data. *Nucleic Acids Res*, 33: e175, 2005 10.1093/nar/gni179
- s10. Sandberg R, Larsson O: Improved precision and accuracy for microarrays using updated probe set definitions. *BMC Bioinformatics*, 8: 48, 2007 10.1186/1471-2105-8-48
- s11. Wingett SW, Andrews S: FastQ Screen: A tool for multi-genome mapping and quality control. *F1000Research*, 7: 1338, 2018 10.12688/f1000research.15931.2
- s12. Young MD, Behjati S. SoupX removes ambient RNA contamination from droplet-based single-cell RNA sequencing data. *GigaScience* 2020; **9**.
- s13. McGinnis CS, Murrow LM, Gartner ZJ. DoubletFinder: Doublet Detection in Single-Cell RNA Sequencing Data Using Artificial Nearest Neighbors. *Cell Systems* 2019; **8**: 329-337.e324.
- s14. Dobin A, Davis CA, Schlesinger F, Drenkow J, Zaleski C, Jha S, et al.: STAR: ultrafast universal RNA-seq aligner. *Bioinformatics*, 29: 15-21, 2013 10.1093/bioinformatics/bts635
- s15. Anders S, Pyl PT, Huber W: HTSeq-a Python framework to work with high-throughput sequencing data. *Bioinformatics*, 31: 166-169, 2015 10.1093/bioinformatics/btu638
- s16. Law CW, Chen Y, Shi W, Smyth GK: voom: Precision weights unlock linear model analysis tools for RNA-seq read counts. *Genome Biol*, 15: R29, 2014 10.1186/gb-2014-15-2-r29

**Supplementary Figure S1. Cluster dendrogram and assignment of minimal change disease (MCD) and focal segmental glomerulosclerosis (FSGS) participants based on kidney biopsy tubulointerstitial gene expression data in North American Nephrotic Syndrome Study Network (NEPTUNE), European Renal cDNA Bank (ERCB), and Human Heredity and Health in Africa Kidney Disease Research Network cohort (H3 Africa). Optimal cluster determination and similarity matrices using different clustering algorithms from transcriptomic profiles of MCD and FSGS participants based on kidney biopsy tubulointerstitial gene expression data in NEPTUNE (A), ERCB (B), and H3 Africa (C). Sankey diagrams from the ERCB (D) and H3 Africa (E) cohorts comparing diagnosis with cluster assignment.**

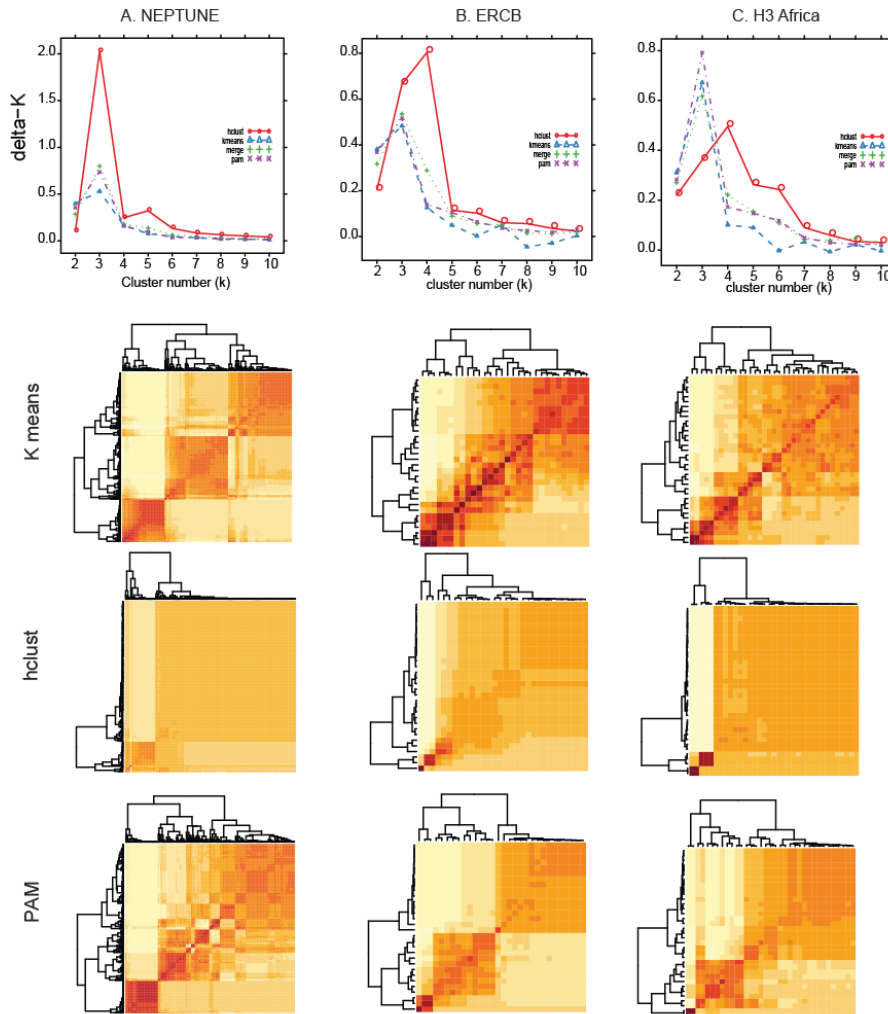

D.

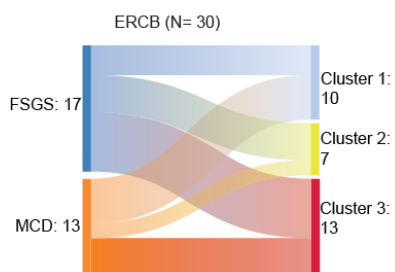

E.

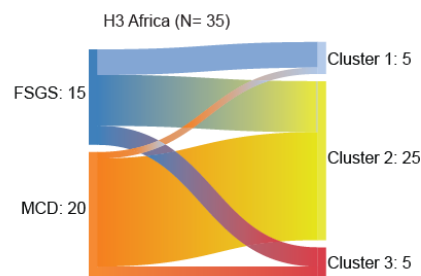

**Supplementary Figure S2. Comparison of cluster assignment and clinical measures in NEPTUNE and ERCB using glomerular compartment expression data.** Optimal cluster determination and similarity matrices using different clustering algorithms from transcriptomic profiles of MCD and FSGS participants based on kidney biopsy glomerular gene expression data in NEPTUNE (A), and ERCB (B).

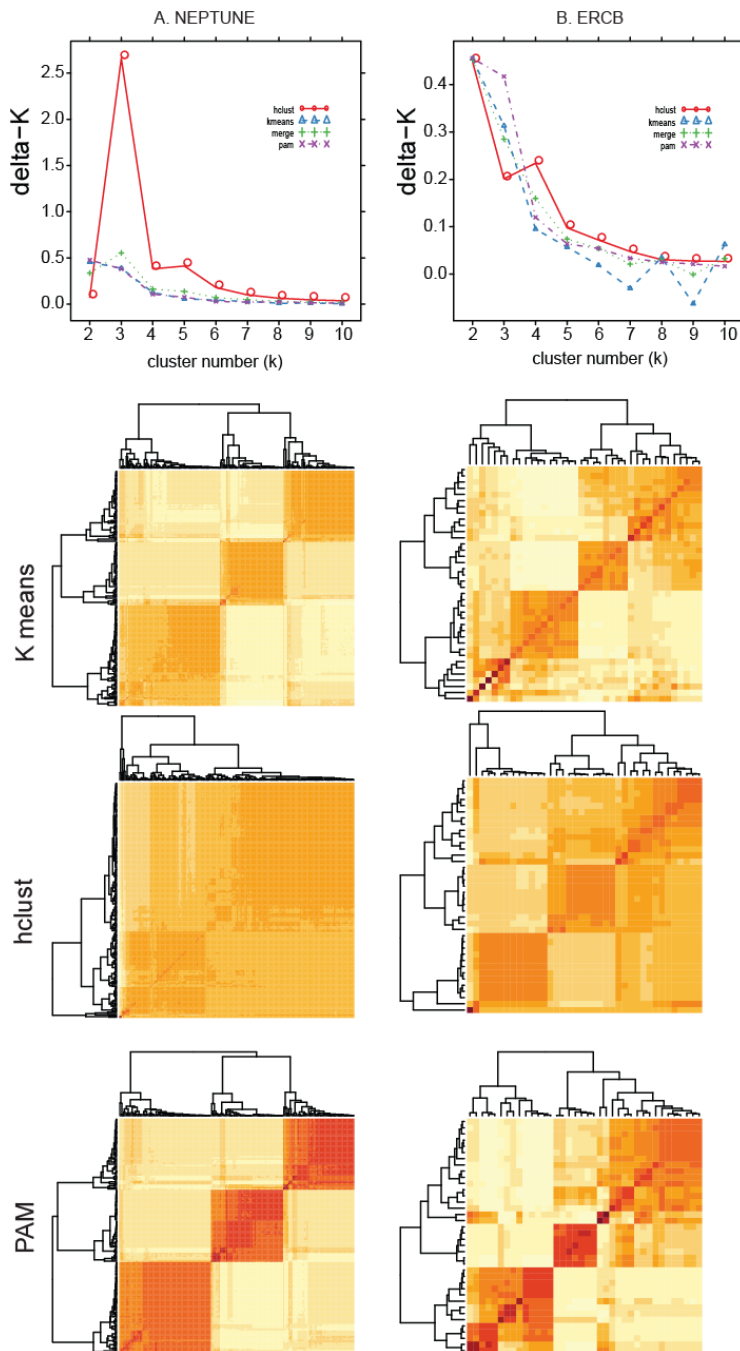



**Supplementary Figure S3. Comparison of clinical factors and cluster assignment across cohorts.**  
Clinical information analyzed by cluster for eGFR (A), Age (B), and UPCR (C) across the cohorts.

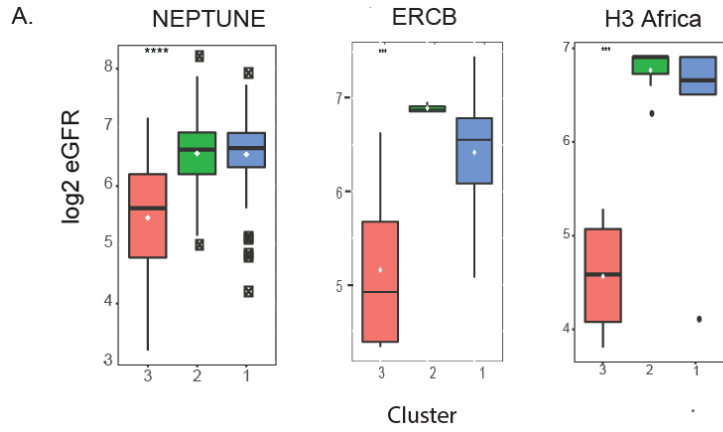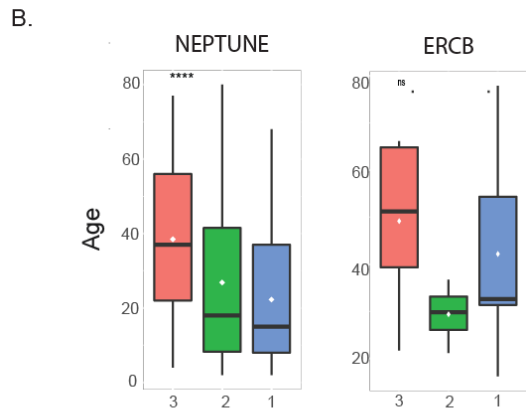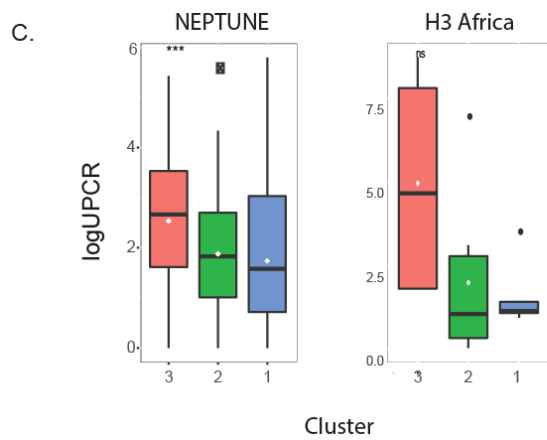

**Supplementary Figure S4. Urine marker levels by diagnosis and cluster.** Urine markers for chemokine (C-C motif) ligand 2 (CCL2) / monocyte chemoattractant protein-1 (MCP-1) (left panel) and tissue inhibitor of metalloproteinases 1 (TIMP-1) (right panel) were assayed in duplicate and normalized to urine creatinine as described in the methods. Data are presented as log<sub>2</sub> transformed urine marker levels by disease and TNF cluster. Significance of log<sub>2</sub> transformed values was determined by Welch's t-test comparing samples in cluster T3 to those in clusters T1 and T2 as indicated in the accompanying table.

ELISA levels by cluster and diagnosis

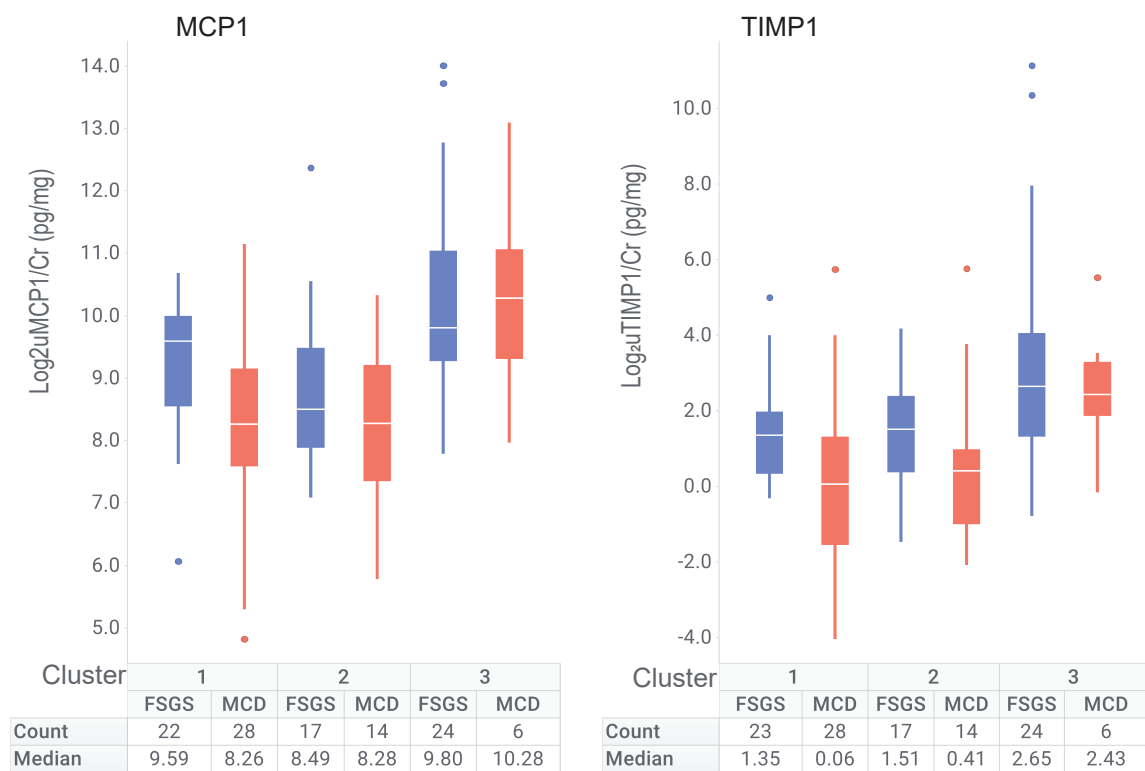

| Comparisons                               | Log <sub>2</sub> uMCP/Cr (pg/mg) | Log <sub>2</sub> uTIMP1/Cr (ng/mg) |
|-------------------------------------------|----------------------------------|------------------------------------|
| Cluster 3 vs. Cluster 1 and 2             | p<0.0005                         | p<0.0001                           |
| Cluster 3 vs. Cluster 1 and 2 (MCD only)  | p<0.05                           | p<0.05                             |
| Cluster 3 vs. Cluster 1 and 2 (FSGS only) | p<0.005                          | p<0.005                            |
| Cluster 3 FSGS vs Cluster 3 MCD           | p=0.47                           | p=0.25                             |

**Supplementary Table S1a. List of differentially expressed genes in Cluster 3 versus Clusters 1 and 2.** List of differentially expressed genes (absolute FC>1.5, q<0.05) in Cluster 3 versus Clusters 1 and 2, in each cohort, used for enrichment analyses.

| Cohort  | Ensembl or EntrezGene identifier | Symbol       | Fold change | q-value  |
|---------|----------------------------------|--------------|-------------|----------|
| NEPTUNE | ENSG00000167748                  | KLK1         | -7.36       | 1.18E-23 |
| NEPTUNE | ENSG00000162391                  | FAM151A      | -4.36       | 8.64E-24 |
| NEPTUNE | ENSG00000134042                  | MRO          | -4.19       | 1.08E-33 |
| NEPTUNE | ENSG00000226733                  | LOC100505985 | -4.01       | 2.59E-25 |
| NEPTUNE | ENSG00000198569                  | SLC34A3      | -3.97       | 5.66E-30 |
| NEPTUNE | ENSG00000164199                  | ADGRV1       | -3.83       | 5.38E-21 |
| NEPTUNE | ENSG00000139988                  | RDH12        | -3.81       | 1.59E-19 |
| NEPTUNE | ENSG00000100884                  | CPNE6        | -3.71       | 2.59E-11 |
| NEPTUNE | ENSG00000213901                  | SLC23A3      | -3.62       | 1.39E-27 |
| NEPTUNE | ENSG00000146809                  | ASB15        | -3.50       | 1.13E-26 |
| NEPTUNE | ENSG00000131482                  | G6PC1        | -3.50       | 6.40E-17 |
| NEPTUNE | ENSG00000158865                  | SLC5A11      | -3.47       | 1.31E-24 |
| NEPTUNE | ENSG00000178363                  | CALML3       | -3.44       | 4.52E-21 |
| NEPTUNE | ENSG00000244067                  | GSTA2        | -3.42       | 7.96E-19 |
| NEPTUNE | ENSG00000160868                  | CYP3A4       | -3.40       | 1.38E-30 |
| NEPTUNE | ENSG00000174358                  | SLC6A19      | -3.34       | 3.16E-19 |
| NEPTUNE | ENSG00000215277                  | RNF212B      | -3.28       | 2.05E-18 |
| NEPTUNE | ENSG00000122194                  | PLG          | -3.27       | 1.26E-19 |
| NEPTUNE | ENSG00000163586                  | FABP1        | -3.26       | 1.20E-22 |
| NEPTUNE | ENSG00000100889                  | PCK2         | -3.26       | 5.83E-34 |
| NEPTUNE | ENSG00000134864                  | GGACT        | -3.23       | 2.57E-29 |
| NEPTUNE | ENSG00000138798                  | EGF          | -3.18       | 4.72E-18 |
| NEPTUNE | ENSG00000079557                  | AFM          | -3.17       | 1.77E-21 |
| NEPTUNE | ENSG00000100253                  | MIOX         | -3.15       | 8.46E-23 |
| NEPTUNE | ENSG00000186335                  | SLC36A2      | -3.07       | 2.63E-22 |
| NEPTUNE | ENSG00000099994                  | SUSD2        | -3.04       | 2.80E-23 |
| NEPTUNE | ENSG00000103154                  | NECAB2       | -3.01       | 6.67E-24 |
| NEPTUNE | ENSG00000136943                  | CTSV         | -3.01       | 6.39E-25 |
| NEPTUNE | ENSG0000015413                   | DPEP1        | -3.00       | 3.34E-21 |
| NEPTUNE | ENSG00000137868                  | STRA6        | -2.99       | 1.57E-17 |
| NEPTUNE | ENSG00000243955                  | GSTA1        | -2.99       | 2.45E-19 |
| NEPTUNE | ENSG00000104808                  | DHDH         | -2.97       | 4.81E-23 |
| NEPTUNE | ENSG00000143257                  | NR1I3        | -2.97       | 1.38E-20 |
| NEPTUNE | ENSG00000172482                  | AGXT         | -2.93       | 1.69E-11 |
| NEPTUNE | ENSG00000164089                  | ETNPPL       | -2.92       | 4.52E-19 |
| NEPTUNE | ENSG00000122121                  | XPNPEP2      | -2.91       | 2.19E-17 |
| NEPTUNE | ENSG00000110887                  | DAO          | -2.90       | 1.62E-24 |
| NEPTUNE | ENSG00000158104                  | HPD          | -2.89       | 3.23E-23 |
| NEPTUNE | ENSG00000149452                  | SLC22A8      | -2.87       | 9.99E-15 |
| NEPTUNE | ENSG00000211452                  | DIO1         | -2.86       | 2.03E-22 |
| NEPTUNE | ENSG00000251637                  | LINC02754    | -2.86       | 7.61E-26 |
| NEPTUNE | ENSG00000091583                  | APOH         | -2.85       | 3.96E-18 |
| NEPTUNE | ENSG00000100344                  | PNPLA3       | -2.83       | 1.73E-25 |
| NEPTUNE | ENSG00000261795                  | RP11_90P131  | -2.82       | 3.58E-18 |
| NEPTUNE | ENSG00000138678                  | GPAT3        | -2.81       | 6.52E-30 |
| NEPTUNE | ENSG00000172940                  | SLC22A13     | -2.81       | 2.34E-23 |

|         |                 |              |       |          |
|---------|-----------------|--------------|-------|----------|
| NEPTUNE | ENSG00000132855 | ANGPTL3      | -2.81 | 4.80E-22 |
| NEPTUNE | ENSG00000229005 | HNF4A-AS1    | -2.81 | 8.92E-31 |
| NEPTUNE | ENSG00000110245 | APOC3        | -2.80 | 4.87E-15 |
| NEPTUNE | ENSG00000160862 | AZGP1        | -2.80 | 8.32E-26 |
| NEPTUNE | ENSG00000187621 | TCL6         | -2.78 | 2.36E-31 |
| NEPTUNE | ENSG00000134612 | FOLH1B       | -2.77 | 1.39E-23 |
| NEPTUNE | ENSG00000204444 | APOM         | -2.76 | 1.90E-25 |
| NEPTUNE | ENSG00000116882 | HAO2         | -2.76 | 1.02E-20 |
| NEPTUNE | ENSG00000062096 | ARSF         | -2.75 | 3.40E-18 |
| NEPTUNE | ENSG00000164325 | TMEM174      | -2.75 | 3.64E-25 |
| NEPTUNE | ENSG00000129214 | SHBG         | -2.75 | 3.47E-25 |
| NEPTUNE | ENSG00000164303 | ENPP6        | -2.74 | 1.25E-24 |
| NEPTUNE | ENSG00000250799 | PRODH2       | -2.74 | 4.07E-18 |
| NEPTUNE | ENSG00000171759 | PAH          | -2.73 | 1.62E-18 |
| NEPTUNE | ENSG00000186466 | AQP7P1       | -2.73 | 1.08E-23 |
| NEPTUNE | ENSG00000100024 | UPB1         | -2.72 | 2.76E-27 |
| NEPTUNE | ENSG00000204653 | ASPDH        | -2.68 | 5.54E-28 |
| NEPTUNE | ENSG00000117601 | SERPINC1     | -2.64 | 2.18E-22 |
| NEPTUNE | ENSG00000145692 | BHMT         | -2.64 | 2.74E-22 |
| NEPTUNE | ENSG00000143627 | PKLR         | -2.64 | 2.58E-19 |
| NEPTUNE | ENSG00000227877 | MRLN         | -2.64 | 4.95E-20 |
| NEPTUNE | ENSG00000196549 | MME          | -2.61 | 1.77E-26 |
| NEPTUNE | ENSG00000117009 | KMO          | -2.60 | 5.12E-28 |
| NEPTUNE | ENSG00000138823 | MTTP         | -2.57 | 5.96E-28 |
| NEPTUNE | ENSG00000130707 | ASS1         | -2.54 | 1.35E-32 |
| NEPTUNE | ENSG00000182327 | GLTPD2       | -2.54 | 1.24E-15 |
| NEPTUNE | ENSG00000183535 | COL18A1-AS1  | -2.53 | 1.29E-24 |
| NEPTUNE | ENSG00000173826 | KCNH6        | -2.53 | 2.31E-14 |
| NEPTUNE | ENSG00000156398 | SFXN2        | -2.51 | 1.54E-32 |
| NEPTUNE | ENSG00000172478 | MAB21L4      | -2.50 | 4.56E-08 |
| NEPTUNE | ENSG00000099834 | CDHR5        | -2.50 | 3.92E-18 |
| NEPTUNE | ENSG00000160870 | CYP3A7       | -2.49 | 5.55E-22 |
| NEPTUNE | ENSG00000197901 | SLC22A6      | -2.49 | 1.39E-16 |
| NEPTUNE | ENSG00000186529 | CYP4F3       | -2.49 | 1.75E-23 |
| NEPTUNE | ENSG00000140263 | SORD         | -2.48 | 3.47E-31 |
| NEPTUNE | ENSG00000148795 | CYP17A1      | -2.48 | 1.29E-09 |
| NEPTUNE | ENSG00000171234 | UGT2B7       | -2.48 | 7.33E-22 |
| NEPTUNE | ENSG00000166840 | GLYATL1      | -2.47 | 5.00E-20 |
| NEPTUNE | ENSG00000126231 | PROZ         | -2.47 | 1.33E-16 |
| NEPTUNE | ENSG00000100053 | CRYBB3       | -2.46 | 1.10E-19 |
| NEPTUNE | ENSG00000234996 | ACTG1P25     | -2.45 | 9.68E-35 |
| NEPTUNE | ENSG00000205279 | CTXN3        | -2.43 | 1.22E-12 |
| NEPTUNE | ENSG00000167701 | GPT          | -2.42 | 1.52E-14 |
| NEPTUNE | ENSG00000164893 | SLC7A13      | -2.41 | 5.20E-04 |
| NEPTUNE | ENSG00000253196 | RP11_706C167 | -2.41 | 2.71E-23 |
| NEPTUNE | ENSG00000163631 | ALB          | -2.41 | 5.83E-05 |
| NEPTUNE | ENSG00000131183 | SLC34A1      | -2.41 | 3.77E-12 |
| NEPTUNE | ENSG00000119711 | ALDH6A1      | -2.41 | 2.73E-32 |
| NEPTUNE | ENSG00000158296 | SLC13A3      | -2.41 | 6.25E-13 |
| NEPTUNE | ENSG00000139540 | SLC39A5      | -2.41 | 1.76E-19 |
| NEPTUNE | ENSG00000118094 | TREH         | -2.40 | 9.05E-18 |
| NEPTUNE | ENSG00000082293 | COL19A1      | -2.39 | 5.83E-24 |
| NEPTUNE | ENSG00000187048 | CYP4A11      | -2.38 | 9.28E-13 |

|         |                 |              |       |          |
|---------|-----------------|--------------|-------|----------|
| NEPTUNE | ENSG00000172955 | ADH6         | -2.38 | 1.81E-20 |
| NEPTUNE | ENSG00000258472 | AC005726.1   | -2.37 | 2.30E-14 |
| NEPTUNE | ENSG00000160282 | FTCD         | -2.37 | 9.82E-13 |
| NEPTUNE | ENSG00000145832 | SLC25A48     | -2.36 | 1.57E-19 |
| NEPTUNE | ENSG00000179761 | PIPOX        | -2.35 | 2.02E-18 |
| NEPTUNE | ENSG00000123453 | SARDH        | -2.35 | 3.21E-22 |
| NEPTUNE | ENSG00000137474 | MYO7A        | -2.34 | 4.03E-21 |
| NEPTUNE | ENSG00000172828 | CES3         | -2.33 | 2.37E-22 |
| NEPTUNE | ENSG00000256162 | SMLR1        | -2.33 | 1.61E-21 |
| NEPTUNE | ENSG00000162881 | OXER1        | -2.33 | 9.49E-22 |
| NEPTUNE | ENSG00000214796 | RP11_480I125 | -2.32 | 4.08E-28 |
| NEPTUNE | ENSG00000116771 | AGMAT        | -2.32 | 3.96E-18 |
| NEPTUNE | ENSG00000183784 | DOCK8-AS1    | -2.31 | 2.04E-17 |
| NEPTUNE | ENSG00000223985 | LINC01874    | -2.31 | 8.27E-13 |
| NEPTUNE | ENSG00000007001 | UPP2         | -2.31 | 1.08E-09 |
| NEPTUNE | ENSG00000171766 | GATM         | -2.31 | 1.26E-18 |
| NEPTUNE | ENSG00000101425 | BPI          | -2.30 | 2.71E-08 |
| NEPTUNE | ENSG00000162365 | CYP4A22      | -2.29 | 1.14E-08 |
| NEPTUNE | ENSG00000173599 | PC           | -2.28 | 3.69E-19 |
| NEPTUNE | ENSG00000178803 | ADORA2A-AS1  | -2.28 | 6.98E-23 |
| NEPTUNE | ENSG00000162877 | PM20D1       | -2.28 | 3.58E-07 |
| NEPTUNE | ENSG00000165449 | SLC16A9      | -2.27 | 6.27E-14 |
| NEPTUNE | ENSG00000138030 | KHK          | -2.27 | 2.50E-28 |
| NEPTUNE | ENSG00000113492 | AGXT2        | -2.26 | 1.96E-16 |
| NEPTUNE | ENSG00000170482 | SLC23A1      | -2.26 | 1.57E-21 |
| NEPTUNE | ENSG00000142484 | TM4SF5       | -2.24 | 1.01E-25 |
| NEPTUNE | ENSG00000186868 | MAPT         | -2.24 | 2.41E-22 |
| NEPTUNE | ENSG00000070915 | SLC12A3      | -2.24 | 3.62E-09 |
| NEPTUNE | ENSG00000255021 | RP11_536I62  | -2.24 | 1.06E-07 |
| NEPTUNE | ENSG00000021488 | SLC7A9       | -2.24 | 1.46E-17 |
| NEPTUNE | ENSG00000112494 | UNC93A       | -2.23 | 5.41E-09 |
| NEPTUNE | ENSG00000165140 | FBP1         | -2.23 | 9.07E-30 |
| NEPTUNE | ENSG00000092068 | SLC7A8       | -2.23 | 4.42E-16 |
| NEPTUNE | ENSG00000132837 | DMGDH        | -2.23 | 3.33E-27 |
| NEPTUNE | ENSG00000161896 | IP6K3        | -2.22 | 6.15E-16 |
| NEPTUNE | ENSG00000214814 | FER1L6       | -2.22 | 4.03E-18 |
| NEPTUNE | ENSG00000197408 | CYP2B6       | -2.21 | 4.55E-13 |
| NEPTUNE | ENSG00000189233 | NUGGC        | -2.21 | 1.76E-20 |
| NEPTUNE | ENSG00000180316 | PNPLA1       | -2.21 | 5.09E-20 |
| NEPTUNE | ENSG00000154025 | SLC5A10      | -2.19 | 1.19E-16 |
| NEPTUNE | ENSG00000144908 | ALDH1L1      | -2.19 | 3.96E-18 |
| NEPTUNE | ENSG00000148942 | SLC5A12      | -2.19 | 1.84E-12 |
| NEPTUNE | ENSG00000007216 | SLC13A2      | -2.19 | 7.64E-16 |
| NEPTUNE | ENSG00000113905 | HRG          | -2.19 | 1.59E-19 |
| NEPTUNE | ENSG00000162551 | ALPL         | -2.18 | 1.37E-24 |
| NEPTUNE | ENSG00000204872 | NAT8B        | -2.18 | 1.14E-16 |
| NEPTUNE | ENSG00000149527 | PLCH2        | -2.18 | 1.56E-09 |
| NEPTUNE | ENSG00000257335 | MGAM         | -2.18 | 9.33E-17 |
| NEPTUNE | ENSG00000282408 | LOC105377924 | -2.17 | 4.05E-19 |
| NEPTUNE | ENSG00000148584 | A1CF         | -2.17 | 2.38E-19 |
| NEPTUNE | ENSG00000142583 | SLC2A5       | -2.17 | 1.57E-16 |
| NEPTUNE | ENSG00000109072 | VTN          | -2.17 | 3.88E-12 |
| NEPTUNE | ENSG00000164756 | SLC30A8      | -2.16 | 3.58E-07 |

|         |                 |              |       |          |
|---------|-----------------|--------------|-------|----------|
| NEPTUNE | ENSG00000234155 | LINC02535    | -2.16 | 3.81E-09 |
| NEPTUNE | ENSG00000137204 | SLC22A7      | -2.16 | 3.27E-11 |
| NEPTUNE | ENSG00000113494 | PRLR         | -2.16 | 1.39E-22 |
| NEPTUNE | ENSG00000258616 | LINC02303    | -2.15 | 5.17E-08 |
| NEPTUNE | ENSG00000181291 | TMEM132E     | -2.15 | 2.85E-13 |
| NEPTUNE | ENSG00000149476 | TKFC         | -2.15 | 3.78E-21 |
| NEPTUNE | ENSG00000182271 | TMIGD1       | -2.15 | 9.88E-32 |
| NEPTUNE | ENSG00000010379 | SLC6A13      | -2.14 | 1.67E-26 |
| NEPTUNE | ENSG00000168306 | ACOX2        | -2.14 | 2.85E-23 |
| NEPTUNE | ENSG00000002726 | AOC1         | -2.13 | 7.94E-13 |
| NEPTUNE | ENSG00000009765 | IYD          | -2.13 | 1.25E-20 |
| NEPTUNE | ENSG00000224417 | LOC105378138 | -2.13 | 1.60E-15 |
| NEPTUNE | ENSG00000183044 | ABAT         | -2.12 | 3.31E-20 |
| NEPTUNE | ENSG00000104327 | CALB1        | -2.12 | 2.77E-08 |
| NEPTUNE | ENSG00000181035 | SLC25A42     | -2.12 | 2.45E-20 |
| NEPTUNE | ENSG00000143630 | HCN3         | -2.11 | 7.22E-27 |
| NEPTUNE | ENSG00000228038 | VN1R51P      | -2.11 | 1.77E-17 |
| NEPTUNE | ENSG00000257894 | RP1_78O141   | -2.11 | 1.56E-16 |
| NEPTUNE | ENSG00000101445 | PPP1R16B     | -2.10 | 3.55E-15 |
| NEPTUNE | ENSG00000093217 | XYLB         | -2.10 | 3.45E-22 |
| NEPTUNE | ENSG00000245750 | DRAIC        | -2.09 | 7.67E-16 |
| NEPTUNE | ENSG00000124253 | PCK1         | -2.09 | 1.02E-08 |
| NEPTUNE | ENSG00000125255 | SLC10A2      | -2.08 | 8.25E-13 |
| NEPTUNE | ENSG00000166816 | LDHD         | -2.08 | 3.50E-23 |
| NEPTUNE | ENSG00000163145 | C1QTNF7      | -2.08 | 1.83E-16 |
| NEPTUNE | ENSG00000185100 | ADSS1        | -2.07 | 6.98E-21 |
| NEPTUNE | ENSG00000081051 | AFP          | -2.07 | 1.42E-14 |
| NEPTUNE | ENSG00000002746 | HECW1        | -2.07 | 4.87E-18 |
| NEPTUNE | ENSG00000169738 | DCXR         | -2.07 | 2.92E-26 |
| NEPTUNE | ENSG00000187017 | ESPN         | -2.07 | 5.13E-25 |
| NEPTUNE | ENSG00000151240 | DIP2C        | -2.07 | 9.22E-31 |
| NEPTUNE | ENSG00000250244 | CTB_49A34    | -2.07 | 1.12E-18 |
| NEPTUNE | ENSG00000224950 | RP5_1086K131 | -2.07 | 9.94E-22 |
| NEPTUNE | ENSG00000215231 | LINC01020    | -2.06 | 1.70E-15 |
| NEPTUNE | ENSG00000164120 | HPGD         | -2.06 | 3.35E-23 |
| NEPTUNE | ENSG00000253574 | LOC105375781 | -2.06 | 7.49E-26 |
| NEPTUNE | ENSG00000140284 | SLC27A2      | -2.06 | 1.53E-14 |
| NEPTUNE | ENSG00000266588 | RP1_56K135   | -2.06 | 1.52E-22 |
| NEPTUNE | ENSG00000148218 | ALAD         | -2.06 | 1.51E-27 |
| NEPTUNE | ENSG00000074276 | CDHR2        | -2.05 | 3.42E-13 |
| NEPTUNE | ENSG00000100433 | KCNK10       | -2.04 | 1.87E-13 |
| NEPTUNE | ENSG00000178828 | RNF186       | -2.04 | 2.76E-14 |
| NEPTUNE | ENSG00000162433 | AK4          | -2.03 | 2.44E-22 |
| NEPTUNE | ENSG00000008513 | ST3GAL1      | -2.03 | 8.07E-23 |
| NEPTUNE | ENSG00000172497 | ACOT12       | -2.03 | 6.18E-16 |
| NEPTUNE | ENSG00000132541 | RIDA         | -2.02 | 4.08E-28 |
| NEPTUNE | ENSG00000118004 | COLEC11      | -2.02 | 9.81E-21 |
| NEPTUNE | ENSG00000172367 | PDZD3        | -2.01 | 1.68E-18 |
| NEPTUNE | ENSG00000172594 | SMPDL3A      | -2.01 | 3.52E-26 |
| NEPTUNE | ENSG00000145217 | SLC26A1      | -2.01 | 6.05E-18 |
| NEPTUNE | ENSG00000166869 | CHP2         | -2.00 | 8.85E-08 |
| NEPTUNE | ENSG00000088926 | F11          | -2.00 | 1.14E-16 |
| NEPTUNE | ENSG00000198130 | HIBCH        | -2.00 | 2.46E-25 |

|         |                 |                          |       |          |
|---------|-----------------|--------------------------|-------|----------|
| NEPTUNE | ENSG00000173610 | UGT2A1                   | -2.00 | 1.51E-03 |
| NEPTUNE | ENSG00000162882 | HAAO                     | -2.00 | 9.78E-28 |
| NEPTUNE | ENSG00000167741 | GGT6                     | -2.00 | 4.44E-23 |
| NEPTUNE | ENSG00000166391 | MOGAT2                   | -1.99 | 3.98E-11 |
| NEPTUNE | ENSG00000159640 | ACE                      | -1.99 | 1.82E-10 |
| NEPTUNE | ENSG00000130377 | ACSBG2                   | -1.98 | 1.06E-18 |
| NEPTUNE | ENSG00000161653 | NAGS                     | -1.98 | 4.74E-22 |
| NEPTUNE | ENSG00000145362 | ANK2                     | -1.98 | 4.75E-10 |
| NEPTUNE | ENSG00000172425 | TTC36                    | -1.98 | 1.82E-23 |
| NEPTUNE | ENSG00000091137 | SLC26A4                  | -1.98 | 2.67E-05 |
| NEPTUNE | ENSG00000137274 | BPHL                     | -1.97 | 2.64E-31 |
| NEPTUNE | ENSG00000023839 | ABCC2                    | -1.97 | 3.69E-15 |
| NEPTUNE | ENSG00000167711 | SERPINF2                 | -1.97 | 1.12E-13 |
| NEPTUNE | ENSG00000249378 | LINC01060                | -1.97 | 8.80E-19 |
| NEPTUNE | ENSG00000130203 | APOE                     | -1.96 | 1.09E-07 |
| NEPTUNE | ENSG00000124214 | STAU1                    | -1.96 | 6.96E-27 |
| NEPTUNE | ENSG00000196177 | ACADSB                   | -1.96 | 1.94E-21 |
| NEPTUNE | ENSG00000170099 | SERPINA6                 | -1.96 | 5.29E-18 |
| NEPTUNE | ENSG00000240045 | STRIT1                   | -1.95 | 7.36E-09 |
| NEPTUNE | ENSG00000178772 | CPN2                     | -1.95 | 3.68E-07 |
| NEPTUNE | ENSG00000023171 | GRAMD1B                  | -1.95 | 1.60E-17 |
| NEPTUNE | ENSG00000113790 | EHHADH                   | -1.95 | 9.87E-23 |
| NEPTUNE | ENSG00000237674 | GSTA7P                   | -1.95 | 3.46E-24 |
| NEPTUNE | ENSG00000091262 | ABCC6                    | -1.95 | 6.21E-18 |
| NEPTUNE | ENSG00000164406 | LEAP2                    | -1.95 | 1.06E-10 |
| NEPTUNE | ENSG00000102886 | GDPD3                    | -1.94 | 1.40E-14 |
| NEPTUNE | ENSG00000179914 | ITLN1                    | -1.94 | 2.34E-04 |
| NEPTUNE | ENSG00000101444 | AHCY                     | -1.94 | 9.94E-27 |
| NEPTUNE | ENSG00000117600 | PLPPR4                   | -1.94 | 4.48E-15 |
| NEPTUNE | ENSG00000184022 | OR2T10                   | -1.94 | 6.27E-05 |
| NEPTUNE | ENSG00000183715 | OPCML                    | -1.94 | 1.34E-10 |
| NEPTUNE | ENSG00000167780 | SOAT2                    | -1.94 | 4.12E-09 |
| NEPTUNE | ENSG00000115255 | REEP6                    | -1.93 | 3.99E-19 |
| NEPTUNE | ENSG00000140519 | RHCG                     | -1.93 | 3.60E-08 |
| NEPTUNE | ENSG00000119121 | TRPM6                    | -1.93 | 2.10E-11 |
| NEPTUNE | ENSG00000144395 | CCDC150                  | -1.93 | 3.92E-20 |
| NEPTUNE | ENSG00000231210 | COMETT                   | -1.93 | 1.24E-19 |
| NEPTUNE | ENSG00000255274 | SMIM35                   | -1.93 | 2.96E-11 |
| NEPTUNE | ENSG00000186198 | SLC51B                   | -1.92 | 3.22E-19 |
| NEPTUNE | ENSG00000131781 | FMO5                     | -1.92 | 8.92E-12 |
| NEPTUNE | ENSG00000137860 | SLC28A2                  | -1.92 | 8.40E-08 |
| NEPTUNE | ENSG00000113739 | STC2                     | -1.92 | 1.58E-18 |
| NEPTUNE | ENSG00000143891 | GALM                     | -1.92 | 1.37E-29 |
| NEPTUNE | ENSG00000148057 | IDNK                     | -1.92 | 1.84E-26 |
| NEPTUNE | ENSG00000137561 | TTPA                     | -1.91 | 8.44E-17 |
| NEPTUNE | ENSG00000140199 | SLC12A6                  | -1.91 | 1.59E-22 |
| NEPTUNE | ENSG00000277196 | LOC102724788/PRODH       | -1.91 | 2.73E-08 |
| NEPTUNE | ENSG00000198010 | DLGAP2                   | -1.90 | 2.07E-14 |
| NEPTUNE | ENSG00000203995 | ZYG11A                   | -1.90 | 4.82E-20 |
| NEPTUNE | ENSG00000241119 | UGT1A9 (includes others) | -1.90 | 1.06E-06 |
| NEPTUNE | ENSG00000198814 | GK                       | -1.90 | 2.62E-13 |
| NEPTUNE | ENSG00000211445 | GPX3                     | -1.90 | 9.28E-14 |
| NEPTUNE | ENSG00000010932 | FMO1                     | -1.90 | 3.72E-10 |

|         |                 |                 |       |          |
|---------|-----------------|-----------------|-------|----------|
| NEPTUNE | ENSG00000216560 | LINC00955       | -1.89 | 3.52E-08 |
| NEPTUNE | ENSG00000155465 | SLC7A7          | -1.89 | 4.94E-15 |
| NEPTUNE | ENSG00000162461 | SLC25A34        | -1.89 | 1.62E-09 |
| NEPTUNE | ENSG00000148357 | HMCN2           | -1.88 | 5.39E-14 |
| NEPTUNE | ENSG00000204099 | NEU4            | -1.88 | 1.53E-03 |
| NEPTUNE | ENSG00000172782 | FADS6           | -1.88 | 5.49E-09 |
| NEPTUNE | ENSG00000079156 | OSBPL6          | -1.87 | 1.58E-18 |
| NEPTUNE | ENSG00000203799 | CCDC162P        | -1.86 | 6.75E-11 |
| NEPTUNE | ENSG00000167363 | FN3K            | -1.86 | 1.53E-13 |
| NEPTUNE | ENSG00000163328 | GPR155          | -1.85 | 1.25E-23 |
| NEPTUNE | ENSG00000157335 | CLEC18A/CLEC18C | -1.85 | 2.48E-07 |
| NEPTUNE | ENSG00000163581 | SLC2A2          | -1.84 | 3.78E-09 |
| NEPTUNE | ENSG00000143416 | SELENBP1        | -1.84 | 1.14E-25 |
| NEPTUNE | ENSG00000180769 | WDFY3-AS2       | -1.84 | 1.95E-25 |
| NEPTUNE | ENSG00000240935 | PLGLA           | -1.84 | 2.20E-12 |
| NEPTUNE | ENSG00000076258 | FMO4            | -1.84 | 7.94E-14 |
| NEPTUNE | ENSG00000251377 | LOC105377490    | -1.84 | 2.66E-19 |
| NEPTUNE | ENSG00000175445 | LPL             | -1.83 | 4.69E-07 |
| NEPTUNE | ENSG00000182156 | ENPP7           | -1.83 | 2.89E-09 |
| NEPTUNE | ENSG00000213373 | LINC00671       | -1.83 | 4.73E-17 |
| NEPTUNE | ENSG00000162482 | AKR7A3          | -1.83 | 6.91E-12 |
| NEPTUNE | ENSG00000250885 | LINC02061       | -1.83 | 1.30E-15 |
| NEPTUNE | ENSG00000009950 | MLXIPL          | -1.82 | 3.96E-14 |
| NEPTUNE | ENSG00000225697 | SLC26A6         | -1.82 | 2.38E-15 |
| NEPTUNE | ENSG00000187097 | ENTPD5          | -1.82 | 1.04E-17 |
| NEPTUNE | ENSG00000184672 | RALYL           | -1.82 | 3.81E-16 |
| NEPTUNE | ENSG00000138413 | IDH1            | -1.82 | 6.28E-23 |
| NEPTUNE | ENSG00000152782 | PANK1           | -1.82 | 2.40E-18 |
| NEPTUNE | ENSG00000164749 | HNF4G           | -1.82 | 6.94E-12 |
| NEPTUNE | ENSG00000167994 | RAB3IL1         | -1.81 | 3.76E-16 |
| NEPTUNE | ENSG00000181997 | AQP7P2          | -1.81 | 5.23E-10 |
| NEPTUNE | ENSG00000101447 | FAM83D          | -1.81 | 4.56E-10 |
| NEPTUNE | ENSG00000133116 | KL              | -1.81 | 7.97E-11 |
| NEPTUNE | ENSG00000262995 | LOC105371119    | -1.81 | 2.71E-13 |
| NEPTUNE | ENSG00000254717 | GLYATL1P2       | -1.81 | 4.87E-04 |
| NEPTUNE | ENSG00000223716 | RP11_113O243    | -1.81 | 3.43E-20 |
| NEPTUNE | ENSG00000134240 | HMGCS2          | -1.80 | 1.31E-05 |
| NEPTUNE | ENSG00000178462 | TUBAL3          | -1.80 | 6.28E-16 |
| NEPTUNE | ENSG00000108479 | GALK1           | -1.80 | 6.01E-24 |
| NEPTUNE | ENSG00000187630 | DHRS4L2         | -1.80 | 2.92E-09 |
| NEPTUNE | ENSG00000075673 | ATP12A          | -1.80 | 2.08E-05 |
| NEPTUNE | ENSG00000205669 | ACOT6           | -1.80 | 2.45E-17 |
| NEPTUNE | ENSG00000261812 | TUBB8P7         | -1.80 | 9.17E-15 |
| NEPTUNE | ENSG00000173237 | C11orf86        | -1.80 | 5.26E-13 |
| NEPTUNE | ENSG00000236136 | ADORA2BP1       | -1.80 | 1.30E-12 |
| NEPTUNE | ENSG00000183048 | SLC25A10        | -1.80 | 8.32E-20 |
| NEPTUNE | ENSG00000148123 | PLPPR1          | -1.80 | 7.73E-12 |
| NEPTUNE | ENSG00000171914 | TLN2            | -1.79 | 2.92E-17 |
| NEPTUNE | ENSG00000133401 | PDZD2           | -1.79 | 1.64E-17 |
| NEPTUNE | ENSG00000113389 | NPR3            | -1.79 | 6.04E-14 |
| NEPTUNE | ENSG00000112394 | SLC16A10        | -1.79 | 7.85E-15 |
| NEPTUNE | ENSG00000157326 | DHRS4           | -1.79 | 4.10E-12 |
| NEPTUNE | ENSG00000103316 | CRYM            | -1.79 | 6.13E-16 |



|         |                 |                            |       |          |
|---------|-----------------|----------------------------|-------|----------|
| NEPTUNE | ENSG00000076382 | SPAG5                      | -1.78 | 4.25E-15 |
| NEPTUNE | ENSG00000163959 | SLC51A                     | -1.78 | 3.44E-18 |
| NEPTUNE | ENSG00000198398 | TMEM207                    | -1.78 | 6.89E-08 |
| NEPTUNE | ENSG00000105607 | GCDH                       | -1.78 | 3.66E-17 |
| NEPTUNE | ENSG00000214376 | VSTM5                      | -1.78 | 7.52E-11 |
| NEPTUNE | ENSG00000213963 | LOC100130691               | -1.77 | 1.17E-06 |
| NEPTUNE | ENSG00000112964 | GHR                        | -1.77 | 1.76E-15 |
| NEPTUNE | ENSG00000108018 | SORCS1                     | -1.77 | 4.15E-04 |
| NEPTUNE | ENSG00000135069 | PSAT1                      | -1.77 | 1.14E-10 |
| NEPTUNE | ENSG00000175538 | KCNE3                      | -1.76 | 1.17E-19 |
| NEPTUNE | ENSG00000178821 | TMEM52                     | -1.76 | 1.52E-15 |
| NEPTUNE | ENSG00000248211 | TRPC7-AS1                  | -1.76 | 6.08E-18 |
| NEPTUNE | ENSG00000150656 | CNDP1                      | -1.76 | 1.39E-14 |
| NEPTUNE | ENSG00000138207 | RBP4                       | -1.75 | 1.88E-02 |
| NEPTUNE | ENSG00000113318 | MSH3                       | -1.75 | 2.96E-25 |
| NEPTUNE | ENSG00000170180 | GYPA                       | -1.75 | 5.66E-18 |
| NEPTUNE | ENSG00000260201 | LOC105371120               | -1.75 | 5.78E-13 |
| NEPTUNE | ENSG00000083067 | TRPM3                      | -1.75 | 2.55E-15 |
| NEPTUNE | ENSG00000228376 | GAS2L1P2                   | -1.74 | 3.21E-15 |
| NEPTUNE | ENSG00000145147 | SLIT2                      | -1.74 | 5.60E-13 |
| NEPTUNE | ENSG00000135476 | ESPL1                      | -1.74 | 6.19E-09 |
| NEPTUNE | ENSG00000105784 | RUNDC3B                    | -1.74 | 4.88E-18 |
| NEPTUNE | ENSG00000127831 | VIL1                       | -1.74 | 4.48E-09 |
| NEPTUNE | ENSG00000165973 | NELL1                      | -1.74 | 6.94E-10 |
| NEPTUNE | ENSG00000237153 | RP11_132E112               | -1.74 | 4.93E-08 |
| NEPTUNE | ENSG00000099194 | SCD                        | -1.74 | 1.36E-08 |
| NEPTUNE | ENSG00000264569 | DCXR-DT                    | -1.74 | 4.68E-20 |
| NEPTUNE | ENSG00000166402 | TUB                        | -1.74 | 6.03E-14 |
| NEPTUNE | ENSG00000255319 | ENPP7P8                    | -1.74 | 4.96E-16 |
| NEPTUNE | ENSG00000165899 | OTOGL                      | -1.73 | 1.16E-03 |
| NEPTUNE | ENSG00000157680 | DGKI                       | -1.73 | 3.33E-07 |
| NEPTUNE | ENSG00000143845 | ETNK2                      | -1.73 | 3.85E-13 |
| NEPTUNE | ENSG00000145088 | EAF2                       | -1.73 | 7.21E-18 |
| NEPTUNE | ENSG00000100362 | PVALB                      | -1.73 | 4.91E-07 |
| NEPTUNE | ENSG00000259347 | RP11_798K32                | -1.73 | 1.74E-16 |
| NEPTUNE | ENSG00000117791 | MTARC2                     | -1.73 | 1.10E-12 |
| NEPTUNE | ENSG00000281655 | RP11-817J15.3              | -1.73 | 2.66E-03 |
| NEPTUNE | ENSG00000102575 | ACP5                       | -1.73 | 6.93E-13 |
| NEPTUNE | ENSG00000278967 | RP5_849H193                | -1.72 | 2.47E-15 |
| NEPTUNE | ENSG00000072682 | P4HA2                      | -1.72 | 2.09E-16 |
| NEPTUNE | ENSG00000176809 | LRRC37A3 (includes others) | -1.72 | 7.32E-16 |
| NEPTUNE | ENSG00000094631 | HDAC6                      | -1.72 | 2.65E-14 |
| NEPTUNE | ENSG00000176641 | RNF152                     | -1.72 | 1.85E-11 |
| NEPTUNE | ENSG00000146166 | LGSN                       | -1.72 | 1.63E-06 |
| NEPTUNE | ENSG00000012171 | SEMA3B                     | -1.72 | 8.62E-11 |
| NEPTUNE | ENSG00000159423 | ALDH4A1                    | -1.71 | 2.18E-12 |
| NEPTUNE | ENSG00000264589 | MAPT-AS1                   | -1.71 | 5.30E-12 |
| NEPTUNE | ENSG00000278058 | RP11_70D242                | -1.71 | 1.32E-16 |
| NEPTUNE | ENSG00000167074 | TEF                        | -1.71 | 5.23E-07 |
| NEPTUNE | ENSG00000145949 | MYLK4                      | -1.71 | 2.50E-11 |
| NEPTUNE | ENSG00000122729 | ACO1                       | -1.70 | 3.37E-13 |
| NEPTUNE | ENSG00000224093 | BCAR3-AS1                  | -1.70 | 5.98E-18 |
| NEPTUNE | ENSG00000263535 | AK4P1                      | -1.70 | 4.11E-04 |

|         |                 |              |       |          |
|---------|-----------------|--------------|-------|----------|
| NEPTUNE | ENSG00000180902 | D2HGDH       | -1.70 | 3.50E-13 |
| NEPTUNE | ENSG00000227244 | LINC00845    | -1.70 | 3.32E-20 |
| NEPTUNE | ENSG00000258084 | RP11_754N211 | -1.69 | 1.68E-19 |
| NEPTUNE | ENSG00000137106 | GRHPR        | -1.69 | 3.16E-20 |
| NEPTUNE | ENSG00000161270 | NPHS1        | -1.69 | 3.97E-04 |
| NEPTUNE | ENSG00000261804 | LOC102723373 | -1.69 | 1.57E-16 |
| NEPTUNE | ENSG00000225376 | TMEM246-AS1  | -1.69 | 1.19E-10 |
| NEPTUNE | ENSG00000165633 | VSTM4        | -1.69 | 6.94E-13 |
| NEPTUNE | ENSG00000140675 | SLC5A2       | -1.69 | 2.74E-05 |
| NEPTUNE | ENSG00000234647 | LOC101929420 | -1.68 | 1.03E-15 |
| NEPTUNE | ENSG00000197114 | ZGPAT        | -1.68 | 3.71E-22 |
| NEPTUNE | ENSG00000163050 | COQ8A        | -1.68 | 2.55E-14 |
| NEPTUNE | ENSG00000137266 | SLC22A23     | -1.68 | 8.80E-10 |
| NEPTUNE | ENSG00000128268 | MGAT3        | -1.68 | 1.59E-14 |
| NEPTUNE | ENSG00000185046 | ANKS1B       | -1.68 | 8.36E-14 |
| NEPTUNE | ENSG00000145703 | IQGAP2       | -1.67 | 4.49E-19 |
| NEPTUNE | ENSG00000171132 | PRKCE        | -1.67 | 1.32E-15 |
| NEPTUNE | ENSG00000072210 | ALDH3A2      | -1.67 | 1.20E-20 |
| NEPTUNE | ENSG00000229639 | LINC01758    | -1.67 | 2.12E-15 |
| NEPTUNE | ENSG00000135838 | NPL          | -1.67 | 1.37E-09 |
| NEPTUNE | ENSG00000241224 | C3orf85      | -1.66 | 1.45E-09 |
| NEPTUNE | ENSG00000142661 | MYOM3        | -1.66 | 1.32E-05 |
| NEPTUNE | ENSG00000111012 | CYP27B1      | -1.66 | 1.30E-04 |
| NEPTUNE | ENSG00000271824 | SMIM32       | -1.66 | 2.50E-08 |
| NEPTUNE | ENSG00000274317 | LINC02334    | -1.66 | 1.33E-05 |
| NEPTUNE | ENSG00000204613 | TRIM10       | -1.66 | 6.00E-13 |
| NEPTUNE | ENSG00000164309 | CMYA5        | -1.66 | 2.63E-09 |
| NEPTUNE | ENSG00000205488 | CALML3-AS1   | -1.66 | 5.02E-10 |
| NEPTUNE | ENSG00000004939 | SLC4A1       | -1.66 | 8.57E-06 |
| NEPTUNE | ENSG00000099864 | PALM         | -1.66 | 1.65E-13 |
| NEPTUNE | ENSG00000158874 | APOA2        | -1.66 | 1.20E-05 |
| NEPTUNE | ENSG00000016391 | CHDH         | -1.65 | 1.13E-11 |
| NEPTUNE | ENSG00000243083 | LINC00870    | -1.65 | 4.13E-15 |
| NEPTUNE | ENSG00000170835 | CEL          | -1.65 | 2.82E-06 |
| NEPTUNE | ENSG00000144115 | THNSL2       | -1.65 | 6.64E-05 |
| NEPTUNE | ENSG00000066827 | ZFAT         | -1.65 | 6.32E-12 |
| NEPTUNE | ENSG00000134323 | MYCN         | -1.65 | 1.09E-05 |
| NEPTUNE | ENSG00000254126 | CD8B2        | -1.65 | 1.53E-05 |
| NEPTUNE | ENSG00000113073 | SLC4A9       | -1.65 | 9.35E-07 |
| NEPTUNE | ENSG00000254416 | LINC02732    | -1.65 | 9.15E-09 |
| NEPTUNE | ENSG00000101405 | OXT          | -1.64 | 3.71E-08 |
| NEPTUNE | ENSG00000253300 | RP11_108E141 | -1.64 | 2.46E-08 |
| NEPTUNE | ENSG00000166415 | WDR72        | -1.64 | 9.05E-16 |
| NEPTUNE | ENSG00000254211 | LINC01485    | -1.64 | 1.02E-06 |
| NEPTUNE | ENSG00000133315 | MACROD1      | -1.64 | 6.07E-11 |
| NEPTUNE | ENSG00000213612 | FAM220CP     | -1.64 | 3.23E-14 |
| NEPTUNE | ENSG00000105516 | DBP          | -1.64 | 3.45E-05 |
| NEPTUNE | ENSG00000253888 | LOC105379340 | -1.64 | 6.45E-10 |
| NEPTUNE | ENSG00000173848 | NET1         | -1.64 | 2.78E-14 |
| NEPTUNE | ENSG00000114120 | SLC25A36     | -1.63 | 5.71E-20 |
| NEPTUNE | ENSG00000236581 | STARD13-AS   | -1.63 | 7.58E-17 |
| NEPTUNE | ENSG00000181192 | DHTKD1       | -1.63 | 3.60E-15 |
| NEPTUNE | ENSG00000176225 | RTTN         | -1.63 | 6.14E-16 |

|         |                 |                    |       |          |
|---------|-----------------|--------------------|-------|----------|
| NEPTUNE | ENSG00000069424 | KCNAB2             | -1.63 | 8.58E-10 |
| NEPTUNE | ENSG00000130234 | ACE2               | -1.63 | 5.45E-06 |
| NEPTUNE | ENSG00000103269 | RHBDL1             | -1.62 | 1.31E-14 |
| NEPTUNE | ENSG00000227543 | SPAG5-AS1          | -1.62 | 1.41E-13 |
| NEPTUNE | ENSG00000112715 | VEGFA              | -1.62 | 1.54E-09 |
| NEPTUNE | ENSG00000128165 | ADM2               | -1.62 | 1.92E-08 |
| NEPTUNE | ENSG00000075651 | PLD1               | -1.62 | 8.74E-13 |
| NEPTUNE | ENSG00000124491 | F13A1              | -1.62 | 1.10E-04 |
| NEPTUNE | ENSG00000259479 | SORD2P             | -1.62 | 8.02E-04 |
| NEPTUNE | ENSG00000244738 | RP11_373E163       | -1.62 | 4.79E-08 |
| NEPTUNE | ENSG00000100600 | LGMN               | -1.61 | 2.54E-07 |
| NEPTUNE | ENSG00000125144 | MT1G               | -1.61 | 5.09E-03 |
| NEPTUNE | ENSG00000008311 | AASS               | -1.61 | 1.13E-08 |
| NEPTUNE | ENSG00000188338 | SLC38A3            | -1.61 | 1.11E-04 |
| NEPTUNE | ENSG00000144847 | IGSF11             | -1.61 | 3.42E-11 |
| NEPTUNE | ENSG00000146755 | TRIM50             | -1.61 | 1.97E-08 |
| NEPTUNE | ENSG00000154269 | ENPP3              | -1.61 | 6.53E-08 |
| NEPTUNE | ENSG00000113889 | KNG1               | -1.61 | 2.90E-07 |
| NEPTUNE | ENSG00000264404 | LINC02675          | -1.61 | 2.79E-08 |
| NEPTUNE | ENSG00000225457 | RP11_736E31        | -1.61 | 2.16E-11 |
| NEPTUNE | ENSG00000204978 | ERICH4             | -1.61 | 3.30E-08 |
| NEPTUNE | ENSG00000162148 | PPP1R32            | -1.61 | 3.16E-20 |
| NEPTUNE | ENSG00000150893 | FREM2              | -1.60 | 4.81E-12 |
| NEPTUNE | ENSG00000113100 | CDH9               | -1.60 | 1.53E-09 |
| NEPTUNE | ENSG00000112782 | CLIC5              | -1.60 | 2.36E-03 |
| NEPTUNE | ENSG00000133020 | MYH8               | -1.60 | 4.88E-02 |
| NEPTUNE | ENSG00000160202 | CRYAA/LOC102724652 | -1.59 | 2.12E-03 |
| NEPTUNE | ENSG00000156968 | MPV17L             | -1.59 | 2.55E-11 |
| NEPTUNE | ENSG00000101230 | ISM1               | -1.59 | 1.49E-11 |
| NEPTUNE | ENSG00000136267 | DGKB               | -1.59 | 2.02E-08 |
| NEPTUNE | ENSG00000108515 | ENO3               | -1.58 | 1.04E-12 |
| NEPTUNE | ENSG00000157303 | SUSD3              | -1.58 | 4.83E-11 |
| NEPTUNE | ENSG00000204511 | MCCD1              | -1.58 | 1.76E-05 |
| NEPTUNE | ENSG00000107186 | MPDZ               | -1.58 | 3.47E-11 |
| NEPTUNE | ENSG00000173531 | MST1               | -1.58 | 4.57E-07 |
| NEPTUNE | ENSG00000165694 | FRMD7              | -1.58 | 1.44E-06 |
| NEPTUNE | ENSG00000118137 | APOA1              | -1.57 | 1.35E-06 |
| NEPTUNE | ENSG00000197658 | SLC22A24           | -1.57 | 4.05E-04 |
| NEPTUNE | ENSG00000109576 | AADAT              | -1.57 | 2.20E-10 |
| NEPTUNE | ENSG00000259319 | JDP2-AS1           | -1.57 | 1.65E-12 |
| NEPTUNE | ENSG00000169504 | CLIC4              | -1.57 | 1.95E-09 |
| NEPTUNE | ENSG00000257845 | LINC02294          | -1.57 | 9.05E-07 |
| NEPTUNE | ENSG00000120913 | PDLIM2             | -1.57 | 2.44E-14 |
| NEPTUNE | ENSG00000222019 | URAHP              | -1.57 | 1.34E-17 |
| NEPTUNE | ENSG00000183077 | AFMID              | -1.57 | 2.95E-09 |
| NEPTUNE | ENSG00000178146 | RP1_232L22__B1     | -1.56 | 2.58E-09 |
| NEPTUNE | ENSG00000141485 | SLC13A5            | -1.56 | 2.63E-02 |
| NEPTUNE | ENSG00000205358 | MT1H               | -1.56 | 3.96E-02 |
| NEPTUNE | ENSG00000154096 | THY1               | -1.56 | 1.28E-06 |
| NEPTUNE | ENSG00000058091 | CDK14              | -1.56 | 3.63E-14 |
| NEPTUNE | ENSG00000186815 | TPCN1              | -1.56 | 2.01E-11 |
| NEPTUNE | ENSG00000077585 | GPR137B            | -1.56 | 1.86E-11 |
| NEPTUNE | ENSG00000167941 | SOST               | -1.56 | 4.32E-03 |

|         |                 |                |       |          |
|---------|-----------------|----------------|-------|----------|
| NEPTUNE | ENSG00000146021 | KLHL3          | -1.56 | 6.64E-06 |
| NEPTUNE | ENSG00000113742 | CPEB4          | -1.56 | 1.55E-13 |
| NEPTUNE | ENSG00000248747 | RP11_586L231   | -1.55 | 2.45E-08 |
| NEPTUNE | ENSG00000162817 | C1orf115       | -1.55 | 4.16E-09 |
| NEPTUNE | ENSG00000277737 | FP3253171      | -1.55 | 7.63E-05 |
| NEPTUNE | ENSG00000156535 | CD109          | -1.55 | 9.44E-09 |
| NEPTUNE | ENSG00000069018 | TRPC7          | -1.55 | 2.68E-04 |
| NEPTUNE | ENSG00000176894 | PXMP2          | -1.55 | 6.91E-11 |
| NEPTUNE | ENSG00000165868 | HSPA12A        | -1.54 | 6.15E-11 |
| NEPTUNE | ENSG00000250378 | LOC107986453   | -1.54 | 4.38E-11 |
| NEPTUNE | ENSG00000187546 | AGMO           | -1.54 | 1.97E-10 |
| NEPTUNE | ENSG00000158109 | TPRG1L         | -1.54 | 2.08E-13 |
| NEPTUNE | ENSG00000233198 | RNF224         | -1.54 | 5.53E-13 |
| NEPTUNE | ENSG00000082397 | EPB41L3        | -1.54 | 1.64E-08 |
| NEPTUNE | ENSG00000250358 | LINC02200      | -1.54 | 1.55E-12 |
| NEPTUNE | ENSG00000146411 | SLC2A12        | -1.54 | 5.35E-08 |
| NEPTUNE | ENSG00000255182 | CTD_2517M2214  | -1.54 | 1.25E-07 |
| NEPTUNE | ENSG00000164283 | ESM1           | -1.53 | 2.03E-07 |
| NEPTUNE | ENSG00000140839 | CLEC18B        | -1.53 | 1.29E-08 |
| NEPTUNE | ENSG00000260963 | LOC105371264   | -1.53 | 1.60E-09 |
| NEPTUNE | ENSG00000166123 | GPT2           | -1.53 | 2.54E-07 |
| NEPTUNE | ENSG00000134207 | SYT6           | -1.53 | 1.66E-08 |
| NEPTUNE | ENSG00000166126 | AMN            | -1.53 | 5.37E-03 |
| NEPTUNE | ENSG00000262445 | CTD_2545H12    | -1.53 | 1.24E-13 |
| NEPTUNE | ENSG00000253598 | SLC10A5        | -1.53 | 6.05E-15 |
| NEPTUNE | ENSG00000214102 | WEE2           | -1.53 | 5.06E-17 |
| NEPTUNE | ENSG00000246022 | ALDH1L1-AS2    | -1.53 | 5.76E-11 |
| NEPTUNE | ENSG00000069702 | TGFBR3         | -1.53 | 1.82E-10 |
| NEPTUNE | ENSG00000214888 | XXYAC_YM21GA27 | -1.53 | 8.04E-07 |
| NEPTUNE | ENSG00000130227 | XPO7           | -1.53 | 2.37E-12 |
| NEPTUNE | ENSG00000235947 | EGOT           | -1.53 | 8.32E-12 |
| NEPTUNE | ENSG00000188816 | HMX2           | -1.52 | 1.91E-05 |
| NEPTUNE | ENSG00000072657 | TRHDE          | -1.52 | 3.17E-10 |
| NEPTUNE | ENSG00000241233 | KRTAP5-8       | -1.52 | 3.48E-08 |
| NEPTUNE | ENSG00000234452 | SLC16A12-AS1   | -1.52 | 2.90E-11 |
| NEPTUNE | ENSG00000036672 | USP2           | -1.52 | 3.76E-06 |
| NEPTUNE | ENSG00000238099 | LINC01625      | -1.52 | 9.82E-13 |
| NEPTUNE | ENSG00000271952 | LINC01954      | -1.52 | 6.42E-12 |
| NEPTUNE | ENSG00000198829 | SUCNR1         | -1.52 | 4.94E-06 |
| NEPTUNE | ENSG00000147804 | SLC39A4        | -1.52 | 1.10E-11 |
| NEPTUNE | ENSG00000182901 | RGS7           | -1.51 | 6.48E-07 |
| NEPTUNE | ENSG00000101311 | FERMT1         | -1.51 | 7.91E-06 |
| NEPTUNE | ENSG00000246695 | RASSF8-AS1     | -1.51 | 1.52E-11 |
| NEPTUNE | ENSG00000128242 | GAL3ST1        | -1.51 | 4.73E-08 |
| NEPTUNE | ENSG00000125675 | GRIA3          | -1.51 | 9.81E-08 |
| NEPTUNE | ENSG00000125520 | SLC2A4RG       | -1.51 | 4.52E-11 |
| NEPTUNE | ENSG00000242612 | DECR2          | -1.51 | 2.23E-10 |
| NEPTUNE | ENSG00000042832 | TG             | -1.51 | 1.82E-07 |
| NEPTUNE | ENSG00000184227 | ACOT1          | -1.51 | 2.67E-06 |
| NEPTUNE | ENSG00000235200 | LINC01702      | -1.50 | 8.53E-07 |
| NEPTUNE | ENSG00000166426 | CRABP1         | -1.50 | 1.43E-07 |
| NEPTUNE | ENSG00000260457 | RP11_723G81    | -1.50 | 3.28E-04 |
| NEPTUNE | ENSG00000135447 | PPP1R1A        | 1.50  | 4.79E-04 |

|         |                 |          |      |          |
|---------|-----------------|----------|------|----------|
| NEPTUNE | ENSG00000197959 | DNM3     | 1.50 | 8.10E-10 |
| NEPTUNE | ENSG00000060656 | PTPRU    | 1.50 | 9.60E-06 |
| NEPTUNE | ENSG00000276180 | H4C9     | 1.50 | 9.46E-11 |
| NEPTUNE | ENSG00000165757 | JCAD     | 1.50 | 2.96E-09 |
| NEPTUNE | ENSG00000171408 | PDE7B    | 1.50 | 1.60E-08 |
| NEPTUNE | ENSG00000144834 | TAGLN3   | 1.50 | 9.07E-05 |
| NEPTUNE | ENSG00000169105 | CHST14   | 1.50 | 4.31E-13 |
| NEPTUNE | ENSG00000123473 | STIL     | 1.50 | 2.76E-08 |
| NEPTUNE | ENSG00000196814 | MVB12B   | 1.50 | 2.13E-11 |
| NEPTUNE | ENSG00000101596 | SMCHD1   | 1.50 | 6.93E-12 |
| NEPTUNE | ENSG00000154102 | C16orf74 | 1.51 | 1.00E-13 |
| NEPTUNE | ENSG00000151023 | ENKUR    | 1.51 | 1.63E-15 |
| NEPTUNE | ENSG00000033100 | CHPF2    | 1.51 | 2.10E-09 |
| NEPTUNE | ENSG00000134138 | MEIS2    | 1.51 | 1.66E-08 |
| NEPTUNE | ENSG00000181274 | FRAT2    | 1.51 | 1.37E-03 |
| NEPTUNE | ENSG00000143514 | TP53BP2  | 1.51 | 1.07E-10 |
| NEPTUNE | ENSG00000064932 | SBNO2    | 1.51 | 3.73E-13 |
| NEPTUNE | ENSG00000108107 | RPL28    | 1.51 | 3.23E-14 |
| NEPTUNE | ENSG00000157350 | ST3GAL2  | 1.51 | 1.42E-06 |
| NEPTUNE | ENSG00000146904 | EPHA1    | 1.51 | 2.11E-10 |
| NEPTUNE | ENSG00000116396 | KCNC4    | 1.51 | 7.24E-09 |
| NEPTUNE | ENSG00000259956 | RBM15B   | 1.51 | 1.78E-03 |
| NEPTUNE | ENSG00000242779 | ZNF702P  | 1.51 | 2.45E-08 |
| NEPTUNE | ENSG00000004799 | PDK4     | 1.51 | 2.19E-03 |
| NEPTUNE | ENSG00000165490 | DDIAS    | 1.51 | 3.35E-13 |
| NEPTUNE | ENSG00000081818 | PCDHB4   | 1.51 | 1.08E-09 |
| NEPTUNE | ENSG00000183856 | IQGAP3   | 1.51 | 1.28E-09 |
| NEPTUNE | ENSG00000101384 | JAG1     | 1.51 | 2.99E-07 |
| NEPTUNE | ENSG0000012048  | BRCA1    | 1.51 | 1.47E-10 |
| NEPTUNE | ENSG00000127946 | HIP1     | 1.51 | 7.24E-11 |
| NEPTUNE | ENSG00000123358 | NR4A1    | 1.51 | 9.44E-04 |
| NEPTUNE | ENSG00000143196 | DPT      | 1.51 | 9.12E-04 |
| NEPTUNE | ENSG00000082781 | ITGB5    | 1.51 | 8.14E-05 |
| NEPTUNE | ENSG00000174718 | RESF1    | 1.51 | 7.22E-11 |
| NEPTUNE | ENSG00000145103 | ILDR1    | 1.51 | 1.73E-12 |
| NEPTUNE | ENSG00000121207 | LRAT     | 1.51 | 8.67E-10 |
| NEPTUNE | ENSG00000165105 | RASEF    | 1.52 | 6.64E-11 |
| NEPTUNE | ENSG00000204967 | PCDHA4   | 1.52 | 2.89E-14 |
| NEPTUNE | ENSG00000234741 | GAS5     | 1.52 | 2.39E-11 |
| NEPTUNE | ENSG00000123684 | LPGAT1   | 1.52 | 1.63E-12 |
| NEPTUNE | ENSG00000197536 | IRF1-AS1 | 1.52 | 8.08E-14 |
| NEPTUNE | ENSG00000138738 | PRDM5    | 1.52 | 8.85E-12 |
| NEPTUNE | ENSG00000174705 | SH3PXD2B | 1.52 | 5.64E-13 |
| NEPTUNE | ENSG00000172354 | GNB2     | 1.52 | 1.03E-09 |
| NEPTUNE | ENSG00000104413 | ESRP1    | 1.52 | 1.17E-10 |
| NEPTUNE | ENSG00000189184 | PCDH18   | 1.52 | 4.32E-06 |
| NEPTUNE | ENSG00000168497 | CAVIN2   | 1.52 | 3.53E-10 |
| NEPTUNE | ENSG00000171033 | PKIA     | 1.52 | 3.20E-06 |
| NEPTUNE | ENSG00000102996 | MMP15    | 1.52 | 1.06E-13 |
| NEPTUNE | ENSG00000189292 | ALKAL2   | 1.52 | 2.79E-02 |
| NEPTUNE | ENSG00000115355 | CCDC88A  | 1.52 | 4.95E-13 |
| NEPTUNE | ENSG00000188707 | ZBED10P  | 1.52 | 5.75E-08 |
| NEPTUNE | ENSG00000117016 | RIMS3    | 1.52 | 1.80E-12 |

|         |                 |          |      |          |
|---------|-----------------|----------|------|----------|
| NEPTUNE | ENSG00000239521 | CASTOR3  | 1.52 | 9.07E-08 |
| NEPTUNE | ENSG00000162430 | SELENON  | 1.52 | 1.19E-06 |
| NEPTUNE | ENSG00000185112 | FAM43A   | 1.52 | 4.41E-06 |
| NEPTUNE | ENSG00000167183 | PRR15L   | 1.52 | 7.19E-11 |
| NEPTUNE | ENSG00000130768 | SMPDL3B  | 1.52 | 2.00E-10 |
| NEPTUNE | ENSG00000198734 | F5       | 1.52 | 1.53E-06 |
| NEPTUNE | ENSG00000100505 | TRIM9    | 1.52 | 1.74E-13 |
| NEPTUNE | ENSG00000162946 | DISC1    | 1.52 | 4.24E-15 |
| NEPTUNE | ENSG00000174125 | TLR1     | 1.53 | 2.00E-10 |
| NEPTUNE | ENSG00000236609 | ZNF853   | 1.53 | 2.08E-07 |
| NEPTUNE | ENSG00000101003 | GIN51    | 1.53 | 2.44E-11 |
| NEPTUNE | ENSG00000042493 | CAPG     | 1.53 | 2.15E-12 |
| NEPTUNE | ENSG00000115526 | CHST10   | 1.53 | 9.53E-13 |
| NEPTUNE | ENSG00000102362 | SYTL4    | 1.53 | 3.05E-09 |
| NEPTUNE | ENSG00000164129 | NPY5R    | 1.53 | 1.99E-11 |
| NEPTUNE | ENSG00000112414 | ADGRG6   | 1.53 | 1.52E-08 |
| NEPTUNE | ENSG00000123119 | NECAB1   | 1.53 | 2.68E-09 |
| NEPTUNE | ENSG00000114770 | ABCC5    | 1.53 | 2.75E-15 |
| NEPTUNE | ENSG00000118407 | FILIP1   | 1.53 | 7.16E-11 |
| NEPTUNE | ENSG00000143384 | MCL1     | 1.53 | 4.49E-12 |
| NEPTUNE | ENSG00000169991 | IFFO2    | 1.53 | 5.76E-14 |
| NEPTUNE | ENSG00000131196 | NFATC1   | 1.53 | 2.62E-11 |
| NEPTUNE | ENSG00000164794 | KCNV1    | 1.53 | 3.01E-11 |
| NEPTUNE | ENSG00000137628 | DDX60    | 1.53 | 2.22E-08 |
| NEPTUNE | ENSG00000006747 | SCIN     | 1.53 | 3.12E-08 |
| NEPTUNE | ENSG00000100503 | NIN      | 1.53 | 2.42E-11 |
| NEPTUNE | ENSG00000005249 | PRKAR2B  | 1.53 | 6.11E-06 |
| NEPTUNE | ENSG00000090924 | PLEKHG2  | 1.53 | 4.19E-13 |
| NEPTUNE | ENSG00000128833 | MYO5C    | 1.53 | 6.36E-11 |
| NEPTUNE | ENSG00000122707 | RECK     | 1.53 | 1.25E-11 |
| NEPTUNE | ENSG00000118507 | AKAP7    | 1.53 | 6.48E-14 |
| NEPTUNE | ENSG00000168010 | ATG16L2  | 1.53 | 1.38E-12 |
| NEPTUNE | ENSG00000046651 | OFD1     | 1.53 | 3.06E-18 |
| NEPTUNE | ENSG00000196247 | ZNF107   | 1.53 | 3.76E-11 |
| NEPTUNE | ENSG00000106066 | CPVL     | 1.53 | 1.87E-12 |
| NEPTUNE | ENSG00000107833 | NPM3     | 1.53 | 3.61E-14 |
| NEPTUNE | ENSG00000107249 | GLIS3    | 1.53 | 1.25E-14 |
| NEPTUNE | ENSG00000149596 | JPH2     | 1.53 | 2.32E-15 |
| NEPTUNE | ENSG00000144668 | ITGA9    | 1.53 | 3.92E-09 |
| NEPTUNE | ENSG00000276045 | ORAI1    | 1.53 | 6.85E-07 |
| NEPTUNE | ENSG00000117139 | KDM5B    | 1.53 | 2.28E-14 |
| NEPTUNE | ENSG00000078269 | SYNJ2    | 1.53 | 4.01E-11 |
| NEPTUNE | ENSG00000169855 | ROBO1    | 1.53 | 3.18E-10 |
| NEPTUNE | ENSG00000134686 | PHC2     | 1.53 | 1.63E-03 |
| NEPTUNE | ENSG00000164506 | STXBP5   | 1.54 | 1.38E-10 |
| NEPTUNE | ENSG00000196396 | PTPN1    | 1.54 | 5.72E-13 |
| NEPTUNE | ENSG00000137845 | ADAM10   | 1.54 | 1.83E-11 |
| NEPTUNE | ENSG00000229391 | HLA-DRB6 | 1.54 | 1.79E-05 |
| NEPTUNE | ENSG00000187513 | GJA4     | 1.54 | 5.29E-08 |
| NEPTUNE | ENSG00000165102 | HGSNAT   | 1.54 | 1.35E-08 |
| NEPTUNE | ENSG00000188322 | SBK1     | 1.54 | 8.24E-10 |
| NEPTUNE | ENSG00000102349 | KLF8     | 1.54 | 3.43E-13 |
| NEPTUNE | ENSG00000218336 | TENM3    | 1.54 | 1.92E-13 |

|         |                 |           |      |          |
|---------|-----------------|-----------|------|----------|
| NEPTUNE | ENSG00000132256 | TRIM5     | 1.54 | 2.59E-13 |
| NEPTUNE | ENSG00000127603 | MACF1     | 1.54 | 2.15E-10 |
| NEPTUNE | ENSG00000135272 | MDFIC     | 1.54 | 1.08E-06 |
| NEPTUNE | ENSG00000146433 | TMEM181   | 1.54 | 1.29E-12 |
| NEPTUNE | ENSG00000282851 | BISPR     | 1.54 | 9.00E-14 |
| NEPTUNE | ENSG00000144152 | FBLN7     | 1.54 | 3.32E-13 |
| NEPTUNE | ENSG00000168280 | KIF5C     | 1.54 | 1.35E-08 |
| NEPTUNE | ENSG00000145908 | ZNF300    | 1.54 | 3.11E-13 |
| NEPTUNE | ENSG00000204161 | TMEM273   | 1.54 | 1.09E-02 |
| NEPTUNE | ENSG00000142634 | EFHD2     | 1.54 | 1.56E-06 |
| NEPTUNE | ENSG00000104361 | NIPAL2    | 1.54 | 2.71E-09 |
| NEPTUNE | ENSG00000147852 | VLDLR     | 1.54 | 1.37E-14 |
| NEPTUNE | ENSG00000146374 | RSPO3     | 1.54 | 1.70E-06 |
| NEPTUNE | ENSG00000184602 | SNN       | 1.54 | 1.02E-10 |
| NEPTUNE | ENSG00000175920 | DOK7      | 1.54 | 4.79E-09 |
| NEPTUNE | ENSG00000179603 | GRM8      | 1.54 | 7.90E-13 |
| NEPTUNE | ENSG00000227051 | C14orf132 | 1.54 | 1.70E-06 |
| NEPTUNE | ENSG00000130702 | LAMA5     | 1.54 | 2.69E-11 |
| NEPTUNE | ENSG00000111450 | STX2      | 1.54 | 3.42E-15 |
| NEPTUNE | ENSG00000072858 | SIDT1     | 1.54 | 1.07E-12 |
| NEPTUNE | ENSG00000174501 | ANKRD36C  | 1.54 | 4.38E-05 |
| NEPTUNE | ENSG00000130300 | PLVAP     | 1.55 | 2.20E-06 |
| NEPTUNE | ENSG00000162522 | KIAA1522  | 1.55 | 1.05E-12 |
| NEPTUNE | ENSG00000117020 | AKT3      | 1.55 | 1.05E-12 |
| NEPTUNE | ENSG00000139998 | RAB15     | 1.55 | 5.56E-05 |
| NEPTUNE | ENSG00000044574 | HSPA5     | 1.55 | 1.47E-09 |
| NEPTUNE | ENSG00000155974 | GRIP1     | 1.55 | 7.74E-10 |
| NEPTUNE | ENSG00000186407 | CD300E    | 1.55 | 7.23E-13 |
| NEPTUNE | ENSG00000139832 | RAB20     | 1.55 | 5.99E-13 |
| NEPTUNE | ENSG00000074527 | NTN4      | 1.55 | 1.76E-06 |
| NEPTUNE | ENSG00000158164 | TMSB15A   | 1.55 | 1.69E-11 |
| NEPTUNE | ENSG00000135480 | KRT7      | 1.55 | 1.41E-06 |
| NEPTUNE | ENSG00000185291 | IL3RA     | 1.55 | 9.24E-17 |
| NEPTUNE | ENSG00000116661 | FBXO2     | 1.55 | 1.43E-08 |
| NEPTUNE | ENSG00000204160 | ZDHHC18   | 1.55 | 5.89E-07 |
| NEPTUNE | ENSG00000175727 | MLXIP     | 1.55 | 1.08E-10 |
| NEPTUNE | ENSG00000135736 | CCDC102A  | 1.55 | 4.61E-07 |
| NEPTUNE | ENSG00000118946 | PCDH17    | 1.55 | 5.28E-10 |
| NEPTUNE | ENSG00000171208 | NETO2     | 1.55 | 4.93E-08 |
| NEPTUNE | ENSG00000108387 | SEPTIN4   | 1.55 | 1.91E-13 |
| NEPTUNE | ENSG00000179051 | RCC2      | 1.55 | 6.94E-05 |
| NEPTUNE | ENSG00000173212 | MAB21L3   | 1.55 | 9.00E-10 |
| NEPTUNE | ENSG00000157483 | MYO1E     | 1.56 | 3.76E-10 |
| NEPTUNE | ENSG00000127399 | LRRC61    | 1.56 | 6.56E-15 |
| NEPTUNE | ENSG00000140836 | ZFHX3     | 1.56 | 2.77E-12 |
| NEPTUNE | ENSG00000182010 | RTKN2     | 1.56 | 5.21E-16 |
| NEPTUNE | ENSG00000008405 | CRY1      | 1.56 | 1.18E-12 |
| NEPTUNE | ENSG00000196912 | ANKRD36B  | 1.56 | 5.18E-06 |
| NEPTUNE | ENSG00000182584 | ACTL10    | 1.56 | 3.97E-15 |
| NEPTUNE | ENSG00000167202 | TBC1D2B   | 1.56 | 1.97E-11 |
| NEPTUNE | ENSG00000181826 | RELL1     | 1.56 | 1.62E-12 |
| NEPTUNE | ENSG00000133169 | BEX1      | 1.56 | 9.76E-08 |
| NEPTUNE | ENSG00000171819 | ANGPTL7   | 1.56 | 1.44E-06 |

|         |                 |              |      |          |
|---------|-----------------|--------------|------|----------|
| NEPTUNE | ENSG00000071246 | VASH1        | 1.56 | 4.57E-14 |
| NEPTUNE | ENSG00000092470 | WDR76        | 1.56 | 2.05E-13 |
| NEPTUNE | ENSG00000101412 | E2F1         | 1.56 | 4.20E-09 |
| NEPTUNE | ENSG00000197903 | H2BC12       | 1.56 | 1.16E-10 |
| NEPTUNE | ENSG00000061656 | SPAG4        | 1.56 | 1.49E-13 |
| NEPTUNE | ENSG00000064787 | BCAS1        | 1.56 | 3.54E-10 |
| NEPTUNE | ENSG00000167080 | B4GALNT2     | 1.56 | 2.01E-04 |
| NEPTUNE | ENSG00000182985 | CADM1        | 1.56 | 1.16E-16 |
| NEPTUNE | ENSG00000112137 | PHACTR1      | 1.56 | 1.24E-06 |
| NEPTUNE | ENSG00000103335 | PIEZO1       | 1.56 | 3.59E-08 |
| NEPTUNE | ENSG00000244649 | LINC02086    | 1.56 | 8.67E-17 |
| NEPTUNE | ENSG00000262655 | SPON1        | 1.56 | 5.22E-03 |
| NEPTUNE | ENSG00000104368 | PLAT         | 1.56 | 8.45E-06 |
| NEPTUNE | ENSG00000267128 | RNF157-AS1   | 1.56 | 1.62E-16 |
| NEPTUNE | ENSG00000108106 | UBE2S        | 1.56 | 3.69E-09 |
| NEPTUNE | ENSG00000129925 | PGAP6        | 1.56 | 7.19E-04 |
| NEPTUNE | ENSG00000079102 | RUNX1T1      | 1.56 | 5.66E-10 |
| NEPTUNE | ENSG00000112419 | PHACTR2      | 1.56 | 1.64E-17 |
| NEPTUNE | ENSG00000204175 | GPRIN2       | 1.56 | 6.40E-05 |
| NEPTUNE | ENSG00000177337 | DLGAP1-AS1   | 1.56 | 3.33E-15 |
| NEPTUNE | ENSG00000173744 | AGFG1        | 1.56 | 2.61E-06 |
| NEPTUNE | ENSG00000087586 | AURKA        | 1.56 | 6.07E-12 |
| NEPTUNE | ENSG00000100234 | TIMP3        | 1.57 | 2.56E-06 |
| NEPTUNE | ENSG00000230234 | LOC105378088 | 1.57 | 4.61E-12 |
| NEPTUNE | ENSG00000196843 | ARID5A       | 1.57 | 2.01E-10 |
| NEPTUNE | ENSG00000071539 | TRIP13       | 1.57 | 1.61E-11 |
| NEPTUNE | ENSG00000142731 | PLK4         | 1.57 | 7.58E-12 |
| NEPTUNE | ENSG00000196878 | LAMB3        | 1.57 | 2.39E-08 |
| NEPTUNE | ENSG00000144857 | BOC          | 1.57 | 2.15E-09 |
| NEPTUNE | ENSG00000197147 | LRRC8B       | 1.57 | 4.07E-14 |
| NEPTUNE | ENSG00000161791 | FMNL3        | 1.57 | 3.69E-10 |
| NEPTUNE | ENSG00000173926 | MARCHF3      | 1.57 | 3.26E-16 |
| NEPTUNE | ENSG00000100345 | MYH9         | 1.57 | 1.35E-10 |
| NEPTUNE | ENSG00000206053 | JPT2         | 1.57 | 2.90E-17 |
| NEPTUNE | ENSG00000196756 | SNHG17       | 1.57 | 2.41E-06 |
| NEPTUNE | ENSG00000162654 | GBP4         | 1.57 | 3.89E-08 |
| NEPTUNE | ENSG00000162636 | FAM102B      | 1.57 | 7.92E-12 |
| NEPTUNE | ENSG00000174371 | EXO1         | 1.57 | 2.78E-11 |
| NEPTUNE | ENSG00000242516 | LINC00960    | 1.57 | 1.33E-06 |
| NEPTUNE | ENSG00000131187 | F12          | 1.57 | 2.41E-14 |
| NEPTUNE | ENSG00000142208 | AKT1         | 1.57 | 3.90E-04 |
| NEPTUNE | ENSG00000120280 | TASL         | 1.57 | 3.92E-13 |
| NEPTUNE | ENSG00000136237 | RAPGEF5      | 1.57 | 1.58E-10 |
| NEPTUNE | ENSG00000198018 | ENTPD7       | 1.57 | 7.73E-14 |
| NEPTUNE | ENSG00000145358 | DDIT4L       | 1.57 | 5.93E-04 |
| NEPTUNE | ENSG00000026652 | AGPAT4       | 1.57 | 6.61E-13 |
| NEPTUNE | ENSG00000158122 | PRXL2C       | 1.57 | 2.35E-11 |
| NEPTUNE | ENSG00000104415 | CCN4         | 1.57 | 9.86E-13 |
| NEPTUNE | ENSG00000179314 | WSCD1        | 1.57 | 2.81E-10 |
| NEPTUNE | ENSG00000171533 | MAP6         | 1.57 | 1.24E-04 |
| NEPTUNE | ENSG00000152952 | PLOD2        | 1.57 | 1.29E-14 |
| NEPTUNE | ENSG00000204634 | TBC1D8       | 1.57 | 6.58E-11 |
| NEPTUNE | ENSG00000136379 | ABHD17C      | 1.57 | 6.41E-05 |



|         |                 |          |      |          |
|---------|-----------------|----------|------|----------|
| NEPTUNE | ENSG00000109689 | STIM2    | 1.57 | 4.23E-12 |
| NEPTUNE | ENSG00000091879 | ANGPT2   | 1.57 | 2.04E-08 |
| NEPTUNE | ENSG00000146373 | RNF217   | 1.57 | 3.43E-15 |
| NEPTUNE | ENSG00000135253 | KCP      | 1.58 | 4.62E-14 |
| NEPTUNE | ENSG00000081923 | ATP8B1   | 1.58 | 5.57E-09 |
| NEPTUNE | ENSG00000138650 | PCDH10   | 1.58 | 9.74E-09 |
| NEPTUNE | ENSG00000106852 | LHX6     | 1.58 | 1.59E-14 |
| NEPTUNE | ENSG00000150556 | LYPD6B   | 1.58 | 9.62E-08 |
| NEPTUNE | ENSG00000180730 | SHISA2   | 1.58 | 1.23E-08 |
| NEPTUNE | ENSG00000033170 | FUT8     | 1.58 | 2.47E-15 |
| NEPTUNE | ENSG00000163785 | RYK      | 1.58 | 1.33E-06 |
| NEPTUNE | ENSG00000123384 | LRP1     | 1.58 | 1.56E-10 |
| NEPTUNE | ENSG00000162595 | DIRAS3   | 1.58 | 6.86E-09 |
| NEPTUNE | ENSG00000240356 | RPL23AP7 | 1.58 | 1.83E-16 |
| NEPTUNE | ENSG00000162591 | MEGF6    | 1.58 | 6.56E-09 |
| NEPTUNE | ENSG00000146674 | IGFBP3   | 1.58 | 2.68E-04 |
| NEPTUNE | ENSG00000075391 | RASAL2   | 1.58 | 1.55E-15 |
| NEPTUNE | ENSG00000107719 | PALD1    | 1.58 | 1.76E-10 |
| NEPTUNE | ENSG00000196975 | ANXA4    | 1.58 | 1.32E-19 |
| NEPTUNE | ENSG00000154319 | FAM167A  | 1.58 | 3.20E-09 |
| NEPTUNE | ENSG00000184828 | ZBTB7C   | 1.58 | 3.15E-12 |
| NEPTUNE | ENSG00000117385 | P3H1     | 1.58 | 3.90E-12 |
| NEPTUNE | ENSG00000174099 | MSRB3    | 1.58 | 1.08E-09 |
| NEPTUNE | ENSG00000021645 | NRXN3    | 1.58 | 5.95E-11 |
| NEPTUNE | ENSG00000131477 | RAMP2    | 1.58 | 3.51E-12 |
| NEPTUNE | ENSG00000185070 | FLRT2    | 1.58 | 1.17E-09 |
| NEPTUNE | ENSG00000130158 | DOCK6    | 1.58 | 1.25E-12 |
| NEPTUNE | ENSG00000151694 | ADAM17   | 1.58 | 4.03E-09 |
| NEPTUNE | ENSG00000142632 | ARHGEF19 | 1.58 | 6.24E-12 |
| NEPTUNE | ENSG00000265972 | TXNIP    | 1.58 | 8.75E-14 |
| NEPTUNE | ENSG00000150201 | FXVD4    | 1.59 | 3.68E-03 |
| NEPTUNE | ENSG00000133640 | LRRIQ1   | 1.59 | 9.91E-15 |
| NEPTUNE | ENSG00000165617 | DACT1    | 1.59 | 1.06E-09 |
| NEPTUNE | ENSG00000213214 | ARHGEF35 | 1.59 | 7.03E-07 |
| NEPTUNE | ENSG00000101160 | CTSZ     | 1.59 | 1.51E-09 |
| NEPTUNE | ENSG00000055118 | KCNH2    | 1.59 | 1.80E-13 |
| NEPTUNE | ENSG00000111801 | BTN3A3   | 1.59 | 3.40E-14 |
| NEPTUNE | ENSG00000196581 | AJAP1    | 1.59 | 1.14E-05 |
| NEPTUNE | ENSG00000147676 | MAL2     | 1.59 | 2.55E-10 |
| NEPTUNE | ENSG00000149090 | PAMR1    | 1.59 | 1.02E-05 |
| NEPTUNE | ENSG00000006468 | ETV1     | 1.59 | 3.45E-07 |
| NEPTUNE | ENSG00000184014 | DENND5A  | 1.59 | 1.53E-09 |
| NEPTUNE | ENSG00000157617 | C2CD2    | 1.59 | 9.23E-13 |
| NEPTUNE | ENSG00000198915 | RASGEF1A | 1.59 | 1.08E-14 |
| NEPTUNE | ENSG00000109586 | GALNT7   | 1.59 | 1.46E-15 |
| NEPTUNE | ENSG00000141526 | SLC16A3  | 1.59 | 9.54E-15 |
| NEPTUNE | ENSG00000100994 | PYGB     | 1.59 | 1.41E-11 |
| NEPTUNE | ENSG00000248441 | LETR1    | 1.59 | 5.02E-12 |
| NEPTUNE | ENSG00000103647 | CORO2B   | 1.59 | 6.46E-10 |
| NEPTUNE | ENSG00000204520 | MICA     | 1.59 | 2.73E-16 |
| NEPTUNE | ENSG00000164930 | FZD6     | 1.59 | 5.95E-16 |
| NEPTUNE | ENSG00000167641 | PPP1R14A | 1.59 | 2.39E-10 |
| NEPTUNE | ENSG00000114353 | GNAI2    | 1.59 | 2.63E-12 |

|         |                 |              |      |          |
|---------|-----------------|--------------|------|----------|
| NEPTUNE | ENSG00000129474 | AJUBA        | 1.60 | 4.56E-10 |
| NEPTUNE | ENSG00000275832 | ARHGAP23     | 1.60 | 7.92E-08 |
| NEPTUNE | ENSG00000251661 | RP11_326C311 | 1.60 | 5.96E-17 |
| NEPTUNE | ENSG00000105519 | CAPS         | 1.60 | 1.49E-10 |
| NEPTUNE | ENSG00000145990 | GFOD1        | 1.60 | 9.05E-13 |
| NEPTUNE | ENSG00000115159 | GPD2         | 1.60 | 8.25E-14 |
| NEPTUNE | ENSG00000074590 | NUAK1        | 1.60 | 1.95E-12 |
| NEPTUNE | ENSG00000187957 | DNER         | 1.60 | 1.42E-04 |
| NEPTUNE | ENSG00000182118 | FAM89A       | 1.60 | 3.50E-06 |
| NEPTUNE | ENSG00000113916 | BCL6         | 1.60 | 1.63E-09 |
| NEPTUNE | ENSG00000172379 | ARNT2        | 1.60 | 1.75E-10 |
| NEPTUNE | ENSG00000075643 | MOCOS        | 1.60 | 2.35E-13 |
| NEPTUNE | ENSG00000176046 | NUPR1        | 1.60 | 2.37E-06 |
| NEPTUNE | ENSG00000139567 | ACVRL1       | 1.60 | 6.92E-15 |
| NEPTUNE | ENSG00000104892 | KLC3         | 1.60 | 6.71E-15 |
| NEPTUNE | ENSG00000183049 | CAMK1D       | 1.60 | 2.96E-12 |
| NEPTUNE | ENSG00000147119 | CHST7        | 1.60 | 7.68E-18 |
| NEPTUNE | ENSG00000151689 | INPP1        | 1.60 | 1.85E-18 |
| NEPTUNE | ENSG00000249746 | RP11_254I223 | 1.60 | 6.12E-19 |
| NEPTUNE | ENSG00000162618 | ADGRL4       | 1.60 | 2.41E-11 |
| NEPTUNE | ENSG00000054219 | LY75         | 1.60 | 4.36E-10 |
| NEPTUNE | ENSG00000184347 | SLIT3        | 1.60 | 1.65E-09 |
| NEPTUNE | ENSG00000186806 | VSIG10L      | 1.60 | 7.86E-19 |
| NEPTUNE | ENSG00000182013 | PNMA8A       | 1.60 | 6.54E-13 |
| NEPTUNE | ENSG00000164307 | ERAP1        | 1.60 | 4.05E-16 |
| NEPTUNE | ENSG00000172071 | EIF2AK3      | 1.60 | 8.52E-11 |
| NEPTUNE | ENSG00000177570 | SAMD12       | 1.60 | 5.47E-16 |
| NEPTUNE | ENSG00000162063 | CCNF         | 1.60 | 4.56E-12 |
| NEPTUNE | ENSG00000180871 | CXCR2        | 1.60 | 3.05E-09 |
| NEPTUNE | ENSG00000029993 | HMGB3        | 1.60 | 9.29E-16 |
| NEPTUNE | ENSG00000148110 | MFSD14B      | 1.61 | 4.78E-06 |
| NEPTUNE | ENSG00000089356 | FXD3         | 1.61 | 3.10E-06 |
| NEPTUNE | ENSG00000142798 | HSPG2        | 1.61 | 1.67E-10 |
| NEPTUNE | ENSG00000104450 | SPAG1        | 1.61 | 2.44E-14 |
| NEPTUNE | ENSG00000088832 | FKBP1A       | 1.61 | 4.49E-22 |
| NEPTUNE | ENSG00000155761 | SPAG17       | 1.61 | 1.22E-12 |
| NEPTUNE | ENSG00000214381 | LINC00488    | 1.61 | 3.68E-15 |
| NEPTUNE | ENSG00000120889 | TNFRSF10B    | 1.61 | 1.79E-13 |
| NEPTUNE | ENSG00000249396 | LINC02212    | 1.61 | 4.55E-17 |
| NEPTUNE | ENSG00000115457 | IGFBP2       | 1.61 | 1.60E-02 |
| NEPTUNE | ENSG00000160588 | MPZL3        | 1.61 | 5.66E-16 |
| NEPTUNE | ENSG00000106991 | ENG          | 1.61 | 2.19E-10 |
| NEPTUNE | ENSG00000113441 | LNPEP        | 1.61 | 4.11E-15 |
| NEPTUNE | ENSG00000117472 | TSPAN1       | 1.61 | 2.73E-16 |
| NEPTUNE | ENSG00000244486 | SCARF2       | 1.61 | 2.79E-06 |
| NEPTUNE | ENSG00000165124 | SVEP1        | 1.61 | 1.41E-09 |
| NEPTUNE | ENSG00000105699 | LSR          | 1.61 | 2.72E-16 |
| NEPTUNE | ENSG00000159128 | IFNGR2       | 1.61 | 8.03E-12 |
| NEPTUNE | ENSG00000112186 | CAP2         | 1.61 | 1.52E-19 |
| NEPTUNE | ENSG00000168758 | SEMA4C       | 1.61 | 1.46E-16 |
| NEPTUNE | ENSG00000015475 | BID          | 1.61 | 8.28E-22 |
| NEPTUNE | ENSG00000197256 | KANK2        | 1.61 | 1.56E-15 |
| NEPTUNE | ENSG00000106484 | MEST         | 1.61 | 1.98E-12 |

|         |                 |           |      |          |
|---------|-----------------|-----------|------|----------|
| NEPTUNE | ENSG00000111961 | SASH1     | 1.61 | 8.70E-12 |
| NEPTUNE | ENSG00000140403 | DNAJA4    | 1.61 | 1.51E-11 |
| NEPTUNE | ENSG00000113368 | LMNB1     | 1.62 | 2.10E-13 |
| NEPTUNE | ENSG00000128203 | ASPHD2    | 1.62 | 6.35E-10 |
| NEPTUNE | ENSG00000112337 | SLC17A2   | 1.62 | 7.83E-10 |
| NEPTUNE | ENSG00000173156 | RHOD      | 1.62 | 3.39E-14 |
| NEPTUNE | ENSG00000146858 | ZC3HAV1L  | 1.62 | 1.46E-17 |
| NEPTUNE | ENSG00000179913 | B3GNT3    | 1.62 | 3.49E-05 |
| NEPTUNE | ENSG00000205978 | NYNRIN    | 1.62 | 7.42E-10 |
| NEPTUNE | ENSG00000135976 | ANKRD36   | 1.62 | 2.81E-06 |
| NEPTUNE | ENSG00000116678 | LEPR      | 1.62 | 1.67E-11 |
| NEPTUNE | ENSG00000157833 | GAREM2    | 1.62 | 5.08E-11 |
| NEPTUNE | ENSG00000126785 | RHOJ      | 1.62 | 1.33E-10 |
| NEPTUNE | ENSG00000116871 | MAP7D1    | 1.62 | 4.90E-12 |
| NEPTUNE | ENSG00000113209 | PCDHB5    | 1.62 | 5.00E-13 |
| NEPTUNE | ENSG00000129467 | ADCY4     | 1.62 | 3.17E-11 |
| NEPTUNE | ENSG00000100504 | PYGL      | 1.62 | 7.40E-10 |
| NEPTUNE | ENSG00000172123 | SLFN12    | 1.63 | 4.01E-14 |
| NEPTUNE | ENSG00000140285 | FGF7      | 1.63 | 4.69E-09 |
| NEPTUNE | ENSG00000137473 | TTC29     | 1.63 | 4.15E-08 |
| NEPTUNE | ENSG00000133561 | GIMAP6    | 1.63 | 5.12E-12 |
| NEPTUNE | ENSG00000150637 | CD226     | 1.63 | 5.30E-13 |
| NEPTUNE | ENSG00000179921 | GPBAR1    | 1.63 | 2.57E-08 |
| NEPTUNE | ENSG00000269985 | FARS2-AS1 | 1.63 | 2.18E-09 |
| NEPTUNE | ENSG00000107201 | DDX58     | 1.63 | 4.39E-18 |
| NEPTUNE | ENSG00000149564 | ESAM      | 1.63 | 1.18E-11 |
| NEPTUNE | ENSG00000161888 | SPC24     | 1.63 | 2.77E-14 |
| NEPTUNE | ENSG00000237943 | PRKCQ-AS1 | 1.63 | 8.95E-09 |
| NEPTUNE | ENSG00000165801 | ARHGEF40  | 1.63 | 2.27E-12 |
| NEPTUNE | ENSG00000150048 | CLEC1A    | 1.63 | 1.32E-15 |
| NEPTUNE | ENSG00000253276 | CCDC71L   | 1.63 | 5.40E-18 |
| NEPTUNE | ENSG00000182795 | C1orf116  | 1.63 | 1.38E-13 |
| NEPTUNE | ENSG00000138771 | SHROOM3   | 1.63 | 3.58E-14 |
| NEPTUNE | ENSG00000117228 | GBP1      | 1.63 | 6.80E-17 |
| NEPTUNE | ENSG00000177508 | IRX3      | 1.63 | 5.83E-08 |
| NEPTUNE | ENSG00000075151 | EIF4G3    | 1.63 | 1.52E-13 |
| NEPTUNE | ENSG00000125449 | ARMC7     | 1.63 | 1.09E-19 |
| NEPTUNE | ENSG00000170323 | FABP4     | 1.63 | 3.26E-05 |
| NEPTUNE | ENSG00000215861 | LOC653513 | 1.63 | 8.75E-12 |
| NEPTUNE | ENSG00000128016 | ZFP36     | 1.63 | 2.24E-17 |
| NEPTUNE | ENSG00000173269 | MMRN2     | 1.63 | 2.50E-06 |
| NEPTUNE | ENSG00000047365 | ARAP2     | 1.63 | 1.52E-15 |
| NEPTUNE | ENSG00000128591 | FLNC      | 1.63 | 1.65E-13 |
| NEPTUNE | ENSG00000125505 | MBOAT7    | 1.63 | 1.49E-17 |
| NEPTUNE | ENSG00000171303 | KCNK3     | 1.63 | 1.37E-08 |
| NEPTUNE | ENSG00000115525 | ST3GAL5   | 1.63 | 4.81E-18 |
| NEPTUNE | ENSG00000149798 | CDC42EP2  | 1.63 | 9.76E-13 |
| NEPTUNE | ENSG00000162909 | CAPN2     | 1.63 | 3.88E-17 |
| NEPTUNE | ENSG00000147394 | ZNF185    | 1.63 | 7.93E-11 |
| NEPTUNE | ENSG00000112214 | FHL5      | 1.63 | 2.87E-09 |
| NEPTUNE | ENSG00000203724 | C1orf53   | 1.64 | 1.43E-16 |
| NEPTUNE | ENSG00000152818 | UTRN      | 1.64 | 1.56E-08 |
| NEPTUNE | ENSG00000164330 | EBF1      | 1.64 | 5.28E-11 |

|         |                 |           |      |          |
|---------|-----------------|-----------|------|----------|
| NEPTUNE | ENSG00000061918 | GUCY1B1   | 1.64 | 1.51E-14 |
| NEPTUNE | ENSG00000198889 | DCAF12L1  | 1.64 | 8.40E-07 |
| NEPTUNE | ENSG00000131873 | CHSY1     | 1.64 | 5.18E-19 |
| NEPTUNE | ENSG00000128641 | MYO1B     | 1.64 | 1.56E-10 |
| NEPTUNE | ENSG00000115902 | SLC1A4    | 1.64 | 3.68E-12 |
| NEPTUNE | ENSG00000128872 | TMOD2     | 1.64 | 6.52E-15 |
| NEPTUNE | ENSG00000129173 | E2F8      | 1.64 | 3.94E-16 |
| NEPTUNE | ENSG00000153823 | PID1      | 1.64 | 1.07E-12 |
| NEPTUNE | ENSG00000137573 | SULF1     | 1.64 | 9.09E-06 |
| NEPTUNE | ENSG00000157227 | MMP14     | 1.64 | 1.78E-18 |
| NEPTUNE | ENSG00000118257 | NRP2      | 1.64 | 5.29E-11 |
| NEPTUNE | ENSG00000221963 | APOL6     | 1.64 | 4.67E-14 |
| NEPTUNE | ENSG00000145569 | OTULINL   | 1.64 | 5.16E-17 |
| NEPTUNE | ENSG00000259092 | TRAV30    | 1.64 | 3.75E-12 |
| NEPTUNE | ENSG00000184113 | CLDN5     | 1.64 | 1.81E-07 |
| NEPTUNE | ENSG00000221869 | CEBPD     | 1.64 | 1.11E-03 |
| NEPTUNE | ENSG00000135373 | EHF       | 1.64 | 1.43E-07 |
| NEPTUNE | ENSG00000076067 | RBMS2     | 1.64 | 1.95E-21 |
| NEPTUNE | ENSG00000113657 | DPYSL3    | 1.64 | 8.52E-10 |
| NEPTUNE | ENSG00000095777 | MYO3A     | 1.64 | 8.60E-16 |
| NEPTUNE | ENSG00000134250 | NOTCH2    | 1.64 | 1.08E-12 |
| NEPTUNE | ENSG00000143228 | NUF2      | 1.64 | 3.31E-14 |
| NEPTUNE | ENSG00000164379 | FOXQ1     | 1.64 | 2.27E-05 |
| NEPTUNE | ENSG00000163513 | TGFBR2    | 1.64 | 4.63E-11 |
| NEPTUNE | ENSG00000134769 | DTNA      | 1.64 | 3.33E-15 |
| NEPTUNE | ENSG00000164761 | TNFRSF11B | 1.65 | 1.83E-14 |
| NEPTUNE | ENSG00000111665 | CDCA3     | 1.65 | 3.47E-12 |
| NEPTUNE | ENSG00000103034 | NDRG4     | 1.65 | 8.01E-14 |
| NEPTUNE | ENSG00000166145 | SPINT1    | 1.65 | 7.75E-17 |
| NEPTUNE | ENSG00000090376 | IRAK3     | 1.65 | 9.26E-17 |
| NEPTUNE | ENSG00000272674 | PCDHB16   | 1.65 | 1.69E-14 |
| NEPTUNE | ENSG00000091436 | MAP3K20   | 1.65 | 1.86E-13 |
| NEPTUNE | ENSG00000267534 | S1PR2     | 1.65 | 1.20E-24 |
| NEPTUNE | ENSG00000136052 | SLC41A2   | 1.65 | 2.28E-18 |
| NEPTUNE | ENSG00000138778 | CENPE     | 1.65 | 9.00E-17 |
| NEPTUNE | ENSG00000137821 | LRRC49    | 1.65 | 3.02E-21 |
| NEPTUNE | ENSG00000084070 | SMAP2     | 1.65 | 3.15E-16 |
| NEPTUNE | ENSG00000081985 | IL12RB2   | 1.65 | 1.39E-10 |
| NEPTUNE | ENSG00000134333 | LDHA      | 1.65 | 9.78E-23 |
| NEPTUNE | ENSG00000189056 | RELN      | 1.65 | 1.16E-12 |
| NEPTUNE | ENSG00000204267 | TAP2      | 1.65 | 9.98E-21 |
| NEPTUNE | ENSG00000170921 | TANC2     | 1.65 | 9.05E-15 |
| NEPTUNE | ENSG00000251562 | MALAT1    | 1.65 | 4.23E-03 |
| NEPTUNE | ENSG00000154640 | BTG3      | 1.66 | 8.06E-15 |
| NEPTUNE | ENSG00000103257 | SLC7A5    | 1.66 | 1.06E-07 |
| NEPTUNE | ENSG00000182541 | LIMK2     | 1.66 | 1.34E-17 |
| NEPTUNE | ENSG00000119397 | CNTRL     | 1.66 | 1.94E-16 |
| NEPTUNE | ENSG00000103253 | HAGHL     | 1.66 | 4.88E-13 |
| NEPTUNE | ENSG00000165480 | SKA3      | 1.66 | 7.67E-11 |
| NEPTUNE | ENSG00000171522 | PTGER4    | 1.66 | 8.03E-10 |
| NEPTUNE | ENSG00000160271 | RALGDS    | 1.66 | 3.05E-07 |
| NEPTUNE | ENSG00000154928 | EPHB1     | 1.66 | 5.56E-14 |
| NEPTUNE | ENSG00000107317 | PTGDS     | 1.66 | 7.52E-04 |

|         |                 |           |      |          |
|---------|-----------------|-----------|------|----------|
| NEPTUNE | ENSG00000130827 | PLXNA3    | 1.66 | 1.09E-17 |
| NEPTUNE | ENSG00000205336 | ADGRG1    | 1.66 | 3.03E-11 |
| NEPTUNE | ENSG00000164305 | CASP3     | 1.66 | 8.59E-23 |
| NEPTUNE | ENSG00000182463 | TSHZ2     | 1.66 | 3.25E-14 |
| NEPTUNE | ENSG00000213699 | SLC35F6   | 1.66 | 3.79E-16 |
| NEPTUNE | ENSG00000141655 | TNFRSF11A | 1.66 | 1.38E-19 |
| NEPTUNE | ENSG00000198523 | PLN       | 1.66 | 8.09E-06 |
| NEPTUNE | ENSG00000150594 | ADRA2A    | 1.66 | 1.39E-11 |
| NEPTUNE | ENSG00000185633 | NDUFA4L2  | 1.66 | 5.64E-12 |
| NEPTUNE | ENSG00000114999 | TTL       | 1.66 | 3.53E-12 |
| NEPTUNE | ENSG00000196371 | FUT4      | 1.66 | 2.18E-17 |
| NEPTUNE | ENSG00000099331 | MYO9B     | 1.66 | 1.23E-16 |
| NEPTUNE | ENSG00000152229 | PSTPIP2   | 1.66 | 2.70E-15 |
| NEPTUNE | ENSG00000125266 | EFNB2     | 1.66 | 5.14E-09 |
| NEPTUNE | ENSG00000143126 | CELSR2    | 1.66 | 1.90E-14 |
| NEPTUNE | ENSG00000157827 | FMNL2     | 1.66 | 1.13E-15 |
| NEPTUNE | ENSG00000011028 | MRC2      | 1.66 | 8.64E-11 |
| NEPTUNE | ENSG00000251442 | LINC01094 | 1.66 | 1.69E-20 |
| NEPTUNE | ENSG00000066279 | ASPM      | 1.67 | 1.38E-11 |
| NEPTUNE | ENSG00000105810 | CDK6      | 1.67 | 1.87E-15 |
| NEPTUNE | ENSG00000127415 | IDUA      | 1.67 | 8.07E-09 |
| NEPTUNE | ENSG00000185338 | SOCS1     | 1.67 | 3.01E-11 |
| NEPTUNE | ENSG00000106538 | RARRES2   | 1.67 | 1.70E-13 |
| NEPTUNE | ENSG00000139970 | RTN1      | 1.67 | 1.41E-08 |
| NEPTUNE | ENSG00000167912 | TOX-DT    | 1.67 | 2.45E-20 |
| NEPTUNE | ENSG00000221968 | FADS3     | 1.67 | 4.31E-13 |
| NEPTUNE | ENSG00000111247 | RAD51AP1  | 1.67 | 9.61E-15 |
| NEPTUNE | ENSG00000136720 | HS6ST1    | 1.67 | 2.56E-05 |
| NEPTUNE | ENSG00000068489 | PRR11     | 1.67 | 2.24E-21 |
| NEPTUNE | ENSG00000107014 | RLN2      | 1.67 | 1.47E-22 |
| NEPTUNE | ENSG00000105976 | MET       | 1.67 | 2.44E-15 |
| NEPTUNE | ENSG00000101695 | RNF125    | 1.67 | 1.40E-15 |
| NEPTUNE | ENSG00000135144 | DTX1      | 1.67 | 3.07E-15 |
| NEPTUNE | ENSG00000086300 | SNX10     | 1.67 | 8.76E-17 |
| NEPTUNE | ENSG00000160213 | CSTB      | 1.67 | 1.54E-17 |
| NEPTUNE | ENSG00000173442 | EHBP1L1   | 1.67 | 2.12E-15 |
| NEPTUNE | ENSG00000163017 | ACTG2     | 1.67 | 6.78E-06 |
| NEPTUNE | ENSG00000169418 | NPR1      | 1.67 | 7.59E-09 |
| NEPTUNE | ENSG00000182636 | NDN       | 1.67 | 4.44E-12 |
| NEPTUNE | ENSG00000171224 | FAM241B   | 1.67 | 4.44E-26 |
| NEPTUNE | ENSG00000169607 | CKAP2L    | 1.67 | 2.82E-13 |
| NEPTUNE | ENSG00000140575 | IQGAP1    | 1.67 | 3.81E-17 |
| NEPTUNE | ENSG00000205730 | ITPRIPL2  | 1.68 | 5.05E-11 |
| NEPTUNE | ENSG00000152558 | TMEM123   | 1.68 | 3.39E-29 |
| NEPTUNE | ENSG00000185527 | PDE6G     | 1.68 | 1.14E-13 |
| NEPTUNE | ENSG00000183741 | CBX6      | 1.68 | 1.01E-25 |
| NEPTUNE | ENSG00000167470 | MIDN      | 1.68 | 2.58E-07 |
| NEPTUNE | ENSG00000174899 | SLC66A1L  | 1.68 | 6.29E-15 |
| NEPTUNE | ENSG00000198792 | TMEM184B  | 1.68 | 3.35E-18 |
| NEPTUNE | ENSG00000106077 | ABHD11    | 1.68 | 4.89E-24 |
| NEPTUNE | ENSG00000165259 | HDX       | 1.68 | 1.25E-19 |
| NEPTUNE | ENSG00000035403 | VCL       | 1.68 | 4.00E-16 |
| NEPTUNE | ENSG00000093009 | CDC45     | 1.68 | 8.65E-14 |

|         |                 |           |      |          |
|---------|-----------------|-----------|------|----------|
| NEPTUNE | ENSG00000049540 | ELN       | 1.68 | 5.48E-08 |
| NEPTUNE | ENSG00000181019 | NQO1      | 1.68 | 2.74E-09 |
| NEPTUNE | ENSG00000099953 | MMP11     | 1.68 | 1.15E-09 |
| NEPTUNE | ENSG00000162738 | VANGL2    | 1.68 | 1.75E-19 |
| NEPTUNE | ENSG00000139618 | BRCA2     | 1.68 | 3.89E-17 |
| NEPTUNE | ENSG00000127324 | TSPAN8    | 1.68 | 1.33E-07 |
| NEPTUNE | ENSG00000167900 | TK1       | 1.68 | 1.20E-12 |
| NEPTUNE | ENSG00000183346 | CABCOCO1  | 1.68 | 2.63E-12 |
| NEPTUNE | ENSG00000166073 | GPR176    | 1.68 | 5.66E-19 |
| NEPTUNE | ENSG00000115380 | EFEMP1    | 1.69 | 1.01E-13 |
| NEPTUNE | ENSG00000160219 | GAB3      | 1.69 | 5.60E-19 |
| NEPTUNE | ENSG00000134070 | IRAK2     | 1.69 | 2.27E-15 |
| NEPTUNE | ENSG00000113248 | PCDHB15   | 1.69 | 1.47E-15 |
| NEPTUNE | ENSG00000163545 | NUAK2     | 1.69 | 1.57E-10 |
| NEPTUNE | ENSG00000197948 | FCHSD1    | 1.69 | 1.04E-23 |
| NEPTUNE | ENSG00000152256 | PDK1      | 1.69 | 2.89E-16 |
| NEPTUNE | ENSG00000050555 | LAMC3     | 1.69 | 9.16E-10 |
| NEPTUNE | ENSG00000138642 | HERC6     | 1.69 | 3.44E-13 |
| NEPTUNE | ENSG00000139318 | DUSP6     | 1.69 | 1.35E-18 |
| NEPTUNE | ENSG00000124212 | PTGIS     | 1.69 | 1.40E-08 |
| NEPTUNE | ENSG00000179403 | VWA1      | 1.69 | 3.00E-04 |
| NEPTUNE | ENSG00000159261 | CLDN14    | 1.69 | 7.30E-08 |
| NEPTUNE | ENSG00000154721 | JAM2      | 1.69 | 2.62E-12 |
| NEPTUNE | ENSG00000173020 | GRK2      | 1.69 | 2.50E-07 |
| NEPTUNE | ENSG00000153317 | ASAP1     | 1.69 | 8.99E-21 |
| NEPTUNE | ENSG00000197405 | C5AR1     | 1.69 | 1.59E-20 |
| NEPTUNE | ENSG00000188112 | C6orf132  | 1.69 | 1.91E-16 |
| NEPTUNE | ENSG00000087074 | PPP1R15A  | 1.69 | 1.61E-19 |
| NEPTUNE | ENSG00000146955 | RAB19     | 1.69 | 1.78E-17 |
| NEPTUNE | ENSG00000198826 | ARHGAP11A | 1.69 | 1.62E-12 |
| NEPTUNE | ENSG00000156113 | KCNMA1    | 1.69 | 3.05E-11 |
| NEPTUNE | ENSG00000257704 | INAFM1    | 1.69 | 8.14E-22 |
| NEPTUNE | ENSG00000204592 | HLA-E     | 1.69 | 2.62E-19 |
| NEPTUNE | ENSG00000186314 | PRELID2   | 1.69 | 3.36E-23 |
| NEPTUNE | ENSG00000116649 | SRM       | 1.69 | 4.77E-05 |
| NEPTUNE | ENSG00000119640 | ACYP1     | 1.69 | 1.14E-25 |
| NEPTUNE | ENSG00000129353 | SLC44A2   | 1.69 | 1.87E-15 |
| NEPTUNE | ENSG00000125968 | ID1       | 1.70 | 2.83E-12 |
| NEPTUNE | ENSG00000132003 | ZSWIM4    | 1.70 | 2.35E-16 |
| NEPTUNE | ENSG00000110057 | UNC93B1   | 1.70 | 7.32E-13 |
| NEPTUNE | ENSG00000146670 | CDCA5     | 1.70 | 5.11E-12 |
| NEPTUNE | ENSG00000089351 | GRAMD1A   | 1.70 | 4.62E-17 |
| NEPTUNE | ENSG00000039537 | C6        | 1.70 | 8.31E-05 |
| NEPTUNE | ENSG00000197705 | KLHL14    | 1.70 | 1.65E-14 |
| NEPTUNE | ENSG00000104964 | TLE5      | 1.70 | 8.44E-15 |
| NEPTUNE | ENSG00000122870 | BICC1     | 1.70 | 2.59E-18 |
| NEPTUNE | ENSG00000184164 | CRELD2    | 1.70 | 6.51E-18 |
| NEPTUNE | ENSG00000090006 | LTBP4     | 1.70 | 2.60E-08 |
| NEPTUNE | ENSG00000135451 | TROAP     | 1.70 | 6.46E-18 |
| NEPTUNE | ENSG00000111328 | CDK2AP1   | 1.70 | 6.59E-05 |
| NEPTUNE | ENSG00000143702 | CEP170    | 1.70 | 2.32E-17 |
| NEPTUNE | ENSG00000080293 | SCTR      | 1.70 | 4.59E-12 |
| NEPTUNE | ENSG00000168477 | TNXB      | 1.70 | 1.26E-15 |

|         |                 |             |      |          |
|---------|-----------------|-------------|------|----------|
| NEPTUNE | ENSG00000161381 | PLXDC1      | 1.70 | 1.79E-16 |
| NEPTUNE | ENSG00000135604 | STX11       | 1.71 | 1.00E-15 |
| NEPTUNE | ENSG00000159399 | HK2         | 1.71 | 2.61E-15 |
| NEPTUNE | ENSG00000164171 | ITGA2       | 1.71 | 5.90E-14 |
| NEPTUNE | ENSG00000165424 | ZCCHC24     | 1.71 | 1.42E-12 |
| NEPTUNE | ENSG00000106034 | CPED1       | 1.71 | 1.51E-11 |
| NEPTUNE | ENSG00000138722 | MMRN1       | 1.71 | 1.89E-09 |
| NEPTUNE | ENSG00000120278 | PLEKHG1     | 1.71 | 3.67E-15 |
| NEPTUNE | ENSG00000145536 | ADAMTS16    | 1.71 | 8.53E-12 |
| NEPTUNE | ENSG00000108622 | ICAM2       | 1.71 | 1.65E-18 |
| NEPTUNE | ENSG00000168350 | DEGS2       | 1.71 | 1.03E-07 |
| NEPTUNE | ENSG00000004399 | PLXND1      | 1.71 | 2.83E-14 |
| NEPTUNE | ENSG00000158555 | GDPD5       | 1.71 | 3.07E-20 |
| NEPTUNE | ENSG00000224081 | SLC44A3-AS1 | 1.71 | 2.91E-16 |
| NEPTUNE | ENSG00000112379 | ARFGEF3     | 1.71 | 1.09E-10 |
| NEPTUNE | ENSG00000214491 | SEC14L6     | 1.71 | 2.54E-12 |
| NEPTUNE | ENSG00000196189 | SEMA4A      | 1.71 | 9.16E-13 |
| NEPTUNE | ENSG00000138080 | EMILIN1     | 1.71 | 1.74E-10 |
| NEPTUNE | ENSG00000137962 | ARHGAP29    | 1.71 | 1.96E-21 |
| NEPTUNE | ENSG00000174944 | P2RY14      | 1.71 | 7.70E-17 |
| NEPTUNE | ENSG00000111339 | ART4        | 1.71 | 1.43E-16 |
| NEPTUNE | ENSG00000145860 | RNF145      | 1.71 | 2.54E-19 |
| NEPTUNE | ENSG00000245532 | NEAT1       | 1.71 | 3.44E-04 |
| NEPTUNE | ENSG00000185442 | FAM174B     | 1.71 | 1.00E-10 |
| NEPTUNE | ENSG00000160183 | TMPRSS3     | 1.71 | 6.58E-12 |
| NEPTUNE | ENSG00000065328 | MCM10       | 1.71 | 1.85E-19 |
| NEPTUNE | ENSG00000163431 | LMOD1       | 1.71 | 5.66E-10 |
| NEPTUNE | ENSG00000185519 | FAM131C     | 1.71 | 1.09E-14 |
| NEPTUNE | ENSG00000049249 | TNFRSF9     | 1.71 | 1.67E-17 |
| NEPTUNE | ENSG00000129116 | PALLD       | 1.71 | 1.94E-21 |
| NEPTUNE | ENSG00000188060 | RAB42       | 1.71 | 1.31E-17 |
| NEPTUNE | ENSG00000226193 | RP3_398G35  | 1.72 | 5.03E-20 |
| NEPTUNE | ENSG00000159387 | IRX6        | 1.72 | 1.39E-09 |
| NEPTUNE | ENSG00000145391 | SETD7       | 1.72 | 6.80E-16 |
| NEPTUNE | ENSG00000166503 | HDGFL3      | 1.72 | 3.00E-15 |
| NEPTUNE | ENSG00000101335 | MYL9        | 1.72 | 4.00E-14 |
| NEPTUNE | ENSG00000026950 | BTN3A1      | 1.72 | 6.36E-19 |
| NEPTUNE | ENSG00000187554 | TLR5        | 1.72 | 1.20E-17 |
| NEPTUNE | ENSG00000109436 | TBC1D9      | 1.72 | 4.79E-14 |
| NEPTUNE | ENSG00000171631 | P2RY6       | 1.72 | 1.92E-12 |
| NEPTUNE | ENSG00000170689 | HOXB9       | 1.72 | 3.35E-15 |
| NEPTUNE | ENSG00000182511 | FES         | 1.72 | 1.91E-15 |
| NEPTUNE | ENSG00000136383 | ALPK3       | 1.72 | 2.92E-17 |
| NEPTUNE | ENSG00000135094 | SDS         | 1.72 | 2.01E-16 |
| NEPTUNE | ENSG00000117594 | HSD11B1     | 1.72 | 7.89E-14 |
| NEPTUNE | ENSG00000258628 | RP11_492D63 | 1.72 | 2.03E-15 |
| NEPTUNE | ENSG00000139370 | SLC15A4     | 1.72 | 4.99E-09 |
| NEPTUNE | ENSG00000109452 | INPP4B      | 1.72 | 3.22E-14 |
| NEPTUNE | ENSG00000125845 | BMP2        | 1.72 | 2.82E-12 |
| NEPTUNE | ENSG00000188549 | CCDC9B      | 1.72 | 4.28E-17 |
| NEPTUNE | ENSG00000122952 | ZWINT       | 1.72 | 8.90E-16 |
| NEPTUNE | ENSG00000217442 | SYCE3       | 1.72 | 1.08E-16 |
| NEPTUNE | ENSG00000140450 | ARRDC4      | 1.73 | 2.04E-08 |

|         |                 |           |      |          |
|---------|-----------------|-----------|------|----------|
| NEPTUNE | ENSG00000075218 | GTSE1     | 1.73 | 1.62E-12 |
| NEPTUNE | ENSG00000135862 | LAMC1     | 1.73 | 5.31E-17 |
| NEPTUNE | ENSG00000225526 | MKRN2OS   | 1.73 | 1.91E-16 |
| NEPTUNE | ENSG00000140525 | FANCI     | 1.73 | 4.46E-12 |
| NEPTUNE | ENSG00000182197 | EXT1      | 1.73 | 3.00E-09 |
| NEPTUNE | ENSG00000187720 | THSD4     | 1.73 | 1.08E-12 |
| NEPTUNE | ENSG00000033867 | SLC4A7    | 1.73 | 2.91E-13 |
| NEPTUNE | ENSG00000214870 | LINC02981 | 1.73 | 3.12E-20 |
| NEPTUNE | ENSG00000163378 | EOGT      | 1.73 | 5.56E-18 |
| NEPTUNE | ENSG00000146938 | NLGN4X    | 1.73 | 8.29E-16 |
| NEPTUNE | ENSG00000188290 | HES4      | 1.73 | 3.88E-14 |
| NEPTUNE | ENSG00000109738 | GLRB      | 1.73 | 4.65E-11 |
| NEPTUNE | ENSG00000092853 | CLSPN     | 1.73 | 2.87E-18 |
| NEPTUNE | ENSG00000142185 | TRPM2     | 1.73 | 8.38E-22 |
| NEPTUNE | ENSG00000090971 | NAT14     | 1.73 | 2.66E-19 |
| NEPTUNE | ENSG00000091972 | CD200     | 1.73 | 1.94E-20 |
| NEPTUNE | ENSG00000128918 | ALDH1A2   | 1.73 | 3.96E-14 |
| NEPTUNE | ENSG00000145936 | KCNMB1    | 1.73 | 2.59E-17 |
| NEPTUNE | ENSG00000177054 | ZDHHC13   | 1.73 | 1.03E-22 |
| NEPTUNE | ENSG00000103222 | ABCC1     | 1.73 | 1.82E-17 |
| NEPTUNE | ENSG00000179542 | SLITRK4   | 1.73 | 8.92E-12 |
| NEPTUNE | ENSG00000166743 | ACSM1     | 1.73 | 3.58E-10 |
| NEPTUNE | ENSG00000189129 | PLAC9     | 1.73 | 1.02E-11 |
| NEPTUNE | ENSG00000164078 | MST1R     | 1.73 | 2.91E-18 |
| NEPTUNE | ENSG00000116793 | PHTF1     | 1.74 | 3.33E-24 |
| NEPTUNE | ENSG00000135749 | PCNX2     | 1.74 | 2.96E-20 |
| NEPTUNE | ENSG00000213983 | AP1G2     | 1.74 | 1.64E-19 |
| NEPTUNE | ENSG00000173852 | DPY19L1   | 1.74 | 4.31E-12 |
| NEPTUNE | ENSG00000113721 | PDGFRB    | 1.74 | 6.31E-11 |
| NEPTUNE | ENSG00000167081 | PBX3      | 1.74 | 4.14E-20 |
| NEPTUNE | ENSG00000204516 | MICB      | 1.74 | 9.53E-21 |
| NEPTUNE | ENSG00000213462 | ERV3-1    | 1.74 | 6.50E-14 |
| NEPTUNE | ENSG00000172830 | SSH3      | 1.74 | 2.64E-20 |
| NEPTUNE | ENSG00000107731 | UNC5B     | 1.74 | 2.06E-11 |
| NEPTUNE | ENSG00000185686 | PRAME     | 1.74 | 3.79E-10 |
| NEPTUNE | ENSG00000108846 | ABCC3     | 1.74 | 4.05E-06 |
| NEPTUNE | ENSG00000164109 | MAD2L1    | 1.74 | 1.24E-17 |
| NEPTUNE | ENSG00000147883 | CDKN2B    | 1.74 | 5.69E-24 |
| NEPTUNE | ENSG00000110811 | P3H3      | 1.74 | 5.09E-18 |
| NEPTUNE | ENSG00000073849 | ST6GAL1   | 1.74 | 1.17E-06 |
| NEPTUNE | ENSG00000078237 | TIGAR     | 1.74 | 1.27E-22 |
| NEPTUNE | ENSG00000119630 | PGF       | 1.75 | 1.02E-17 |
| NEPTUNE | ENSG00000169213 | RAB3B     | 1.75 | 5.99E-10 |
| NEPTUNE | ENSG00000151690 | MFSD6     | 1.75 | 3.98E-11 |
| NEPTUNE | ENSG00000144843 | ADPRH     | 1.75 | 8.93E-19 |
| NEPTUNE | ENSG00000106868 | SUSD1     | 1.75 | 1.56E-17 |
| NEPTUNE | ENSG00000174348 | PODN      | 1.75 | 1.29E-12 |
| NEPTUNE | ENSG00000152611 | CAPSL     | 1.75 | 6.52E-20 |
| NEPTUNE | ENSG00000124067 | SLC12A4   | 1.75 | 7.37E-17 |
| NEPTUNE | ENSG00000228262 | LINC01320 | 1.75 | 3.46E-10 |
| NEPTUNE | ENSG00000077152 | UBE2T     | 1.75 | 4.21E-19 |
| NEPTUNE | ENSG00000125384 | PTGER2    | 1.75 | 4.27E-14 |
| NEPTUNE | ENSG00000114251 | WNT5A     | 1.75 | 1.06E-12 |



|         |                 |           |      |          |
|---------|-----------------|-----------|------|----------|
| NEPTUNE | ENSG00000139146 | SINHCAF   | 1.75 | 3.51E-28 |
| NEPTUNE | ENSG00000251003 | ZFPM2-AS1 | 1.75 | 1.23E-21 |
| NEPTUNE | ENSG00000115594 | IL1R1     | 1.75 | 2.45E-15 |
| NEPTUNE | ENSG00000001626 | CFTR      | 1.75 | 4.53E-11 |
| NEPTUNE | ENSG00000064300 | NGFR      | 1.75 | 2.43E-18 |
| NEPTUNE | ENSG00000171310 | CHST11    | 1.75 | 1.28E-13 |
| NEPTUNE | ENSG00000140937 | CDH11     | 1.75 | 1.10E-13 |
| NEPTUNE | ENSG00000157445 | CACNA2D3  | 1.75 | 5.53E-13 |
| NEPTUNE | ENSG00000168917 | SLC35G2   | 1.75 | 3.03E-19 |
| NEPTUNE | ENSG00000033327 | GAB2      | 1.75 | 4.65E-23 |
| NEPTUNE | ENSG00000164054 | SHISA5    | 1.75 | 4.01E-32 |
| NEPTUNE | ENSG00000112699 | GMDS      | 1.75 | 1.34E-23 |
| NEPTUNE | ENSG00000177181 | RIMKLA    | 1.75 | 8.43E-16 |
| NEPTUNE | ENSG00000165125 | TRPV6     | 1.75 | 1.59E-13 |
| NEPTUNE | ENSG00000143333 | RGS16     | 1.75 | 1.13E-15 |
| NEPTUNE | ENSG00000139880 | CDH24     | 1.75 | 3.63E-17 |
| NEPTUNE | ENSG00000127955 | GNAI1     | 1.76 | 4.80E-15 |
| NEPTUNE | ENSG00000165816 | VWA2      | 1.76 | 4.46E-24 |
| NEPTUNE | ENSG00000154548 | SRSF12    | 1.76 | 2.73E-23 |
| NEPTUNE | ENSG00000089041 | P2RX7     | 1.76 | 8.53E-17 |
| NEPTUNE | ENSG00000135919 | SERPINE2  | 1.76 | 5.65E-11 |
| NEPTUNE | ENSG00000009790 | TRAF3IP3  | 1.76 | 8.10E-10 |
| NEPTUNE | ENSG00000137804 | NUSAP1    | 1.76 | 3.32E-11 |
| NEPTUNE | ENSG00000180801 | ARSJ      | 1.76 | 2.25E-20 |
| NEPTUNE | ENSG00000123360 | PDE1B     | 1.76 | 8.17E-18 |
| NEPTUNE | ENSG00000109674 | NEIL3     | 1.76 | 6.41E-15 |
| NEPTUNE | ENSG00000154065 | ANKRD29   | 1.76 | 4.48E-12 |
| NEPTUNE | ENSG00000263528 | IKBKE     | 1.76 | 1.56E-17 |
| NEPTUNE | ENSG00000234184 | LINC01781 | 1.76 | 2.46E-09 |
| NEPTUNE | ENSG00000166130 | IKBIP     | 1.76 | 2.32E-29 |
| NEPTUNE | ENSG00000196511 | TPK1      | 1.76 | 2.00E-23 |
| NEPTUNE | ENSG00000141574 | SECTM1    | 1.76 | 2.15E-10 |
| NEPTUNE | ENSG00000119865 | CNRIP1    | 1.76 | 5.09E-18 |
| NEPTUNE | ENSG00000106683 | LIMK1     | 1.76 | 1.80E-19 |
| NEPTUNE | ENSG00000117984 | CTSD      | 1.76 | 2.28E-21 |
| NEPTUNE | ENSG00000135914 | HTR2B     | 1.76 | 1.16E-19 |
| NEPTUNE | ENSG00000213694 | S1PR3     | 1.77 | 4.69E-11 |
| NEPTUNE | ENSG00000087495 | PHACTR3   | 1.77 | 2.72E-15 |
| NEPTUNE | ENSG00000109272 | PF4V1     | 1.77 | 5.18E-22 |
| NEPTUNE | ENSG00000095587 | TLL2      | 1.77 | 7.77E-23 |
| NEPTUNE | ENSG00000143147 | GPR161    | 1.77 | 2.36E-22 |
| NEPTUNE | ENSG00000089472 | HEPH      | 1.77 | 3.68E-12 |
| NEPTUNE | ENSG00000100100 | PIK3IP1   | 1.77 | 3.90E-15 |
| NEPTUNE | ENSG00000160447 | PKN3      | 1.77 | 2.50E-21 |
| NEPTUNE | ENSG00000184497 | TMEM255B  | 1.77 | 1.03E-19 |
| NEPTUNE | ENSG00000143878 | RHOB      | 1.77 | 9.81E-20 |
| NEPTUNE | ENSG00000181381 | DDX60L    | 1.77 | 2.31E-17 |
| NEPTUNE | ENSG00000145850 | TIMD4     | 1.77 | 9.62E-12 |
| NEPTUNE | ENSG00000148841 | ITPRIP    | 1.77 | 7.34E-14 |
| NEPTUNE | ENSG00000137507 | LRRC32    | 1.77 | 2.20E-16 |
| NEPTUNE | ENSG00000137478 | FCHSD2    | 1.77 | 1.50E-20 |
| NEPTUNE | ENSG00000155629 | PIK3AP1   | 1.77 | 2.21E-11 |
| NEPTUNE | ENSG00000152076 | CCDC74B   | 1.77 | 1.53E-20 |

|         |                  |                          |      |          |
|---------|------------------|--------------------------|------|----------|
| NEPTUNE | ENSG00000019144  | PHLDB1                   | 1.78 | 4.90E-21 |
| NEPTUNE | ENSG000000141756 | FKBP10                   | 1.78 | 1.30E-19 |
| NEPTUNE | ENSG000000187741 | FANCA                    | 1.78 | 1.44E-20 |
| NEPTUNE | ENSG000000129682 | FGF13                    | 1.78 | 1.09E-23 |
| NEPTUNE | ENSG000000105609 | LILRB5                   | 1.78 | 3.72E-18 |
| NEPTUNE | ENSG000000091651 | ORC6                     | 1.78 | 2.83E-20 |
| NEPTUNE | ENSG000000162929 | SANBR                    | 1.78 | 8.93E-22 |
| NEPTUNE | ENSG000000076003 | MCM6                     | 1.78 | 7.98E-20 |
| NEPTUNE | ENSG000000078018 | MAP2                     | 1.78 | 7.96E-14 |
| NEPTUNE | ENSG000000144369 | FAM171B                  | 1.78 | 6.01E-21 |
| NEPTUNE | ENSG000000140848 | CPNE2                    | 1.78 | 7.47E-09 |
| NEPTUNE | ENSG000000118898 | PPL                      | 1.78 | 7.85E-12 |
| NEPTUNE | ENSG000000132321 | IQCA1                    | 1.78 | 1.21E-18 |
| NEPTUNE | ENSG000000138835 | RGS3                     | 1.78 | 4.51E-15 |
| NEPTUNE | ENSG000000143248 | RGS5                     | 1.78 | 5.02E-09 |
| NEPTUNE | ENSG000000135218 | CD36                     | 1.78 | 1.67E-08 |
| NEPTUNE | ENSG000000197646 | PDCD1LG2                 | 1.78 | 2.37E-20 |
| NEPTUNE | ENSG000000116574 | RHOA                     | 1.78 | 4.59E-19 |
| NEPTUNE | ENSG000000181467 | RAP2B                    | 1.78 | 1.50E-23 |
| NEPTUNE | ENSG000000182162 | P2RY8                    | 1.78 | 3.20E-12 |
| NEPTUNE | ENSG000000128394 | APOBEC3F                 | 1.78 | 9.36E-22 |
| NEPTUNE | ENSG000000168268 | NT5DC2                   | 1.78 | 3.74E-13 |
| NEPTUNE | ENSG000000112183 | RBM24                    | 1.79 | 7.44E-23 |
| NEPTUNE | ENSG000000156515 | HK1                      | 1.79 | 3.12E-14 |
| NEPTUNE | ENSG000000103710 | RASL12                   | 1.79 | 1.14E-19 |
| NEPTUNE | ENSG000000129534 | MIS18BP1                 | 1.79 | 3.38E-21 |
| NEPTUNE | ENSG000000110697 | PITPNM1                  | 1.79 | 2.39E-11 |
| NEPTUNE | ENSG000000170004 | CHD3                     | 1.79 | 9.03E-21 |
| NEPTUNE | ENSG000000104722 | NEFM                     | 1.79 | 1.06E-19 |
| NEPTUNE | ENSG000000138031 | ADCY3                    | 1.79 | 3.47E-19 |
| NEPTUNE | ENSG000000004660 | CAMKK1                   | 1.79 | 7.22E-27 |
| NEPTUNE | ENSG000000104140 | RHOV                     | 1.79 | 3.89E-21 |
| NEPTUNE | ENSG000000173821 | RNF213                   | 1.79 | 8.38E-21 |
| NEPTUNE | ENSG000000125810 | CD93                     | 1.79 | 1.53E-17 |
| NEPTUNE | ENSG000000188643 | S100A16                  | 1.79 | 3.06E-33 |
| NEPTUNE | ENSG000000164128 | NPY1R                    | 1.79 | 9.56E-14 |
| NEPTUNE | ENSG000000129219 | PLD2                     | 1.79 | 1.95E-22 |
| NEPTUNE | ENSG000000204580 | DDR1                     | 1.79 | 2.47E-18 |
| NEPTUNE | ENSG000000130055 | GDPD2                    | 1.79 | 4.11E-14 |
| NEPTUNE | ENSG000000081189 | MEF2C                    | 1.79 | 8.81E-14 |
| NEPTUNE | ENSG000000169085 | VXN                      | 1.79 | 7.40E-15 |
| NEPTUNE | ENSG000000156970 | BUB1B                    | 1.79 | 2.73E-15 |
| NEPTUNE | ENSG000000175471 | MCTP1                    | 1.79 | 1.28E-15 |
| NEPTUNE | ENSG000000057657 | PRDM1                    | 1.79 | 8.31E-20 |
| NEPTUNE | ENSG000000127334 | DYRK2                    | 1.79 | 9.84E-18 |
| NEPTUNE | ENSG00000013619  | MAMLD1                   | 1.79 | 3.38E-21 |
| NEPTUNE | ENSG000000105131 | EPHX3                    | 1.80 | 2.02E-17 |
| NEPTUNE | ENSG000000162576 | MXRA8                    | 1.80 | 2.73E-13 |
| NEPTUNE | ENSG000000266338 | NBPF10 (includes others) | 1.80 | 1.69E-17 |
| NEPTUNE | ENSG000000114923 | SLC4A3                   | 1.80 | 4.48E-19 |
| NEPTUNE | ENSG00000019991  | HGF                      | 1.80 | 2.87E-12 |
| NEPTUNE | ENSG000000130309 | COLGALT1                 | 1.80 | 6.05E-14 |
| NEPTUNE | ENSG000000114554 | PLXNA1                   | 1.80 | 1.25E-21 |

|         |                 |              |      |          |
|---------|-----------------|--------------|------|----------|
| NEPTUNE | ENSG00000183010 | PYCR1        | 1.80 | 9.01E-21 |
| NEPTUNE | ENSG00000162073 | PAQR4        | 1.80 | 2.27E-18 |
| NEPTUNE | ENSG00000142733 | MAP3K6       | 1.80 | 4.35E-10 |
| NEPTUNE | ENSG00000116991 | SIPA1L2      | 1.80 | 4.11E-16 |
| NEPTUNE | ENSG00000150782 | IL18         | 1.80 | 3.54E-18 |
| NEPTUNE | ENSG00000065717 | TLE2         | 1.80 | 6.36E-12 |
| NEPTUNE | ENSG00000162711 | NLRP3        | 1.80 | 4.93E-22 |
| NEPTUNE | ENSG00000166025 | AMOTL1       | 1.80 | 3.48E-21 |
| NEPTUNE | ENSG00000027075 | PRKCH        | 1.80 | 3.82E-17 |
| NEPTUNE | ENSG00000198846 | TOX          | 1.80 | 2.71E-13 |
| NEPTUNE | ENSG00000115163 | CENPA        | 1.80 | 1.35E-16 |
| NEPTUNE | ENSG00000172175 | MALT1        | 1.80 | 3.53E-18 |
| NEPTUNE | ENSG00000164649 | CDCA7L       | 1.80 | 4.86E-20 |
| NEPTUNE | ENSG00000259275 | RP11_522B153 | 1.80 | 1.17E-26 |
| NEPTUNE | ENSG00000066697 | MSANTD3      | 1.80 | 4.24E-27 |
| NEPTUNE | ENSG00000121858 | TNFSF10      | 1.80 | 4.20E-11 |
| NEPTUNE | ENSG00000104341 | LAPTM4B      | 1.80 | 1.39E-23 |
| NEPTUNE | ENSG00000163082 | SGPP2        | 1.80 | 3.27E-12 |
| NEPTUNE | ENSG00000006453 | BAIAP2L1     | 1.80 | 6.13E-23 |
| NEPTUNE | ENSG00000142945 | KIF2C        | 1.80 | 3.27E-16 |
| NEPTUNE | ENSG00000088882 | CPXM1        | 1.81 | 1.96E-06 |
| NEPTUNE | ENSG00000099256 | PRTFDC1      | 1.81 | 8.88E-23 |
| NEPTUNE | ENSG00000105612 | DNASE2       | 1.81 | 2.47E-21 |
| NEPTUNE | ENSG00000100906 | NFKBIA       | 1.81 | 1.00E-22 |
| NEPTUNE | ENSG00000164116 | GUCY1A1      | 1.81 | 6.61E-24 |
| NEPTUNE | ENSG00000163075 | CFAP221      | 1.81 | 1.09E-26 |
| NEPTUNE | ENSG00000198055 | GRK6         | 1.81 | 2.11E-07 |
| NEPTUNE | ENSG00000095015 | MAP3K1       | 1.81 | 1.77E-17 |
| NEPTUNE | ENSG00000124508 | BTN2A2       | 1.81 | 1.89E-25 |
| NEPTUNE | ENSG00000182179 | UBA7         | 1.81 | 9.93E-20 |
| NEPTUNE | ENSG00000213853 | EMP2         | 1.81 | 9.47E-17 |
| NEPTUNE | ENSG00000150687 | PRSS23       | 1.81 | 6.33E-21 |
| NEPTUNE | ENSG00000204525 | HLA-C        | 1.81 | 7.15E-21 |
| NEPTUNE | ENSG00000163803 | PLB1         | 1.81 | 1.60E-24 |
| NEPTUNE | ENSG00000156711 | MAPK13       | 1.81 | 8.09E-23 |
| NEPTUNE | ENSG00000071054 | MAP4K4       | 1.81 | 8.88E-15 |
| NEPTUNE | ENSG00000110002 | VWA5A        | 1.81 | 8.01E-20 |
| NEPTUNE | ENSG00000065675 | PRKCQ        | 1.81 | 6.51E-11 |
| NEPTUNE | ENSG00000076716 | GPC4         | 1.81 | 3.81E-15 |
| NEPTUNE | ENSG00000156510 | HKDC1        | 1.81 | 9.99E-09 |
| NEPTUNE | ENSG00000112562 | SMOC2        | 1.81 | 1.69E-10 |
| NEPTUNE | ENSG00000007237 | GAS7         | 1.81 | 2.13E-17 |
| NEPTUNE | ENSG00000077782 | FGFR1        | 1.81 | 1.63E-16 |
| NEPTUNE | ENSG00000134285 | FKBP11       | 1.81 | 3.60E-22 |
| NEPTUNE | ENSG00000116260 | QSOX1        | 1.82 | 3.29E-21 |
| NEPTUNE | ENSG00000237172 | B3GNT9       | 1.82 | 5.09E-16 |
| NEPTUNE | ENSG00000205078 | SYCE1L       | 1.82 | 7.28E-24 |
| NEPTUNE | ENSG00000162614 | NEXN         | 1.82 | 3.16E-18 |
| NEPTUNE | ENSG00000233834 | MACC1-DT     | 1.82 | 8.26E-16 |
| NEPTUNE | ENSG00000103569 | AQP9         | 1.82 | 2.55E-22 |
| NEPTUNE | ENSG00000241644 | INMT         | 1.82 | 9.15E-11 |
| NEPTUNE | ENSG00000091592 | NLRP1        | 1.82 | 1.92E-15 |
| NEPTUNE | ENSG00000138496 | PARP9        | 1.82 | 1.85E-19 |

|         |                 |          |      |          |
|---------|-----------------|----------|------|----------|
| NEPTUNE | ENSG00000160180 | TFF3     | 1.82 | 7.28E-14 |
| NEPTUNE | ENSG00000145050 | MANF     | 1.82 | 1.18E-22 |
| NEPTUNE | ENSG00000072786 | STK10    | 1.82 | 4.39E-19 |
| NEPTUNE | ENSG00000162849 | KIF26B   | 1.82 | 1.89E-18 |
| NEPTUNE | ENSG00000140280 | LYSMD2   | 1.82 | 8.65E-15 |
| NEPTUNE | ENSG00000160013 | PTGIR    | 1.83 | 2.52E-21 |
| NEPTUNE | ENSG00000144218 | AFF3     | 1.83 | 1.36E-19 |
| NEPTUNE | ENSG00000197879 | MYO1C    | 1.83 | 1.62E-17 |
| NEPTUNE | ENSG00000167797 | CDK2AP2  | 1.83 | 5.15E-24 |
| NEPTUNE | ENSG00000177409 | SAMD9L   | 1.83 | 1.05E-18 |
| NEPTUNE | ENSG00000188883 | KLRG2    | 1.83 | 1.24E-11 |
| NEPTUNE | ENSG00000134853 | PDGFRA   | 1.83 | 7.22E-12 |
| NEPTUNE | ENSG00000103145 | HCFC1R1  | 1.83 | 4.37E-28 |
| NEPTUNE | ENSG00000157557 | ETS2     | 1.83 | 1.72E-23 |
| NEPTUNE | ENSG00000103742 | IGDCC4   | 1.83 | 3.89E-26 |
| NEPTUNE | ENSG00000172031 | EPHX4    | 1.83 | 2.98E-20 |
| NEPTUNE | ENSG00000127920 | GNG11    | 1.83 | 1.15E-19 |
| NEPTUNE | ENSG00000049323 | LTBP1    | 1.83 | 2.99E-10 |
| NEPTUNE | ENSG00000156802 | ATAD2    | 1.83 | 2.31E-19 |
| NEPTUNE | ENSG00000113749 | HRH2     | 1.83 | 2.87E-23 |
| NEPTUNE | ENSG00000179144 | GIMAP7   | 1.83 | 7.39E-19 |
| NEPTUNE | ENSG00000149418 | ST14     | 1.83 | 1.30E-10 |
| NEPTUNE | ENSG00000079462 | PAFAH1B3 | 1.83 | 3.43E-31 |
| NEPTUNE | ENSG00000115325 | DOK1     | 1.83 | 1.30E-26 |
| NEPTUNE | ENSG00000156218 | ADAMTSL3 | 1.83 | 1.94E-12 |
| NEPTUNE | ENSG00000079819 | EPB41L2  | 1.83 | 3.17E-21 |
| NEPTUNE | ENSG00000184349 | EFNA5    | 1.84 | 2.31E-16 |
| NEPTUNE | ENSG00000162783 | IER5     | 1.84 | 1.06E-12 |
| NEPTUNE | ENSG00000138587 | MNS1     | 1.84 | 1.79E-19 |
| NEPTUNE | ENSG00000140367 | UBE2Q2   | 1.84 | 6.81E-24 |
| NEPTUNE | ENSG00000171488 | LRRC8C   | 1.84 | 1.49E-21 |
| NEPTUNE | ENSG00000142910 | TINAGL1  | 1.84 | 6.42E-12 |
| NEPTUNE | ENSG00000256229 | ZNF486   | 1.84 | 1.44E-12 |
| NEPTUNE | ENSG00000198796 | ALPK2    | 1.84 | 2.21E-08 |
| NEPTUNE | ENSG00000243701 | DUBR     | 1.84 | 1.22E-25 |
| NEPTUNE | ENSG00000090889 | KIF4A    | 1.84 | 2.65E-17 |
| NEPTUNE | ENSG00000231925 | TAPBP    | 1.84 | 5.81E-19 |
| NEPTUNE | ENSG00000134321 | RSAD2    | 1.84 | 1.42E-08 |
| NEPTUNE | ENSG00000213977 | TAX1BP3  | 1.84 | 6.46E-30 |
| NEPTUNE | ENSG00000121152 | NCAPH    | 1.84 | 1.52E-22 |
| NEPTUNE | ENSG00000106952 | TNFSF8   | 1.84 | 2.37E-21 |
| NEPTUNE | ENSG00000117318 | ID3      | 1.84 | 4.73E-17 |
| NEPTUNE | ENSG00000133083 | DCLK1    | 1.84 | 2.95E-22 |
| NEPTUNE | ENSG00000109089 | CDR2L    | 1.84 | 5.43E-23 |
| NEPTUNE | ENSG00000067445 | TRO      | 1.84 | 2.93E-18 |
| NEPTUNE | ENSG00000134901 | POGLUT2  | 1.84 | 4.90E-24 |
| NEPTUNE | ENSG00000159259 | CHAF1B   | 1.84 | 2.50E-23 |
| NEPTUNE | ENSG00000132932 | ATP8A2   | 1.84 | 3.51E-22 |
| NEPTUNE | ENSG00000181104 | F2R      | 1.84 | 2.54E-13 |
| NEPTUNE | ENSG00000132530 | XAF1     | 1.85 | 3.80E-15 |
| NEPTUNE | ENSG00000102554 | KLF5     | 1.85 | 5.77E-11 |
| NEPTUNE | ENSG00000067225 | PKM      | 1.85 | 2.03E-21 |
| NEPTUNE | ENSG00000116711 | PLA2G4A  | 1.85 | 6.63E-15 |

|         |                 |              |      |          |
|---------|-----------------|--------------|------|----------|
| NEPTUNE | ENSG00000227036 | LINC00511    | 1.85 | 5.97E-22 |
| NEPTUNE | ENSG00000106665 | CLIP2        | 1.85 | 9.06E-17 |
| NEPTUNE | ENSG00000197457 | STMN3        | 1.85 | 2.16E-21 |
| NEPTUNE | ENSG00000146192 | FGD2         | 1.85 | 1.58E-22 |
| NEPTUNE | ENSG00000213424 | KRT222       | 1.85 | 1.50E-25 |
| NEPTUNE | ENSG00000095370 | SH2D3C       | 1.85 | 8.02E-18 |
| NEPTUNE | ENSG00000109854 | HTATIP2      | 1.85 | 1.96E-21 |
| NEPTUNE | ENSG00000131037 | EPS8L1       | 1.85 | 7.59E-14 |
| NEPTUNE | ENSG00000146267 | FAXC         | 1.85 | 6.08E-22 |
| NEPTUNE | ENSG00000121005 | CRISPLD1     | 1.85 | 2.85E-17 |
| NEPTUNE | ENSG00000143515 | ATP8B2       | 1.85 | 1.14E-18 |
| NEPTUNE | ENSG00000134954 | ETS1         | 1.85 | 1.43E-22 |
| NEPTUNE | ENSG00000183036 | PCP4         | 1.85 | 2.11E-06 |
| NEPTUNE | ENSG00000170458 | CD14         | 1.85 | 3.24E-19 |
| NEPTUNE | ENSG00000112343 | TRIM38       | 1.85 | 1.08E-28 |
| NEPTUNE | ENSG00000164056 | SPRY1        | 1.85 | 1.27E-23 |
| NEPTUNE | ENSG00000163689 | CFAP20DC     | 1.85 | 2.97E-27 |
| NEPTUNE | ENSG00000119403 | PHF19        | 1.85 | 2.44E-24 |
| NEPTUNE | ENSG00000105499 | PLA2G4C      | 1.85 | 9.87E-11 |
| NEPTUNE | ENSG00000117632 | STMN1        | 1.85 | 1.99E-32 |
| NEPTUNE | ENSG00000181830 | SLC35C1      | 1.85 | 1.41E-27 |
| NEPTUNE | ENSG00000164318 | EGFLAM       | 1.85 | 2.26E-15 |
| NEPTUNE | ENSG00000129675 | ARHGEF6      | 1.85 | 1.21E-15 |
| NEPTUNE | ENSG00000024526 | DEPDC1       | 1.86 | 1.01E-15 |
| NEPTUNE | ENSG00000127528 | KLF2         | 1.86 | 1.62E-09 |
| NEPTUNE | ENSG00000109846 | CRYAB        | 1.86 | 1.03E-08 |
| NEPTUNE | ENSG00000168234 | TTC39C       | 1.86 | 1.99E-25 |
| NEPTUNE | ENSG00000240184 | PCDHGC3      | 1.86 | 1.58E-14 |
| NEPTUNE | ENSG00000017483 | SLC38A5      | 1.86 | 1.31E-23 |
| NEPTUNE | ENSG00000132470 | ITGB4        | 1.86 | 2.05E-17 |
| NEPTUNE | ENSG00000068001 | HYAL2        | 1.86 | 4.70E-34 |
| NEPTUNE | ENSG00000100106 | TRIOBP       | 1.86 | 6.71E-16 |
| NEPTUNE | ENSG00000145365 | TIFA         | 1.86 | 4.44E-26 |
| NEPTUNE | ENSG00000213719 | CLIC1        | 1.86 | 9.46E-38 |
| NEPTUNE | ENSG00000170989 | S1PR1        | 1.86 | 3.33E-19 |
| NEPTUNE | ENSG00000108798 | ABI3         | 1.86 | 1.75E-15 |
| NEPTUNE | ENSG00000105514 | RAB3D        | 1.86 | 3.21E-23 |
| NEPTUNE | ENSG00000155849 | ELMO1        | 1.86 | 2.63E-17 |
| NEPTUNE | ENSG00000119280 | C1orf198     | 1.86 | 3.15E-22 |
| NEPTUNE | ENSG00000111834 | RSPH4A       | 1.86 | 1.11E-25 |
| NEPTUNE | ENSG00000137033 | IL33         | 1.87 | 1.30E-10 |
| NEPTUNE | ENSG00000261801 | LOXL1-AS1    | 1.87 | 1.46E-20 |
| NEPTUNE | ENSG00000247596 | TWF2         | 1.87 | 1.34E-33 |
| NEPTUNE | ENSG00000150093 | ITGB1        | 1.87 | 1.07E-20 |
| NEPTUNE | ENSG00000196405 | EVL          | 1.87 | 4.91E-21 |
| NEPTUNE | ENSG00000102057 | KCND1        | 1.87 | 7.64E-28 |
| NEPTUNE | ENSG00000122824 | NUDT10       | 1.87 | 7.82E-19 |
| NEPTUNE | ENSG00000135622 | SEMA4F       | 1.87 | 9.84E-22 |
| NEPTUNE | ENSG00000051180 | RAD51        | 1.87 | 9.72E-21 |
| NEPTUNE | ENSG00000127507 | ADGRE2       | 1.88 | 2.10E-30 |
| NEPTUNE | ENSG00000171617 | ENC1         | 1.88 | 3.29E-22 |
| NEPTUNE | ENSG00000260244 | RP11_588K222 | 1.88 | 1.51E-17 |
| NEPTUNE | ENSG00000129654 | FOXJ1        | 1.88 | 3.81E-14 |

|         |                 |          |      |          |
|---------|-----------------|----------|------|----------|
| NEPTUNE | ENSG00000168016 | TRANK1   | 1.88 | 3.17E-18 |
| NEPTUNE | ENSG00000136026 | CKAP4    | 1.88 | 6.53E-16 |
| NEPTUNE | ENSG00000176435 | CLEC14A  | 1.88 | 2.78E-18 |
| NEPTUNE | ENSG00000158270 | COLEC12  | 1.88 | 9.06E-15 |
| NEPTUNE | ENSG00000261371 | PECAM1   | 1.88 | 7.62E-16 |
| NEPTUNE | ENSG00000213186 | TRIM59   | 1.88 | 8.77E-24 |
| NEPTUNE | ENSG00000101187 | SLCO4A1  | 1.88 | 2.31E-06 |
| NEPTUNE | ENSG00000134504 | KCTD1    | 1.88 | 1.24E-25 |
| NEPTUNE | ENSG00000141429 | GALNT1   | 1.88 | 6.72E-12 |
| NEPTUNE | ENSG00000133574 | GIMAP4   | 1.88 | 5.18E-21 |
| NEPTUNE | ENSG00000184009 | ACTG1    | 1.88 | 2.70E-28 |
| NEPTUNE | ENSG00000065989 | PDE4A    | 1.88 | 1.36E-19 |
| NEPTUNE | ENSG00000177096 | PHETA2   | 1.88 | 3.52E-26 |
| NEPTUNE | ENSG00000010610 | CD4      | 1.88 | 6.69E-13 |
| NEPTUNE | ENSG00000167861 | HID1     | 1.88 | 1.34E-19 |
| NEPTUNE | ENSG00000213923 | CSNK1E   | 1.88 | 1.24E-18 |
| NEPTUNE | ENSG00000143507 | DUSP10   | 1.88 | 2.55E-23 |
| NEPTUNE | ENSG00000104549 | SQLE     | 1.88 | 2.36E-22 |
| NEPTUNE | ENSG00000123219 | CENPK    | 1.88 | 2.08E-22 |
| NEPTUNE | ENSG00000153814 | JAZF1    | 1.88 | 3.76E-22 |
| NEPTUNE | ENSG00000168743 | NPNT     | 1.88 | 4.55E-12 |
| NEPTUNE | ENSG00000107562 | CXCL12   | 1.88 | 4.89E-12 |
| NEPTUNE | ENSG00000151468 | CCDC3    | 1.89 | 5.00E-11 |
| NEPTUNE | ENSG00000182132 | KCNIP1   | 1.89 | 3.70E-11 |
| NEPTUNE | ENSG00000196628 | TCF4     | 1.89 | 1.20E-18 |
| NEPTUNE | ENSG00000116584 | ARHGEF2  | 1.89 | 1.39E-26 |
| NEPTUNE | ENSG00000146285 | SCML4    | 1.89 | 1.32E-20 |
| NEPTUNE | ENSG00000087116 | ADAMTS2  | 1.89 | 6.82E-24 |
| NEPTUNE | ENSG00000105355 | PLIN3    | 1.89 | 5.09E-26 |
| NEPTUNE | ENSG00000152669 | CCNO     | 1.89 | 1.82E-16 |
| NEPTUNE | ENSG00000165929 | TC2N     | 1.89 | 1.26E-15 |
| NEPTUNE | ENSG00000160991 | ORAI2    | 1.89 | 8.00E-23 |
| NEPTUNE | ENSG00000138448 | ITGAV    | 1.89 | 5.51E-23 |
| NEPTUNE | ENSG00000164111 | ANXA5    | 1.89 | 9.16E-40 |
| NEPTUNE | ENSG00000128656 | CHN1     | 1.89 | 8.15E-22 |
| NEPTUNE | ENSG00000177675 | CD163L1  | 1.89 | 1.86E-19 |
| NEPTUNE | ENSG00000109805 | NCAPG    | 1.89 | 5.71E-14 |
| NEPTUNE | ENSG00000124126 | PREX1    | 1.89 | 3.03E-14 |
| NEPTUNE | ENSG00000110841 | PPFIBP1  | 1.89 | 1.41E-21 |
| NEPTUNE | ENSG00000164088 | PPM1M    | 1.89 | 1.38E-17 |
| NEPTUNE | ENSG00000137310 | TCF19    | 1.90 | 1.54E-17 |
| NEPTUNE | ENSG00000101096 | NFATC2   | 1.90 | 7.89E-20 |
| NEPTUNE | ENSG00000003096 | KLHL13   | 1.90 | 2.78E-20 |
| NEPTUNE | ENSG00000138134 | STAMBPL1 | 1.90 | 1.07E-24 |
| NEPTUNE | ENSG00000167972 | ABCA3    | 1.90 | 3.92E-19 |
| NEPTUNE | ENSG00000168476 | REEP4    | 1.90 | 2.24E-26 |
| NEPTUNE | ENSG00000130511 | SSBP4    | 1.90 | 2.58E-14 |
| NEPTUNE | ENSG00000151835 | SACS     | 1.90 | 5.33E-21 |
| NEPTUNE | ENSG00000166963 | MAP1A    | 1.90 | 1.86E-20 |
| NEPTUNE | ENSG00000149557 | FEZ1     | 1.90 | 1.93E-23 |
| NEPTUNE | ENSG00000124143 | ARHGAP40 | 1.90 | 2.14E-19 |
| NEPTUNE | ENSG00000105520 | PLPPR2   | 1.90 | 2.59E-25 |
| NEPTUNE | ENSG00000183615 | FAM167B  | 1.90 | 3.36E-21 |

|         |                 |          |      |          |
|---------|-----------------|----------|------|----------|
| NEPTUNE | ENSG00000128284 | APOL3    | 1.90 | 2.74E-26 |
| NEPTUNE | ENSG00000138376 | BARD1    | 1.90 | 2.66E-21 |
| NEPTUNE | ENSG00000172932 | ANKRD13D | 1.90 | 2.95E-27 |
| NEPTUNE | ENSG00000059378 | PARP12   | 1.90 | 6.81E-09 |
| NEPTUNE | ENSG00000107518 | ATRNL1   | 1.91 | 1.62E-21 |
| NEPTUNE | ENSG00000174600 | CMKLR1   | 1.91 | 2.71E-16 |
| NEPTUNE | ENSG00000170542 | SERPINB9 | 1.91 | 7.83E-21 |
| NEPTUNE | ENSG00000152402 | GUCY1A2  | 1.91 | 1.25E-11 |
| NEPTUNE | ENSG00000094804 | CDC6     | 1.91 | 9.63E-14 |
| NEPTUNE | ENSG00000171320 | ESCO2    | 1.91 | 1.94E-16 |
| NEPTUNE | ENSG00000103966 | EHD4     | 1.91 | 1.95E-26 |
| NEPTUNE | ENSG00000143320 | CRABP2   | 1.91 | 2.52E-12 |
| NEPTUNE | ENSG00000198074 | AKR1B10  | 1.91 | 3.95E-04 |
| NEPTUNE | ENSG00000101955 | SRPX     | 1.91 | 2.91E-18 |
| NEPTUNE | ENSG00000178726 | THBD     | 1.91 | 2.47E-16 |
| NEPTUNE | ENSG00000244694 | PTCHD4   | 1.91 | 4.78E-18 |
| NEPTUNE | ENSG00000125245 | GPR18    | 1.91 | 2.77E-18 |
| NEPTUNE | ENSG00000166523 | CLEC4E   | 1.91 | 3.49E-27 |
| NEPTUNE | ENSG00000112096 | SOD2     | 1.91 | 1.06E-16 |
| NEPTUNE | ENSG00000116157 | GPX7     | 1.91 | 2.08E-25 |
| NEPTUNE | ENSG00000058668 | ATP2B4   | 1.91 | 6.91E-25 |
| NEPTUNE | ENSG00000111913 | RIPOR2   | 1.91 | 1.78E-15 |
| NEPTUNE | ENSG00000101000 | PROCR    | 1.91 | 5.08E-26 |
| NEPTUNE | ENSG00000122877 | EGR2     | 1.91 | 1.32E-22 |
| NEPTUNE | ENSG00000118156 | ZNF541   | 1.91 | 5.58E-10 |
| NEPTUNE | ENSG00000174640 | SLCO2A1  | 1.92 | 1.48E-12 |
| NEPTUNE | ENSG00000185033 | SEMA4B   | 1.92 | 1.95E-17 |
| NEPTUNE | ENSG00000139926 | FRMD6    | 1.92 | 5.17E-16 |
| NEPTUNE | ENSG00000100364 | KIAA0930 | 1.92 | 1.84E-25 |
| NEPTUNE | ENSG00000148154 | UGCG     | 1.92 | 2.16E-20 |
| NEPTUNE | ENSG00000178695 | KCTD12   | 1.92 | 3.03E-17 |
| NEPTUNE | ENSG00000117226 | GBP3     | 1.92 | 4.38E-11 |
| NEPTUNE | ENSG00000127951 | FGL2     | 1.92 | 1.51E-17 |
| NEPTUNE | ENSG00000183775 | KCTD16   | 1.92 | 6.08E-14 |
| NEPTUNE | ENSG00000139083 | ETV6     | 1.92 | 2.92E-31 |
| NEPTUNE | ENSG00000124429 | POF1B    | 1.92 | 6.35E-15 |
| NEPTUNE | ENSG00000082074 | FYB1     | 1.92 | 2.83E-18 |
| NEPTUNE | ENSG00000106462 | EZH2     | 1.92 | 9.34E-22 |
| NEPTUNE | ENSG00000064666 | CNN2     | 1.92 | 6.39E-25 |
| NEPTUNE | ENSG00000087085 | ACHE     | 1.92 | 2.77E-25 |
| NEPTUNE | ENSG00000144642 | RBMS3    | 1.92 | 6.93E-20 |
| NEPTUNE | ENSG00000196526 | AFAP1    | 1.93 | 7.72E-25 |
| NEPTUNE | ENSG00000109736 | MFSD10   | 1.93 | 8.39E-33 |
| NEPTUNE | ENSG00000163453 | IGFBP7   | 1.93 | 1.13E-22 |
| NEPTUNE | ENSG00000100300 | TSPO     | 1.93 | 8.10E-31 |
| NEPTUNE | ENSG00000108700 | CCL8     | 1.93 | 6.69E-18 |
| NEPTUNE | ENSG00000067955 | CBFB     | 1.93 | 9.02E-24 |
| NEPTUNE | ENSG00000112936 | C7       | 1.93 | 3.89E-09 |
| NEPTUNE | ENSG00000181374 | CCL13    | 1.93 | 3.87E-24 |
| NEPTUNE | ENSG00000213445 | SIPA1    | 1.93 | 1.95E-18 |
| NEPTUNE | ENSG00000173083 | HPSE     | 1.93 | 4.68E-21 |
| NEPTUNE | ENSG00000163040 | CCDC74A  | 1.93 | 3.25E-28 |
| NEPTUNE | ENSG00000119969 | HELLS    | 1.93 | 1.24E-24 |

|         |                 |            |      |          |
|---------|-----------------|------------|------|----------|
| NEPTUNE | ENSG00000147642 | SYBU       | 1.93 | 8.25E-14 |
| NEPTUNE | ENSG00000105339 | DENND3     | 1.93 | 1.83E-24 |
| NEPTUNE | ENSG00000159247 | TUBBP5     | 1.93 | 5.32E-12 |
| NEPTUNE | ENSG00000204472 | AIF1       | 1.93 | 1.13E-10 |
| NEPTUNE | ENSG00000112812 | PRSS16     | 1.93 | 1.83E-16 |
| NEPTUNE | ENSG00000166803 | PCLAF      | 1.93 | 4.75E-18 |
| NEPTUNE | ENSG00000105851 | PIK3CG     | 1.93 | 3.71E-22 |
| NEPTUNE | ENSG00000230438 | SERPINB9P1 | 1.93 | 1.79E-20 |
| NEPTUNE | ENSG00000197093 | GAL3ST4    | 1.93 | 5.03E-23 |
| NEPTUNE | ENSG00000176658 | MYO1D      | 1.93 | 1.34E-16 |
| NEPTUNE | ENSG00000157111 | TMEM171    | 1.93 | 8.57E-22 |
| NEPTUNE | ENSG00000181804 | SLC9A9     | 1.94 | 2.44E-18 |
| NEPTUNE | ENSG00000147408 | CSGALNACT1 | 1.94 | 3.10E-17 |
| NEPTUNE | ENSG00000133466 | C1QTNF6    | 1.94 | 6.84E-25 |
| NEPTUNE | ENSG00000130164 | LDLR       | 1.94 | 3.84E-12 |
| NEPTUNE | ENSG00000119866 | BCL11A     | 1.94 | 3.67E-24 |
| NEPTUNE | ENSG00000143217 | NECTIN4    | 1.94 | 5.76E-18 |
| NEPTUNE | ENSG00000114450 | GNB4       | 1.94 | 1.72E-21 |
| NEPTUNE | ENSG00000197905 | TEAD4      | 1.94 | 1.42E-21 |
| NEPTUNE | ENSG00000148702 | HABP2      | 1.94 | 4.73E-07 |
| NEPTUNE | ENSG00000123609 | NMI        | 1.94 | 9.22E-38 |
| NEPTUNE | ENSG00000105327 | BBC3       | 1.94 | 2.49E-31 |
| NEPTUNE | ENSG00000056558 | TRAF1      | 1.94 | 1.71E-16 |
| NEPTUNE | ENSG00000136193 | SCRN1      | 1.94 | 1.66E-16 |
| NEPTUNE | ENSG00000276600 | RAB7B      | 1.94 | 1.90E-26 |
| NEPTUNE | ENSG00000176907 | TCIM       | 1.94 | 6.91E-22 |
| NEPTUNE | ENSG00000151746 | BICD1      | 1.94 | 7.20E-24 |
| NEPTUNE | ENSG00000138166 | DUSP5      | 1.95 | 3.24E-21 |
| NEPTUNE | ENSG00000184574 | LPAR5      | 1.95 | 4.20E-19 |
| NEPTUNE | ENSG00000175928 | LRRN1      | 1.95 | 3.16E-20 |
| NEPTUNE | ENSG00000173193 | PARP14     | 1.95 | 4.59E-20 |
| NEPTUNE | ENSG00000171241 | SHCBP1     | 1.95 | 2.78E-16 |
| NEPTUNE | ENSG00000106483 | SFRP4      | 1.95 | 8.15E-08 |
| NEPTUNE | ENSG00000175505 | CLCF1      | 1.95 | 2.20E-31 |
| NEPTUNE | ENSG00000134602 | STK26      | 1.95 | 3.00E-20 |
| NEPTUNE | ENSG00000163576 | EFHB       | 1.95 | 3.05E-16 |
| NEPTUNE | ENSG00000082512 | TRAF5      | 1.95 | 4.16E-24 |
| NEPTUNE | ENSG00000003249 | DBNDD1     | 1.95 | 4.90E-23 |
| NEPTUNE | ENSG00000159388 | BTG2       | 1.95 | 1.88E-22 |
| NEPTUNE | ENSG00000166448 | TMEM130    | 1.95 | 2.86E-11 |
| NEPTUNE | ENSG00000131203 | IDO1       | 1.96 | 1.53E-18 |
| NEPTUNE | ENSG00000116132 | PRRX1      | 1.96 | 5.24E-18 |
| NEPTUNE | ENSG00000142149 | HUNK       | 1.96 | 8.31E-18 |
| NEPTUNE | ENSG00000155962 | CLIC2      | 1.96 | 7.50E-24 |
| NEPTUNE | ENSG00000167123 | CERCAM     | 1.96 | 1.33E-20 |
| NEPTUNE | ENSG00000177697 | CD151      | 1.96 | 1.17E-27 |
| NEPTUNE | ENSG00000063660 | GPC1       | 1.96 | 2.94E-19 |
| NEPTUNE | ENSG00000152253 | SPC25      | 1.96 | 5.59E-18 |
| NEPTUNE | ENSG00000099998 | GGT5       | 1.96 | 2.34E-15 |
| NEPTUNE | ENSG00000100450 | GZMH       | 1.96 | 1.40E-20 |
| NEPTUNE | ENSG00000112742 | TTK        | 1.96 | 2.67E-16 |
| NEPTUNE | ENSG00000138735 | PDE5A      | 1.96 | 1.97E-21 |
| NEPTUNE | ENSG00000152056 | AP1S3      | 1.96 | 2.28E-26 |



|         |                 |           |      |          |
|---------|-----------------|-----------|------|----------|
| NEPTUNE | ENSG00000152527 | PLEKHH2   | 1.96 | 1.44E-17 |
| NEPTUNE | ENSG00000150961 | SEC24D    | 1.96 | 6.18E-21 |
| NEPTUNE | ENSG00000104432 | IL7       | 1.96 | 2.22E-26 |
| NEPTUNE | ENSG00000165309 | ARMC3     | 1.96 | 1.68E-20 |
| NEPTUNE | ENSG00000135905 | DOCK10    | 1.96 | 1.06E-22 |
| NEPTUNE | ENSG00000158710 | TAGLN2    | 1.96 | 3.37E-38 |
| NEPTUNE | ENSG00000105655 | ISYNA1    | 1.96 | 2.34E-24 |
| NEPTUNE | ENSG00000237988 | OR211P    | 1.96 | 6.81E-15 |
| NEPTUNE | ENSG00000093072 | ADA2      | 1.96 | 5.55E-11 |
| NEPTUNE | ENSG00000235162 | C12orf75  | 1.97 | 1.64E-30 |
| NEPTUNE | ENSG00000183160 | TMEM119   | 1.97 | 2.80E-16 |
| NEPTUNE | ENSG00000143554 | SLC27A3   | 1.97 | 8.52E-23 |
| NEPTUNE | ENSG00000152804 | HHEX      | 1.97 | 6.03E-27 |
| NEPTUNE | ENSG00000152661 | GJA1      | 1.97 | 1.42E-17 |
| NEPTUNE | ENSG00000140464 | PML       | 1.97 | 1.86E-27 |
| NEPTUNE | ENSG00000168502 | MTCL1     | 1.97 | 1.33E-24 |
| NEPTUNE | ENSG00000197496 | SLC2A10   | 1.97 | 1.13E-19 |
| NEPTUNE | ENSG00000164125 | GASK1B    | 1.97 | 4.61E-17 |
| NEPTUNE | ENSG00000139641 | ESYT1     | 1.97 | 1.21E-22 |
| NEPTUNE | ENSG00000099250 | NRP1      | 1.97 | 2.92E-20 |
| NEPTUNE | ENSG00000143369 | ECM1      | 1.97 | 7.05E-15 |
| NEPTUNE | ENSG00000105854 | PON2      | 1.97 | 5.25E-31 |
| NEPTUNE | ENSG00000182481 | KPNA2     | 1.97 | 3.02E-24 |
| NEPTUNE | ENSG00000229891 | LINC01315 | 1.97 | 3.43E-24 |
| NEPTUNE | ENSG00000197965 | MPZL1     | 1.97 | 1.04E-27 |
| NEPTUNE | ENSG00000237541 | HLA-DQA2  | 1.97 | 8.24E-06 |
| NEPTUNE | ENSG00000168243 | GNG4      | 1.98 | 3.44E-10 |
| NEPTUNE | ENSG00000163840 | DTX3L     | 1.98 | 2.75E-23 |
| NEPTUNE | ENSG00000151883 | PARP8     | 1.98 | 7.55E-32 |
| NEPTUNE | ENSG00000170421 | KRT8      | 1.98 | 8.30E-24 |
| NEPTUNE | ENSG00000167693 | NXN       | 1.98 | 2.95E-16 |
| NEPTUNE | ENSG00000179583 | CIITA     | 1.98 | 1.09E-24 |
| NEPTUNE | ENSG00000170775 | GPR37     | 1.98 | 7.53E-25 |
| NEPTUNE | ENSG00000069431 | ABCC9     | 1.98 | 2.05E-18 |
| NEPTUNE | ENSG00000081059 | TCF7      | 1.98 | 4.34E-19 |
| NEPTUNE | ENSG00000182287 | AP1S2     | 1.98 | 5.89E-29 |
| NEPTUNE | ENSG00000149485 | FADS1     | 1.98 | 2.59E-25 |
| NEPTUNE | ENSG00000163817 | SLC6A20   | 1.98 | 3.27E-05 |
| NEPTUNE | ENSG00000136869 | TLR4      | 1.98 | 4.21E-18 |
| NEPTUNE | ENSG00000127564 | PKMYT1    | 1.98 | 1.57E-23 |
| NEPTUNE | ENSG00000124920 | MYRF      | 1.98 | 8.88E-30 |
| NEPTUNE | ENSG00000156136 | DCK       | 1.98 | 4.78E-33 |
| NEPTUNE | ENSG00000114115 | RBP1      | 1.98 | 9.53E-26 |
| NEPTUNE | ENSG00000196352 | CD55      | 1.98 | 1.84E-29 |
| NEPTUNE | ENSG00000166444 | DENND2B   | 1.98 | 3.39E-28 |
| NEPTUNE | ENSG00000034053 | APBA2     | 1.98 | 1.32E-24 |
| NEPTUNE | ENSG00000183831 | ANKRD45   | 1.98 | 7.31E-29 |
| NEPTUNE | ENSG00000173457 | PPP1R14B  | 1.98 | 5.40E-09 |
| NEPTUNE | ENSG00000133321 | PLAAT4    | 1.98 | 5.81E-19 |
| NEPTUNE | ENSG00000181458 | TMEM45A   | 1.98 | 1.55E-22 |
| NEPTUNE | ENSG00000057019 | DCBLD2    | 1.98 | 2.94E-26 |
| NEPTUNE | ENSG00000154380 | ENAH      | 1.98 | 8.22E-28 |
| NEPTUNE | ENSG00000049130 | KITLG     | 1.99 | 2.74E-22 |

|         |                 |              |      |          |
|---------|-----------------|--------------|------|----------|
| NEPTUNE | ENSG00000182667 | NTM          | 1.99 | 3.86E-23 |
| NEPTUNE | ENSG00000151725 | CENPU        | 1.99 | 4.78E-17 |
| NEPTUNE | ENSG00000090659 | CD209        | 1.99 | 8.89E-19 |
| NEPTUNE | ENSG00000144214 | LYG1         | 1.99 | 4.09E-07 |
| NEPTUNE | ENSG00000203706 | SERTAD4-AS1  | 1.99 | 2.44E-22 |
| NEPTUNE | ENSG00000103855 | CD276        | 1.99 | 4.24E-29 |
| NEPTUNE | ENSG00000129195 | PIMREG       | 1.99 | 4.36E-20 |
| NEPTUNE | ENSG00000160188 | RSPH1        | 1.99 | 3.99E-18 |
| NEPTUNE | ENSG00000196260 | SFTA2        | 1.99 | 2.20E-24 |
| NEPTUNE | ENSG00000179431 | FJX1         | 1.99 | 8.31E-15 |
| NEPTUNE | ENSG00000237649 | KIFC1        | 1.99 | 4.40E-15 |
| NEPTUNE | ENSG00000143476 | DTL          | 1.99 | 1.83E-14 |
| NEPTUNE | ENSG00000130176 | CNN1         | 1.99 | 6.45E-10 |
| NEPTUNE | ENSG00000155850 | SLC26A2      | 1.99 | 9.53E-19 |
| NEPTUNE | ENSG00000078596 | ITM2A        | 1.99 | 3.61E-18 |
| NEPTUNE | ENSG00000108244 | KRT23        | 1.99 | 1.06E-20 |
| NEPTUNE | ENSG00000166979 | EVA1C        | 1.99 | 6.42E-26 |
| NEPTUNE | ENSG00000161714 | PLCD3        | 1.99 | 9.01E-21 |
| NEPTUNE | ENSG00000134871 | COL4A2       | 1.99 | 2.59E-13 |
| NEPTUNE | ENSG00000102445 | RUBCNL       | 2.00 | 7.85E-22 |
| NEPTUNE | ENSG00000132639 | SNAP25       | 2.00 | 1.48E-18 |
| NEPTUNE | ENSG00000088827 | SIGLEC1      | 2.00 | 1.81E-18 |
| NEPTUNE | ENSG00000060138 | YBX3         | 2.00 | 4.23E-11 |
| NEPTUNE | ENSG00000243649 | CFB          | 2.00 | 6.21E-23 |
| NEPTUNE | ENSG00000277639 | LOC105371267 | 2.00 | 2.87E-15 |
| NEPTUNE | ENSG00000179862 | CITED4       | 2.00 | 6.30E-05 |
| NEPTUNE | ENSG00000135205 | CCDC146      | 2.00 | 3.09E-14 |
| NEPTUNE | ENSG00000205929 | C21orf62     | 2.00 | 1.73E-18 |
| NEPTUNE | ENSG00000117650 | NEK2         | 2.00 | 8.45E-12 |
| NEPTUNE | ENSG00000108960 | MMD          | 2.00 | 2.67E-29 |
| NEPTUNE | ENSG00000111371 | SLC38A1      | 2.00 | 3.00E-20 |
| NEPTUNE | ENSG00000236699 | ARHGEF38     | 2.01 | 5.96E-25 |
| NEPTUNE | ENSG00000154856 | APCDD1       | 2.01 | 9.91E-17 |
| NEPTUNE | ENSG00000106560 | GIMAP2       | 2.01 | 3.26E-25 |
| NEPTUNE | ENSG00000169122 | FAM110B      | 2.01 | 2.53E-27 |
| NEPTUNE | ENSG00000198648 | STK39        | 2.01 | 1.03E-19 |
| NEPTUNE | ENSG00000106333 | PCOLCE       | 2.01 | 8.84E-25 |
| NEPTUNE | ENSG00000198832 | SELENOM      | 2.01 | 1.79E-20 |
| NEPTUNE | ENSG00000144815 | NXPE3        | 2.01 | 3.21E-24 |
| NEPTUNE | ENSG00000180914 | OXTR         | 2.01 | 2.54E-19 |
| NEPTUNE | ENSG00000198467 | TPM2         | 2.01 | 6.68E-14 |
| NEPTUNE | ENSG00000110446 | SLC15A3      | 2.01 | 1.64E-22 |
| NEPTUNE | ENSG00000183690 | EFHC2        | 2.01 | 2.08E-23 |
| NEPTUNE | ENSG00000180448 | ARHGAP45     | 2.01 | 9.78E-23 |
| NEPTUNE | ENSG00000106546 | AHR          | 2.01 | 6.01E-21 |
| NEPTUNE | ENSG00000111252 | SH2B3        | 2.01 | 1.01E-20 |
| NEPTUNE | ENSG00000164877 | MICALL2      | 2.01 | 5.51E-29 |
| NEPTUNE | ENSG00000124942 | AHNAK        | 2.01 | 2.64E-15 |
| NEPTUNE | ENSG00000165046 | LETM2        | 2.01 | 1.44E-25 |
| NEPTUNE | ENSG00000134369 | NAV1         | 2.01 | 1.17E-22 |
| NEPTUNE | ENSG00000163606 | CD200R1      | 2.01 | 3.46E-24 |
| NEPTUNE | ENSG00000176454 | LPCAT4       | 2.02 | 4.44E-35 |
| NEPTUNE | ENSG00000165996 | HACD1        | 2.02 | 7.20E-21 |

|         |                 |           |      |          |
|---------|-----------------|-----------|------|----------|
| NEPTUNE | ENSG00000135925 | WNT10A    | 2.02 | 1.99E-18 |
| NEPTUNE | ENSG00000170382 | LRRN2     | 2.02 | 1.37E-13 |
| NEPTUNE | ENSG00000123342 | MMP19     | 2.02 | 6.94E-29 |
| NEPTUNE | ENSG00000070669 | ASNS      | 2.02 | 4.19E-27 |
| NEPTUNE | ENSG00000154645 | CHODL     | 2.02 | 2.13E-16 |
| NEPTUNE | ENSG00000131188 | PRR7      | 2.02 | 8.07E-29 |
| NEPTUNE | ENSG00000138795 | LEF1      | 2.02 | 4.04E-17 |
| NEPTUNE | ENSG00000100336 | APOL4     | 2.02 | 1.22E-09 |
| NEPTUNE | ENSG00000133800 | LYVE1     | 2.02 | 3.67E-16 |
| NEPTUNE | ENSG00000163923 | RPL39L    | 2.02 | 4.77E-34 |
| NEPTUNE | ENSG00000101224 | CDC25B    | 2.02 | 1.74E-23 |
| NEPTUNE | ENSG00000148426 | PROSER2   | 2.02 | 6.14E-15 |
| NEPTUNE | ENSG00000141510 | TP53      | 2.02 | 7.45E-39 |
| NEPTUNE | ENSG00000137691 | CFAP300   | 2.02 | 2.49E-26 |
| NEPTUNE | ENSG00000064763 | FAR2      | 2.03 | 4.16E-28 |
| NEPTUNE | ENSG00000160111 | CPAMD8    | 2.03 | 6.26E-11 |
| NEPTUNE | ENSG00000178562 | CD28      | 2.03 | 9.92E-23 |
| NEPTUNE | ENSG00000007384 | RHBDF1    | 2.03 | 1.97E-21 |
| NEPTUNE | ENSG00000169896 | ITGAM     | 2.03 | 2.21E-27 |
| NEPTUNE | ENSG00000221955 | SLC12A8   | 2.03 | 4.13E-20 |
| NEPTUNE | ENSG00000160791 | CCR5      | 2.03 | 6.32E-30 |
| NEPTUNE | ENSG00000120129 | DUSP1     | 2.03 | 5.42E-08 |
| NEPTUNE | ENSG00000100379 | KCTD17    | 2.03 | 2.15E-26 |
| NEPTUNE | ENSG00000179750 | APOBEC3B  | 2.03 | 1.47E-15 |
| NEPTUNE | ENSG00000162687 | KCNT2     | 2.03 | 1.87E-28 |
| NEPTUNE | ENSG00000168675 | LDLRAD4   | 2.03 | 1.73E-22 |
| NEPTUNE | ENSG00000119946 | CNNM1     | 2.03 | 4.47E-14 |
| NEPTUNE | ENSG00000092969 | TGFB2     | 2.03 | 1.73E-22 |
| NEPTUNE | ENSG00000235568 | NFAM1     | 2.03 | 8.92E-27 |
| NEPTUNE | ENSG00000223914 | LINC02471 | 2.04 | 3.14E-15 |
| NEPTUNE | ENSG00000122861 | PLAU      | 2.04 | 1.09E-09 |
| NEPTUNE | ENSG00000161249 | DMKN      | 2.04 | 2.56E-25 |
| NEPTUNE | ENSG00000010327 | STAB1     | 2.04 | 2.61E-21 |
| NEPTUNE | ENSG00000072818 | ACAP1     | 2.04 | 3.15E-21 |
| NEPTUNE | ENSG00000105329 | TGFB1     | 2.04 | 4.96E-20 |
| NEPTUNE | ENSG00000126759 | CFP       | 2.04 | 4.71E-29 |
| NEPTUNE | ENSG00000035862 | TIMP2     | 2.04 | 3.07E-14 |
| NEPTUNE | ENSG00000261115 | TMEM178B  | 2.04 | 1.34E-20 |
| NEPTUNE | ENSG00000133985 | TTC9      | 2.04 | 8.19E-20 |
| NEPTUNE | ENSG00000206503 | HLA-A     | 2.04 | 3.40E-24 |
| NEPTUNE | ENSG00000250303 | LINC02762 | 2.04 | 2.08E-27 |
| NEPTUNE | ENSG00000130635 | COL5A1    | 2.05 | 2.37E-21 |
| NEPTUNE | ENSG00000134326 | CMPK2     | 2.05 | 1.71E-13 |
| NEPTUNE | ENSG00000127412 | TRPV5     | 2.05 | 1.15E-15 |
| NEPTUNE | ENSG00000137501 | SYTL2     | 2.05 | 1.41E-31 |
| NEPTUNE | ENSG00000163520 | FBLN2     | 2.05 | 4.30E-09 |
| NEPTUNE | ENSG00000105894 | PTN       | 2.05 | 4.10E-15 |
| NEPTUNE | ENSG00000138685 | FGF2      | 2.05 | 5.50E-25 |
| NEPTUNE | ENSG00000103021 | CCDC113   | 2.05 | 5.67E-28 |
| NEPTUNE | ENSG00000173198 | CYSLTR1   | 2.06 | 1.32E-25 |
| NEPTUNE | ENSG00000106348 | IMPDH1    | 2.06 | 1.67E-30 |
| NEPTUNE | ENSG00000171560 | FGA       | 2.06 | 1.32E-09 |
| NEPTUNE | ENSG00000253368 | TRNP1     | 2.06 | 3.39E-15 |

|         |                 |           |      |          |
|---------|-----------------|-----------|------|----------|
| NEPTUNE | ENSG00000181026 | AEN       | 2.06 | 7.33E-24 |
| NEPTUNE | ENSG00000061337 | LZTS1     | 2.06 | 2.85E-25 |
| NEPTUNE | ENSG00000123095 | BHLHE41   | 2.06 | 1.53E-17 |
| NEPTUNE | ENSG00000100626 | GALNT16   | 2.06 | 3.08E-19 |
| NEPTUNE | ENSG00000114529 | C3orf52   | 2.06 | 7.06E-25 |
| NEPTUNE | ENSG00000164949 | GEM       | 2.06 | 7.43E-28 |
| NEPTUNE | ENSG00000173320 | STOX2     | 2.06 | 9.83E-25 |
| NEPTUNE | ENSG00000121281 | ADCY7     | 2.07 | 6.42E-28 |
| NEPTUNE | ENSG00000137648 | TMPRSS4   | 2.07 | 2.11E-19 |
| NEPTUNE | ENSG00000123485 | HJURP     | 2.07 | 1.25E-15 |
| NEPTUNE | ENSG00000151790 | TDO2      | 2.07 | 5.03E-20 |
| NEPTUNE | ENSG00000120254 | MTHFD1L   | 2.07 | 5.73E-22 |
| NEPTUNE | ENSG00000101017 | CD40      | 2.07 | 1.29E-26 |
| NEPTUNE | ENSG00000204054 | LINC00963 | 2.07 | 3.51E-26 |
| NEPTUNE | ENSG00000189171 | S100A13   | 2.07 | 2.26E-25 |
| NEPTUNE | ENSG00000136826 | KLF4      | 2.07 | 3.33E-30 |
| NEPTUNE | ENSG00000168071 | CCDC88B   | 2.07 | 1.90E-37 |
| NEPTUNE | ENSG00000131831 | RAI2      | 2.07 | 1.09E-24 |
| NEPTUNE | ENSG00000151702 | FLI1      | 2.08 | 4.87E-23 |
| NEPTUNE | ENSG00000183696 | UPP1      | 2.08 | 2.81E-36 |
| NEPTUNE | ENSG00000156011 | PSD3      | 2.08 | 9.17E-21 |
| NEPTUNE | ENSG00000065911 | MTHFD2    | 2.08 | 1.18E-28 |
| NEPTUNE | ENSG00000123096 | SSPN      | 2.08 | 2.07E-26 |
| NEPTUNE | ENSG00000149115 | TNKS1BP1  | 2.08 | 4.49E-21 |
| NEPTUNE | ENSG00000115165 | CYTIP     | 2.08 | 3.55E-21 |
| NEPTUNE | ENSG00000150337 | FCGR1A    | 2.08 | 8.48E-36 |
| NEPTUNE | ENSG00000130558 | OLFM1     | 2.08 | 2.33E-21 |
| NEPTUNE | ENSG00000163874 | ZC3H12A   | 2.08 | 1.36E-33 |
| NEPTUNE | ENSG00000146094 | DOK3      | 2.08 | 7.80E-31 |
| NEPTUNE | ENSG00000185404 | SP140L    | 2.08 | 3.13E-35 |
| NEPTUNE | ENSG00000059377 | TBXAS1    | 2.08 | 5.31E-32 |
| NEPTUNE | ENSG00000112378 | PERP      | 2.08 | 1.32E-26 |
| NEPTUNE | ENSG00000196954 | CASP4     | 2.08 | 9.50E-42 |
| NEPTUNE | ENSG00000145779 | TNFAIP8   | 2.09 | 2.12E-35 |
| NEPTUNE | ENSG00000143537 | ADAM15    | 2.09 | 5.92E-29 |
| NEPTUNE | ENSG00000110651 | CD81      | 2.09 | 4.22E-16 |
| NEPTUNE | ENSG00000182534 | MXRA7     | 2.09 | 7.47E-07 |
| NEPTUNE | ENSG00000134057 | CCNB1     | 2.09 | 1.36E-22 |
| NEPTUNE | ENSG00000100558 | PLEK2     | 2.09 | 7.57E-27 |
| NEPTUNE | ENSG00000128487 | SPECC1    | 2.09 | 1.49E-29 |
| NEPTUNE | ENSG00000176153 | GPX2      | 2.09 | 9.60E-12 |
| NEPTUNE | ENSG00000161642 | ZNF385A   | 2.09 | 2.94E-33 |
| NEPTUNE | ENSG00000114346 | ECT2      | 2.09 | 8.74E-25 |
| NEPTUNE | ENSG00000054793 | ATP9A     | 2.09 | 3.45E-26 |
| NEPTUNE | ENSG00000077150 | NFKB2     | 2.10 | 1.21E-20 |
| NEPTUNE | ENSG00000204291 | COL15A1   | 2.10 | 1.78E-16 |
| NEPTUNE | ENSG00000157368 | IL34      | 2.10 | 1.70E-26 |
| NEPTUNE | ENSG00000120820 | GLT8D2    | 2.10 | 6.33E-23 |
| NEPTUNE | ENSG00000165072 | MAMDC2    | 2.10 | 1.86E-20 |
| NEPTUNE | ENSG00000074370 | ATP2A3    | 2.10 | 1.92E-17 |
| NEPTUNE | ENSG00000134690 | CDCA8     | 2.10 | 2.86E-18 |
| NEPTUNE | ENSG00000172216 | CEBPB     | 2.10 | 8.62E-14 |
| NEPTUNE | ENSG00000189334 | S100A14   | 2.10 | 2.14E-23 |

|         |                 |               |      |          |
|---------|-----------------|---------------|------|----------|
| NEPTUNE | ENSG00000179841 | AKAP5         | 2.10 | 7.87E-21 |
| NEPTUNE | ENSG00000151632 | AKR1C1/AKR1C2 | 2.10 | 2.12E-10 |
| NEPTUNE | ENSG00000131459 | GFPT2         | 2.10 | 7.11E-21 |
| NEPTUNE | ENSG00000204261 | PSMB8-AS1     | 2.10 | 9.94E-33 |
| NEPTUNE | ENSG00000257017 | HP            | 2.10 | 1.91E-14 |
| NEPTUNE | ENSG00000187688 | TRPV2         | 2.10 | 1.34E-27 |
| NEPTUNE | ENSG00000153395 | LPCAT1        | 2.10 | 2.91E-17 |
| NEPTUNE | ENSG00000061273 | HDAC7         | 2.10 | 7.46E-32 |
| NEPTUNE | ENSG00000183484 | GPR132        | 2.10 | 4.56E-30 |
| NEPTUNE | ENSG00000164687 | FABP5         | 2.10 | 2.17E-21 |
| NEPTUNE | ENSG00000143226 | FCGR2A        | 2.10 | 2.80E-24 |
| NEPTUNE | ENSG00000151882 | CCL28         | 2.10 | 4.34E-20 |
| NEPTUNE | ENSG00000118523 | CCN2          | 2.11 | 1.82E-12 |
| NEPTUNE | ENSG00000010030 | ETV7          | 2.11 | 1.50E-24 |
| NEPTUNE | ENSG00000111907 | TPD52L1       | 2.11 | 1.17E-31 |
| NEPTUNE | ENSG00000106123 | EPHB6         | 2.11 | 2.09E-23 |
| NEPTUNE | ENSG00000119699 | TGFB3         | 2.11 | 1.34E-26 |
| NEPTUNE | ENSG00000007174 | DNAH9         | 2.11 | 1.34E-29 |
| NEPTUNE | ENSG00000205413 | SAMD9         | 2.11 | 8.86E-22 |
| NEPTUNE | ENSG00000142686 | C1orf216      | 2.11 | 7.84E-26 |
| NEPTUNE | ENSG00000188761 | BCL2L15       | 2.12 | 1.34E-33 |
| NEPTUNE | ENSG00000137941 | TTLL7         | 2.12 | 1.99E-22 |
| NEPTUNE | ENSG00000164543 | STK17A        | 2.12 | 3.05E-32 |
| NEPTUNE | ENSG00000026103 | FAS           | 2.12 | 1.29E-20 |
| NEPTUNE | ENSG00000137807 | KIF23         | 2.12 | 1.13E-18 |
| NEPTUNE | ENSG00000154277 | UCHL1         | 2.12 | 8.66E-16 |
| NEPTUNE | ENSG00000146070 | PLA2G7        | 2.12 | 2.53E-20 |
| NEPTUNE | ENSG00000145014 | TMEM44        | 2.13 | 1.42E-26 |
| NEPTUNE | ENSG00000128510 | CPA4          | 2.13 | 9.26E-23 |
| NEPTUNE | ENSG00000128422 | KRT17         | 2.13 | 3.18E-17 |
| NEPTUNE | ENSG00000112303 | VNN2          | 2.13 | 2.57E-23 |
| NEPTUNE | ENSG00000172716 | SLFN11        | 2.13 | 9.87E-23 |
| NEPTUNE | ENSG00000164038 | SLC9B2        | 2.13 | 9.69E-29 |
| NEPTUNE | ENSG00000258586 | LINC02274     | 2.13 | 8.03E-10 |
| NEPTUNE | ENSG00000198113 | TOR4A         | 2.13 | 2.91E-20 |
| NEPTUNE | ENSG00000172403 | SYNPO2        | 2.14 | 1.91E-16 |
| NEPTUNE | ENSG00000139514 | SLC7A1        | 2.14 | 2.97E-23 |
| NEPTUNE | ENSG00000183386 | FHL3          | 2.14 | 6.95E-38 |
| NEPTUNE | ENSG00000140678 | ITGAX         | 2.14 | 2.58E-28 |
| NEPTUNE | ENSG00000004838 | ZMYND10       | 2.14 | 1.40E-25 |
| NEPTUNE | ENSG00000132357 | CARD6         | 2.14 | 5.21E-25 |
| NEPTUNE | ENSG00000111696 | NT5DC3        | 2.14 | 2.58E-26 |
| NEPTUNE | ENSG00000131378 | RFTN1         | 2.14 | 1.38E-26 |
| NEPTUNE | ENSG00000254087 | LYN           | 2.14 | 1.66E-18 |
| NEPTUNE | ENSG00000101846 | STS           | 2.14 | 3.90E-22 |
| NEPTUNE | ENSG00000196616 | ADH1B         | 2.15 | 3.96E-12 |
| NEPTUNE | ENSG00000136830 | NIBAN2        | 2.15 | 1.32E-26 |
| NEPTUNE | ENSG00000140682 | TGFB111       | 2.15 | 4.30E-36 |
| NEPTUNE | ENSG00000101871 | MID1          | 2.15 | 1.81E-28 |
| NEPTUNE | ENSG00000130303 | BST2          | 2.15 | 2.67E-18 |
| NEPTUNE | ENSG00000110719 | TCIRG1        | 2.15 | 3.96E-31 |
| NEPTUNE | ENSG00000135048 | CEMIP2        | 2.15 | 2.00E-19 |
| NEPTUNE | ENSG00000082497 | SERTAD4       | 2.15 | 1.62E-23 |

|         |                 |          |      |          |
|---------|-----------------|----------|------|----------|
| NEPTUNE | ENSG00000142102 | PGGHG    | 2.15 | 5.06E-27 |
| NEPTUNE | ENSG00000180198 | RCC1     | 2.15 | 1.35E-32 |
| NEPTUNE | ENSG00000091490 | SEL1L3   | 2.15 | 2.02E-15 |
| NEPTUNE | ENSG00000186469 | GNG2     | 2.15 | 2.59E-27 |
| NEPTUNE | ENSG00000140511 | HAPLN3   | 2.15 | 1.14E-32 |
| NEPTUNE | ENSG00000115232 | ITGA4    | 2.15 | 6.51E-24 |
| NEPTUNE | ENSG00000111145 | ELK3     | 2.15 | 1.31E-28 |
| NEPTUNE | ENSG00000171621 | SPSB1    | 2.16 | 7.72E-12 |
| NEPTUNE | ENSG00000155093 | PTPRN2   | 2.16 | 4.41E-32 |
| NEPTUNE | ENSG00000097046 | CDC7     | 2.16 | 4.32E-25 |
| NEPTUNE | ENSG00000004468 | CD38     | 2.16 | 4.05E-19 |
| NEPTUNE | ENSG00000148053 | NTRK2    | 2.16 | 5.99E-14 |
| NEPTUNE | ENSG00000113070 | HBEGF    | 2.16 | 8.34E-25 |
| NEPTUNE | ENSG00000100526 | CDKN3    | 2.16 | 3.10E-16 |
| NEPTUNE | ENSG00000176788 | BASP1    | 2.16 | 8.15E-20 |
| NEPTUNE | ENSG00000138378 | STAT4    | 2.16 | 5.12E-35 |
| NEPTUNE | ENSG00000198604 | BAZ1A    | 2.16 | 3.21E-33 |
| NEPTUNE | ENSG00000011465 | DCN      | 2.16 | 3.16E-15 |
| NEPTUNE | ENSG00000113758 | DBN1     | 2.16 | 1.26E-27 |
| NEPTUNE | ENSG00000076641 | PAG1     | 2.16 | 3.34E-24 |
| NEPTUNE | ENSG00000197769 | MAP1LC3C | 2.17 | 9.68E-28 |
| NEPTUNE | ENSG00000172156 | CCL11    | 2.17 | 7.04E-19 |
| NEPTUNE | ENSG00000084207 | GSTP1    | 2.17 | 1.19E-30 |
| NEPTUNE | ENSG00000165434 | PGM2L1   | 2.17 | 2.02E-31 |
| NEPTUNE | ENSG00000125869 | LAMP5    | 2.17 | 1.08E-19 |
| NEPTUNE | ENSG00000156587 | UBE2L6   | 2.17 | 5.39E-34 |
| NEPTUNE | ENSG00000154917 | RAB6B    | 2.17 | 4.88E-31 |
| NEPTUNE | ENSG00000136235 | GPNMB    | 2.17 | 8.52E-14 |
| NEPTUNE | ENSG00000069493 | CLEC2D   | 2.17 | 4.71E-26 |
| NEPTUNE | ENSG00000148848 | ADAM12   | 2.17 | 2.61E-30 |
| NEPTUNE | ENSG00000165178 | NCF1C    | 2.17 | 5.17E-31 |
| NEPTUNE | ENSG00000065833 | ME1      | 2.17 | 3.10E-20 |
| NEPTUNE | ENSG00000105383 | CD33     | 2.17 | 1.96E-27 |
| NEPTUNE | ENSG00000188157 | AGRN     | 2.18 | 7.15E-25 |
| NEPTUNE | ENSG00000160326 | SLC2A6   | 2.18 | 1.74E-25 |
| NEPTUNE | ENSG00000196776 | CD47     | 2.18 | 8.19E-36 |
| NEPTUNE | ENSG00000023902 | PLEKHO1  | 2.18 | 1.84E-25 |
| NEPTUNE | ENSG00000137809 | ITGA11   | 2.18 | 7.23E-19 |
| NEPTUNE | ENSG00000136689 | IL1RN    | 2.19 | 1.43E-24 |
| NEPTUNE | ENSG00000102854 | MSLN     | 2.19 | 2.00E-13 |
| NEPTUNE | ENSG00000132329 | RAMP1    | 2.19 | 8.70E-17 |
| NEPTUNE | ENSG00000166922 | SCG5     | 2.19 | 3.63E-25 |
| NEPTUNE | ENSG00000182752 | PAPPA    | 2.19 | 1.03E-18 |
| NEPTUNE | ENSG00000118503 | TNFAIP3  | 2.19 | 1.40E-24 |
| NEPTUNE | ENSG00000205220 | PSMB10   | 2.19 | 3.72E-39 |
| NEPTUNE | ENSG00000154764 | WNT7A    | 2.19 | 4.35E-30 |
| NEPTUNE | ENSG00000101134 | DOK5     | 2.19 | 1.92E-26 |
| NEPTUNE | ENSG00000129538 | RNASE1   | 2.19 | 3.35E-23 |
| NEPTUNE | ENSG00000232629 | HLA-DQB2 | 2.19 | 9.91E-16 |
| NEPTUNE | ENSG00000142173 | COL6A2   | 2.19 | 1.48E-17 |
| NEPTUNE | ENSG00000109472 | CPE      | 2.19 | 1.29E-10 |
| NEPTUNE | ENSG00000271605 | MILR1    | 2.19 | 4.18E-31 |
| NEPTUNE | ENSG00000112655 | PTK7     | 2.19 | 2.06E-21 |

|         |                 |           |      |          |
|---------|-----------------|-----------|------|----------|
| NEPTUNE | ENSG00000080986 | NDC80     | 2.20 | 9.27E-21 |
| NEPTUNE | ENSG00000113140 | SPARC     | 2.20 | 5.51E-22 |
| NEPTUNE | ENSG00000168404 | MLKL      | 2.20 | 3.68E-31 |
| NEPTUNE | ENSG00000092929 | UNC13D    | 2.20 | 1.64E-33 |
| NEPTUNE | ENSG00000038945 | MSR1      | 2.20 | 2.52E-23 |
| NEPTUNE | ENSG00000167535 | CACNB3    | 2.20 | 1.07E-31 |
| NEPTUNE | ENSG00000175899 | A2M       | 2.20 | 8.41E-17 |
| NEPTUNE | ENSG00000119900 | OGFRL1    | 2.20 | 2.56E-21 |
| NEPTUNE | ENSG00000178999 | AURKB     | 2.20 | 1.50E-22 |
| NEPTUNE | ENSG00000180537 | RNF182    | 2.21 | 9.35E-26 |
| NEPTUNE | ENSG00000004776 | HSPB6     | 2.21 | 2.88E-24 |
| NEPTUNE | ENSG00000123416 | TUBA1B    | 2.21 | 2.74E-35 |
| NEPTUNE | ENSG00000158473 | CD1D      | 2.21 | 7.95E-35 |
| NEPTUNE | ENSG00000259134 | LINC00924 | 2.21 | 9.39E-16 |
| NEPTUNE | ENSG00000069974 | RAB27A    | 2.21 | 3.52E-33 |
| NEPTUNE | ENSG00000168824 | NSG1      | 2.21 | 4.21E-06 |
| NEPTUNE | ENSG00000100162 | CENPM     | 2.21 | 1.23E-22 |
| NEPTUNE | ENSG00000150681 | RGS18     | 2.21 | 6.71E-26 |
| NEPTUNE | ENSG00000189057 | FAM111B   | 2.21 | 3.98E-16 |
| NEPTUNE | ENSG00000160190 | SLC37A1   | 2.22 | 7.23E-38 |
| NEPTUNE | ENSG00000179820 | MYADM     | 2.22 | 4.52E-28 |
| NEPTUNE | ENSG00000183486 | MX2       | 2.22 | 3.93E-20 |
| NEPTUNE | ENSG00000183853 | KIRREL1   | 2.22 | 6.78E-22 |
| NEPTUNE | ENSG00000136542 | GALNT5    | 2.22 | 8.34E-28 |
| NEPTUNE | ENSG00000105246 | EBI3      | 2.22 | 9.30E-29 |
| NEPTUNE | ENSG00000137699 | TRIM29    | 2.22 | 8.69E-17 |
| NEPTUNE | ENSG00000136425 | CIB2      | 2.22 | 1.21E-21 |
| NEPTUNE | ENSG00000115523 | GNLY      | 2.23 | 1.67E-19 |
| NEPTUNE | ENSG00000154553 | PDLIM3    | 2.23 | 2.28E-18 |
| NEPTUNE | ENSG00000079689 | SCGN      | 2.23 | 5.53E-22 |
| NEPTUNE | ENSG00000163154 | TNFAIP8L2 | 2.23 | 1.11E-30 |
| NEPTUNE | ENSG00000198771 | RCSD1     | 2.23 | 2.30E-26 |
| NEPTUNE | ENSG00000177469 | CAVIN1    | 2.23 | 2.44E-22 |
| NEPTUNE | ENSG00000185989 | RASA3     | 2.23 | 9.74E-26 |
| NEPTUNE | ENSG00000173535 | TNFRSF10C | 2.23 | 2.44E-28 |
| NEPTUNE | ENSG00000101850 | GPR143    | 2.24 | 9.35E-27 |
| NEPTUNE | ENSG00000011426 | ANLN      | 2.24 | 1.09E-15 |
| NEPTUNE | ENSG00000186867 | QRFPR     | 2.24 | 3.13E-29 |
| NEPTUNE | ENSG00000113263 | ITK       | 2.24 | 6.94E-29 |
| NEPTUNE | ENSG00000085514 | PILRA     | 2.24 | 8.11E-27 |
| NEPTUNE | ENSG00000131042 | LILRB2    | 2.24 | 3.90E-32 |
| NEPTUNE | ENSG00000085831 | TTC39A    | 2.24 | 1.36E-21 |
| NEPTUNE | ENSG00000198901 | PRC1      | 2.24 | 8.28E-21 |
| NEPTUNE | ENSG00000137404 | NRM       | 2.25 | 2.12E-35 |
| NEPTUNE | ENSG00000102034 | ELF4      | 2.25 | 5.09E-31 |
| NEPTUNE | ENSG00000131153 | GIN52     | 2.25 | 2.81E-23 |
| NEPTUNE | ENSG00000112769 | LAMA4     | 2.25 | 2.76E-22 |
| NEPTUNE | ENSG00000140853 | NLRC5     | 2.25 | 3.59E-26 |
| NEPTUNE | ENSG00000126709 | IFI6      | 2.25 | 7.51E-08 |
| NEPTUNE | ENSG00000154639 | CXADR     | 2.25 | 5.95E-29 |
| NEPTUNE | ENSG00000079215 | SLC1A3    | 2.25 | 1.73E-22 |
| NEPTUNE | ENSG00000163762 | TM4SF18   | 2.25 | 3.96E-22 |
| NEPTUNE | ENSG00000179241 | LDLRAD3   | 2.26 | 1.30E-26 |

|         |                 |                   |      |          |
|---------|-----------------|-------------------|------|----------|
| NEPTUNE | ENSG00000134242 | PTPN22            | 2.26 | 1.09E-29 |
| NEPTUNE | ENSG00000048740 | CELF2             | 2.26 | 6.59E-28 |
| NEPTUNE | ENSG00000075618 | FSCN1             | 2.26 | 7.04E-31 |
| NEPTUNE | ENSG00000166750 | SLFN5             | 2.26 | 8.59E-23 |
| NEPTUNE | ENSG00000166289 | PLEKHF1           | 2.27 | 1.11E-30 |
| NEPTUNE | ENSG00000260314 | MRC1              | 2.27 | 9.06E-24 |
| NEPTUNE | ENSG00000243449 | C4orf48           | 2.27 | 1.95E-22 |
| NEPTUNE | ENSG00000162998 | FRZB              | 2.27 | 6.23E-18 |
| NEPTUNE | ENSG00000095303 | PTGS1             | 2.27 | 1.55E-11 |
| NEPTUNE | ENSG00000163909 | HEYL              | 2.27 | 3.06E-22 |
| NEPTUNE | ENSG00000140545 | MFGE8             | 2.27 | 4.68E-23 |
| NEPTUNE | ENSG00000158747 | MICOS10-NBL1/NBL1 | 2.27 | 1.54E-29 |
| NEPTUNE | ENSG00000141682 | PMAIP1            | 2.28 | 5.68E-34 |
| NEPTUNE | ENSG00000162739 | SLAMF6            | 2.28 | 1.93E-27 |
| NEPTUNE | ENSG00000203760 | CENPW             | 2.28 | 2.59E-33 |
| NEPTUNE | ENSG00000111344 | RASAL1            | 2.28 | 2.77E-19 |
| NEPTUNE | ENSG00000090104 | RGS1              | 2.28 | 8.76E-25 |
| NEPTUNE | ENSG00000101236 | RNF24             | 2.28 | 3.01E-27 |
| NEPTUNE | ENSG00000111057 | KRT18             | 2.28 | 2.72E-35 |
| NEPTUNE | ENSG00000149573 | MPZL2             | 2.29 | 1.03E-34 |
| NEPTUNE | ENSG00000172243 | CLEC7A            | 2.29 | 3.06E-33 |
| NEPTUNE | ENSG00000185499 | MUC1              | 2.29 | 3.40E-19 |
| NEPTUNE | ENSG00000100448 | CTSG              | 2.29 | 1.53E-21 |
| NEPTUNE | ENSG00000138172 | CALHM2            | 2.29 | 2.79E-32 |
| NEPTUNE | ENSG00000181885 | CLDN7             | 2.29 | 1.19E-36 |
| NEPTUNE | ENSG00000169252 | ADRB2             | 2.29 | 7.03E-33 |
| NEPTUNE | ENSG00000133216 | EPHB2             | 2.29 | 1.92E-24 |
| NEPTUNE | ENSG00000117724 | CENPF             | 2.29 | 2.87E-18 |
| NEPTUNE | ENSG00000158186 | MRAS              | 2.29 | 8.31E-39 |
| NEPTUNE | ENSG00000162692 | VCAM1             | 2.29 | 7.51E-11 |
| NEPTUNE | ENSG00000165507 | DEPP1             | 2.29 | 6.42E-28 |
| NEPTUNE | ENSG00000171551 | ECEL1             | 2.30 | 4.69E-13 |
| NEPTUNE | ENSG00000163219 | ARHGAP25          | 2.30 | 6.89E-28 |
| NEPTUNE | ENSG00000184489 | PTP4A3            | 2.30 | 2.50E-34 |
| NEPTUNE | ENSG00000111817 | DSE               | 2.30 | 2.56E-29 |
| NEPTUNE | ENSG00000109099 | PMP22             | 2.30 | 1.18E-32 |
| NEPTUNE | ENSG00000110852 | CLEC2B            | 2.30 | 1.13E-27 |
| NEPTUNE | ENSG00000137462 | TLR2              | 2.30 | 2.06E-32 |
| NEPTUNE | ENSG00000142552 | RCN3              | 2.31 | 1.26E-29 |
| NEPTUNE | ENSG00000197471 | SPN               | 2.31 | 1.63E-29 |
| NEPTUNE | ENSG00000134470 | IL15RA            | 2.31 | 9.34E-34 |
| NEPTUNE | ENSG00000170545 | SMAGP             | 2.31 | 1.31E-34 |
| NEPTUNE | ENSG00000138180 | CEP55             | 2.31 | 3.47E-22 |
| NEPTUNE | ENSG00000124249 | KCNK15            | 2.31 | 3.98E-34 |
| NEPTUNE | ENSG00000155254 | MARVELD1          | 2.31 | 3.58E-20 |
| NEPTUNE | ENSG00000154080 | CHST9             | 2.31 | 1.22E-22 |
| NEPTUNE | ENSG00000166147 | FBN1              | 2.31 | 1.15E-20 |
| NEPTUNE | ENSG00000054392 | HHAT              | 2.31 | 2.20E-23 |
| NEPTUNE | ENSG00000104814 | MAP4K1            | 2.31 | 2.82E-33 |
| NEPTUNE | ENSG00000084731 | KIF3C             | 2.32 | 2.35E-39 |
| NEPTUNE | ENSG00000121966 | CXCR4             | 2.32 | 3.82E-21 |
| NEPTUNE | ENSG00000204381 | LAYN              | 2.32 | 8.28E-28 |
| NEPTUNE | ENSG00000157601 | MX1               | 2.32 | 1.81E-15 |



|         |                 |          |      |          |
|---------|-----------------|----------|------|----------|
| NEPTUNE | ENSG00000169679 | BUB1     | 2.32 | 1.91E-17 |
| NEPTUNE | ENSG00000175793 | SFN      | 2.32 | 6.46E-34 |
| NEPTUNE | ENSG00000121361 | KCNJ8    | 2.33 | 1.74E-26 |
| NEPTUNE | ENSG00000186470 | BTN3A2   | 2.33 | 4.09E-32 |
| NEPTUNE | ENSG00000137965 | IFI44    | 2.33 | 2.09E-19 |
| NEPTUNE | ENSG00000172116 | CD8B     | 2.33 | 8.64E-28 |
| NEPTUNE | ENSG00000113361 | CDH6     | 2.33 | 3.24E-18 |
| NEPTUNE | ENSG00000100644 | HIF1A    | 2.33 | 6.78E-32 |
| NEPTUNE | ENSG00000277586 | NEFL     | 2.33 | 4.25E-11 |
| NEPTUNE | ENSG00000156265 | MAP3K7CL | 2.33 | 6.43E-25 |
| NEPTUNE | ENSG00000154760 | SLFN13   | 2.34 | 7.83E-20 |
| NEPTUNE | ENSG00000117602 | RCAN3    | 2.34 | 3.88E-34 |
| NEPTUNE | ENSG00000185507 | IRF7     | 2.34 | 2.03E-24 |
| NEPTUNE | ENSG00000181631 | P2RY13   | 2.34 | 2.76E-28 |
| NEPTUNE | ENSG00000105643 | ARRDC2   | 2.34 | 1.29E-23 |
| NEPTUNE | ENSG00000100985 | MMP9     | 2.35 | 1.07E-19 |
| NEPTUNE | ENSG00000213190 | MLLT11   | 2.35 | 1.50E-36 |
| NEPTUNE | ENSG00000169903 | TM4SF4   | 2.35 | 1.12E-23 |
| NEPTUNE | ENSG00000005844 | ITGAL    | 2.35 | 2.16E-26 |
| NEPTUNE | ENSG00000134802 | SLC43A3  | 2.35 | 1.00E-35 |
| NEPTUNE | ENSG00000126787 | DLGAP5   | 2.35 | 2.79E-22 |
| NEPTUNE | ENSG00000068366 | ACSL4    | 2.35 | 1.44E-25 |
| NEPTUNE | ENSG00000115339 | GALNT3   | 2.35 | 5.49E-31 |
| NEPTUNE | ENSG00000118785 | SPP1     | 2.36 | 8.66E-17 |
| NEPTUNE | ENSG00000169908 | TM4SF1   | 2.36 | 4.62E-27 |
| NEPTUNE | ENSG00000082014 | SMARCD3  | 2.36 | 2.69E-31 |
| NEPTUNE | ENSG00000059804 | SLC2A3   | 2.36 | 2.27E-26 |
| NEPTUNE | ENSG00000124225 | PMEPA1   | 2.36 | 1.01E-24 |
| NEPTUNE | ENSG00000112984 | KIF20A   | 2.36 | 6.66E-16 |
| NEPTUNE | ENSG00000107796 | ACTA2    | 2.36 | 4.04E-17 |
| NEPTUNE | ENSG00000104972 | LILRB1   | 2.36 | 4.48E-32 |
| NEPTUNE | ENSG00000165304 | MELK     | 2.37 | 1.00E-19 |
| NEPTUNE | ENSG00000064547 | LPAR2    | 2.37 | 2.72E-33 |
| NEPTUNE | ENSG00000183943 | PRKX     | 2.37 | 5.74E-28 |
| NEPTUNE | ENSG00000104723 | TUSC3    | 2.37 | 5.83E-31 |
| NEPTUNE | ENSG00000141506 | PIK3R5   | 2.37 | 6.49E-29 |
| NEPTUNE | ENSG00000198821 | CD247    | 2.37 | 4.46E-28 |
| NEPTUNE | ENSG00000139629 | GALNT6   | 2.37 | 4.24E-27 |
| NEPTUNE | ENSG00000158258 | CLSTN2   | 2.37 | 1.60E-10 |
| NEPTUNE | ENSG00000161405 | IKZF3    | 2.37 | 1.75E-25 |
| NEPTUNE | ENSG00000101255 | TRIB3    | 2.37 | 2.23E-28 |
| NEPTUNE | ENSG00000180644 | PRF1     | 2.37 | 2.64E-24 |
| NEPTUNE | ENSG00000132031 | MATN3    | 2.37 | 1.69E-28 |
| NEPTUNE | ENSG00000187653 | TMSB4XP8 | 2.37 | 9.92E-33 |
| NEPTUNE | ENSG00000007933 | FMO3     | 2.37 | 8.89E-17 |
| NEPTUNE | ENSG00000170955 | CAVIN3   | 2.38 | 2.07E-28 |
| NEPTUNE | ENSG00000163106 | HPGDS    | 2.38 | 4.27E-31 |
| NEPTUNE | ENSG00000137331 | IER3     | 2.38 | 6.98E-35 |
| NEPTUNE | ENSG00000111335 | OAS2     | 2.38 | 5.80E-17 |
| NEPTUNE | ENSG00000186810 | CXCR3    | 2.39 | 2.02E-27 |
| NEPTUNE | ENSG00000146232 | NFKBIE   | 2.39 | 8.94E-33 |
| NEPTUNE | ENSG00000085662 | AKR1B1   | 2.39 | 6.98E-24 |
| NEPTUNE | ENSG00000049449 | RCN1     | 2.39 | 1.32E-31 |

|                |                        |            |             |                 |
|----------------|------------------------|------------|-------------|-----------------|
| NEPTUNE        | ENSG00000145685        | LHFPL2     | 2.40        | 1.21E-28        |
| NEPTUNE        | ENSG00000154978        | VOPP1      | 2.40        | 8.46E-27        |
| NEPTUNE        | ENSG00000188015        | S100A3     | 2.40        | 3.13E-29        |
| NEPTUNE        | ENSG00000107438        | PDLIM1     | 2.40        | 9.06E-36        |
| NEPTUNE        | ENSG00000149591        | TAGLN      | 2.40        | 3.10E-20        |
| NEPTUNE        | ENSG00000131080        | EDA2R      | 2.40        | 5.14E-25        |
| NEPTUNE        | ENSG00000125910        | S1PR4      | 2.40        | 2.39E-30        |
| NEPTUNE        | ENSG00000143546        | S100A8     | 2.40        | 1.18E-13        |
| NEPTUNE        | ENSG00000134955        | SLC37A2    | 2.40        | 6.65E-23        |
| NEPTUNE        | ENSG00000187955        | COL14A1    | 2.41        | 1.03E-15        |
| NEPTUNE        | ENSG00000166278        | C2         | 2.41        | 5.56E-13        |
| NEPTUNE        | ENSG00000187498        | COL4A1     | 2.41        | 2.96E-26        |
| <b>NEPTUNE</b> | <b>ENSG00000232810</b> | <b>TNF</b> | <b>2.41</b> | <b>1.68E-37</b> |
| NEPTUNE        | ENSG00000127954        | STEAP4     | 2.41        | 3.58E-23        |
| NEPTUNE        | ENSG00000158517        | NCF1       | 2.41        | 1.21E-29        |
| NEPTUNE        | ENSG00000129048        | ACKR4      | 2.41        | 8.59E-31        |
| NEPTUNE        | ENSG00000105974        | CAV1       | 2.41        | 2.07E-28        |
| NEPTUNE        | ENSG00000148908        | RGS10      | 2.41        | 7.04E-31        |
| NEPTUNE        | ENSG00000188783        | PRELP      | 2.41        | 5.31E-17        |
| NEPTUNE        | ENSG00000162734        | PEA15      | 2.41        | 2.02E-40        |
| NEPTUNE        | ENSG00000126458        | RRAS       | 2.42        | 1.19E-33        |
| NEPTUNE        | ENSG00000196664        | TLR7       | 2.42        | 1.29E-30        |
| NEPTUNE        | ENSG00000162772        | ATF3       | 2.42        | 9.27E-26        |
| NEPTUNE        | ENSG00000067057        | PFKP       | 2.42        | 6.68E-26        |
| NEPTUNE        | ENSG00000198133        | TMEM229B   | 2.42        | 2.04E-31        |
| NEPTUNE        | ENSG00000104332        | SFRP1      | 2.42        | 6.00E-20        |
| NEPTUNE        | ENSG00000241839        | PLEKHO2    | 2.42        | 2.69E-30        |
| NEPTUNE        | ENSG00000175489        | LRRC25     | 2.43        | 1.16E-32        |
| NEPTUNE        | ENSG00000117399        | CDC20      | 2.43        | 2.06E-16        |
| NEPTUNE        | ENSG00000198121        | LPAR1      | 2.43        | 2.61E-28        |
| NEPTUNE        | ENSG00000158714        | SLAMF8     | 2.44        | 1.43E-27        |
| NEPTUNE        | ENSG00000131435        | PDLIM4     | 2.44        | 1.81E-31        |
| NEPTUNE        | ENSG00000145386        | CCNA2      | 2.44        | 1.24E-15        |
| NEPTUNE        | ENSG00000077238        | IL4R       | 2.44        | 4.99E-31        |
| NEPTUNE        | ENSG00000188820        | CALHM6     | 2.44        | 2.90E-35        |
| NEPTUNE        | ENSG00000146038        | DCDC2      | 2.44        | 1.66E-34        |
| NEPTUNE        | ENSG00000048052        | HDAC9      | 2.45        | 3.06E-29        |
| NEPTUNE        | ENSG00000184254        | ALDH1A3    | 2.45        | 1.21E-28        |
| NEPTUNE        | ENSG00000075426        | FOSL2      | 2.45        | 3.09E-31        |
| NEPTUNE        | ENSG00000206337        | HCP5       | 2.45        | 5.74E-28        |
| NEPTUNE        | ENSG00000204264        | PSMB8      | 2.45        | 9.16E-40        |
| NEPTUNE        | ENSG00000155307        | SAMSN1     | 2.45        | 2.32E-18        |
| NEPTUNE        | ENSG00000167895        | TMC8       | 2.45        | 4.73E-33        |
| NEPTUNE        | ENSG00000159212        | CLIC6      | 2.45        | 2.19E-29        |
| NEPTUNE        | ENSG00000010671        | BTK        | 2.45        | 1.50E-32        |
| NEPTUNE        | ENSG00000175592        | FOSL1      | 2.45        | 1.94E-26        |
| NEPTUNE        | ENSG00000140297        | GCNT3      | 2.45        | 4.74E-14        |
| NEPTUNE        | ENSG00000099337        | KCNK6      | 2.45        | 2.41E-39        |
| NEPTUNE        | ENSG00000176971        | FIBIN      | 2.45        | 8.65E-24        |
| NEPTUNE        | ENSG00000168461        | RAB31      | 2.45        | 1.41E-40        |
| NEPTUNE        | ENSG00000081041        | CXCL2      | 2.45        | 3.47E-25        |
| NEPTUNE        | ENSG00000154127        | UBASH3B    | 2.45        | 3.04E-29        |
| NEPTUNE        | ENSG00000087245        | MMP2       | 2.45        | 4.13E-23        |

|         |                 |         |      |          |
|---------|-----------------|---------|------|----------|
| NEPTUNE | ENSG00000166851 | PLK1    | 2.46 | 1.86E-20 |
| NEPTUNE | ENSG00000007312 | CD79B   | 2.46 | 2.73E-25 |
| NEPTUNE | ENSG00000198286 | CARD11  | 2.46 | 2.90E-42 |
| NEPTUNE | ENSG00000275385 | CCL18   | 2.46 | 7.25E-11 |
| NEPTUNE | ENSG00000129680 | MAP7D3  | 2.46 | 5.15E-39 |
| NEPTUNE | ENSG00000135114 | OASL    | 2.46 | 6.92E-21 |
| NEPTUNE | ENSG00000197872 | CYRIA   | 2.46 | 1.35E-31 |
| NEPTUNE | ENSG00000130755 | GMFG    | 2.47 | 2.21E-29 |
| NEPTUNE | ENSG00000102962 | CCL22   | 2.47 | 1.83E-21 |
| NEPTUNE | ENSG00000100060 | MFNG    | 2.47 | 1.47E-32 |
| NEPTUNE | ENSG00000066336 | SPI1    | 2.47 | 4.35E-34 |
| NEPTUNE | ENSG00000139178 | C1RL    | 2.47 | 2.49E-40 |
| NEPTUNE | ENSG00000105855 | ITGB8   | 2.47 | 4.32E-25 |
| NEPTUNE | ENSG00000204397 | CARD16  | 2.47 | 2.66E-29 |
| NEPTUNE | ENSG00000006128 | TAC1    | 2.47 | 2.59E-13 |
| NEPTUNE | ENSG00000100365 | NCF4    | 2.48 | 1.08E-32 |
| NEPTUNE | ENSG00000134061 | CD180   | 2.48 | 1.05E-33 |
| NEPTUNE | ENSG00000069399 | BCL3    | 2.48 | 1.21E-14 |
| NEPTUNE | ENSG00000143851 | PTPN7   | 2.48 | 1.86E-21 |
| NEPTUNE | ENSG00000171345 | KRT19   | 2.48 | 3.39E-24 |
| NEPTUNE | ENSG00000182809 | CRIP2   | 2.48 | 2.50E-34 |
| NEPTUNE | ENSG00000046653 | GPM6B   | 2.48 | 8.90E-24 |
| NEPTUNE | ENSG00000111331 | OAS3    | 2.48 | 2.07E-16 |
| NEPTUNE | ENSG00000197142 | ACSL5   | 2.49 | 1.30E-31 |
| NEPTUNE | ENSG00000115414 | FN1     | 2.49 | 5.49E-18 |
| NEPTUNE | ENSG00000105559 | PLEKHA4 | 2.49 | 4.02E-34 |
| NEPTUNE | ENSG00000013810 | TACC3   | 2.49 | 3.10E-33 |
| NEPTUNE | ENSG00000168961 | LGALS9  | 2.49 | 1.89E-37 |
| NEPTUNE | ENSG00000168394 | TAP1    | 2.49 | 7.27E-28 |
| NEPTUNE | ENSG00000175567 | UCP2    | 2.49 | 3.97E-21 |
| NEPTUNE | ENSG00000154451 | GBP5    | 2.50 | 1.34E-26 |
| NEPTUNE | ENSG00000113532 | ST8SIA4 | 2.50 | 7.73E-33 |
| NEPTUNE | ENSG00000024422 | EHD2    | 2.50 | 4.91E-23 |
| NEPTUNE | ENSG00000147113 | DIPK2B  | 2.50 | 2.44E-26 |
| NEPTUNE | ENSG00000173918 | C1QTNF1 | 2.50 | 3.51E-35 |
| NEPTUNE | ENSG00000167695 | TLCD3A  | 2.50 | 5.40E-35 |
| NEPTUNE | ENSG00000197747 | S100A10 | 2.51 | 2.35E-38 |
| NEPTUNE | ENSG00000198075 | SULT1C4 | 2.51 | 4.95E-28 |
| NEPTUNE | ENSG00000174175 | SELP    | 2.51 | 1.79E-21 |
| NEPTUNE | ENSG00000133063 | CHIT1   | 2.51 | 2.71E-08 |
| NEPTUNE | ENSG00000137309 | HMGA1   | 2.52 | 1.39E-31 |
| NEPTUNE | ENSG00000166710 | B2M     | 2.52 | 1.19E-36 |
| NEPTUNE | ENSG00000119535 | CSF3R   | 2.52 | 7.97E-24 |
| NEPTUNE | ENSG00000168078 | PBK     | 2.52 | 8.66E-15 |
| NEPTUNE | ENSG00000133816 | MICAL2  | 2.52 | 9.56E-27 |
| NEPTUNE | ENSG00000115415 | STAT1   | 2.52 | 1.50E-25 |
| NEPTUNE | ENSG00000159216 | RUNX1   | 2.52 | 5.76E-36 |
| NEPTUNE | ENSG00000013588 | GPRC5A  | 2.53 | 5.03E-21 |
| NEPTUNE | ENSG00000163485 | ADORA1  | 2.53 | 3.07E-18 |
| NEPTUNE | ENSG00000182022 | CHST15  | 2.53 | 1.03E-27 |
| NEPTUNE | ENSG00000148344 | PTGES   | 2.53 | 7.88E-24 |
| NEPTUNE | ENSG00000231991 | ANXA2P2 | 2.53 | 1.03E-42 |
| NEPTUNE | ENSG00000123329 | ARHGAP9 | 2.53 | 1.11E-40 |

|         |                 |            |      |          |
|---------|-----------------|------------|------|----------|
| NEPTUNE | ENSG00000277443 | MARCKS     | 2.53 | 1.19E-23 |
| NEPTUNE | ENSG00000188313 | PLSCR1     | 2.53 | 6.13E-39 |
| NEPTUNE | ENSG00000154237 | LRRK1      | 2.53 | 9.57E-34 |
| NEPTUNE | ENSG00000130513 | GDF15      | 2.53 | 2.81E-19 |
| NEPTUNE | ENSG00000105971 | CAV2       | 2.54 | 1.57E-31 |
| NEPTUNE | ENSG00000134258 | VTCN1      | 2.54 | 4.61E-21 |
| NEPTUNE | ENSG00000135916 | ITM2C      | 2.54 | 3.88E-34 |
| NEPTUNE | ENSG00000140030 | GPR65      | 2.54 | 4.10E-34 |
| NEPTUNE | ENSG00000160654 | CD3G       | 2.55 | 6.40E-29 |
| NEPTUNE | ENSG00000067082 | KLF6       | 2.56 | 2.35E-31 |
| NEPTUNE | ENSG00000129038 | LOXL1      | 2.56 | 4.50E-28 |
| NEPTUNE | ENSG00000136286 | MYO1G      | 2.56 | 1.70E-36 |
| NEPTUNE | ENSG00000135269 | TES        | 2.56 | 9.70E-40 |
| NEPTUNE | ENSG00000272398 | CD24       | 2.56 | 2.40E-35 |
| NEPTUNE | ENSG00000171557 | FGG        | 2.56 | 9.26E-12 |
| NEPTUNE | ENSG00000116183 | PAPPA2     | 2.56 | 1.07E-13 |
| NEPTUNE | ENSG00000136514 | RTP4       | 2.56 | 2.38E-33 |
| NEPTUNE | ENSG00000177606 | JUN        | 2.57 | 3.07E-24 |
| NEPTUNE | ENSG00000189159 | JPT1       | 2.57 | 1.05E-41 |
| NEPTUNE | ENSG00000131401 | NAPSB      | 2.57 | 6.47E-12 |
| NEPTUNE | ENSG00000196839 | ADA        | 2.57 | 1.69E-40 |
| NEPTUNE | ENSG00000088325 | TPX2       | 2.57 | 1.44E-17 |
| NEPTUNE | ENSG00000138755 | CXCL9      | 2.57 | 7.57E-19 |
| NEPTUNE | ENSG00000167851 | CD300A     | 2.58 | 8.11E-35 |
| NEPTUNE | ENSG00000174939 | ASPHD1     | 2.58 | 1.19E-36 |
| NEPTUNE | ENSG00000102359 | SRPX2      | 2.58 | 4.42E-35 |
| NEPTUNE | ENSG00000148773 | MKI67      | 2.58 | 4.83E-21 |
| NEPTUNE | ENSG00000084636 | COL16A1    | 2.58 | 3.29E-33 |
| NEPTUNE | ENSG00000170571 | EMB        | 2.59 | 4.32E-27 |
| NEPTUNE | ENSG00000184584 | STING1     | 2.59 | 8.04E-39 |
| NEPTUNE | ENSG00000122176 | FMOD       | 2.59 | 5.74E-24 |
| NEPTUNE | ENSG00000247774 | PCED1B-AS1 | 2.59 | 1.79E-31 |
| NEPTUNE | ENSG00000125657 | TNFSF9     | 2.59 | 2.70E-37 |
| NEPTUNE | ENSG00000110448 | CD5        | 2.60 | 9.41E-35 |
| NEPTUNE | ENSG00000132205 | EMILIN2    | 2.60 | 8.27E-33 |
| NEPTUNE | ENSG00000110799 | VWF        | 2.61 | 4.58E-20 |
| NEPTUNE | ENSG00000172543 | CTSW       | 2.61 | 1.67E-26 |
| NEPTUNE | ENSG00000163359 | COL6A3     | 2.62 | 4.92E-23 |
| NEPTUNE | ENSG00000137265 | IRF4       | 2.62 | 1.45E-35 |
| NEPTUNE | ENSG00000165215 | CLDN3      | 2.62 | 2.66E-28 |
| NEPTUNE | ENSG00000168421 | RHOH       | 2.62 | 4.43E-31 |
| NEPTUNE | ENSG00000240694 | PNMA2      | 2.62 | 1.06E-19 |
| NEPTUNE | ENSG00000165949 | IFI27      | 2.62 | 8.67E-18 |
| NEPTUNE | ENSG00000134531 | EMP1       | 2.62 | 2.12E-28 |
| NEPTUNE | ENSG00000171051 | FPR1       | 2.62 | 4.52E-29 |
| NEPTUNE | ENSG00000029153 | ARNTL2     | 2.63 | 1.41E-40 |
| NEPTUNE | ENSG00000165152 | PGAP4      | 2.63 | 8.63E-35 |
| NEPTUNE | ENSG00000151651 | ADAM8      | 2.63 | 2.58E-30 |
| NEPTUNE | ENSG00000116741 | RGS2       | 2.63 | 1.04E-31 |
| NEPTUNE | ENSG00000171223 | JUNB       | 2.63 | 5.29E-28 |
| NEPTUNE | ENSG00000251292 | ERVH-1     | 2.63 | 2.08E-29 |
| NEPTUNE | ENSG00000172215 | CXCR6      | 2.63 | 1.92E-27 |
| NEPTUNE | ENSG00000174307 | PHLDA3     | 2.63 | 1.88E-26 |

|         |                 |           |      |          |
|---------|-----------------|-----------|------|----------|
| NEPTUNE | ENSG00000104856 | RELB      | 2.64 | 1.07E-29 |
| NEPTUNE | ENSG00000151892 | GFRA1     | 2.64 | 1.11E-23 |
| NEPTUNE | ENSG00000164691 | TAGAP     | 2.64 | 6.61E-32 |
| NEPTUNE | ENSG00000050344 | NFE2L3    | 2.64 | 9.58E-31 |
| NEPTUNE | ENSG00000204257 | HLA-DMA   | 2.64 | 1.38E-36 |
| NEPTUNE | ENSG00000232533 | AC0936735 | 2.65 | 1.50E-40 |
| NEPTUNE | ENSG00000111674 | ENO2      | 2.65 | 3.47E-31 |
| NEPTUNE | ENSG00000007908 | SELE      | 2.65 | 6.06E-23 |
| NEPTUNE | ENSG00000101265 | RASSF2    | 2.65 | 4.71E-28 |
| NEPTUNE | ENSG00000164308 | ERAP2     | 2.66 | 1.21E-07 |
| NEPTUNE | ENSG00000162981 | LRATD1    | 2.66 | 8.96E-29 |
| NEPTUNE | ENSG00000159110 | IFNAR2    | 2.67 | 9.58E-42 |
| NEPTUNE | ENSG00000173467 | AGR3      | 2.67 | 7.07E-36 |
| NEPTUNE | ENSG00000136732 | GYPC      | 2.67 | 3.41E-38 |
| NEPTUNE | ENSG00000171848 | RRM2      | 2.67 | 1.78E-14 |
| NEPTUNE | ENSG00000162512 | SDC3      | 2.68 | 8.92E-31 |
| NEPTUNE | ENSG00000023892 | DEF6      | 2.68 | 7.99E-36 |
| NEPTUNE | ENSG00000128342 | LIF       | 2.68 | 2.39E-34 |
| NEPTUNE | ENSG00000138964 | PARVG     | 2.68 | 2.88E-37 |
| NEPTUNE | ENSG00000168329 | CX3CR1    | 2.68 | 3.99E-27 |
| NEPTUNE | ENSG00000125347 | IRF1      | 2.68 | 3.54E-43 |
| NEPTUNE | ENSG00000169604 | ANTXR1    | 2.68 | 1.46E-30 |
| NEPTUNE | ENSG00000204642 | HLA-F     | 2.68 | 5.49E-32 |
| NEPTUNE | ENSG00000077942 | FBLN1     | 2.68 | 4.12E-17 |
| NEPTUNE | ENSG00000196154 | S100A4    | 2.69 | 3.93E-21 |
| NEPTUNE | ENSG00000276043 | UHRF1     | 2.69 | 2.25E-22 |
| NEPTUNE | ENSG00000170312 | CDK1      | 2.69 | 3.45E-23 |
| NEPTUNE | ENSG00000183722 | LHFPL6    | 2.69 | 1.03E-34 |
| NEPTUNE | ENSG00000137959 | IFI44L    | 2.69 | 5.08E-14 |
| NEPTUNE | ENSG00000197956 | S100A6    | 2.69 | 1.85E-32 |
| NEPTUNE | ENSG00000105374 | NKG7      | 2.69 | 1.90E-27 |
| NEPTUNE | ENSG00000184292 | TACSTD2   | 2.69 | 1.37E-23 |
| NEPTUNE | ENSG00000142347 | MYO1F     | 2.70 | 3.77E-32 |
| NEPTUNE | ENSG00000000971 | CFH       | 2.70 | 1.70E-23 |
| NEPTUNE | ENSG00000106537 | TSPAN13   | 2.70 | 2.19E-37 |
| NEPTUNE | ENSG00000062038 | CDH3      | 2.71 | 3.45E-21 |
| NEPTUNE | ENSG00000161638 | ITGA5     | 2.71 | 1.85E-28 |
| NEPTUNE | ENSG00000078081 | LAMP3     | 2.71 | 1.41E-29 |
| NEPTUNE | ENSG00000234745 | HLA-B     | 2.71 | 1.44E-29 |
| NEPTUNE | ENSG00000102837 | OLFM4     | 2.72 | 1.31E-09 |
| NEPTUNE | ENSG00000137496 | IL18BP    | 2.72 | 6.72E-37 |
| NEPTUNE | ENSG00000129009 | ISLR      | 2.72 | 9.90E-26 |
| NEPTUNE | ENSG00000132334 | PTPRE     | 2.72 | 5.81E-43 |
| NEPTUNE | ENSG00000013725 | CD6       | 2.73 | 7.20E-38 |
| NEPTUNE | ENSG00000167772 | ANGPTL4   | 2.73 | 1.07E-09 |
| NEPTUNE | ENSG00000142627 | EPHA2     | 2.73 | 5.74E-34 |
| NEPTUNE | ENSG00000167077 | MEI1      | 2.73 | 8.04E-33 |
| NEPTUNE | ENSG00000149131 | SERPING1  | 2.73 | 1.63E-32 |
| NEPTUNE | ENSG00000104894 | CD37      | 2.73 | 3.37E-34 |
| NEPTUNE | ENSG00000135842 | NIBAN1    | 2.73 | 1.78E-31 |
| NEPTUNE | ENSG00000157456 | CCNB2     | 2.73 | 8.59E-23 |
| NEPTUNE | ENSG00000123146 | ADGRE5    | 2.74 | 5.95E-31 |
| NEPTUNE | ENSG00000140416 | TPM1      | 2.74 | 5.31E-44 |

|         |                 |           |      |          |
|---------|-----------------|-----------|------|----------|
| NEPTUNE | ENSG00000162745 | OLFML2B   | 2.74 | 8.89E-30 |
| NEPTUNE | ENSG00000171700 | RGS19     | 2.74 | 7.18E-46 |
| NEPTUNE | ENSG00000168487 | BMP1      | 2.74 | 8.57E-31 |
| NEPTUNE | ENSG00000129667 | RHBDF2    | 2.75 | 7.21E-37 |
| NEPTUNE | ENSG00000107281 | NPDC1     | 2.75 | 2.18E-40 |
| NEPTUNE | ENSG00000050165 | DKK3      | 2.75 | 6.01E-30 |
| NEPTUNE | ENSG00000204136 | GGTA1     | 2.75 | 5.13E-30 |
| NEPTUNE | ENSG00000244414 | CFHR1     | 2.75 | 3.22E-14 |
| NEPTUNE | ENSG00000185774 | KCNIP4    | 2.75 | 3.68E-26 |
| NEPTUNE | ENSG00000138061 | CYP1B1    | 2.75 | 2.92E-27 |
| NEPTUNE | ENSG00000122641 | INHBA     | 2.75 | 3.09E-38 |
| NEPTUNE | ENSG00000008517 | IL32      | 2.75 | 9.94E-16 |
| NEPTUNE | ENSG00000183742 | MACC1     | 2.76 | 2.95E-29 |
| NEPTUNE | ENSG00000196781 | TLE1      | 2.76 | 1.32E-29 |
| NEPTUNE | ENSG00000166501 | PRKCB     | 2.76 | 4.23E-29 |
| NEPTUNE | ENSG00000162896 | PIGR      | 2.76 | 1.43E-16 |
| NEPTUNE | ENSG00000197766 | CFD       | 2.76 | 2.68E-21 |
| NEPTUNE | ENSG00000175832 | ETV4      | 2.77 | 9.01E-28 |
| NEPTUNE | ENSG00000182492 | BGN       | 2.77 | 2.58E-27 |
| NEPTUNE | ENSG00000103490 | PYCARD    | 2.77 | 7.83E-42 |
| NEPTUNE | ENSG00000110934 | BIN2      | 2.77 | 7.03E-33 |
| NEPTUNE | ENSG00000196639 | HRH1      | 2.77 | 4.56E-35 |
| NEPTUNE | ENSG00000105011 | ASF1B     | 2.77 | 3.38E-21 |
| NEPTUNE | ENSG00000163430 | FSTL1     | 2.77 | 6.61E-31 |
| NEPTUNE | ENSG00000101670 | LIPG      | 2.78 | 9.51E-25 |
| NEPTUNE | ENSG00000019582 | CD74      | 2.78 | 2.39E-34 |
| NEPTUNE | ENSG00000119632 | IFI27L2   | 2.78 | 9.00E-27 |
| NEPTUNE | ENSG00000170345 | FOS       | 2.78 | 3.30E-12 |
| NEPTUNE | ENSG00000116701 | NCF2      | 2.78 | 1.09E-33 |
| NEPTUNE | ENSG00000081320 | STK17B    | 2.78 | 1.43E-40 |
| NEPTUNE | ENSG00000104998 | IL27RA    | 2.79 | 4.90E-35 |
| NEPTUNE | ENSG00000147251 | DOCK11    | 2.79 | 3.63E-32 |
| NEPTUNE | ENSG00000176463 | SLCO3A1   | 2.79 | 4.23E-27 |
| NEPTUNE | ENSG00000275302 | CCL4      | 2.80 | 1.64E-31 |
| NEPTUNE | ENSG00000117152 | RGS4      | 2.80 | 1.14E-32 |
| NEPTUNE | ENSG00000053747 | LAMA3     | 2.80 | 5.11E-32 |
| NEPTUNE | ENSG00000187474 | FPR3      | 2.80 | 6.93E-33 |
| NEPTUNE | ENSG00000117122 | MFAP2     | 2.80 | 1.56E-33 |
| NEPTUNE | ENSG00000100342 | APOL1     | 2.80 | 3.06E-33 |
| NEPTUNE | ENSG00000141524 | TMC6      | 2.81 | 1.11E-34 |
| NEPTUNE | ENSG00000187608 | ISG15     | 2.81 | 6.52E-16 |
| NEPTUNE | ENSG00000137078 | SIT1      | 2.81 | 7.68E-32 |
| NEPTUNE | ENSG00000163814 | CDCP1     | 2.81 | 1.16E-32 |
| NEPTUNE | ENSG00000110848 | CD69      | 2.82 | 2.79E-33 |
| NEPTUNE | ENSG00000233901 | LINC01503 | 2.82 | 6.79E-29 |
| NEPTUNE | ENSG00000175857 | GAPT      | 2.82 | 7.54E-31 |
| NEPTUNE | ENSG00000153283 | CD96      | 2.82 | 5.81E-29 |
| NEPTUNE | ENSG00000100385 | IL2RB     | 2.83 | 6.54E-30 |
| NEPTUNE | ENSG00000000938 | FGR       | 2.83 | 3.88E-33 |
| NEPTUNE | ENSG00000235531 | MSC-AS1   | 2.83 | 1.89E-33 |
| NEPTUNE | ENSG00000128245 | YWHAH     | 2.83 | 5.96E-28 |
| NEPTUNE | ENSG00000170006 | TMEM154   | 2.84 | 8.45E-37 |
| NEPTUNE | ENSG00000132718 | SYT11     | 2.84 | 1.69E-32 |

|         |                 |          |      |          |
|---------|-----------------|----------|------|----------|
| NEPTUNE | ENSG00000167460 | TPM4     | 2.84 | 7.34E-41 |
| NEPTUNE | ENSG00000185022 | MAFF     | 2.84 | 4.55E-31 |
| NEPTUNE | ENSG00000184371 | CSF1     | 2.85 | 1.40E-36 |
| NEPTUNE | ENSG00000101057 | MYBL2    | 2.86 | 8.40E-28 |
| NEPTUNE | ENSG00000078401 | EDN1     | 2.86 | 3.98E-34 |
| NEPTUNE | ENSG00000196684 | HSH2D    | 2.86 | 7.11E-39 |
| NEPTUNE | ENSG00000186818 | LILRB4   | 2.86 | 3.18E-33 |
| NEPTUNE | ENSG00000146112 | PPP1R18  | 2.87 | 2.71E-41 |
| NEPTUNE | ENSG00000154734 | ADAMTS1  | 2.87 | 5.92E-21 |
| NEPTUNE | ENSG00000028137 | TNFRSF1B | 2.87 | 4.93E-30 |
| NEPTUNE | ENSG00000164692 | COL1A2   | 2.88 | 2.63E-23 |
| NEPTUNE | ENSG00000133110 | POSTN    | 2.88 | 8.75E-17 |
| NEPTUNE | ENSG00000166401 | SERPINB8 | 2.88 | 3.51E-39 |
| NEPTUNE | ENSG00000196126 | HLA-DRB1 | 2.88 | 3.61E-24 |
| NEPTUNE | ENSG00000170190 | SLC16A5  | 2.88 | 1.82E-30 |
| NEPTUNE | ENSG00000101347 | SAMHD1   | 2.89 | 1.20E-32 |
| NEPTUNE | ENSG00000101333 | PLCB4    | 2.89 | 1.21E-24 |
| NEPTUNE | ENSG00000164294 | GPX8     | 2.89 | 2.86E-39 |
| NEPTUNE | ENSG00000128283 | CDC42EP1 | 2.90 | 2.01E-41 |
| NEPTUNE | ENSG00000181649 | PHLDA2   | 2.90 | 1.74E-37 |
| NEPTUNE | ENSG00000196924 | FLNA     | 2.91 | 1.50E-30 |
| NEPTUNE | ENSG00000121900 | TMEM54   | 2.91 | 3.19E-29 |
| NEPTUNE | ENSG00000066294 | CD84     | 2.91 | 5.77E-28 |
| NEPTUNE | ENSG00000253755 | IGHGP    | 2.91 | 3.12E-09 |
| NEPTUNE | ENSG00000185811 | IKZF1    | 2.91 | 3.35E-33 |
| NEPTUNE | ENSG00000100097 | LGALS1   | 2.92 | 1.78E-29 |
| NEPTUNE | ENSG00000100368 | CSF2RB   | 2.92 | 2.02E-36 |
| NEPTUNE | ENSG00000089639 | GMIP     | 2.93 | 6.37E-43 |
| NEPTUNE | ENSG00000105639 | JAK3     | 2.93 | 5.66E-39 |
| NEPTUNE | ENSG00000146592 | CREB5    | 2.93 | 3.09E-23 |
| NEPTUNE | ENSG00000142871 | CCN1     | 2.93 | 6.37E-29 |
| NEPTUNE | ENSG00000077984 | CST7     | 2.94 | 1.65E-32 |
| NEPTUNE | ENSG00000134013 | LOXL2    | 2.94 | 2.30E-32 |
| NEPTUNE | ENSG00000175463 | TBC1D10C | 2.95 | 1.40E-33 |
| NEPTUNE | ENSG00000152137 | HSPB8    | 2.95 | 2.25E-19 |
| NEPTUNE | ENSG00000065357 | DGKA     | 2.96 | 8.06E-39 |
| NEPTUNE | ENSG00000123610 | TNFAIP6  | 2.96 | 1.37E-29 |
| NEPTUNE | ENSG00000222041 | CYTOR    | 2.97 | 3.29E-39 |
| NEPTUNE | ENSG00000160255 | ITGB2    | 2.97 | 4.48E-33 |
| NEPTUNE | ENSG00000131711 | MAP1B    | 2.98 | 4.13E-33 |
| NEPTUNE | ENSG00000168389 | MFSD2A   | 2.98 | 3.65E-23 |
| NEPTUNE | ENSG00000277734 | TRAC     | 2.98 | 8.74E-28 |
| NEPTUNE | ENSG00000164611 | PTTG1    | 2.99 | 7.01E-27 |
| NEPTUNE | ENSG00000173846 | PLK3     | 2.99 | 7.68E-36 |
| NEPTUNE | ENSG00000161921 | CXCL16   | 2.99 | 1.53E-38 |
| NEPTUNE | ENSG00000186517 | ARHGAP30 | 2.99 | 5.78E-36 |
| NEPTUNE | ENSG00000111348 | ARHGDIB  | 2.99 | 8.96E-42 |
| NEPTUNE | ENSG00000116983 | HPCAL4   | 3.00 | 1.10E-18 |
| NEPTUNE | ENSG00000259207 | ITGB3    | 3.00 | 6.49E-21 |
| NEPTUNE | ENSG00000169403 | PTAFR    | 3.00 | 3.22E-34 |
| NEPTUNE | ENSG00000171659 | GPR34    | 3.01 | 5.12E-29 |
| NEPTUNE | ENSG00000005884 | ITGA3    | 3.01 | 5.99E-33 |
| NEPTUNE | ENSG00000174938 | SEZ6L2   | 3.01 | 1.55E-28 |

|         |                 |           |      |          |
|---------|-----------------|-----------|------|----------|
| NEPTUNE | ENSG00000211652 | IGLV7-43  | 3.01 | 2.54E-21 |
| NEPTUNE | ENSG00000043462 | LCP2      | 3.01 | 7.23E-38 |
| NEPTUNE | ENSG00000153563 | CD8A      | 3.01 | 9.37E-30 |
| NEPTUNE | ENSG00000100453 | GZMB      | 3.02 | 8.01E-34 |
| NEPTUNE | ENSG00000089685 | BIRC5     | 3.02 | 9.63E-19 |
| NEPTUNE | ENSG00000100196 | KDEL3     | 3.02 | 4.71E-40 |
| NEPTUNE | ENSG00000240382 | IGKV1-17  | 3.03 | 1.30E-21 |
| NEPTUNE | ENSG00000211965 | IGHV3-49  | 3.03 | 5.94E-25 |
| NEPTUNE | ENSG00000147443 | DOK2      | 3.03 | 1.62E-36 |
| NEPTUNE | ENSG00000120738 | EGR1      | 3.03 | 1.08E-21 |
| NEPTUNE | ENSG00000137393 | RNF144B   | 3.04 | 3.89E-32 |
| NEPTUNE | ENSG00000172349 | IL16      | 3.04 | 3.20E-32 |
| NEPTUNE | ENSG00000120708 | TGFBI     | 3.04 | 7.08E-32 |
| NEPTUNE | ENSG00000136250 | AOAH      | 3.05 | 2.85E-33 |
| NEPTUNE | ENSG00000145416 | MARCHF1   | 3.05 | 7.12E-37 |
| NEPTUNE | ENSG00000103196 | CRISPLD2  | 3.05 | 1.04E-26 |
| NEPTUNE | ENSG00000106624 | AEBP1     | 3.05 | 9.68E-31 |
| NEPTUNE | ENSG00000088826 | SMOX      | 3.06 | 5.87E-36 |
| NEPTUNE | ENSG00000125398 | SOX9      | 3.07 | 3.88E-19 |
| NEPTUNE | ENSG00000138131 | LOXL4     | 3.07 | 4.70E-28 |
| NEPTUNE | ENSG00000143387 | CTSK      | 3.07 | 2.55E-22 |
| NEPTUNE | ENSG00000132514 | CLEC10A   | 3.08 | 3.25E-34 |
| NEPTUNE | ENSG00000154589 | LY96      | 3.08 | 1.58E-33 |
| NEPTUNE | ENSG00000070190 | DAPP1     | 3.08 | 1.22E-37 |
| NEPTUNE | ENSG00000077420 | APBB1IP   | 3.09 | 9.44E-23 |
| NEPTUNE | ENSG00000091986 | CCDC80    | 3.09 | 1.48E-25 |
| NEPTUNE | ENSG00000076706 | MCAM      | 3.09 | 3.36E-32 |
| NEPTUNE | ENSG00000167208 | SNX20     | 3.09 | 4.99E-38 |
| NEPTUNE | ENSG00000167779 | IGFBP6    | 3.09 | 8.98E-26 |
| NEPTUNE | ENSG00000204482 | LST1      | 3.10 | 3.31E-35 |
| NEPTUNE | ENSG00000185862 | EVI2B     | 3.10 | 5.54E-38 |
| NEPTUNE | ENSG00000102524 | TNFSF13B  | 3.10 | 1.55E-37 |
| NEPTUNE | ENSG00000167601 | AXL       | 3.10 | 1.16E-32 |
| NEPTUNE | ENSG00000131771 | PPP1R1B   | 3.10 | 1.41E-26 |
| NEPTUNE | ENSG00000047457 | CP        | 3.11 | 4.15E-32 |
| NEPTUNE | ENSG00000086730 | LAT2      | 3.11 | 3.67E-40 |
| NEPTUNE | ENSG00000105664 | COMP      | 3.12 | 5.25E-22 |
| NEPTUNE | ENSG00000242574 | HLA-DMB   | 3.12 | 2.43E-41 |
| NEPTUNE | ENSG00000131747 | TOP2A     | 3.13 | 3.23E-19 |
| NEPTUNE | ENSG00000168918 | INPP5D    | 3.13 | 7.12E-37 |
| NEPTUNE | ENSG00000145721 | LIX1      | 3.13 | 1.22E-28 |
| NEPTUNE | ENSG00000155926 | SLA       | 3.14 | 1.43E-35 |
| NEPTUNE | ENSG00000101336 | HCK       | 3.14 | 9.31E-38 |
| NEPTUNE | ENSG00000156738 | MS4A1     | 3.14 | 1.73E-26 |
| NEPTUNE | ENSG00000175063 | UBE2C     | 3.15 | 2.16E-21 |
| NEPTUNE | ENSG00000096433 | ITPR3     | 3.15 | 3.29E-35 |
| NEPTUNE | ENSG00000138119 | MYOF      | 3.15 | 3.37E-38 |
| NEPTUNE | ENSG00000112799 | LY86      | 3.16 | 1.82E-34 |
| NEPTUNE | ENSG00000094755 | GABRP     | 3.16 | 2.64E-20 |
| NEPTUNE | ENSG00000234380 | LINC01426 | 3.16 | 1.25E-46 |
| NEPTUNE | ENSG00000145632 | PLK2      | 3.19 | 3.40E-38 |
| NEPTUNE | ENSG00000171860 | C3AR1     | 3.19 | 9.89E-33 |
| NEPTUNE | ENSG00000134247 | PTGFRN    | 3.20 | 2.70E-40 |



|         |                 |              |      |          |
|---------|-----------------|--------------|------|----------|
| NEPTUNE | ENSG00000163220 | S100A9       | 3.20 | 1.66E-21 |
| NEPTUNE | ENSG00000115963 | RND3         | 3.21 | 7.96E-40 |
| NEPTUNE | ENSG00000166428 | PLD4         | 3.21 | 5.72E-35 |
| NEPTUNE | ENSG00000095970 | TREM2        | 3.21 | 5.26E-29 |
| NEPTUNE | ENSG00000266094 | RASSF5       | 3.21 | 3.42E-36 |
| NEPTUNE | ENSG00000075884 | ARHGAP15     | 3.22 | 1.57E-33 |
| NEPTUNE | ENSG00000142089 | IFITM3       | 3.22 | 1.57E-35 |
| NEPTUNE | ENSG00000006118 | TMEM132A     | 3.22 | 1.96E-33 |
| NEPTUNE | ENSG00000198223 | CSF2RA       | 3.23 | 9.88E-42 |
| NEPTUNE | ENSG00000134516 | DOCK2        | 3.23 | 1.81E-34 |
| NEPTUNE | ENSG00000189143 | CLDN4        | 3.23 | 7.74E-37 |
| NEPTUNE | ENSG00000169508 | GPR183       | 3.23 | 4.67E-31 |
| NEPTUNE | ENSG00000000005 | TNMD         | 3.23 | 8.69E-20 |
| NEPTUNE | ENSG00000124766 | SOX4         | 3.24 | 4.12E-32 |
| NEPTUNE | ENSG00000168542 | COL3A1       | 3.26 | 4.17E-21 |
| NEPTUNE | ENSG00000204287 | HLA-DRA      | 3.26 | 2.54E-38 |
| NEPTUNE | ENSG00000149781 | FERMT3       | 3.26 | 7.12E-37 |
| NEPTUNE | ENSG00000122862 | SRGN         | 3.27 | 5.35E-37 |
| NEPTUNE | ENSG00000175130 | MARCKSL1     | 3.27 | 6.11E-43 |
| NEPTUNE | ENSG00000145287 | PLAC8        | 3.28 | 1.25E-37 |
| NEPTUNE | ENSG00000111341 | MGP          | 3.29 | 8.83E-27 |
| NEPTUNE | ENSG00000239713 | APOBEC3G     | 3.29 | 6.11E-39 |
| NEPTUNE | ENSG00000138772 | ANXA3        | 3.29 | 5.81E-43 |
| NEPTUNE | ENSG00000184454 | NCMAP        | 3.29 | 2.04E-29 |
| NEPTUNE | ENSG00000159840 | ZYX          | 3.29 | 4.39E-39 |
| NEPTUNE | ENSG00000197629 | MPEG1        | 3.29 | 8.03E-30 |
| NEPTUNE | ENSG00000132965 | ALOX5AP      | 3.29 | 2.88E-40 |
| NEPTUNE | ENSG00000275063 | LOC102723407 | 3.29 | 5.94E-22 |
| NEPTUNE | ENSG00000072694 | FCGR2B       | 3.29 | 3.35E-33 |
| NEPTUNE | ENSG00000125872 | LRRN4        | 3.30 | 6.26E-35 |
| NEPTUNE | ENSG00000082196 | C1QTNF3      | 3.31 | 5.00E-28 |
| NEPTUNE | ENSG00000104951 | IL4I1        | 3.31 | 5.16E-27 |
| NEPTUNE | ENSG00000240065 | PSMB9        | 3.31 | 1.12E-38 |
| NEPTUNE | ENSG00000169429 | CXCL8        | 3.31 | 1.65E-38 |
| NEPTUNE | ENSG00000101198 | NKAIN4       | 3.33 | 4.04E-15 |
| NEPTUNE | ENSG00000243290 | IGKV1-12     | 3.33 | 1.06E-22 |
| NEPTUNE | ENSG00000175315 | CST6         | 3.33 | 1.38E-35 |
| NEPTUNE | ENSG00000164764 | SBSPON       | 3.33 | 2.33E-34 |
| NEPTUNE | ENSG00000185201 | IFITM2       | 3.33 | 3.54E-43 |
| NEPTUNE | ENSG00000110324 | IL10RA       | 3.34 | 1.02E-33 |
| NEPTUNE | ENSG00000162894 | FCMR         | 3.34 | 4.14E-38 |
| NEPTUNE | ENSG00000165168 | CYBB         | 3.35 | 4.67E-33 |
| NEPTUNE | ENSG00000140749 | IGSF6        | 3.36 | 1.76E-31 |
| NEPTUNE | ENSG00000204252 | HLA-DOA      | 3.36 | 1.37E-29 |
| NEPTUNE | ENSG00000196923 | PDLIM7       | 3.37 | 5.36E-49 |
| NEPTUNE | ENSG00000198502 | HLA-DRB5     | 3.38 | 9.37E-11 |
| NEPTUNE | ENSG00000072110 | ACTN1        | 3.38 | 1.61E-41 |
| NEPTUNE | ENSG00000242371 | IGKV1-39     | 3.38 | 2.74E-26 |
| NEPTUNE | ENSG00000114013 | CD86         | 3.38 | 7.83E-42 |
| NEPTUNE | ENSG00000158488 | CD1E         | 3.39 | 3.78E-35 |
| NEPTUNE | ENSG00000124762 | CDKN1A       | 3.39 | 1.09E-23 |
| NEPTUNE | ENSG00000163563 | MNDA         | 3.40 | 4.14E-35 |
| NEPTUNE | ENSG00000144810 | COL8A1       | 3.40 | 1.61E-27 |

|         |                 |               |      |          |
|---------|-----------------|---------------|------|----------|
| NEPTUNE | ENSG00000136999 | CCN3          | 3.40 | 5.06E-27 |
| NEPTUNE | ENSG00000251546 | IGKV1D-39     | 3.41 | 1.08E-25 |
| NEPTUNE | ENSG00000166482 | MFAP4         | 3.42 | 3.13E-23 |
| NEPTUNE | ENSG00000178752 | ERFE          | 3.42 | 1.98E-34 |
| NEPTUNE | ENSG00000178860 | MSC           | 3.42 | 7.94E-33 |
| NEPTUNE | ENSG00000139278 | GLIPR1        | 3.43 | 2.50E-45 |
| NEPTUNE | ENSG00000142227 | EMP3          | 3.44 | 4.93E-43 |
| NEPTUNE | ENSG00000115226 | FNDC4         | 3.44 | 1.58E-42 |
| NEPTUNE | ENSG00000176014 | TUBB6         | 3.44 | 1.18E-42 |
| NEPTUNE | ENSG00000130429 | ARPC1B        | 3.44 | 5.50E-49 |
| NEPTUNE | ENSG00000099282 | TSPAN15       | 3.44 | 4.25E-42 |
| NEPTUNE | ENSG00000263961 | RHEX          | 3.45 | 2.31E-18 |
| NEPTUNE | ENSG00000163191 | S100A11       | 3.45 | 9.25E-42 |
| NEPTUNE | ENSG00000196754 | S100A2        | 3.46 | 4.70E-23 |
| NEPTUNE | ENSG00000099958 | DERL3         | 3.46 | 7.48E-35 |
| NEPTUNE | ENSG00000240864 | IGKV1-16      | 3.47 | 1.09E-24 |
| NEPTUNE | ENSG00000164932 | CTHRC1        | 3.47 | 2.29E-45 |
| NEPTUNE | ENSG00000126353 | CCR7          | 3.49 | 1.10E-30 |
| NEPTUNE | ENSG00000089327 | FXD5          | 3.49 | 4.18E-37 |
| NEPTUNE | ENSG00000085265 | FCN1          | 3.50 | 7.95E-35 |
| NEPTUNE | ENSG00000180353 | HCLS1         | 3.50 | 4.22E-40 |
| NEPTUNE | ENSG00000165457 | FOLR2         | 3.51 | 2.58E-29 |
| NEPTUNE | ENSG00000243264 | IGKV2D-29     | 3.51 | 1.89E-18 |
| NEPTUNE | ENSG00000145649 | GZMA          | 3.51 | 2.01E-33 |
| NEPTUNE | ENSG00000145423 | SFRP2         | 3.52 | 4.58E-20 |
| NEPTUNE | ENSG00000120885 | CLU           | 3.52 | 1.06E-26 |
| NEPTUNE | ENSG00000163751 | CPA3          | 3.53 | 1.02E-24 |
| NEPTUNE | ENSG00000130775 | THEMIS2       | 3.54 | 1.89E-39 |
| NEPTUNE | ENSG00000198959 | TGM2          | 3.54 | 8.39E-33 |
| NEPTUNE | ENSG00000106366 | SERPINE1      | 3.55 | 2.00E-29 |
| NEPTUNE | ENSG00000185215 | TNFAIP2       | 3.55 | 1.60E-34 |
| NEPTUNE | ENSG00000163565 | IFI16         | 3.55 | 5.94E-43 |
| NEPTUNE | ENSG00000171564 | FGB           | 3.55 | 1.22E-05 |
| NEPTUNE | ENSG00000166592 | RRAD          | 3.57 | 3.26E-31 |
| NEPTUNE | ENSG00000177575 | CD163         | 3.57 | 1.67E-31 |
| NEPTUNE | ENSG00000166927 | MS4A7         | 3.57 | 4.18E-34 |
| NEPTUNE | ENSG00000162645 | GBP2          | 3.58 | 3.07E-42 |
| NEPTUNE | ENSG00000280411 | IGHV1-69D     | 3.58 | 3.49E-26 |
| NEPTUNE | ENSG00000105369 | CD79A         | 3.58 | 6.31E-31 |
| NEPTUNE | ENSG00000163435 | ELF3          | 3.59 | 1.18E-39 |
| NEPTUNE | ENSG00000185885 | IFITM1        | 3.59 | 9.69E-33 |
| NEPTUNE | ENSG00000177989 | ODF3B         | 3.59 | 5.38E-38 |
| NEPTUNE | ENSG00000140931 | CMTM3         | 3.60 | 5.34E-41 |
| NEPTUNE | ENSG00000102007 | PLP2          | 3.61 | 5.92E-47 |
| NEPTUNE | ENSG00000168685 | IL7R          | 3.61 | 2.38E-30 |
| NEPTUNE | ENSG00000100979 | PLTP          | 3.61 | 3.19E-17 |
| NEPTUNE | ENSG00000168386 | FILIP1L       | 3.61 | 3.88E-42 |
| NEPTUNE | ENSG00000123338 | NCKAP1L       | 3.62 | 5.16E-36 |
| NEPTUNE | ENSG00000211649 | IGLV7-46      | 3.63 | 4.40E-25 |
| NEPTUNE | ENSG00000034510 | TMSB10/TMSB4X | 3.63 | 1.26E-40 |
| NEPTUNE | ENSG00000244509 | APOBEC3C      | 3.64 | 1.25E-46 |
| NEPTUNE | ENSG00000145623 | OSMR          | 3.64 | 7.53E-39 |
| NEPTUNE | ENSG00000026025 | VIM           | 3.66 | 3.34E-41 |

|         |                 |               |      |          |
|---------|-----------------|---------------|------|----------|
| NEPTUNE | ENSG00000182578 | CSF1R         | 3.66 | 5.28E-34 |
| NEPTUNE | ENSG00000070404 | FSTL3         | 3.69 | 1.09E-33 |
| NEPTUNE | ENSG00000118971 | CCND2         | 3.70 | 7.46E-32 |
| NEPTUNE | ENSG00000165887 | ANKRD2        | 3.71 | 3.52E-25 |
| NEPTUNE | ENSG00000169413 | RNASE6        | 3.71 | 7.75E-40 |
| NEPTUNE | ENSG00000167613 | LAIR1         | 3.72 | 2.22E-33 |
| NEPTUNE | ENSG00000110079 | MS4A4A        | 3.73 | 1.83E-32 |
| NEPTUNE | ENSG00000158481 | CD1C          | 3.73 | 3.41E-39 |
| NEPTUNE | ENSG00000172965 | MIR4435-2HG   | 3.74 | 1.18E-38 |
| NEPTUNE | ENSG00000064886 | CHI3L2        | 3.75 | 2.31E-33 |
| NEPTUNE | ENSG00000211962 | IGHV1-46      | 3.76 | 1.86E-27 |
| NEPTUNE | ENSG00000211964 | IGHV3-48      | 3.78 | 1.81E-24 |
| NEPTUNE | ENSG00000127129 | EDN2          | 3.78 | 5.57E-36 |
| NEPTUNE | ENSG00000122694 | GLIPR2        | 3.78 | 4.47E-44 |
| NEPTUNE | ENSG00000162458 | FBLIM1        | 3.79 | 5.15E-45 |
| NEPTUNE | ENSG00000203747 | FCGR3A/FCGR3B | 3.79 | 1.32E-34 |
| NEPTUNE | ENSG00000224650 | IGHV3-74      | 3.81 | 9.26E-29 |
| NEPTUNE | ENSG00000169245 | CXCL10        | 3.81 | 1.28E-23 |
| NEPTUNE | ENSG00000173372 | C1QA          | 3.85 | 6.36E-33 |
| NEPTUNE | ENSG00000005059 | MCUB          | 3.85 | 4.72E-48 |
| NEPTUNE | ENSG00000143954 | REG3G         | 3.86 | 7.22E-26 |
| NEPTUNE | ENSG00000022267 | FHL1          | 3.86 | 1.44E-33 |
| NEPTUNE | ENSG00000137752 | CASP1         | 3.87 | 3.81E-45 |
| NEPTUNE | ENSG00000223865 | HLA-DPB1      | 3.88 | 1.99E-39 |
| NEPTUNE | ENSG00000108551 | RASD1         | 3.88 | 5.63E-19 |
| NEPTUNE | ENSG00000146242 | TPBG          | 3.88 | 4.44E-42 |
| NEPTUNE | ENSG00000211956 | IGHV4-34      | 3.88 | 1.72E-33 |
| NEPTUNE | ENSG00000130508 | PXDN          | 3.89 | 3.39E-35 |
| NEPTUNE | ENSG00000136490 | LIMD2         | 3.90 | 4.99E-48 |
| NEPTUNE | ENSG00000110876 | SELPLG        | 3.90 | 1.98E-41 |
| NEPTUNE | ENSG00000122122 | SASH3         | 3.90 | 2.17E-39 |
| NEPTUNE | ENSG00000143110 | C1orf162      | 3.90 | 2.90E-42 |
| NEPTUNE | ENSG00000121807 | CCR2          | 3.91 | 3.09E-40 |
| NEPTUNE | ENSG00000090339 | ICAM1         | 3.91 | 6.28E-30 |
| NEPTUNE | ENSG00000011422 | PLAUR         | 3.93 | 1.64E-44 |
| NEPTUNE | ENSG00000132274 | TRIM22        | 3.94 | 2.65E-37 |
| NEPTUNE | ENSG00000140968 | IRF8          | 3.94 | 9.77E-34 |
| NEPTUNE | ENSG00000159189 | C1QC          | 3.94 | 1.66E-34 |
| NEPTUNE | ENSG00000211941 | IGHV3-11      | 3.95 | 8.23E-27 |
| NEPTUNE | ENSG00000163347 | CLDN1         | 3.96 | 8.18E-34 |
| NEPTUNE | ENSG00000115009 | CCL20         | 3.97 | 1.82E-23 |
| NEPTUNE | ENSG00000172183 | ISG20         | 3.98 | 1.72E-39 |
| NEPTUNE | ENSG00000227507 | LTB           | 3.98 | 2.15E-38 |
| NEPTUNE | ENSG00000118849 | RARRES1       | 3.98 | 2.32E-33 |
| NEPTUNE | ENSG00000160593 | JAML          | 3.99 | 6.51E-40 |
| NEPTUNE | ENSG00000011600 | TYROBP        | 3.99 | 1.06E-33 |
| NEPTUNE | ENSG00000211943 | IGHV3-15      | 3.99 | 7.93E-25 |
| NEPTUNE | ENSG00000198851 | CD3E          | 4.00 | 8.28E-37 |
| NEPTUNE | ENSG00000211937 | IGHV2-5       | 4.01 | 1.28E-22 |
| NEPTUNE | ENSG00000244575 | IGKV1-27      | 4.01 | 6.42E-28 |
| NEPTUNE | ENSG00000081237 | PTPRC         | 4.02 | 3.14E-34 |
| NEPTUNE | ENSG00000159403 | C1R           | 4.02 | 4.53E-37 |
| NEPTUNE | ENSG00000131016 | AKAP12        | 4.05 | 3.86E-28 |

|         |                 |              |      |          |
|---------|-----------------|--------------|------|----------|
| NEPTUNE | ENSG00000158869 | FCER1G       | 4.07 | 2.04E-35 |
| NEPTUNE | ENSG00000182718 | ANXA2        | 4.09 | 1.95E-47 |
| NEPTUNE | ENSG00000134245 | WNT2B        | 4.09 | 8.04E-36 |
| NEPTUNE | ENSG00000231389 | HLA-DPA1     | 4.10 | 1.28E-40 |
| NEPTUNE | ENSG00000079931 | MOXD1        | 4.10 | 3.67E-32 |
| NEPTUNE | ENSG00000108821 | COL1A1       | 4.10 | 6.44E-25 |
| NEPTUNE | ENSG00000144802 | NFKBIZ       | 4.10 | 2.17E-39 |
| NEPTUNE | ENSG00000211898 | IGHD         | 4.11 | 1.67E-18 |
| NEPTUNE | ENSG00000155659 | VSIG4        | 4.13 | 6.37E-36 |
| NEPTUNE | ENSG00000106541 | AGR2         | 4.14 | 2.00E-28 |
| NEPTUNE | ENSG00000026751 | SLAMF7       | 4.14 | 3.84E-31 |
| NEPTUNE | ENSG00000271503 | CCL5         | 4.15 | 1.01E-30 |
| NEPTUNE | ENSG00000224373 | IGHV4-59     | 4.17 | 9.15E-29 |
| NEPTUNE | ENSG00000168077 | SCARA3       | 4.19 | 1.41E-30 |
| NEPTUNE | ENSG00000211638 | IGLV8-61     | 4.24 | 1.52E-19 |
| NEPTUNE | ENSG00000167552 | TUBA1A       | 4.24 | 1.22E-43 |
| NEPTUNE | ENSG00000167286 | CD3D         | 4.25 | 3.57E-37 |
| NEPTUNE | ENSG00000186340 | THBS2        | 4.26 | 8.34E-31 |
| NEPTUNE | ENSG00000025708 | TYMP         | 4.26 | 3.35E-32 |
| NEPTUNE | ENSG00000211637 | IGLV4-69     | 4.30 | 1.29E-23 |
| NEPTUNE | ENSG00000023445 | BIRC3        | 4.30 | 1.43E-41 |
| NEPTUNE | ENSG00000141934 | PLPP2        | 4.30 | 7.88E-37 |
| NEPTUNE | ENSG00000116824 | CD2          | 4.33 | 2.40E-38 |
| NEPTUNE | ENSG00000211751 | TRBC1        | 4.35 | 2.57E-37 |
| NEPTUNE | ENSG00000176170 | SPHK1        | 4.35 | 3.54E-39 |
| NEPTUNE | ENSG00000115956 | PLEK         | 4.39 | 3.52E-40 |
| NEPTUNE | ENSG00000026508 | CD44         | 4.41 | 8.39E-39 |
| NEPTUNE | ENSG00000115641 | FHL2         | 4.43 | 6.48E-43 |
| NEPTUNE | ENSG00000211955 | IGHV3-33     | 4.44 | 2.04E-29 |
| NEPTUNE | ENSG00000211669 | IGLV3-10     | 4.44 | 1.50E-24 |
| NEPTUNE | ENSG00000139329 | LUM          | 4.47 | 2.43E-31 |
| NEPTUNE | ENSG00000136997 | MYC          | 4.49 | 3.40E-34 |
| NEPTUNE | ENSG00000173432 | SAA1         | 4.52 | 7.51E-27 |
| NEPTUNE | ENSG00000167767 | KRT80        | 4.53 | 1.16E-37 |
| NEPTUNE | ENSG00000088992 | TESC         | 4.54 | 3.15E-41 |
| NEPTUNE | ENSG00000115828 | QPCT         | 4.58 | 1.19E-36 |
| NEPTUNE | ENSG00000110077 | MS4A6A       | 4.61 | 3.32E-40 |
| NEPTUNE | ENSG00000188404 | SELL         | 4.66 | 8.79E-40 |
| NEPTUNE | ENSG00000211772 | TRBC2        | 4.68 | 4.66E-37 |
| NEPTUNE | ENSG00000007062 | PROM1        | 4.69 | 1.46E-30 |
| NEPTUNE | ENSG00000211947 | IGHV3-21     | 4.70 | 5.49E-27 |
| NEPTUNE | ENSG00000182866 | LCK          | 4.72 | 4.50E-40 |
| NEPTUNE | ENSG00000184557 | SOCS3        | 4.73 | 8.71E-35 |
| NEPTUNE | ENSG00000211966 | IGHV5-51     | 4.73 | 3.68E-32 |
| NEPTUNE | ENSG00000135046 | ANXA1        | 4.74 | 5.81E-43 |
| NEPTUNE | ENSG00000182326 | C1S          | 4.74 | 5.54E-38 |
| NEPTUNE | ENSG00000102879 | CORO1A       | 4.76 | 3.54E-43 |
| NEPTUNE | ENSG00000211934 | IGHV1-2      | 4.77 | 7.40E-24 |
| NEPTUNE | ENSG00000211945 | IGHV1-18     | 4.82 | 4.59E-29 |
| NEPTUNE | ENSG00000171476 | HOPX         | 4.86 | 8.96E-42 |
| NEPTUNE | ENSG00000162511 | LAPTM5       | 4.90 | 7.97E-44 |
| NEPTUNE | ENSG00000172236 | TPSAB1/TPSB2 | 4.90 | 1.44E-24 |
| NEPTUNE | ENSG00000130592 | LSP1         | 4.92 | 6.31E-40 |

|         |                 |           |      |          |
|---------|-----------------|-----------|------|----------|
| NEPTUNE | ENSG00000137077 | CCL21     | 4.97 | 3.38E-24 |
| NEPTUNE | ENSG00000163131 | CTSS      | 4.99 | 3.51E-39 |
| NEPTUNE | ENSG00000113249 | HAVCR1    | 5.03 | 6.84E-25 |
| NEPTUNE | ENSG00000173369 | C1QB      | 5.04 | 1.58E-32 |
| NEPTUNE | ENSG00000128340 | RAC2      | 5.06 | 5.81E-45 |
| NEPTUNE | ENSG00000143119 | CD53      | 5.12 | 1.82E-44 |
| NEPTUNE | ENSG00000110492 | MDK       | 5.12 | 9.72E-43 |
| NEPTUNE | ENSG00000211673 | IGLV3-1   | 5.17 | 4.01E-27 |
| NEPTUNE | ENSG00000179639 | FCER1A    | 5.20 | 8.92E-31 |
| NEPTUNE | ENSG00000179344 | HLA-DQB1  | 5.21 | 2.99E-26 |
| NEPTUNE | ENSG00000196735 | HLA-DQA1  | 5.29 | 3.70E-31 |
| NEPTUNE | ENSG00000211938 | IGHV3-7   | 5.29 | 3.53E-31 |
| NEPTUNE | ENSG00000171236 | LRG1      | 5.38 | 4.09E-37 |
| NEPTUNE | ENSG00000169442 | CD52      | 5.42 | 1.57E-36 |
| NEPTUNE | ENSG00000105825 | TFPI2     | 5.42 | 1.72E-41 |
| NEPTUNE | ENSG00000125730 | C3        | 5.42 | 2.58E-28 |
| NEPTUNE | ENSG00000041982 | TNC       | 5.44 | 1.25E-32 |
| NEPTUNE | ENSG00000211959 | IGHV4-39  | 5.45 | 7.76E-27 |
| NEPTUNE | ENSG00000211949 | IGHV3-23  | 5.46 | 2.45E-29 |
| NEPTUNE | ENSG00000006327 | TNFRSF12A | 5.51 | 2.05E-33 |
| NEPTUNE | ENSG00000136167 | LCP1      | 5.53 | 4.68E-38 |
| NEPTUNE | ENSG00000243238 | IGKV2-30  | 5.58 | 2.37E-30 |
| NEPTUNE | ENSG00000188042 | ARL4C     | 5.62 | 2.65E-37 |
| NEPTUNE | ENSG00000170579 | DLGAP1    | 5.74 | 4.17E-40 |
| NEPTUNE | ENSG00000157890 | MEGF11    | 5.82 | 3.73E-29 |
| NEPTUNE | ENSG00000147168 | IL2RG     | 5.89 | 5.60E-43 |
| NEPTUNE | ENSG00000241755 | IGKV1-9   | 5.92 | 5.23E-27 |
| NEPTUNE | ENSG00000270550 | IGHV3-30  | 5.93 | 7.50E-29 |
| NEPTUNE | ENSG00000101443 | WFDC2     | 5.95 | 7.12E-37 |
| NEPTUNE | ENSG00000170476 | MZB1      | 5.99 | 5.87E-36 |
| NEPTUNE | ENSG00000108691 | CCL2      | 6.13 | 4.60E-37 |
| NEPTUNE | ENSG00000211640 | IGLV6-57  | 6.16 | 4.40E-30 |
| NEPTUNE | ENSG00000157765 | SLC34A2   | 6.17 | 1.97E-25 |
| NEPTUNE | ENSG00000278196 | IGLV2-8   | 6.19 | 1.17E-28 |
| NEPTUNE | ENSG00000058085 | LAMC2     | 6.32 | 1.27E-34 |
| NEPTUNE | ENSG00000090382 | LYZ       | 6.37 | 6.47E-32 |
| NEPTUNE | ENSG00000102265 | TIMP1     | 6.43 | 3.75E-42 |
| NEPTUNE | ENSG00000211668 | IGLV2-11  | 6.46 | 5.69E-28 |
| NEPTUNE | ENSG00000012779 | ALOX5     | 6.52 | 3.10E-46 |
| NEPTUNE | ENSG00000211648 | IGLV1-47  | 6.58 | 2.94E-26 |
| NEPTUNE | ENSG00000077274 | CAPN6     | 6.62 | 1.07E-31 |
| NEPTUNE | ENSG00000002587 | HS3ST1    | 6.63 | 1.51E-46 |
| NEPTUNE | ENSG00000163739 | CXCL1     | 6.72 | 7.05E-41 |
| NEPTUNE | ENSG00000159674 | SPON2     | 6.73 | 1.52E-34 |
| NEPTUNE | ENSG00000211651 | IGLV1-44  | 6.81 | 6.49E-29 |
| NEPTUNE | ENSG00000211659 | IGLV3-25  | 7.05 | 3.06E-31 |
| NEPTUNE | ENSG00000213088 | ACKR1     | 7.27 | 3.39E-36 |
| NEPTUNE | ENSG00000115221 | ITGB6     | 7.81 | 2.32E-35 |
| NEPTUNE | ENSG00000211660 | IGLV2-23  | 7.82 | 2.56E-30 |
| NEPTUNE | ENSG00000038427 | VCAN      | 8.02 | 2.79E-42 |
| NEPTUNE | ENSG00000211890 | IGHA2     | 8.24 | 4.20E-30 |
| NEPTUNE | ENSG00000211663 | IGLV3-19  | 8.29 | 3.10E-33 |
| NEPTUNE | ENSG00000172724 | CCL19     | 8.57 | 5.64E-32 |

|           |                 |             |       |          |
|-----------|-----------------|-------------|-------|----------|
| NEPTUNE   | ENSG00000211666 | IGLV2-14    | 8.82  | 1.71E-30 |
| NEPTUNE   | ENSG00000124875 | CXCL6       | 8.91  | 3.69E-38 |
| NEPTUNE   | ENSG00000211662 | IGLV3-21    | 9.16  | 2.39E-32 |
| NEPTUNE   | ENSG00000148346 | LCN2        | 9.18  | 3.47E-40 |
| NEPTUNE   | ENSG00000241351 | IGKV3-11    | 9.84  | 4.45E-32 |
| NEPTUNE   | ENSG00000211892 | IGHG4       | 9.91  | 2.65E-24 |
| NEPTUNE   | ENSG00000211653 | IGLV1-40    | 9.95  | 1.85E-35 |
| NEPTUNE   | ENSG00000244437 | IGKV3-15    | 10.06 | 6.19E-36 |
| NEPTUNE   | ENSG00000211679 | IGLC3       | 10.89 | 3.02E-31 |
| NEPTUNE   | ENSG00000243466 | IGKV1-5     | 10.99 | 2.64E-29 |
| NEPTUNE   | ENSG00000137673 | MMP7        | 11.00 | 4.06E-34 |
| NEPTUNE   | ENSG00000124107 | SLPI        | 11.30 | 9.02E-34 |
| NEPTUNE   | ENSG00000115386 | REG1A       | 11.98 | 8.47E-25 |
| NEPTUNE   | ENSG00000211677 | IGLC2       | 12.08 | 7.58E-33 |
| NEPTUNE   | ENSG00000211897 | IGHG3       | 12.45 | 1.73E-28 |
| NEPTUNE   | ENSG00000132465 | JCHAIN      | 13.05 | 2.00E-31 |
| NEPTUNE   | ENSG00000239951 | IGKV3-20    | 13.26 | 4.49E-32 |
| NEPTUNE   | ENSG00000211893 | IGHG2       | 13.84 | 1.63E-31 |
| NEPTUNE   | ENSG00000211899 | IGHM        | 14.83 | 9.16E-32 |
| NEPTUNE   | ENSG00000211598 | IGKV4-1     | 15.07 | 4.47E-31 |
| NEPTUNE   | ENSG00000166741 | NNMT        | 16.62 | 7.23E-44 |
| NEPTUNE   | ENSG00000211895 | IGHA1       | 17.22 | 4.35E-29 |
| NEPTUNE   | ENSG00000012223 | LTF         | 21.48 | 6.34E-32 |
| NEPTUNE   | ENSG00000211896 | IGHG1       | 23.80 | 1.04E-28 |
| NEPTUNE   | ENSG00000211592 | IGKC        | 28.62 | 2.88E-30 |
| H3 Africa | ENSG00000178363 | CALML3      | -7.82 | 3.37E-03 |
| H3 Africa | ENSG00000137868 | STRA6       | -6.44 | 4.49E-05 |
| H3 Africa | ENSG00000244067 | GSTA2       | -6.15 | 6.50E-04 |
| H3 Africa | ENSG00000172482 | AGXT        | -5.82 | 2.80E-03 |
| H3 Africa | ENSG00000162391 | FAM151A     | -5.71 | 3.12E-05 |
| H3 Africa | ENSG00000146809 | ASB15       | -5.59 | 5.98E-05 |
| H3 Africa | ENSG00000136943 | CTSV        | -5.46 | 7.39E-05 |
| H3 Africa | ENSG00000144115 | THNSL2      | -5.22 | 1.66E-04 |
| H3 Africa | ENSG00000255274 | SMIM35      | -4.85 | 6.59E-04 |
| H3 Africa | ENSG00000186868 | MAPT        | -4.83 | 1.38E-04 |
| H3 Africa | ENSG00000178772 | CPN2        | -4.72 | 1.53E-02 |
| H3 Africa | ENSG00000134864 | GGACT       | -4.57 | 2.18E-05 |
| H3 Africa | ENSG00000138798 | EGF         | -4.47 | 6.47E-05 |
| H3 Africa | ENSG00000134042 | MRO         | -4.46 | 1.93E-03 |
| H3 Africa | ENSG00000198569 | SLC34A3     | -4.38 | 3.50E-05 |
| H3 Africa | ENSG00000167748 | KLK1        | -4.37 | 4.87E-02 |
| H3 Africa | ENSG00000187048 | CYP4A11     | -4.17 | 5.48E-04 |
| H3 Africa | ENSG00000148795 | CYP17A1     | -4.13 | 1.52E-02 |
| H3 Africa | ENSG00000122194 | PLG         | -4.02 | 8.88E-04 |
| H3 Africa | ENSG00000184227 | ACOT1       | -3.89 | 1.54E-03 |
| H3 Africa | ENSG00000162365 | CYP4A22     | -3.89 | 1.04E-02 |
| H3 Africa | ENSG00000243955 | GSTA1       | -3.86 | 2.66E-03 |
| H3 Africa | ENSG00000015413 | DPEP1       | -3.84 | 1.11E-05 |
| H3 Africa | ENSG00000172478 | MAB21L4     | -3.80 | 6.76E-03 |
| H3 Africa | ENSG00000261795 | RP11_90P131 | -3.79 | 1.94E-02 |
| H3 Africa | ENSG00000158865 | SLC5A11     | -3.78 | 3.37E-03 |
| H3 Africa | ENSG00000171124 | FUT3        | -3.72 | 2.64E-03 |
| H3 Africa | ENSG00000131482 | G6PC1       | -3.72 | 8.26E-03 |

|           |                 |                    |       |          |
|-----------|-----------------|--------------------|-------|----------|
| H3 Africa | ENSG00000172425 | TTC36              | -3.71 | 5.68E-05 |
| H3 Africa | ENSG00000122121 | XPNPEP2            | -3.68 | 8.36E-04 |
| H3 Africa | ENSG00000158104 | HPD                | -3.58 | 1.06E-04 |
| H3 Africa | ENSG00000149452 | SLC22A8            | -3.57 | 1.57E-04 |
| H3 Africa | ENSG00000099994 | SUSD2              | -3.55 | 8.08E-05 |
| H3 Africa | ENSG00000079557 | AFM                | -3.52 | 4.05E-04 |
| H3 Africa | ENSG00000226733 | LOC100505985       | -3.51 | 2.63E-02 |
| H3 Africa | ENSG00000198695 | MT-ND6             | -3.46 | 8.67E-04 |
| H3 Africa | ENSG00000100889 | PCK2               | -3.46 | 3.49E-06 |
| H3 Africa | ENSG00000186466 | AQP7P1             | -3.39 | 1.41E-03 |
| H3 Africa | ENSG00000110887 | DAO                | -3.31 | 1.80E-05 |
| H3 Africa | ENSG00000164303 | ENPP6              | -3.30 | 5.18E-04 |
| H3 Africa | ENSG00000186335 | SLC36A2            | -3.29 | 4.97E-04 |
| H3 Africa | ENSG00000123689 | G0S2               | -3.27 | 1.24E-03 |
| H3 Africa | ENSG00000167741 | GGT6               | -3.23 | 7.23E-05 |
| H3 Africa | ENSG00000138678 | GPAT3              | -3.22 | 2.96E-06 |
| H3 Africa | ENSG00000113905 | HRG                | -3.22 | 2.41E-03 |
| H3 Africa | ENSG00000091583 | APOH               | -3.21 | 1.55E-02 |
| H3 Africa | ENSG00000062096 | ARSF               | -3.19 | 4.50E-03 |
| H3 Africa | ENSG00000174358 | SLC6A19            | -3.19 | 3.51E-04 |
| H3 Africa | ENSG00000182327 | GLTPD2             | -3.17 | 6.19E-06 |
| H3 Africa | ENSG00000277196 | LOC102724788/PRODH | -3.17 | 3.96E-02 |
| H3 Africa | ENSG00000100024 | UPB1               | -3.16 | 2.89E-06 |
| H3 Africa | ENSG00000104808 | DHDH               | -3.16 | 1.19E-03 |
| H3 Africa | ENSG00000160868 | CYP3A4             | -3.11 | 1.14E-02 |
| H3 Africa | ENSG00000182156 | ENPP7              | -3.10 | 6.57E-03 |
| H3 Africa | ENSG00000161653 | NAGS               | -3.09 | 1.52E-05 |
| H3 Africa | ENSG00000158296 | SLC13A3            | -3.09 | 2.79E-04 |
| H3 Africa | ENSG00000117601 | SERPINC1           | -3.08 | 1.53E-02 |
| H3 Africa | ENSG00000160862 | AZGP1              | -3.08 | 1.43E-05 |
| H3 Africa | ENSG00000145362 | ANK2               | -3.08 | 4.00E-04 |
| H3 Africa | ENSG00000162877 | PM20D1             | -3.08 | 3.78E-04 |
| H3 Africa | ENSG00000066230 | SLC9A3             | -3.07 | 8.47E-04 |
| H3 Africa | ENSG00000125255 | SLC10A2            | -3.04 | 1.18E-04 |
| H3 Africa | ENSG00000182271 | TMIGD1             | -3.03 | 1.64E-06 |
| H3 Africa | ENSG00000257894 | RP1_78O141         | -3.02 | 9.38E-04 |
| H3 Africa | ENSG00000118094 | TREH               | -3.02 | 5.28E-03 |
| H3 Africa | ENSG00000101445 | PPP1R16B           | -3.01 | 2.71E-04 |
| H3 Africa | ENSG00000132855 | ANGPTL3            | -3.00 | 5.56E-04 |
| H3 Africa | ENSG00000148123 | PLPPR1             | -2.97 | 4.10E-03 |
| H3 Africa | ENSG00000160282 | FTCD               | -2.95 | 4.93E-03 |
| H3 Africa | ENSG00000143627 | PKLR               | -2.95 | 7.73E-04 |
| H3 Africa | ENSG00000250436 | LINC02499          | -2.95 | 5.14E-03 |
| H3 Africa | ENSG00000183535 | COL18A1-AS1        | -2.94 | 8.22E-03 |
| H3 Africa | ENSG00000213901 | SLC23A3            | -2.94 | 1.65E-03 |
| H3 Africa | ENSG00000120645 | IQSEC3             | -2.93 | 1.06E-02 |
| H3 Africa | ENSG00000036448 | MYOM2              | -2.93 | 5.36E-05 |
| H3 Africa | ENSG00000119711 | ALDH6A1            | -2.92 | 5.20E-04 |
| H3 Africa | ENSG00000113739 | STC2               | -2.91 | 3.78E-04 |
| H3 Africa | ENSG00000140263 | SORD               | -2.89 | 2.71E-04 |
| H3 Africa | ENSG00000007216 | SLC13A2            | -2.89 | 3.80E-02 |
| H3 Africa | ENSG00000126231 | PROZ               | -2.88 | 1.24E-03 |
| H3 Africa | ENSG00000165140 | FBP1               | -2.88 | 3.03E-06 |

|           |                 |             |       |          |
|-----------|-----------------|-------------|-------|----------|
| H3 Africa | ENSG00000204653 | ASPDH       | -2.87 | 7.36E-05 |
| H3 Africa | ENSG00000156398 | SFXN2       | -2.87 | 7.61E-04 |
| H3 Africa | ENSG00000189233 | NUGGC       | -2.86 | 2.27E-03 |
| H3 Africa | ENSG00000135744 | AGT         | -2.86 | 4.27E-02 |
| H3 Africa | ENSG00000100344 | PNPLA3      | -2.85 | 2.53E-03 |
| H3 Africa | ENSG00000196549 | MME         | -2.84 | 9.03E-05 |
| H3 Africa | ENSG00000170099 | SERPINA6    | -2.84 | 6.69E-03 |
| H3 Africa | ENSG00000171759 | PAH         | -2.83 | 4.90E-06 |
| H3 Africa | ENSG00000130707 | ASS1        | -2.82 | 8.60E-07 |
| H3 Africa | ENSG00000154096 | THY1        | -2.82 | 1.97E-02 |
| H3 Africa | ENSG00000130203 | APOE        | -2.81 | 3.26E-04 |
| H3 Africa | ENSG00000119121 | TRPM6       | -2.81 | 4.03E-02 |
| H3 Africa | ENSG00000100433 | KCNK10      | -2.80 | 7.81E-03 |
| H3 Africa | ENSG00000145692 | BHMT        | -2.80 | 1.30E-05 |
| H3 Africa | ENSG00000148218 | ALAD        | -2.78 | 4.77E-05 |
| H3 Africa | ENSG00000173599 | PC          | -2.77 | 2.59E-04 |
| H3 Africa | ENSG00000198010 | DLGAP2      | -2.75 | 3.97E-02 |
| H3 Africa | ENSG00000163959 | SLC51A      | -2.75 | 5.75E-04 |
| H3 Africa | ENSG00000171234 | UGT2B7      | -2.75 | 1.32E-05 |
| H3 Africa | ENSG00000164237 | CMBL        | -2.74 | 6.74E-06 |
| H3 Africa | ENSG00000229005 | HNFB4A-AS1  | -2.73 | 2.34E-04 |
| H3 Africa | ENSG00000186529 | CYP4F3      | -2.73 | 9.00E-04 |
| H3 Africa | ENSG00000227877 | MRLN        | -2.72 | 8.94E-03 |
| H3 Africa | ENSG00000116882 | HAO2        | -2.70 | 3.32E-03 |
| H3 Africa | ENSG00000088926 | F11         | -2.69 | 8.63E-06 |
| H3 Africa | ENSG00000183044 | ABAT        | -2.66 | 1.01E-03 |
| H3 Africa | ENSG00000115255 | REEP6       | -2.66 | 5.62E-04 |
| H3 Africa | ENSG00000215231 | LINC01020   | -2.66 | 4.13E-02 |
| H3 Africa | ENSG00000092068 | SLC7A8      | -2.64 | 1.68E-02 |
| H3 Africa | ENSG00000234996 | ACTG1P25    | -2.63 | 4.03E-04 |
| H3 Africa | ENSG00000181035 | SLC25A42    | -2.63 | 5.86E-05 |
| H3 Africa | ENSG00000159640 | ACE         | -2.62 | 2.09E-02 |
| H3 Africa | ENSG00000146755 | TRIM50      | -2.62 | 2.45E-02 |
| H3 Africa | ENSG00000080709 | KCNN2       | -2.61 | 2.34E-02 |
| H3 Africa | ENSG00000183784 | DOCK8-AS1   | -2.61 | 9.98E-06 |
| H3 Africa | ENSG00000132437 | DDC         | -2.59 | 9.10E-06 |
| H3 Africa | ENSG00000149476 | TKFC        | -2.59 | 6.52E-04 |
| H3 Africa | ENSG00000196208 | GREB1       | -2.58 | 3.35E-02 |
| H3 Africa | ENSG00000197901 | SLC22A6     | -2.57 | 2.33E-05 |
| H3 Africa | ENSG00000166402 | TUB         | -2.57 | 4.38E-03 |
| H3 Africa | ENSG00000134323 | MYCN        | -2.57 | 2.71E-02 |
| H3 Africa | ENSG00000100253 | MIOX        | -2.56 | 1.24E-03 |
| H3 Africa | ENSG00000223985 | LINC01874   | -2.54 | 5.93E-03 |
| H3 Africa | ENSG00000137474 | MYO7A       | -2.53 | 1.55E-04 |
| H3 Africa | ENSG00000103316 | CRYM        | -2.53 | 4.61E-03 |
| H3 Africa | ENSG00000196177 | ACADSB      | -2.52 | 3.30E-04 |
| H3 Africa | ENSG00000164325 | TMEM174     | -2.52 | 8.47E-05 |
| H3 Africa | ENSG00000178803 | ADORA2A-AS1 | -2.51 | 1.45E-04 |
| H3 Africa | ENSG00000143819 | EPHX1       | -2.50 | 4.64E-05 |
| H3 Africa | ENSG00000099834 | CDHR5       | -2.49 | 1.34E-03 |
| H3 Africa | ENSG00000144908 | ALDH1L1     | -2.48 | 1.54E-05 |
| H3 Africa | ENSG00000164120 | HPGD        | -2.47 | 3.43E-04 |
| H3 Africa | ENSG00000165973 | NELL1       | -2.47 | 6.59E-03 |



|           |                 |                     |       |          |
|-----------|-----------------|---------------------|-------|----------|
| H3 Africa | ENSG00000008513 | ST3GAL1             | -2.46 | 1.18E-03 |
| H3 Africa | ENSG00000145832 | SLC25A48            | -2.46 | 3.18E-02 |
| H3 Africa | ENSG00000162433 | AK4                 | -2.44 | 9.00E-04 |
| H3 Africa | ENSG00000170482 | SLC23A1             | -2.44 | 5.39E-04 |
| H3 Africa | ENSG00000173826 | KCNH6               | -2.43 | 4.14E-02 |
| H3 Africa | ENSG00000143416 | SELENBP1            | -2.43 | 4.12E-04 |
| H3 Africa | ENSG00000133315 | MACROD1             | -2.43 | 1.46E-04 |
| H3 Africa | ENSG00000148584 | A1CF                | -2.43 | 5.12E-04 |
| H3 Africa | ENSG00000182836 | PLCXD3              | -2.42 | 1.67E-03 |
| H3 Africa | ENSG00000130517 | PGPEP1              | -2.42 | 5.61E-04 |
| H3 Africa | ENSG00000159423 | ALDH4A1             | -2.40 | 2.29E-04 |
| H3 Africa | ENSG00000132837 | DMGDH               | -2.39 | 1.64E-05 |
| H3 Africa | ENSG00000204444 | APOM                | -2.38 | 3.63E-04 |
| H3 Africa | ENSG00000105607 | GCDH                | -2.36 | 7.14E-04 |
| H3 Africa | ENSG00000117600 | PLPPR4              | -2.36 | 1.60E-02 |
| H3 Africa | ENSG00000167711 | SERPINF2            | -2.36 | 3.30E-02 |
| H3 Africa | ENSG00000276076 | CRYAA/LOC102724652  | -2.35 | 4.71E-02 |
| H3 Africa | ENSG00000211452 | DIO1                | -2.34 | 1.34E-03 |
| H3 Africa | ENSG00000101200 | AVP                 | -2.34 | 7.44E-04 |
| H3 Africa | ENSG00000257335 | MGAM                | -2.34 | 2.90E-02 |
| H3 Africa | ENSG00000124299 | PEPD                | -2.34 | 2.74E-05 |
| H3 Africa | ENSG00000009765 | IYD                 | -2.33 | 9.25E-04 |
| H3 Africa | ENSG00000167363 | FN3K                | -2.33 | 8.62E-05 |
| H3 Africa | ENSG00000139344 | AMDHD1              | -2.33 | 8.63E-06 |
| H3 Africa | ENSG00000142484 | TM4SF5              | -2.32 | 1.21E-03 |
| H3 Africa | ENSG00000204389 | HSPA1A/HSPA1B       | -2.32 | 2.95E-04 |
| H3 Africa | ENSG00000169738 | DCXR                | -2.32 | 1.11E-03 |
| H3 Africa | ENSG00000277117 | ICOSLG/LOC102723996 | -2.31 | 1.52E-02 |
| H3 Africa | ENSG00000129214 | SHBG                | -2.31 | 2.58E-03 |
| H3 Africa | ENSG00000079156 | OSBPL6              | -2.30 | 2.05E-02 |
| H3 Africa | ENSG00000162881 | OXER1               | -2.30 | 6.60E-03 |
| H3 Africa | ENSG00000138030 | KHK                 | -2.30 | 6.60E-05 |
| H3 Africa | ENSG00000278967 | RP5_849H193         | -2.29 | 1.04E-02 |
| H3 Africa | ENSG00000119673 | ACOT2               | -2.28 | 2.01E-04 |
| H3 Africa | ENSG00000197635 | DPP4                | -2.28 | 4.30E-03 |
| H3 Africa | ENSG00000168306 | ACOX2               | -2.28 | 1.15E-05 |
| H3 Africa | ENSG00000164283 | ESM1                | -2.28 | 6.01E-03 |
| H3 Africa | ENSG00000172940 | SLC22A13            | -2.27 | 3.15E-02 |
| H3 Africa | ENSG00000176641 | RNF152              | -2.27 | 8.51E-03 |
| H3 Africa | ENSG00000204872 | NAT8B               | -2.26 | 3.59E-02 |
| H3 Africa | ENSG00000197891 | SLC22A12            | -2.26 | 6.79E-04 |
| H3 Africa | ENSG00000113790 | EHHADH              | -2.25 | 2.61E-05 |
| H3 Africa | ENSG00000162882 | HAAO                | -2.24 | 7.51E-04 |
| H3 Africa | ENSG00000142583 | SLC2A5              | -2.23 | 2.78E-02 |
| H3 Africa | ENSG00000172955 | ADH6                | -2.23 | 3.45E-04 |
| H3 Africa | ENSG00000134207 | SYT6                | -2.23 | 4.26E-02 |
| H3 Africa | ENSG00000140284 | SLC27A2             | -2.23 | 2.99E-04 |
| H3 Africa | ENSG00000143891 | GALM                | -2.22 | 1.37E-04 |
| H3 Africa | ENSG00000134240 | HMGCS2              | -2.22 | 4.31E-02 |
| H3 Africa | ENSG00000010379 | SLC6A13             | -2.21 | 4.55E-04 |
| H3 Africa | ENSG00000115884 | SDC1                | -2.21 | 2.79E-02 |
| H3 Africa | ENSG00000182704 | TSKU                | -2.21 | 3.75E-02 |
| H3 Africa | ENSG00000176974 | SHMT1               | -2.20 | 2.47E-04 |

|           |                 |              |       |          |
|-----------|-----------------|--------------|-------|----------|
| H3 Africa | ENSG00000172497 | ACOT12       | -2.20 | 3.12E-02 |
| H3 Africa | ENSG00000137266 | SLC22A23     | -2.19 | 2.41E-03 |
| H3 Africa | ENSG00000105784 | RUNDC3B      | -2.19 | 4.52E-04 |
| H3 Africa | ENSG00000171766 | GATM         | -2.19 | 2.40E-04 |
| H3 Africa | ENSG00000137561 | TTPA         | -2.18 | 5.00E-05 |
| H3 Africa | ENSG00000180316 | PNPLA1       | -2.17 | 2.26E-02 |
| H3 Africa | ENSG00000185664 | PMEL         | -2.17 | 1.85E-03 |
| H3 Africa | ENSG00000166816 | LDHD         | -2.17 | 3.41E-04 |
| H3 Africa | ENSG00000165272 | AQP3         | -2.16 | 2.43E-02 |
| H3 Africa | ENSG00000258472 | AC005726.1   | -2.16 | 1.00E-02 |
| H3 Africa | ENSG00000166840 | GLYATL1      | -2.15 | 4.48E-03 |
| H3 Africa | ENSG00000160216 | AGPAT3       | -2.15 | 3.09E-03 |
| H3 Africa | ENSG00000116761 | CTH          | -2.14 | 4.16E-04 |
| H3 Africa | ENSG00000102032 | RENBP        | -2.14 | 1.74E-03 |
| H3 Africa | ENSG00000211445 | GPX3         | -2.13 | 2.79E-03 |
| H3 Africa | ENSG00000070808 | CAMK2A       | -2.13 | 3.77E-02 |
| H3 Africa | ENSG00000148057 | IDNK         | -2.13 | 1.05E-03 |
| H3 Africa | ENSG00000145217 | SLC26A1      | -2.13 | 1.33E-03 |
| H3 Africa | ENSG00000077514 | POLD3        | -2.12 | 1.93E-04 |
| H3 Africa | ENSG00000164855 | TMEM184A     | -2.12 | 1.67E-02 |
| H3 Africa | ENSG00000161896 | IP6K3        | -2.12 | 4.47E-02 |
| H3 Africa | ENSG00000132840 | BHMT2        | -2.11 | 2.95E-04 |
| H3 Africa | ENSG00000263535 | AK4P1        | -2.11 | 4.65E-02 |
| H3 Africa | ENSG00000279026 | RP3_414A1512 | -2.11 | 2.45E-02 |
| H3 Africa | ENSG00000092621 | PHGDH        | -2.11 | 1.71E-02 |
| H3 Africa | ENSG00000224417 | LOC105378138 | -2.11 | 1.70E-02 |
| H3 Africa | ENSG00000197852 | INKA2        | -2.10 | 9.76E-04 |
| H3 Africa | ENSG00000074276 | CDHR2        | -2.10 | 1.89E-02 |
| H3 Africa | ENSG00000128268 | MGAT3        | -2.10 | 2.68E-02 |
| H3 Africa | ENSG00000187621 | TCL6         | -2.10 | 1.63E-02 |
| H3 Africa | ENSG00000154025 | SLC5A10      | -2.09 | 1.34E-03 |
| H3 Africa | ENSG00000198763 | MT-ND2       | -2.08 | 3.48E-02 |
| H3 Africa | ENSG00000261812 | TUBB8P7      | -2.08 | 1.17E-02 |
| H3 Africa | ENSG00000172831 | CES2         | -2.08 | 1.00E-02 |
| H3 Africa | ENSG00000064655 | EYA2         | -2.07 | 1.07E-02 |
| H3 Africa | ENSG00000166123 | GPT2         | -2.07 | 1.56E-03 |
| H3 Africa | ENSG00000104419 | NDRG1        | -2.07 | 1.00E-02 |
| H3 Africa | ENSG00000109832 | DDX25        | -2.06 | 3.04E-03 |
| H3 Africa | ENSG00000275088 | RP11_442O13  | -2.06 | 1.31E-02 |
| H3 Africa | ENSG00000111424 | VDR          | -2.06 | 2.41E-02 |
| H3 Africa | ENSG00000171105 | INSR         | -2.06 | 2.25E-03 |
| H3 Africa | ENSG00000171914 | TLN2         | -2.05 | 1.34E-03 |
| H3 Africa | ENSG00000198727 | MT-CYB       | -2.05 | 1.16E-02 |
| H3 Africa | ENSG00000178462 | TUBAL3       | -2.04 | 1.23E-02 |
| H3 Africa | ENSG00000155465 | SLC7A7       | -2.04 | 4.66E-03 |
| H3 Africa | ENSG00000183048 | SLC25A10     | -2.04 | 1.01E-03 |
| H3 Africa | ENSG00000066813 | ACSM2B       | -2.03 | 4.17E-03 |
| H3 Africa | ENSG00000058404 | CAMK2B       | -2.03 | 2.20E-03 |
| H3 Africa | ENSG00000253598 | SLC10A5      | -2.03 | 5.64E-03 |
| H3 Africa | ENSG00000137274 | BPHL         | -2.02 | 2.58E-03 |
| H3 Africa | ENSG00000253574 | LOC105375781 | -2.02 | 3.52E-02 |
| H3 Africa | ENSG00000259916 | AQP7B        | -2.01 | 3.26E-02 |
| H3 Africa | ENSG00000130377 | ACSBG2       | -2.00 | 4.37E-03 |

|           |                 |                 |       |          |
|-----------|-----------------|-----------------|-------|----------|
| H3 Africa | ENSG00000133116 | KL              | -2.00 | 3.07E-03 |
| H3 Africa | ENSG00000187097 | ENTPD5          | -2.00 | 1.87E-02 |
| H3 Africa | ENSG00000163541 | SUCLG1          | -1.99 | 2.11E-05 |
| H3 Africa | ENSG00000210107 | MT-TQ           | -1.99 | 1.47E-02 |
| H3 Africa | ENSG00000163581 | SLC2A2          | -1.99 | 6.13E-03 |
| H3 Africa | ENSG00000113389 | NPR3            | -1.99 | 3.18E-03 |
| H3 Africa | ENSG00000097021 | ACOT7           | -1.98 | 1.21E-03 |
| H3 Africa | ENSG00000076258 | FMO4            | -1.98 | 6.49E-03 |
| H3 Africa | ENSG00000055163 | CYFIP2          | -1.98 | 2.47E-03 |
| H3 Africa | ENSG00000146411 | SLC2A12         | -1.98 | 1.06E-03 |
| H3 Africa | ENSG00000128165 | ADM2            | -1.97 | 5.73E-03 |
| H3 Africa | ENSG00000107295 | SH3GL2          | -1.97 | 1.40E-02 |
| H3 Africa | ENSG00000132744 | ACY3            | -1.97 | 1.00E-02 |
| H3 Africa | ENSG00000102109 | PCSK1N          | -1.97 | 1.52E-03 |
| H3 Africa | ENSG00000124214 | STAU1           | -1.96 | 6.15E-04 |
| H3 Africa | ENSG00000124588 | NQO2            | -1.96 | 1.03E-03 |
| H3 Africa | ENSG00000133401 | PDZD2           | -1.96 | 5.18E-03 |
| H3 Africa | ENSG00000186350 | RXRA            | -1.96 | 1.45E-03 |
| H3 Africa | ENSG00000172828 | CES3            | -1.96 | 2.75E-03 |
| H3 Africa | ENSG00000107611 | CUBN            | -1.95 | 2.47E-02 |
| H3 Africa | ENSG00000147872 | PLIN2           | -1.95 | 1.86E-02 |
| H3 Africa | ENSG00000169116 | PARM1           | -1.94 | 1.11E-02 |
| H3 Africa | ENSG00000143845 | ETNK2           | -1.94 | 8.03E-03 |
| H3 Africa | ENSG00000185100 | ADSS1           | -1.94 | 2.84E-02 |
| H3 Africa | ENSG00000237437 | ASS1P12         | -1.94 | 1.62E-04 |
| H3 Africa | ENSG00000148357 | HMCN2           | -1.94 | 3.73E-02 |
| H3 Africa | ENSG00000152782 | PANK1           | -1.94 | 5.92E-04 |
| H3 Africa | ENSG00000233381 | AK4P3           | -1.94 | 6.43E-04 |
| H3 Africa | ENSG00000203995 | ZYG11A          | -1.93 | 1.08E-02 |
| H3 Africa | ENSG00000163050 | COQ8A           | -1.93 | 3.23E-04 |
| H3 Africa | ENSG00000116005 | PCYOX1          | -1.93 | 1.21E-03 |
| H3 Africa | ENSG00000083444 | PLOD1           | -1.93 | 3.96E-04 |
| H3 Africa | ENSG00000072682 | P4HA2           | -1.93 | 3.72E-02 |
| H3 Africa | ENSG00000230778 | ANKRD63         | -1.93 | 2.13E-02 |
| H3 Africa | ENSG00000127884 | ECHS1           | -1.93 | 4.17E-04 |
| H3 Africa | ENSG00000180155 | LYNX1           | -1.92 | 3.99E-02 |
| H3 Africa | ENSG00000175600 | SUGCT           | -1.92 | 4.79E-04 |
| H3 Africa | ENSG00000117791 | MTARC2          | -1.92 | 1.04E-02 |
| H3 Africa | ENSG00000178821 | TMEM52          | -1.92 | 1.00E-03 |
| H3 Africa | ENSG00000091262 | ABCC6           | -1.91 | 2.58E-02 |
| H3 Africa | ENSG00000131400 | NAPSA           | -1.91 | 1.71E-02 |
| H3 Africa | ENSG00000138413 | IDH1            | -1.91 | 5.47E-04 |
| H3 Africa | ENSG00000042445 | RETSAT          | -1.90 | 6.83E-03 |
| H3 Africa | ENSG00000214796 | TUBA5P          | -1.90 | 1.62E-02 |
| H3 Africa | ENSG00000157322 | CLEC18A/CLEC18C | -1.90 | 1.23E-02 |
| H3 Africa | ENSG00000112964 | GHR             | -1.89 | 8.85E-04 |
| H3 Africa | ENSG00000164406 | LEAP2           | -1.89 | 4.51E-02 |
| H3 Africa | ENSG00000023839 | ABCC2           | -1.89 | 2.19E-04 |
| H3 Africa | ENSG00000142661 | MYOM3           | -1.89 | 1.25E-02 |
| H3 Africa | ENSG00000135476 | ESPL1           | -1.89 | 1.11E-02 |
| H3 Africa | ENSG00000075234 | TTC38           | -1.89 | 2.32E-02 |
| H3 Africa | ENSG00000166831 | BPMS2           | -1.89 | 1.00E-02 |
| H3 Africa | ENSG00000176383 | B3GNT4          | -1.89 | 3.36E-02 |

|           |                 |            |       |          |
|-----------|-----------------|------------|-------|----------|
| H3 Africa | ENSG00000110092 | CCND1      | -1.89 | 1.65E-02 |
| H3 Africa | ENSG00000133065 | SLC41A1    | -1.88 | 8.19E-03 |
| H3 Africa | ENSG00000143195 | ILDR2      | -1.88 | 1.06E-02 |
| H3 Africa | ENSG00000113494 | PRLR       | -1.87 | 1.85E-02 |
| H3 Africa | ENSG00000108381 | ASPA       | -1.87 | 8.01E-04 |
| H3 Africa | ENSG00000060971 | ACAA1      | -1.87 | 4.44E-03 |
| H3 Africa | ENSG00000177706 | FAM20C     | -1.86 | 1.61E-03 |
| H3 Africa | ENSG00000082397 | EPB41L3    | -1.86 | 1.20E-03 |
| H3 Africa | ENSG00000158014 | SLC30A2    | -1.86 | 4.30E-02 |
| H3 Africa | ENSG00000093217 | XYLB       | -1.86 | 3.87E-03 |
| H3 Africa | ENSG00000248923 | MTND5P11   | -1.85 | 9.83E-03 |
| H3 Africa | ENSG00000112394 | SLC16A10   | -1.85 | 4.96E-03 |
| H3 Africa | ENSG00000072210 | ALDH3A2    | -1.85 | 9.00E-04 |
| H3 Africa | ENSG00000156222 | SLC28A1    | -1.84 | 9.09E-03 |
| H3 Africa | ENSG00000112294 | ALDH5A1    | -1.84 | 2.69E-02 |
| H3 Africa | ENSG00000094631 | HDAC6      | -1.84 | 2.89E-04 |
| H3 Africa | ENSG00000124374 | PAIP2B     | -1.84 | 4.45E-02 |
| H3 Africa | ENSG00000110628 | SLC22A18   | -1.84 | 1.28E-02 |
| H3 Africa | ENSG00000107902 | LHPP       | -1.83 | 1.37E-02 |
| H3 Africa | ENSG00000182551 | ADI1       | -1.83 | 8.11E-04 |
| H3 Africa | ENSG00000139194 | RBP5       | -1.83 | 7.75E-03 |
| H3 Africa | ENSG00000222019 | URAHP      | -1.83 | 2.03E-02 |
| H3 Africa | ENSG00000117266 | CDK18      | -1.82 | 1.06E-03 |
| H3 Africa | ENSG00000101400 | SNTA1      | -1.82 | 8.88E-03 |
| H3 Africa | ENSG00000273032 | DGCR5      | -1.82 | 2.35E-02 |
| H3 Africa | ENSG00000144847 | IGSF11     | -1.82 | 2.04E-02 |
| H3 Africa | ENSG00000108479 | GALK1      | -1.82 | 1.66E-02 |
| H3 Africa | ENSG00000161091 | MFSD12     | -1.82 | 7.43E-03 |
| H3 Africa | ENSG00000171867 | PRNP       | -1.82 | 1.20E-03 |
| H3 Africa | ENSG00000135108 | FBXO21     | -1.82 | 4.93E-03 |
| H3 Africa | ENSG00000156535 | CD109      | -1.81 | 3.08E-02 |
| H3 Africa | ENSG00000164733 | CTSB       | -1.81 | 1.19E-02 |
| H3 Africa | ENSG00000214553 | LRRC37A11P | -1.81 | 2.62E-02 |
| H3 Africa | ENSG00000160801 | PTH1R      | -1.81 | 8.61E-03 |
| H3 Africa | ENSG00000168003 | SLC3A2     | -1.81 | 2.94E-02 |
| H3 Africa | ENSG00000009950 | MLXIPL     | -1.81 | 1.65E-02 |
| H3 Africa | ENSG00000157379 | DHRS1      | -1.81 | 3.83E-04 |
| H3 Africa | ENSG00000144035 | NAT8       | -1.80 | 1.53E-03 |
| H3 Africa | ENSG00000261308 | FIGNL2     | -1.80 | 2.30E-02 |
| H3 Africa | ENSG00000167107 | ACSF2      | -1.79 | 1.15E-03 |
| H3 Africa | ENSG00000163328 | GPR155     | -1.79 | 1.57E-02 |
| H3 Africa | ENSG00000069702 | TGFBR3     | -1.79 | 4.35E-03 |
| H3 Africa | ENSG00000183549 | ACSM5      | -1.78 | 3.16E-02 |
| H3 Africa | ENSG00000184988 | TMEM106A   | -1.78 | 8.19E-03 |
| H3 Africa | ENSG00000148842 | CNNM2      | -1.78 | 4.17E-03 |
| H3 Africa | ENSG00000165376 | CLDN2      | -1.77 | 2.88E-02 |
| H3 Africa | ENSG00000164530 | PI16       | -1.77 | 2.03E-02 |
| H3 Africa | ENSG00000163884 | KLF15      | -1.77 | 2.36E-02 |
| H3 Africa | ENSG00000178828 | RNF186     | -1.77 | 3.29E-02 |
| H3 Africa | ENSG00000186198 | SLC51B     | -1.77 | 1.35E-02 |
| H3 Africa | ENSG00000267666 | AC0041563  | -1.77 | 6.94E-03 |
| H3 Africa | ENSG00000172159 | FRMD3      | -1.76 | 9.46E-03 |
| H3 Africa | ENSG00000162989 | KCNJ3      | -1.76 | 1.33E-02 |

|           |                 |              |       |          |
|-----------|-----------------|--------------|-------|----------|
| H3 Africa | ENSG00000130234 | ACE2         | -1.76 | 4.05E-02 |
| H3 Africa | ENSG00000173848 | NET1         | -1.75 | 3.54E-03 |
| H3 Africa | ENSG00000162496 | DHRS3        | -1.74 | 3.96E-03 |
| H3 Africa | ENSG00000215256 | DHRS4-AS1    | -1.74 | 6.61E-03 |
| H3 Africa | ENSG00000205683 | DPF3         | -1.74 | 1.39E-02 |
| H3 Africa | ENSG00000063854 | HAGH         | -1.74 | 2.44E-03 |
| H3 Africa | ENSG00000143412 | ANXA9        | -1.73 | 4.85E-02 |
| H3 Africa | ENSG00000147003 | CLTRN        | -1.73 | 1.67E-02 |
| H3 Africa | ENSG00000166126 | AMN          | -1.73 | 6.49E-03 |
| H3 Africa | ENSG00000151240 | DIP2C        | -1.73 | 2.66E-03 |
| H3 Africa | ENSG00000182749 | PAQR7        | -1.72 | 7.25E-03 |
| H3 Africa | ENSG00000095932 | SMIM24       | -1.72 | 9.75E-04 |
| H3 Africa | ENSG00000183762 | KREMEN1      | -1.71 | 3.61E-02 |
| H3 Africa | ENSG00000137563 | GGH          | -1.71 | 1.79E-02 |
| H3 Africa | ENSG00000137106 | GRHPR        | -1.71 | 8.92E-03 |
| H3 Africa | ENSG00000177465 | ACOT4        | -1.71 | 1.39E-02 |
| H3 Africa | ENSG00000257093 | DENND11      | -1.70 | 1.33E-02 |
| H3 Africa | ENSG00000102048 | ASB9         | -1.70 | 2.79E-02 |
| H3 Africa | ENSG00000099864 | PALM         | -1.70 | 2.42E-02 |
| H3 Africa | ENSG00000198130 | HIBCH        | -1.70 | 4.14E-02 |
| H3 Africa | ENSG00000241119 | UGT1A9       | -1.70 | 4.67E-02 |
| H3 Africa | ENSG00000095539 | SEMA4G       | -1.69 | 1.96E-02 |
| H3 Africa | ENSG00000162460 | TMEM82       | -1.69 | 1.52E-02 |
| H3 Africa | ENSG00000088899 | LZTS3        | -1.69 | 2.06E-02 |
| H3 Africa | ENSG00000220517 | ASS1P1       | -1.69 | 6.03E-03 |
| H3 Africa | ENSG00000259319 | JDP2-AS1     | -1.69 | 2.67E-02 |
| H3 Africa | ENSG00000225075 | RP11_426L163 | -1.69 | 5.80E-03 |
| H3 Africa | ENSG00000122203 | KIAA1191     | -1.68 | 3.82E-02 |
| H3 Africa | ENSG00000254211 | LINC01485    | -1.68 | 2.48E-02 |
| H3 Africa | ENSG00000157823 | AP3S2        | -1.68 | 2.26E-02 |
| H3 Africa | ENSG00000248211 | TRPC7-AS1    | -1.68 | 7.46E-03 |
| H3 Africa | ENSG00000165868 | HSPA12A      | -1.68 | 1.18E-02 |
| H3 Africa | ENSG00000227244 | LINC00845    | -1.67 | 1.31E-02 |
| H3 Africa | ENSG00000231690 | LINC00574    | -1.67 | 2.11E-02 |
| H3 Africa | ENSG00000100307 | CBX7         | -1.67 | 1.29E-02 |
| H3 Africa | ENSG00000010932 | FMO1         | -1.66 | 2.68E-02 |
| H3 Africa | ENSG00000264589 | MAPT-AS1     | -1.66 | 3.87E-02 |
| H3 Africa | ENSG00000172840 | PDP2         | -1.65 | 2.55E-03 |
| H3 Africa | ENSG00000183747 | ACSM2A       | -1.65 | 1.01E-03 |
| H3 Africa | ENSG00000236893 | ASS1P7       | -1.65 | 2.22E-03 |
| H3 Africa | ENSG00000131979 | GCH1         | -1.65 | 4.36E-02 |
| H3 Africa | ENSG00000136960 | ENPP2        | -1.64 | 8.55E-03 |
| H3 Africa | ENSG00000255746 | LOC102723544 | -1.63 | 5.02E-03 |
| H3 Africa | ENSG00000250244 | CTB_49A34    | -1.63 | 2.60E-02 |
| H3 Africa | ENSG00000248319 | LINC02275    | -1.62 | 2.46E-02 |
| H3 Africa | ENSG00000140199 | SLC12A6      | -1.62 | 7.82E-03 |
| H3 Africa | ENSG00000149328 | GLB1L2       | -1.62 | 2.23E-02 |
| H3 Africa | ENSG00000240875 | LINC00886    | -1.62 | 4.53E-02 |
| H3 Africa | ENSG00000127418 | FGFRL1       | -1.62 | 1.64E-02 |
| H3 Africa | ENSG00000148672 | GLUD1        | -1.61 | 1.23E-02 |
| H3 Africa | ENSG00000238099 | LINC01625    | -1.61 | 2.43E-02 |
| H3 Africa | ENSG00000134463 | ECHDC3       | -1.61 | 2.52E-02 |
| H3 Africa | ENSG00000128311 | TST          | -1.60 | 1.61E-02 |

|           |                 |              |       |          |
|-----------|-----------------|--------------|-------|----------|
| H3 Africa | ENSG00000169504 | CLIC4        | -1.60 | 1.28E-02 |
| H3 Africa | ENSG00000104635 | SLC39A14     | -1.59 | 4.02E-02 |
| H3 Africa | ENSG00000087299 | L2HGDH       | -1.59 | 1.30E-02 |
| H3 Africa | ENSG00000102543 | CDADC1       | -1.58 | 2.82E-02 |
| H3 Africa | ENSG00000205832 | C16orf96     | -1.58 | 3.71E-03 |
| H3 Africa | ENSG00000104154 | SLC30A4      | -1.58 | 2.12E-02 |
| H3 Africa | ENSG00000249948 | GBA3         | -1.57 | 4.40E-02 |
| H3 Africa | ENSG00000178573 | MAF          | -1.57 | 2.68E-02 |
| H3 Africa | ENSG00000229639 | LINC01758    | -1.57 | 3.43E-02 |
| H3 Africa | ENSG00000266036 | SLC9A3R1-AS1 | -1.56 | 4.02E-02 |
| H3 Africa | ENSG00000105227 | PRX          | -1.56 | 4.19E-02 |
| H3 Africa | ENSG00000035115 | SH3YL1       | -1.56 | 1.32E-02 |
| H3 Africa | ENSG00000235314 | LINC00957    | -1.55 | 1.15E-02 |
| H3 Africa | ENSG00000271824 | SMIM32       | -1.55 | 4.87E-02 |
| H3 Africa | ENSG00000250722 | SELENOP      | -1.55 | 4.56E-02 |
| H3 Africa | ENSG00000242474 | AC0936279    | -1.54 | 3.72E-02 |
| H3 Africa | ENSG00000108176 | DNAJC12      | -1.54 | 3.08E-02 |
| H3 Africa | ENSG00000196408 | NOXO1        | -1.53 | 4.63E-02 |
| H3 Africa | ENSG00000240915 | RP11_659E92  | -1.53 | 3.58E-02 |
| H3 Africa | ENSG00000157637 | SLC38A10     | -1.53 | 1.54E-02 |
| H3 Africa | ENSG00000185187 | SIGIRR       | -1.52 | 2.84E-02 |
| H3 Africa | ENSG00000126522 | ASL          | -1.51 | 2.10E-02 |
| H3 Africa | ENSG00000113273 | ARSB         | -1.50 | 4.57E-02 |
| H3 Africa | ENSG00000123427 | EEF1AKMT3    | -1.50 | 3.99E-02 |
| H3 Africa | ENSG00000176563 | CNTD1        | 1.50  | 3.51E-02 |
| H3 Africa | ENSG00000197275 | RAD54B       | 1.50  | 2.09E-02 |
| H3 Africa | ENSG00000169760 | NLGN1        | 1.50  | 3.59E-02 |
| H3 Africa | ENSG00000120327 | PCDHB14      | 1.51  | 4.82E-02 |
| H3 Africa | ENSG00000048140 | TSPAN17      | 1.51  | 1.53E-02 |
| H3 Africa | ENSG00000274290 | H2BC6        | 1.51  | 3.37E-02 |
| H3 Africa | ENSG00000204650 | LINC02210    | 1.51  | 2.89E-02 |
| H3 Africa | ENSG00000134460 | IL2RA        | 1.51  | 4.75E-02 |
| H3 Africa | ENSG00000136870 | ZNF189       | 1.51  | 2.37E-02 |
| H3 Africa | ENSG00000124574 | ABCC10       | 1.51  | 1.42E-02 |
| H3 Africa | ENSG00000196230 | TUBB         | 1.51  | 2.02E-02 |
| H3 Africa | ENSG00000152348 | ATG10        | 1.52  | 1.43E-02 |
| H3 Africa | ENSG00000143633 | C1orf131     | 1.52  | 3.61E-02 |
| H3 Africa | ENSG00000243964 | RPL23AP65    | 1.52  | 2.93E-02 |
| H3 Africa | ENSG00000135931 | ARMC9        | 1.52  | 1.31E-02 |
| H3 Africa | ENSG00000112029 | FBXO5        | 1.52  | 9.62E-03 |
| H3 Africa | ENSG00000229852 | KHDC1-AS1    | 1.52  | 2.94E-02 |
| H3 Africa | ENSG00000259674 | RP11_356M201 | 1.52  | 1.35E-02 |
| H3 Africa | ENSG00000084774 | CAD          | 1.52  | 1.55E-02 |
| H3 Africa | ENSG00000259448 | LINC02352    | 1.52  | 3.29E-02 |
| H3 Africa | ENSG00000198939 | ZFP2         | 1.52  | 1.62E-02 |
| H3 Africa | ENSG00000231074 | HCG18        | 1.52  | 2.29E-02 |
| H3 Africa | ENSG00000153558 | FBXL2        | 1.53  | 3.15E-02 |
| H3 Africa | ENSG00000175352 | NRIP3        | 1.53  | 1.91E-02 |
| H3 Africa | ENSG00000133121 | STARD13      | 1.53  | 1.85E-02 |
| H3 Africa | ENSG00000197381 | ADARB1       | 1.53  | 2.51E-02 |
| H3 Africa | ENSG00000152778 | IFIT5        | 1.53  | 2.12E-02 |
| H3 Africa | ENSG00000161298 | ZNF382       | 1.53  | 1.79E-02 |
| H3 Africa | ENSG00000278879 | AP0005603    | 1.53  | 2.89E-02 |

|           |                 |              |      |          |
|-----------|-----------------|--------------|------|----------|
| H3 Africa | ENSG00000106683 | LIMK1        | 1.53 | 4.41E-02 |
| H3 Africa | ENSG00000233850 | AC1035638    | 1.53 | 2.40E-02 |
| H3 Africa | ENSG00000164342 | TLR3         | 1.53 | 2.89E-02 |
| H3 Africa | ENSG00000108511 | HOXB6        | 1.53 | 4.35E-02 |
| H3 Africa | ENSG00000177595 | PIDD1        | 1.53 | 4.20E-02 |
| H3 Africa | ENSG00000180773 | SLC36A4      | 1.54 | 1.73E-02 |
| H3 Africa | ENSG00000169946 | ZFPM2        | 1.54 | 4.27E-02 |
| H3 Africa | ENSG00000162069 | BICDL2       | 1.54 | 4.16E-02 |
| H3 Africa | ENSG00000151655 | ITIH2        | 1.54 | 4.55E-02 |
| H3 Africa | ENSG00000240463 | RPS19P3      | 1.54 | 4.52E-02 |
| H3 Africa | ENSG00000143537 | ADAM15       | 1.54 | 3.04E-02 |
| H3 Africa | ENSG00000091106 | NLRC4        | 1.54 | 1.91E-02 |
| H3 Africa | ENSG00000203326 | ZNF525       | 1.54 | 1.64E-02 |
| H3 Africa | ENSG00000005801 | ZNF195       | 1.55 | 2.44E-02 |
| H3 Africa | ENSG00000146001 | PCDHB18P     | 1.55 | 4.73E-02 |
| H3 Africa | ENSG00000144136 | SLC20A1      | 1.55 | 2.63E-02 |
| H3 Africa | ENSG00000184307 | ZDHHC23      | 1.55 | 2.41E-02 |
| H3 Africa | ENSG00000105963 | ADAP1        | 1.55 | 1.43E-02 |
| H3 Africa | ENSG00000152359 | POC5         | 1.55 | 7.81E-03 |
| H3 Africa | ENSG00000196110 | ZNF699       | 1.55 | 3.85E-03 |
| H3 Africa | ENSG00000183808 | RBM12B       | 1.55 | 6.23E-03 |
| H3 Africa | ENSG00000078900 | TP73         | 1.55 | 3.46E-02 |
| H3 Africa | ENSG00000187164 | SHTN1        | 1.55 | 4.75E-03 |
| H3 Africa | ENSG00000179862 | CITED4       | 1.56 | 2.79E-02 |
| H3 Africa | ENSG00000196083 | IL1RAP       | 1.56 | 1.12E-02 |
| H3 Africa | ENSG00000183734 | ASCL2        | 1.56 | 4.95E-03 |
| H3 Africa | ENSG00000129317 | PUS7L        | 1.56 | 3.99E-02 |
| H3 Africa | ENSG00000197937 | ZNF347       | 1.56 | 4.01E-02 |
| H3 Africa | ENSG00000110057 | UNC93B1      | 1.56 | 1.53E-02 |
| H3 Africa | ENSG00000280206 | CTB_193M125  | 1.56 | 1.14E-02 |
| H3 Africa | ENSG00000275180 | RP11_631N164 | 1.56 | 3.82E-02 |
| H3 Africa | ENSG00000180198 | RCC1         | 1.56 | 1.90E-02 |
| H3 Africa | ENSG00000205517 | RGL3         | 1.56 | 4.09E-02 |
| H3 Africa | ENSG00000251369 | ZNF550       | 1.56 | 1.70E-02 |
| H3 Africa | ENSG00000184164 | CRELD2       | 1.56 | 1.53E-02 |
| H3 Africa | ENSG00000164574 | GALNT10      | 1.56 | 4.27E-02 |
| H3 Africa | ENSG00000089351 | GRAMD1A      | 1.56 | 3.40E-03 |
| H3 Africa | ENSG00000182636 | NDN          | 1.56 | 4.13E-02 |
| H3 Africa | ENSG00000071575 | TRIB2        | 1.56 | 3.25E-02 |
| H3 Africa | ENSG00000125735 | TNFSF14      | 1.56 | 4.58E-03 |
| H3 Africa | ENSG00000021355 | SERPINB1     | 1.57 | 4.70E-03 |
| H3 Africa | ENSG00000094975 | SUCO         | 1.57 | 4.03E-03 |
| H3 Africa | ENSG00000153214 | TMEM87B      | 1.57 | 3.69E-03 |
| H3 Africa | ENSG00000163513 | TGFBR2       | 1.57 | 2.01E-02 |
| H3 Africa | ENSG00000136160 | EDNRB        | 1.57 | 3.82E-02 |
| H3 Africa | ENSG00000006025 | OSBPL7       | 1.57 | 2.07E-02 |
| H3 Africa | ENSG00000175768 | TOMM5        | 1.57 | 2.40E-02 |
| H3 Africa | ENSG00000033178 | UBA6         | 1.57 | 3.35E-03 |
| H3 Africa | ENSG00000112773 | TENT5A       | 1.57 | 4.22E-03 |
| H3 Africa | ENSG00000087589 | CASS4        | 1.57 | 3.32E-02 |
| H3 Africa | ENSG00000197121 | PGAP1        | 1.57 | 4.02E-02 |
| H3 Africa | ENSG00000205155 | PSENE1       | 1.57 | 9.77E-03 |
| H3 Africa | ENSG00000165816 | VWA2         | 1.57 | 3.99E-02 |

|           |                 |               |      |          |
|-----------|-----------------|---------------|------|----------|
| H3 Africa | ENSG00000095794 | CREM          | 1.57 | 1.83E-02 |
| H3 Africa | ENSG00000277151 | RP11_380B43   | 1.57 | 2.01E-02 |
| H3 Africa | ENSG00000204920 | ZNF155        | 1.57 | 1.40E-02 |
| H3 Africa | ENSG00000116871 | MAP7D1        | 1.57 | 1.71E-02 |
| H3 Africa | ENSG00000133067 | LGR6          | 1.57 | 8.19E-03 |
| H3 Africa | ENSG00000231889 | TRAF3IP2-AS1  | 1.57 | 2.15E-02 |
| H3 Africa | ENSG00000140057 | AK7           | 1.58 | 2.81E-02 |
| H3 Africa | ENSG00000177602 | HASPIN        | 1.58 | 1.34E-02 |
| H3 Africa | ENSG00000172830 | SSH3          | 1.58 | 5.55E-03 |
| H3 Africa | ENSG00000115084 | SLC35F5       | 1.58 | 3.45E-03 |
| H3 Africa | ENSG00000114529 | C3orf52       | 1.58 | 3.70E-02 |
| H3 Africa | ENSG00000256269 | HMBS          | 1.58 | 2.26E-02 |
| H3 Africa | ENSG00000087088 | BAX           | 1.58 | 1.67E-02 |
| H3 Africa | ENSG00000166130 | IKBIP         | 1.58 | 3.58E-02 |
| H3 Africa | ENSG00000267534 | S1PR2         | 1.58 | 4.42E-02 |
| H3 Africa | ENSG00000154914 | USP43         | 1.58 | 1.58E-02 |
| H3 Africa | ENSG00000160051 | IQCC          | 1.58 | 7.01E-03 |
| H3 Africa | ENSG00000267508 | ZNF285        | 1.58 | 1.32E-02 |
| H3 Africa | ENSG00000130224 | LRCH2         | 1.58 | 1.47E-02 |
| H3 Africa | ENSG00000068796 | KIF2A         | 1.59 | 2.87E-02 |
| H3 Africa | ENSG00000039650 | PNKP          | 1.59 | 1.96E-02 |
| H3 Africa | ENSG00000198856 | OSTC          | 1.59 | 4.39E-03 |
| H3 Africa | ENSG00000173653 | RCE1          | 1.59 | 4.15E-03 |
| H3 Africa | ENSG00000272763 | RP11_357H1417 | 1.59 | 4.07E-02 |
| H3 Africa | ENSG00000164056 | SPRY1         | 1.59 | 2.35E-02 |
| H3 Africa | ENSG00000163162 | RNF149        | 1.59 | 8.28E-04 |
| H3 Africa | ENSG00000171357 | LURAP1        | 1.59 | 1.72E-02 |
| H3 Africa | ENSG00000164114 | MAP9          | 1.59 | 1.30E-02 |
| H3 Africa | ENSG00000123352 | SPATS2        | 1.59 | 1.06E-02 |
| H3 Africa | ENSG00000184731 | FAM110C       | 1.59 | 2.06E-02 |
| H3 Africa | ENSG00000221829 | FANCG         | 1.59 | 2.74E-02 |
| H3 Africa | ENSG00000157483 | MYO1E         | 1.59 | 2.41E-02 |
| H3 Africa | ENSG00000171044 | XKR6          | 1.59 | 4.85E-02 |
| H3 Africa | ENSG00000138190 | EXOC6         | 1.60 | 1.69E-03 |
| H3 Africa | ENSG00000033170 | FUT8          | 1.60 | 2.89E-02 |
| H3 Africa | ENSG00000153885 | KCTD15        | 1.60 | 4.76E-02 |
| H3 Africa | ENSG00000135185 | TMEM243       | 1.60 | 1.58E-02 |
| H3 Africa | ENSG00000047648 | ARHGAP6       | 1.60 | 7.06E-03 |
| H3 Africa | ENSG00000104312 | RIPK2         | 1.60 | 3.52E-03 |
| H3 Africa | ENSG00000126947 | ARMCX1        | 1.60 | 1.39E-02 |
| H3 Africa | ENSG00000213801 | ZNF321P       | 1.60 | 7.08E-03 |
| H3 Africa | ENSG00000082269 | FAM135A       | 1.60 | 2.82E-03 |
| H3 Africa | ENSG00000185480 | PARPBP        | 1.60 | 4.90E-02 |
| H3 Africa | ENSG00000182185 | RAD51B        | 1.60 | 2.41E-02 |
| H3 Africa | ENSG00000256235 | SMIM3         | 1.60 | 8.38E-03 |
| H3 Africa | ENSG00000148841 | ITPRIP        | 1.60 | 2.41E-02 |
| H3 Africa | ENSG00000244649 | LINC02086     | 1.60 | 4.02E-02 |
| H3 Africa | ENSG00000196267 | ZNF836        | 1.60 | 1.44E-02 |
| H3 Africa | ENSG00000103966 | EHD4          | 1.60 | 3.88E-02 |
| H3 Africa | ENSG00000253159 | PCDHGA12      | 1.60 | 3.79E-02 |
| H3 Africa | ENSG00000160193 | WDR4          | 1.60 | 5.21E-03 |
| H3 Africa | ENSG00000269001 | CTD-2245F17.3 | 1.60 | 3.63E-02 |
| H3 Africa | ENSG00000128656 | CHN1          | 1.61 | 3.72E-02 |



|           |                 |                        |      |          |
|-----------|-----------------|------------------------|------|----------|
| H3 Africa | ENSG00000079101 | CLUL1                  | 1.61 | 4.95E-02 |
| H3 Africa | ENSG00000168005 | SPINDOC                | 1.61 | 1.85E-02 |
| H3 Africa | ENSG00000136783 | NIPSNAP3A              | 1.61 | 1.27E-02 |
| H3 Africa | ENSG00000123870 | ZNF137P                | 1.61 | 1.84E-02 |
| H3 Africa | ENSG00000106077 | ABHD11                 | 1.61 | 5.75E-03 |
| H3 Africa | ENSG00000088035 | ALG6                   | 1.61 | 7.06E-03 |
| H3 Africa | ENSG00000080200 | CRYBG3                 | 1.61 | 1.66E-02 |
| H3 Africa | ENSG00000158186 | MRAS                   | 1.61 | 4.85E-02 |
| H3 Africa | ENSG00000177694 | NAALADL2               | 1.61 | 3.30E-02 |
| H3 Africa | ENSG00000128284 | APOL3                  | 1.61 | 2.89E-02 |
| H3 Africa | ENSG00000120334 | CENPL                  | 1.61 | 1.42E-02 |
| H3 Africa | ENSG00000276141 | WHAMMP3                | 1.61 | 4.59E-02 |
| H3 Africa | ENSG00000099385 | BCL7C                  | 1.61 | 4.51E-02 |
| H3 Africa | ENSG00000182742 | HOXB4                  | 1.61 | 2.09E-02 |
| H3 Africa | ENSG00000170954 | ZNF415                 | 1.61 | 3.89E-02 |
| H3 Africa | ENSG00000243554 | AC0049677              | 1.61 | 1.87E-02 |
| H3 Africa | ENSG00000118242 | MREG                   | 1.61 | 1.67E-02 |
| H3 Africa | ENSG00000214029 | ZNF891                 | 1.61 | 4.13E-02 |
| H3 Africa | ENSG00000254996 | ANKHD1/ANKHD1-EIF4EBP3 | 1.61 | 1.14E-02 |
| H3 Africa | ENSG00000175643 | RMI2                   | 1.61 | 2.22E-02 |
| H3 Africa | ENSG00000187808 | SOWAHD                 | 1.61 | 5.92E-04 |
| H3 Africa | ENSG00000146904 | EPHA1                  | 1.61 | 2.80E-02 |
| H3 Africa | ENSG00000100906 | NFKBIA                 | 1.61 | 5.48E-03 |
| H3 Africa | ENSG00000137185 | ZSCAN9                 | 1.61 | 4.82E-03 |
| H3 Africa | ENSG00000163638 | ADAMTS9                | 1.62 | 6.83E-03 |
| H3 Africa | ENSG00000164136 | IL15                   | 1.62 | 2.38E-02 |
| H3 Africa | ENSG00000139083 | ETV6                   | 1.62 | 1.77E-02 |
| H3 Africa | ENSG00000154642 | C21orf91               | 1.62 | 2.10E-03 |
| H3 Africa | ENSG00000135835 | KIAA1614               | 1.62 | 3.43E-02 |
| H3 Africa | ENSG00000173166 | RAPH1                  | 1.62 | 1.61E-02 |
| H3 Africa | ENSG00000224397 | PELATON                | 1.62 | 1.96E-02 |
| H3 Africa | ENSG00000114268 | PFKFB4                 | 1.62 | 7.41E-03 |
| H3 Africa | ENSG00000153250 | RBMS1                  | 1.62 | 1.57E-03 |
| H3 Africa | ENSG00000213793 | ZNF888                 | 1.62 | 2.54E-02 |
| H3 Africa | ENSG00000069849 | ATP1B3                 | 1.62 | 5.98E-03 |
| H3 Africa | ENSG00000203668 | CHML                   | 1.62 | 1.44E-02 |
| H3 Africa | ENSG00000068745 | IP6K2                  | 1.62 | 2.07E-02 |
| H3 Africa | ENSG00000102038 | SMARCA1                | 1.62 | 2.66E-03 |
| H3 Africa | ENSG00000015285 | WAS                    | 1.62 | 3.59E-02 |
| H3 Africa | ENSG00000135338 | LCA5                   | 1.62 | 1.70E-02 |
| H3 Africa | ENSG00000133739 | LRRCC1                 | 1.62 | 5.15E-03 |
| H3 Africa | ENSG00000157388 | CACNA1D                | 1.62 | 4.94E-03 |
| H3 Africa | ENSG00000162618 | ADGRL4                 | 1.62 | 1.91E-02 |
| H3 Africa | ENSG00000123684 | LPGAT1                 | 1.62 | 1.11E-02 |
| H3 Africa | ENSG00000038382 | TRIO                   | 1.62 | 3.64E-03 |
| H3 Africa | ENSG00000213976 | CTD_2561J222           | 1.63 | 9.83E-03 |
| H3 Africa | ENSG00000188643 | S100A16                | 1.63 | 8.97E-03 |
| H3 Africa | ENSG00000118507 | AKAP7                  | 1.63 | 4.57E-03 |
| H3 Africa | ENSG00000166979 | EVA1C                  | 1.63 | 1.39E-02 |
| H3 Africa | ENSG00000136114 | THSD1                  | 1.63 | 4.27E-02 |
| H3 Africa | ENSG00000267283 | AC0053063              | 1.63 | 3.73E-02 |
| H3 Africa | ENSG00000153132 | CLGN                   | 1.63 | 2.51E-03 |
| H3 Africa | ENSG00000197093 | GAL3ST4                | 1.63 | 1.27E-02 |

|           |                 |                          |      |          |
|-----------|-----------------|--------------------------|------|----------|
| H3 Africa | ENSG00000197140 | ADAM32                   | 1.63 | 4.86E-02 |
| H3 Africa | ENSG00000114315 | HES1                     | 1.63 | 2.94E-02 |
| H3 Africa | ENSG00000124786 | SLC35B3                  | 1.63 | 2.76E-02 |
| H3 Africa | ENSG00000186767 | SPIN4                    | 1.63 | 8.69E-03 |
| H3 Africa | ENSG00000181938 | GINS3                    | 1.64 | 8.55E-03 |
| H3 Africa | ENSG00000158411 | MITD1                    | 1.64 | 1.30E-02 |
| H3 Africa | ENSG00000134057 | CCNB1                    | 1.64 | 4.87E-02 |
| H3 Africa | ENSG00000081052 | COL4A4                   | 1.64 | 1.51E-02 |
| H3 Africa | ENSG00000131788 | PIAS3                    | 1.64 | 1.11E-03 |
| H3 Africa | ENSG00000167202 | TBC1D2B                  | 1.64 | 2.19E-03 |
| H3 Africa | ENSG00000117632 | STMN1                    | 1.64 | 2.26E-02 |
| H3 Africa | ENSG00000188921 | HACD4                    | 1.64 | 3.15E-02 |
| H3 Africa | ENSG00000139173 | TMEM117                  | 1.64 | 4.60E-03 |
| H3 Africa | ENSG00000067369 | TP53BP1                  | 1.64 | 2.92E-03 |
| H3 Africa | ENSG00000115159 | GPD2                     | 1.64 | 4.50E-03 |
| H3 Africa | ENSG00000258405 | ZNF578                   | 1.64 | 7.59E-03 |
| H3 Africa | ENSG00000226816 | AC00508212               | 1.64 | 4.60E-02 |
| H3 Africa | ENSG00000128595 | CALU                     | 1.64 | 1.21E-03 |
| H3 Africa | ENSG00000183049 | CAMK1D                   | 1.64 | 4.45E-02 |
| H3 Africa | ENSG00000163492 | CCDC141                  | 1.64 | 4.13E-02 |
| H3 Africa | ENSG00000213906 | LTB4R2                   | 1.64 | 1.05E-02 |
| H3 Africa | ENSG00000171792 | RHNO1                    | 1.64 | 1.30E-02 |
| H3 Africa | ENSG00000160307 | S100B                    | 1.64 | 8.78E-03 |
| H3 Africa | ENSG00000172554 | SNTG2                    | 1.64 | 2.01E-02 |
| H3 Africa | ENSG00000165025 | SYK                      | 1.64 | 1.99E-02 |
| H3 Africa | ENSG00000281005 | LINC00921                | 1.65 | 3.83E-02 |
| H3 Africa | ENSG00000002586 | CD99                     | 1.65 | 2.57E-03 |
| H3 Africa | ENSG00000225345 | SNX18P3                  | 1.65 | 8.09E-03 |
| H3 Africa | ENSG00000047621 | C12orf4                  | 1.65 | 1.64E-03 |
| H3 Africa | ENSG00000122824 | NUDT10                   | 1.65 | 2.40E-02 |
| H3 Africa | ENSG00000279267 | RP11_395L1418            | 1.65 | 7.28E-03 |
| H3 Africa | ENSG00000121297 | TSHZ3                    | 1.65 | 1.85E-02 |
| H3 Africa | ENSG00000184612 | RPL7P26                  | 1.65 | 2.45E-02 |
| H3 Africa | ENSG00000197959 | DNM3                     | 1.65 | 1.88E-02 |
| H3 Africa | ENSG00000250266 | LINC01612                | 1.65 | 4.47E-02 |
| H3 Africa | ENSG00000138336 | TET1                     | 1.65 | 2.30E-02 |
| H3 Africa | ENSG00000196814 | MVB12B                   | 1.65 | 1.62E-02 |
| H3 Africa | ENSG00000184374 | COLEC10                  | 1.65 | 2.64E-02 |
| H3 Africa | ENSG00000174607 | UGT8                     | 1.65 | 2.22E-02 |
| H3 Africa | ENSG00000102317 | RBM3                     | 1.66 | 3.00E-02 |
| H3 Africa | ENSG00000134278 | SPIRE1                   | 1.66 | 1.50E-02 |
| H3 Africa | ENSG00000178187 | ZNF454                   | 1.66 | 3.08E-03 |
| H3 Africa | ENSG00000087085 | ACHE                     | 1.66 | 3.32E-02 |
| H3 Africa | ENSG00000135245 | HILPDA                   | 1.66 | 1.03E-02 |
| H3 Africa | ENSG00000072864 | NDE1                     | 1.66 | 5.80E-03 |
| H3 Africa | ENSG00000269713 | NBPF10 (includes others) | 1.66 | 6.32E-03 |
| H3 Africa | ENSG00000198538 | ZNF28                    | 1.66 | 1.70E-03 |
| H3 Africa | ENSG00000147883 | CDKN2B                   | 1.66 | 1.27E-02 |
| H3 Africa | ENSG00000248858 | FLJ46284                 | 1.66 | 1.25E-02 |
| H3 Africa | ENSG00000177105 | RHOG                     | 1.66 | 1.82E-03 |
| H3 Africa | ENSG00000127334 | DYRK2                    | 1.66 | 3.09E-02 |
| H3 Africa | ENSG00000110651 | CD81                     | 1.66 | 8.11E-03 |
| H3 Africa | ENSG00000140464 | PML                      | 1.66 | 2.12E-02 |

|           |                 |               |      |          |
|-----------|-----------------|---------------|------|----------|
| H3 Africa | ENSG00000197714 | ZNF460        | 1.66 | 1.63E-03 |
| H3 Africa | ENSG00000111261 | MANSC1        | 1.67 | 9.46E-03 |
| H3 Africa | ENSG00000255874 | PRECSIT       | 1.67 | 3.52E-02 |
| H3 Africa | ENSG00000259520 | SLC28A2-AS1   | 1.67 | 4.10E-02 |
| H3 Africa | ENSG00000179388 | EGR3          | 1.67 | 1.08E-02 |
| H3 Africa | ENSG00000188483 | IER5L         | 1.67 | 3.76E-02 |
| H3 Africa | ENSG00000150093 | ITGB1         | 1.67 | 1.10E-02 |
| H3 Africa | ENSG00000172156 | CCL11         | 1.67 | 1.22E-02 |
| H3 Africa | ENSG00000241014 | GPR199P       | 1.67 | 8.12E-03 |
| H3 Africa | ENSG00000240891 | PLCXD2        | 1.67 | 4.52E-03 |
| H3 Africa | ENSG00000008300 | CELSR3        | 1.67 | 1.23E-02 |
| H3 Africa | ENSG00000127124 | HIVEP3        | 1.67 | 1.16E-02 |
| H3 Africa | ENSG00000171843 | MLLT3         | 1.67 | 3.80E-03 |
| H3 Africa | ENSG00000171016 | PYGO1         | 1.67 | 4.56E-02 |
| H3 Africa | ENSG00000148516 | ZEB1          | 1.67 | 2.90E-02 |
| H3 Africa | ENSG00000118620 | ZNF430        | 1.67 | 2.76E-03 |
| H3 Africa | ENSG00000168491 | CCDC110       | 1.67 | 2.08E-02 |
| H3 Africa | ENSG00000078177 | N4BP2         | 1.67 | 1.18E-03 |
| H3 Africa | ENSG00000267216 | ZNF8-ERVK3-1  | 1.67 | 9.27E-03 |
| H3 Africa | ENSG00000140575 | IQGAP1        | 1.67 | 1.96E-02 |
| H3 Africa | ENSG00000168970 | JMJD7-PLA2G4B | 1.67 | 3.56E-02 |
| H3 Africa | ENSG00000112419 | PHACTR2       | 1.67 | 2.01E-02 |
| H3 Africa | ENSG00000127311 | HELB          | 1.67 | 1.44E-02 |
| H3 Africa | ENSG00000172167 | MTBP          | 1.67 | 4.93E-03 |
| H3 Africa | ENSG00000130813 | SHFL          | 1.67 | 3.19E-03 |
| H3 Africa | ENSG00000160352 | ZNF714        | 1.67 | 8.93E-03 |
| H3 Africa | ENSG00000117318 | ID3           | 1.67 | 3.31E-02 |
| H3 Africa | ENSG00000261371 | PECAM1        | 1.68 | 4.22E-02 |
| H3 Africa | ENSG00000177663 | IL17RA        | 1.68 | 1.85E-02 |
| H3 Africa | ENSG00000128699 | ORMDL1        | 1.68 | 1.40E-02 |
| H3 Africa | ENSG00000114554 | PLXNA1        | 1.68 | 1.41E-02 |
| H3 Africa | ENSG00000169220 | RGS14         | 1.68 | 1.32E-02 |
| H3 Africa | ENSG00000111247 | RAD51AP1      | 1.68 | 1.55E-02 |
| H3 Africa | ENSG00000137135 | ARHGEF39      | 1.68 | 4.44E-02 |
| H3 Africa | ENSG00000184916 | JAG2          | 1.68 | 3.35E-02 |
| H3 Africa | ENSG00000177426 | TGIF1         | 1.68 | 5.41E-03 |
| H3 Africa | ENSG00000197748 | CFAP43        | 1.68 | 2.27E-02 |
| H3 Africa | ENSG00000237441 | RGL2          | 1.68 | 1.20E-02 |
| H3 Africa | ENSG00000273716 | RP11-586D5.3  | 1.68 | 2.66E-02 |
| H3 Africa | ENSG00000253372 | RP11_44N111   | 1.68 | 3.67E-02 |
| H3 Africa | ENSG00000188352 | FOCAD         | 1.69 | 1.38E-03 |
| H3 Africa | ENSG00000114805 | PLCH1         | 1.69 | 4.16E-02 |
| H3 Africa | ENSG00000276600 | RAB7B         | 1.69 | 2.76E-03 |
| H3 Africa | ENSG00000144746 | ARL6IP5       | 1.69 | 1.86E-02 |
| H3 Africa | ENSG00000125845 | BMP2          | 1.69 | 4.65E-02 |
| H3 Africa | ENSG00000277534 | RP11_9E171    | 1.69 | 4.11E-03 |
| H3 Africa | ENSG00000106665 | CLIP2         | 1.69 | 4.81E-02 |
| H3 Africa | ENSG00000182325 | FBXL6         | 1.69 | 4.85E-03 |
| H3 Africa | ENSG00000185917 | SETD4         | 1.69 | 1.76E-02 |
| H3 Africa | ENSG00000145246 | ATP10D        | 1.69 | 1.05E-02 |
| H3 Africa | ENSG00000221869 | CEBPD         | 1.69 | 6.54E-03 |
| H3 Africa | ENSG00000141429 | GALNT1        | 1.69 | 1.87E-03 |
| H3 Africa | ENSG00000115392 | FANCL         | 1.69 | 3.99E-02 |

|           |                 |                 |      |          |
|-----------|-----------------|-----------------|------|----------|
| H3 Africa | ENSG00000170962 | PDGFD           | 1.69 | 2.40E-02 |
| H3 Africa | ENSG00000136147 | PHF11           | 1.69 | 6.36E-03 |
| H3 Africa | ENSG00000099849 | RASSF7          | 1.69 | 2.80E-02 |
| H3 Africa | ENSG00000109689 | STIM2           | 1.69 | 1.39E-03 |
| H3 Africa | ENSG00000149927 | DOC2A           | 1.69 | 1.39E-02 |
| H3 Africa | ENSG00000275714 | H3C1            | 1.69 | 3.89E-02 |
| H3 Africa | ENSG00000170049 | KCNAB3          | 1.69 | 4.58E-02 |
| H3 Africa | ENSG00000009413 | REV3L           | 1.69 | 1.34E-03 |
| H3 Africa | ENSG00000144791 | LIMD1           | 1.69 | 1.28E-03 |
| H3 Africa | ENSG00000137269 | LRRC1           | 1.69 | 6.63E-03 |
| H3 Africa | ENSG00000163491 | NEK10           | 1.69 | 3.20E-03 |
| H3 Africa | ENSG00000177839 | PCDHB9          | 1.69 | 1.40E-02 |
| H3 Africa | ENSG00000254221 | PCDHGB1         | 1.69 | 3.40E-02 |
| H3 Africa | ENSG00000105355 | PLIN3           | 1.69 | 5.93E-03 |
| H3 Africa | ENSG00000111834 | RSPH4A          | 1.69 | 1.17E-02 |
| H3 Africa | ENSG00000174844 | DNAH12          | 1.70 | 1.19E-02 |
| H3 Africa | ENSG00000068885 | IFT80           | 1.70 | 1.41E-02 |
| H3 Africa | ENSG00000128604 | IRF5            | 1.70 | 1.05E-02 |
| H3 Africa | ENSG00000175906 | ARL4D           | 1.70 | 4.40E-02 |
| H3 Africa | ENSG00000101224 | CDC25B          | 1.70 | 2.62E-02 |
| H3 Africa | ENSG00000160447 | PKN3            | 1.70 | 7.37E-03 |
| H3 Africa | ENSG00000167637 | ZNF283          | 1.70 | 6.84E-03 |
| H3 Africa | ENSG00000139597 | N4BP2L1         | 1.70 | 3.78E-02 |
| H3 Africa | ENSG00000181458 | TMEM45A         | 1.70 | 1.30E-02 |
| H3 Africa | ENSG00000196843 | ARID5A          | 1.70 | 4.17E-03 |
| H3 Africa | ENSG00000173557 | FAM166C         | 1.70 | 5.00E-03 |
| H3 Africa | ENSG00000105976 | MET             | 1.70 | 2.00E-02 |
| H3 Africa | ENSG00000277072 | STAG3L2/STAG3L3 | 1.70 | 3.76E-02 |
| H3 Africa | ENSG00000158234 | FAIM            | 1.70 | 1.29E-02 |
| H3 Africa | ENSG00000092841 | MYL6            | 1.70 | 5.83E-03 |
| H3 Africa | ENSG00000206530 | CFAP44          | 1.70 | 2.79E-02 |
| H3 Africa | ENSG00000163508 | EOMES           | 1.70 | 1.86E-02 |
| H3 Africa | ENSG00000167785 | ZNF558          | 1.70 | 2.46E-02 |
| H3 Africa | ENSG00000188931 | CFAP126         | 1.70 | 8.67E-04 |
| H3 Africa | ENSG00000127084 | FGD3            | 1.71 | 3.36E-02 |
| H3 Africa | ENSG00000141510 | TP53            | 1.71 | 1.50E-02 |
| H3 Africa | ENSG00000105711 | SCN1B           | 1.71 | 6.11E-03 |
| H3 Africa | ENSG00000139146 | SINHCAF         | 1.71 | 2.31E-03 |
| H3 Africa | ENSG00000113368 | LMNB1           | 1.71 | 4.24E-02 |
| H3 Africa | ENSG00000175602 | CCDC85B         | 1.71 | 3.89E-02 |
| H3 Africa | ENSG00000100503 | NIN             | 1.71 | 1.31E-02 |
| H3 Africa | ENSG00000132359 | RAP1GAP2        | 1.71 | 1.23E-02 |
| H3 Africa | ENSG00000165300 | SLITRK5         | 1.71 | 1.22E-02 |
| H3 Africa | ENSG00000170837 | GPR27           | 1.71 | 1.74E-02 |
| H3 Africa | ENSG00000116157 | GPX7            | 1.71 | 1.39E-02 |
| H3 Africa | ENSG00000221949 | LINC01465       | 1.71 | 1.23E-03 |
| H3 Africa | ENSG00000171889 | MIR31HG         | 1.71 | 3.89E-02 |
| H3 Africa | ENSG00000134901 | POGLUT2         | 1.71 | 9.72E-03 |
| H3 Africa | ENSG00000227615 | RP11_864N72     | 1.71 | 3.29E-02 |
| H3 Africa | ENSG00000196220 | SRGAP3          | 1.71 | 1.53E-02 |
| H3 Africa | ENSG00000112343 | TRIM38          | 1.71 | 1.83E-02 |
| H3 Africa | ENSG00000213261 | EEF1B2P6        | 1.71 | 2.94E-02 |
| H3 Africa | ENSG00000204634 | TBC1D8          | 1.71 | 4.14E-03 |

|           |                 |                   |      |          |
|-----------|-----------------|-------------------|------|----------|
| H3 Africa | ENSG00000188707 | ZBED10P           | 1.71 | 6.24E-03 |
| H3 Africa | ENSG00000140403 | DNAJA4            | 1.71 | 7.26E-03 |
| H3 Africa | ENSG00000169435 | RASSF6            | 1.71 | 3.16E-02 |
| H3 Africa | ENSG00000152128 | TMEM163           | 1.71 | 2.69E-02 |
| H3 Africa | ENSG00000188321 | ZNF559            | 1.71 | 1.57E-02 |
| H3 Africa | ENSG00000102384 | CENPI             | 1.72 | 2.44E-03 |
| H3 Africa | ENSG00000197965 | MPZL1             | 1.72 | 1.59E-03 |
| H3 Africa | ENSG00000174004 | NRROS             | 1.72 | 1.67E-02 |
| H3 Africa | ENSG00000236514 | RP11_162G105      | 1.72 | 3.53E-02 |
| H3 Africa | ENSG00000026297 | RNASSET2          | 1.72 | 1.52E-02 |
| H3 Africa | ENSG00000139636 | LMBR1L            | 1.72 | 2.68E-02 |
| H3 Africa | ENSG00000103202 | NME4              | 1.72 | 1.06E-02 |
| H3 Africa | ENSG00000160271 | RALGDS            | 1.72 | 1.70E-03 |
| H3 Africa | ENSG00000185947 | ZNF267            | 1.72 | 8.12E-04 |
| H3 Africa | ENSG00000177685 | CRACR2B           | 1.72 | 2.34E-02 |
| H3 Africa | ENSG00000164330 | EBF1              | 1.72 | 2.77E-02 |
| H3 Africa | ENSG00000151322 | NPAS3             | 1.72 | 4.14E-02 |
| H3 Africa | ENSG00000181690 | PLAG1             | 1.72 | 1.19E-02 |
| H3 Africa | ENSG00000115875 | SRSF7             | 1.72 | 1.58E-02 |
| H3 Africa | ENSG00000166557 | TMED3             | 1.72 | 3.94E-03 |
| H3 Africa | ENSG00000131873 | CHSY1             | 1.72 | 9.80E-04 |
| H3 Africa | ENSG00000102780 | DGKH              | 1.72 | 2.68E-02 |
| H3 Africa | ENSG00000134504 | KCTD1             | 1.72 | 4.25E-03 |
| H3 Africa | ENSG00000231711 | LINC00899         | 1.72 | 5.48E-03 |
| H3 Africa | ENSG00000229891 | LINC01315         | 1.73 | 3.94E-02 |
| H3 Africa | ENSG00000115252 | PDE1A             | 1.73 | 2.70E-02 |
| H3 Africa | ENSG00000100625 | SIX4              | 1.73 | 3.82E-03 |
| H3 Africa | ENSG00000175161 | CADM2             | 1.73 | 6.61E-03 |
| H3 Africa | ENSG00000213719 | CLIC1             | 1.73 | 5.49E-04 |
| H3 Africa | ENSG00000176390 | CRLF3             | 1.73 | 2.72E-03 |
| H3 Africa | ENSG00000253846 | PCDHGA10          | 1.73 | 1.48E-03 |
| H3 Africa | ENSG00000153933 | DGKE              | 1.73 | 1.15E-02 |
| H3 Africa | ENSG00000219133 | RP11_203F106      | 1.73 | 3.34E-02 |
| H3 Africa | ENSG00000163596 | ICA1L             | 1.73 | 8.14E-03 |
| H3 Africa | ENSG00000131378 | RFTN1             | 1.73 | 1.51E-02 |
| H3 Africa | ENSG00000179588 | ZFPM1             | 1.73 | 1.85E-02 |
| H3 Africa | ENSG00000100376 | FAM118A           | 1.73 | 9.86E-03 |
| H3 Africa | ENSG00000247982 | LINC00926         | 1.73 | 8.22E-03 |
| H3 Africa | ENSG00000146143 | PRIM2             | 1.73 | 1.57E-04 |
| H3 Africa | ENSG00000234420 | ZNF37BP           | 1.73 | 1.08E-02 |
| H3 Africa | ENSG00000020181 | ADGRA2            | 1.73 | 1.61E-02 |
| H3 Africa | ENSG00000164109 | MAD2L1            | 1.73 | 9.17E-03 |
| H3 Africa | ENSG00000179630 | LACC1             | 1.74 | 1.08E-02 |
| H3 Africa | ENSG00000087245 | MMP2              | 1.74 | 2.22E-02 |
| H3 Africa | ENSG00000138496 | PARP9             | 1.74 | 6.01E-03 |
| H3 Africa | ENSG00000180096 | SEPTIN1           | 1.74 | 1.51E-03 |
| H3 Africa | ENSG00000144554 | FANCD2            | 1.74 | 3.74E-02 |
| H3 Africa | ENSG00000135622 | SEMA4F            | 1.74 | 1.53E-03 |
| H3 Africa | ENSG00000162543 | UBXN10            | 1.74 | 1.36E-02 |
| H3 Africa | ENSG00000184047 | DIABLO            | 1.74 | 3.72E-02 |
| H3 Africa | ENSG00000278637 | H4C1              | 1.74 | 3.10E-02 |
| H3 Africa | ENSG00000102349 | KLF8              | 1.74 | 3.04E-03 |
| H3 Africa | ENSG00000158747 | MICOS10-NBL1/NBL1 | 1.74 | 3.35E-02 |

|           |                 |                         |      |          |
|-----------|-----------------|-------------------------|------|----------|
| H3 Africa | ENSG00000126215 | XRCC3                   | 1.74 | 7.19E-03 |
| H3 Africa | ENSG00000128918 | ALDH1A2                 | 1.74 | 2.07E-02 |
| H3 Africa | ENSG00000137486 | ARRB1                   | 1.74 | 2.61E-03 |
| H3 Africa | ENSG00000120217 | CD274                   | 1.74 | 1.69E-03 |
| H3 Africa | ENSG00000151474 | FRMD4A                  | 1.74 | 1.33E-03 |
| H3 Africa | ENSG00000187889 | FYB2                    | 1.74 | 4.57E-02 |
| H3 Africa | ENSG00000203943 | SAMD13                  | 1.74 | 6.76E-03 |
| H3 Africa | ENSG00000101384 | JAG1                    | 1.74 | 5.18E-03 |
| H3 Africa | ENSG00000085999 | RAD54L                  | 1.74 | 1.11E-02 |
| H3 Africa | ENSG00000197928 | ZNF677                  | 1.74 | 6.41E-03 |
| H3 Africa | ENSG00000165801 | ARHGEF40                | 1.74 | 3.34E-02 |
| H3 Africa | ENSG00000188649 | CC2D2B                  | 1.74 | 1.68E-02 |
| H3 Africa | ENSG00000107821 | KAZALD1                 | 1.74 | 2.43E-03 |
| H3 Africa | ENSG00000181026 | AEN                     | 1.74 | 3.16E-02 |
| H3 Africa | ENSG00000162650 | ATXN7L2                 | 1.74 | 1.03E-02 |
| H3 Africa | ENSG00000163378 | EOGT                    | 1.74 | 6.59E-04 |
| H3 Africa | ENSG00000078269 | SYNJ2                   | 1.74 | 1.10E-02 |
| H3 Africa | ENSG00000178904 | DPY19L3                 | 1.74 | 5.66E-05 |
| H3 Africa | ENSG00000242094 | FOXP1-IT1               | 1.74 | 2.59E-02 |
| H3 Africa | ENSG00000200795 | RNU4-1                  | 1.74 | 2.71E-02 |
| H3 Africa | ENSG00000167513 | CDT1                    | 1.75 | 2.34E-02 |
| H3 Africa | ENSG00000134574 | DDB2                    | 1.75 | 1.87E-02 |
| H3 Africa | ENSG00000251292 | ERVH-1                  | 1.75 | 1.69E-03 |
| H3 Africa | ENSG00000135063 | FAM189A2                | 1.75 | 1.60E-02 |
| H3 Africa | ENSG00000165495 | PKNOX2                  | 1.75 | 4.51E-02 |
| H3 Africa | ENSG00000182621 | PLCB1                   | 1.75 | 2.35E-02 |
| H3 Africa | ENSG00000280255 | RP5_1007F241            | 1.75 | 6.32E-04 |
| H3 Africa | ENSG00000124019 | FAM124B                 | 1.75 | 1.49E-03 |
| H3 Africa | ENSG00000184949 | FAM227A                 | 1.75 | 4.15E-02 |
| H3 Africa | ENSG00000145391 | SETD7                   | 1.75 | 1.14E-02 |
| H3 Africa | ENSG00000106868 | SUSD1                   | 1.75 | 5.90E-03 |
| H3 Africa | ENSG00000106477 | CEP41                   | 1.75 | 3.34E-03 |
| H3 Africa | ENSG00000106080 | FKBP14                  | 1.75 | 4.98E-04 |
| H3 Africa | ENSG00000160991 | ORAI2                   | 1.75 | 5.28E-03 |
| H3 Africa | ENSG00000118690 | ARMC2                   | 1.75 | 4.25E-03 |
| H3 Africa | ENSG00000127586 | CHTF18                  | 1.75 | 1.46E-02 |
| H3 Africa | ENSG00000162552 | WNT4                    | 1.75 | 8.83E-03 |
| H3 Africa | ENSG00000112761 | CCN6                    | 1.75 | 2.36E-02 |
| H3 Africa | ENSG00000100162 | CENPM                   | 1.75 | 1.62E-02 |
| H3 Africa | ENSG00000173085 | COQ2                    | 1.75 | 3.18E-03 |
| H3 Africa | ENSG00000196369 | SRGAP2B                 | 1.75 | 1.21E-02 |
| H3 Africa | ENSG00000110002 | VWA5A                   | 1.76 | 4.05E-03 |
| H3 Africa | ENSG00000189007 | ADAT2                   | 1.76 | 6.10E-03 |
| H3 Africa | ENSG00000054392 | HHAT                    | 1.76 | 4.73E-02 |
| H3 Africa | ENSG00000182013 | PNMA8A                  | 1.76 | 4.34E-02 |
| H3 Africa | ENSG00000120458 | MSANTD2                 | 1.76 | 1.33E-02 |
| H3 Africa | ENSG00000095587 | TLL2                    | 1.76 | 2.37E-02 |
| H3 Africa | ENSG00000182963 | GJC1                    | 1.76 | 1.50E-02 |
| H3 Africa | ENSG00000117569 | PTBP2                   | 1.76 | 4.66E-03 |
| H3 Africa | ENSG00000204149 | AGAP6 (includes others) | 1.76 | 3.96E-02 |
| H3 Africa | ENSG00000164743 | C8orf48                 | 1.76 | 2.55E-03 |
| H3 Africa | ENSG00000107249 | GLIS3                   | 1.76 | 2.99E-03 |
| H3 Africa | ENSG00000124831 | LRRFIP1                 | 1.76 | 1.34E-03 |

|           |                 |            |      |          |
|-----------|-----------------|------------|------|----------|
| H3 Africa | ENSG00000154553 | PDLIM3     | 1.76 | 1.18E-02 |
| H3 Africa | ENSG00000124496 | TRERF1     | 1.76 | 6.02E-03 |
| H3 Africa | ENSG00000151376 | ME3        | 1.76 | 2.20E-02 |
| H3 Africa | ENSG00000164305 | CASP3      | 1.77 | 1.49E-04 |
| H3 Africa | ENSG00000185842 | DNAH14     | 1.77 | 3.66E-02 |
| H3 Africa | ENSG00000007384 | RHBDF1     | 1.77 | 5.91E-03 |
| H3 Africa | ENSG00000136149 | RPL13AP25  | 1.77 | 3.35E-02 |
| H3 Africa | ENSG00000137098 | SPAG8      | 1.77 | 3.61E-02 |
| H3 Africa | ENSG00000254614 | CAPN1-AS1  | 1.77 | 3.07E-02 |
| H3 Africa | ENSG00000179242 | CDH4       | 1.77 | 4.85E-02 |
| H3 Africa | ENSG00000172638 | EFEMP2     | 1.77 | 1.27E-02 |
| H3 Africa | ENSG00000046889 | PREX2      | 1.77 | 4.22E-02 |
| H3 Africa | ENSG00000155962 | CLIC2      | 1.77 | 7.20E-03 |
| H3 Africa | ENSG00000197020 | ZNF100     | 1.77 | 2.22E-02 |
| H3 Africa | ENSG00000085662 | AKR1B1     | 1.77 | 3.25E-03 |
| H3 Africa | ENSG00000166762 | CATSPER2   | 1.77 | 1.29E-02 |
| H3 Africa | ENSG00000183298 | RPSAP19    | 1.77 | 2.27E-02 |
| H3 Africa | ENSG00000167065 | DUSP18     | 1.77 | 3.35E-03 |
| H3 Africa | ENSG00000184574 | LPAR5      | 1.77 | 3.75E-02 |
| H3 Africa | ENSG00000166960 | CCDC178    | 1.77 | 1.33E-02 |
| H3 Africa | ENSG00000162601 | MYSM1      | 1.77 | 4.35E-04 |
| H3 Africa | ENSG00000179431 | FJX1       | 1.77 | 1.30E-02 |
| H3 Africa | ENSG00000204397 | CARD16     | 1.78 | 2.84E-03 |
| H3 Africa | ENSG00000077458 | FAM76B     | 1.78 | 4.80E-03 |
| H3 Africa | ENSG00000171815 | PCDHB1     | 1.78 | 8.00E-03 |
| H3 Africa | ENSG00000144843 | ADPRH      | 1.78 | 1.62E-03 |
| H3 Africa | ENSG00000137101 | CD72       | 1.78 | 3.54E-03 |
| H3 Africa | ENSG00000077782 | FGFR1      | 1.78 | 1.27E-02 |
| H3 Africa | ENSG00000152207 | CYSLTR2    | 1.78 | 2.22E-02 |
| H3 Africa | ENSG00000130158 | DOCK6      | 1.78 | 9.31E-03 |
| H3 Africa | ENSG00000151690 | MFSD6      | 1.78 | 2.26E-02 |
| H3 Africa | ENSG00000142675 | CNKSR1     | 1.78 | 2.47E-02 |
| H3 Africa | ENSG00000099284 | MACROH2A2  | 1.78 | 3.90E-03 |
| H3 Africa | ENSG00000219470 | RP3_337H46 | 1.78 | 2.50E-02 |
| H3 Africa | ENSG00000107201 | DDX58      | 1.78 | 8.98E-04 |
| H3 Africa | ENSG00000198018 | ENTPD7     | 1.78 | 1.29E-02 |
| H3 Africa | ENSG00000135414 | GDF11      | 1.78 | 2.77E-03 |
| H3 Africa | ENSG00000138080 | EMILIN1    | 1.78 | 1.52E-02 |
| H3 Africa | ENSG00000247596 | TWF2       | 1.78 | 2.88E-03 |
| H3 Africa | ENSG00000185033 | SEMA4B     | 1.79 | 8.42E-03 |
| H3 Africa | ENSG00000138658 | ZGRF1      | 1.79 | 3.45E-02 |
| H3 Africa | ENSG00000005073 | HOXA11     | 1.79 | 9.16E-03 |
| H3 Africa | ENSG00000141293 | SKAP1      | 1.79 | 1.04E-02 |
| H3 Africa | ENSG00000235776 | AC0000893  | 1.79 | 2.14E-02 |
| H3 Africa | ENSG00000139318 | DUSP6      | 1.79 | 4.09E-02 |
| H3 Africa | ENSG00000143297 | FCRL5      | 1.79 | 4.70E-02 |
| H3 Africa | ENSG00000157368 | IL34       | 1.79 | 1.64E-02 |
| H3 Africa | ENSG00000145491 | ROPN1L     | 1.79 | 2.10E-04 |
| H3 Africa | ENSG00000075213 | SEMA3A     | 1.79 | 2.95E-03 |
| H3 Africa | ENSG00000182541 | LIMK2      | 1.79 | 1.80E-03 |
| H3 Africa | ENSG00000185834 | RPL12P4    | 1.79 | 7.96E-03 |
| H3 Africa | ENSG00000149418 | ST14       | 1.79 | 4.13E-02 |
| H3 Africa | ENSG00000124749 | COL21A1    | 1.79 | 4.26E-03 |

|           |                 |                          |      |          |
|-----------|-----------------|--------------------------|------|----------|
| H3 Africa | ENSG00000125354 | SEPTIN6                  | 1.79 | 7.40E-04 |
| H3 Africa | ENSG00000114770 | ABCC5                    | 1.79 | 8.93E-03 |
| H3 Africa | ENSG00000163808 | KIF15                    | 1.79 | 5.12E-03 |
| H3 Africa | ENSG00000215146 | LOC441666                | 1.79 | 2.40E-02 |
| H3 Africa | ENSG00000277224 | H2BC7                    | 1.79 | 2.30E-02 |
| H3 Africa | ENSG00000169026 | SLC49A3                  | 1.79 | 2.23E-02 |
| H3 Africa | ENSG00000169621 | APLF                     | 1.79 | 6.73E-03 |
| H3 Africa | ENSG00000136261 | BZW2                     | 1.79 | 1.77E-03 |
| H3 Africa | ENSG00000007968 | E2F2                     | 1.79 | 1.91E-02 |
| H3 Africa | ENSG00000163453 | IGFBP7                   | 1.79 | 1.09E-02 |
| H3 Africa | ENSG00000204366 | ZBTB12                   | 1.79 | 7.85E-04 |
| H3 Africa | ENSG00000243710 | CFAP57                   | 1.80 | 1.11E-02 |
| H3 Africa | ENSG00000133106 | EPST11                   | 1.80 | 1.00E-02 |
| H3 Africa | ENSG00000078596 | ITM2A                    | 1.80 | 4.30E-03 |
| H3 Africa | ENSG00000116141 | MARK1                    | 1.80 | 2.97E-03 |
| H3 Africa | ENSG00000145860 | RNF145                   | 1.80 | 1.29E-03 |
| H3 Africa | ENSG00000076003 | MCM6                     | 1.80 | 1.24E-03 |
| H3 Africa | ENSG00000187372 | PCDHB13                  | 1.80 | 2.01E-02 |
| H3 Africa | ENSG00000231551 | PDE4DIPP6                | 1.80 | 7.75E-04 |
| H3 Africa | ENSG00000122644 | ARL4A                    | 1.80 | 5.96E-04 |
| H3 Africa | ENSG00000261064 | LINC02256                | 1.80 | 7.99E-03 |
| H3 Africa | ENSG00000172667 | ZMAT3                    | 1.80 | 2.27E-02 |
| H3 Africa | ENSG00000225614 | ZNF469                   | 1.80 | 1.49E-02 |
| H3 Africa | ENSG00000189223 | PAX8-AS1                 | 1.80 | 1.08E-02 |
| H3 Africa | ENSG00000131153 | GINS2                    | 1.80 | 6.51E-03 |
| H3 Africa | ENSG00000100036 | SLC35E4                  | 1.80 | 1.02E-03 |
| H3 Africa | ENSG00000116991 | SIPA1L2                  | 1.80 | 3.02E-02 |
| H3 Africa | ENSG00000270629 | NBPF10 (includes others) | 1.80 | 2.52E-02 |
| H3 Africa | ENSG00000229474 | PATL2                    | 1.80 | 6.01E-03 |
| H3 Africa | ENSG00000005189 | REXO5                    | 1.80 | 4.87E-03 |
| H3 Africa | ENSG00000165424 | ZCCHC24                  | 1.80 | 5.60E-04 |
| H3 Africa | ENSG00000274265 | CH17_189H201             | 1.80 | 9.80E-03 |
| H3 Africa | ENSG00000176435 | CLEC14A                  | 1.80 | 2.89E-02 |
| H3 Africa | ENSG00000132424 | PNISR                    | 1.80 | 3.05E-02 |
| H3 Africa | ENSG00000124802 | EEF1E1                   | 1.81 | 4.66E-03 |
| H3 Africa | ENSG00000174371 | EXO1                     | 1.81 | 1.78E-03 |
| H3 Africa | ENSG00000226777 | FAM30A                   | 1.81 | 1.52E-02 |
| H3 Africa | ENSG00000204387 | SNHG32                   | 1.81 | 4.14E-02 |
| H3 Africa | ENSG00000271918 | CTD_2287O165             | 1.81 | 4.95E-02 |
| H3 Africa | ENSG00000111674 | ENO2                     | 1.81 | 3.50E-02 |
| H3 Africa | ENSG00000019144 | PHLDB1                   | 1.81 | 1.20E-02 |
| H3 Africa | ENSG00000272927 | RP11_1191J25             | 1.81 | 9.28E-03 |
| H3 Africa | ENSG00000131127 | ZNF141                   | 1.81 | 6.32E-03 |
| H3 Africa | ENSG00000180071 | ANKRD18A                 | 1.81 | 2.05E-02 |
| H3 Africa | ENSG00000152669 | CCNO                     | 1.81 | 1.01E-02 |
| H3 Africa | ENSG00000133574 | GIMAP4                   | 1.81 | 6.40E-03 |
| H3 Africa | ENSG00000249158 | PCDHA11                  | 1.81 | 2.01E-02 |
| H3 Africa | ENSG00000198346 | ZNF813                   | 1.81 | 3.99E-03 |
| H3 Africa | ENSG00000226864 | ATE1-AS1                 | 1.81 | 2.40E-02 |
| H3 Africa | ENSG00000091490 | SEL1L3                   | 1.81 | 1.82E-02 |
| H3 Africa | ENSG00000204344 | STK19                    | 1.81 | 1.18E-03 |
| H3 Africa | ENSG00000179909 | ZNF154                   | 1.81 | 1.05E-02 |
| H3 Africa | ENSG00000101412 | E2F1                     | 1.81 | 2.31E-02 |



|           |                 |               |      |          |
|-----------|-----------------|---------------|------|----------|
| H3 Africa | ENSG00000162654 | GBP4          | 1.81 | 1.17E-02 |
| H3 Africa | ENSG00000006453 | BAIAP2L1      | 1.81 | 1.79E-02 |
| H3 Africa | ENSG00000162747 | FCGR3A/FCGR3B | 1.81 | 2.31E-02 |
| H3 Africa | ENSG00000004399 | PLXND1        | 1.81 | 2.27E-03 |
| H3 Africa | ENSG00000196605 | ZNF846        | 1.81 | 1.93E-02 |
| H3 Africa | ENSG00000107833 | NPM3          | 1.81 | 1.99E-03 |
| H3 Africa | ENSG00000166532 | RIMKLB        | 1.81 | 6.70E-04 |
| H3 Africa | ENSG00000133466 | C1QTNF6       | 1.82 | 2.24E-02 |
| H3 Africa | ENSG00000170959 | DCDC1         | 1.82 | 4.09E-03 |
| H3 Africa | ENSG00000138670 | RASGEF1B      | 1.82 | 3.13E-02 |
| H3 Africa | ENSG00000181378 | CFAP65        | 1.82 | 3.54E-03 |
| H3 Africa | ENSG00000237187 | NR2F1-AS1     | 1.82 | 4.55E-02 |
| H3 Africa | ENSG00000129219 | PLD2          | 1.82 | 1.91E-04 |
| H3 Africa | ENSG00000196371 | FUT4          | 1.82 | 8.55E-03 |
| H3 Africa | ENSG00000132196 | HSD17B7       | 1.82 | 1.06E-03 |
| H3 Africa | ENSG00000274964 | RP11_817I41   | 1.82 | 6.46E-04 |
| H3 Africa | ENSG00000169554 | ZEB2          | 1.82 | 2.61E-04 |
| H3 Africa | ENSG00000140479 | PCSK6         | 1.82 | 4.28E-02 |
| H3 Africa | ENSG00000273802 | H2BC8         | 1.83 | 2.60E-02 |
| H3 Africa | ENSG00000176998 | HCG4          | 1.83 | 1.24E-02 |
| H3 Africa | ENSG00000125898 | FAM110A       | 1.83 | 1.23E-03 |
| H3 Africa | ENSG00000188659 | SAXO2         | 1.83 | 3.57E-02 |
| H3 Africa | ENSG00000153253 | SCN3A         | 1.83 | 1.22E-02 |
| H3 Africa | ENSG00000176454 | LPCAT4        | 1.83 | 5.96E-04 |
| H3 Africa | ENSG00000161970 | RPL26         | 1.83 | 4.15E-02 |
| H3 Africa | ENSG00000123685 | BATF3         | 1.83 | 6.57E-03 |
| H3 Africa | ENSG00000102034 | ELF4          | 1.83 | 3.63E-02 |
| H3 Africa | ENSG00000165152 | PGAP4         | 1.83 | 2.75E-02 |
| H3 Africa | ENSG00000112759 | SLC29A1       | 1.83 | 2.08E-02 |
| H3 Africa | ENSG00000157111 | TMEM171       | 1.83 | 2.89E-02 |
| H3 Africa | ENSG00000131188 | PRR7          | 1.83 | 1.95E-03 |
| H3 Africa | ENSG00000196247 | ZNF107        | 1.83 | 1.51E-03 |
| H3 Africa | ENSG00000262943 | ALOX12P2      | 1.83 | 3.76E-02 |
| H3 Africa | ENSG00000228409 | CCT6P1        | 1.83 | 4.02E-02 |
| H3 Africa | ENSG00000197536 | IRF1-AS1      | 1.83 | 2.18E-03 |
| H3 Africa | ENSG00000186314 | PRELID2       | 1.83 | 4.90E-03 |
| H3 Africa | ENSG00000138623 | SEMA7A        | 1.83 | 2.39E-02 |
| H3 Africa | ENSG00000165105 | RASEF         | 1.83 | 1.62E-02 |
| H3 Africa | ENSG00000233101 | HOXB-AS3      | 1.83 | 1.87E-02 |
| H3 Africa | ENSG00000030419 | IKZF2         | 1.83 | 3.59E-04 |
| H3 Africa | ENSG00000105655 | ISYNA1        | 1.83 | 4.60E-03 |
| H3 Africa | ENSG00000008516 | MMP25         | 1.83 | 5.68E-05 |
| H3 Africa | ENSG00000112742 | TTK           | 1.83 | 7.92E-03 |
| H3 Africa | ENSG00000011201 | ANOS1         | 1.84 | 2.40E-03 |
| H3 Africa | ENSG00000130270 | ATP8B3        | 1.84 | 3.54E-03 |
| H3 Africa | ENSG00000186810 | CXCR3         | 1.84 | 2.94E-04 |
| H3 Africa | ENSG00000266865 | LOC107984974  | 1.84 | 1.03E-02 |
| H3 Africa | ENSG00000145685 | LHFPL2        | 1.84 | 1.90E-02 |
| H3 Africa | ENSG00000163364 | LINC01116     | 1.84 | 1.10E-02 |
| H3 Africa | ENSG00000083535 | PIBF1         | 1.84 | 8.11E-04 |
| H3 Africa | ENSG00000073861 | TBX21         | 1.84 | 1.51E-03 |
| H3 Africa | ENSG00000152818 | UTRN          | 1.84 | 7.67E-04 |
| H3 Africa | ENSG00000154099 | DNAAF1        | 1.84 | 2.12E-02 |

|           |                 |             |      |          |
|-----------|-----------------|-------------|------|----------|
| H3 Africa | ENSG00000136830 | NIBAN2      | 1.84 | 1.71E-02 |
| H3 Africa | ENSG00000137804 | NUSAP1      | 1.84 | 2.14E-02 |
| H3 Africa | ENSG00000183458 | PKD1P3      | 1.84 | 4.02E-02 |
| H3 Africa | ENSG00000173821 | RNF213      | 1.84 | 3.83E-02 |
| H3 Africa | ENSG00000203706 | SERTAD4-AS1 | 1.84 | 3.71E-02 |
| H3 Africa | ENSG00000156515 | HK1         | 1.84 | 2.10E-03 |
| H3 Africa | ENSG00000225792 | SNX10-AS1   | 1.84 | 4.34E-03 |
| H3 Africa | ENSG00000130332 | LSM7        | 1.84 | 4.86E-03 |
| H3 Africa | ENSG00000273542 | H4C12       | 1.85 | 4.87E-02 |
| H3 Africa | ENSG00000156970 | BUB1B       | 1.85 | 4.94E-03 |
| H3 Africa | ENSG00000106701 | FSD1L       | 1.85 | 1.82E-03 |
| H3 Africa | ENSG00000184194 | GPR173      | 1.85 | 1.31E-02 |
| H3 Africa | ENSG00000081059 | TCF7        | 1.85 | 3.72E-03 |
| H3 Africa | ENSG00000108700 | CCL8        | 1.85 | 5.55E-04 |
| H3 Africa | ENSG00000109674 | NEIL3       | 1.85 | 3.67E-03 |
| H3 Africa | ENSG00000140450 | ARRDC4      | 1.85 | 2.06E-02 |
| H3 Africa | ENSG00000100060 | MFNG        | 1.85 | 8.32E-03 |
| H3 Africa | ENSG00000149534 | MS4A2       | 1.85 | 1.93E-02 |
| H3 Africa | ENSG00000046651 | OFD1        | 1.85 | 2.90E-03 |
| H3 Africa | ENSG00000163535 | SGO2        | 1.85 | 6.28E-03 |
| H3 Africa | ENSG00000069399 | BCL3        | 1.85 | 3.83E-02 |
| H3 Africa | ENSG00000051341 | POLQ        | 1.85 | 9.92E-03 |
| H3 Africa | ENSG00000230897 | RPS18P12    | 1.85 | 3.00E-02 |
| H3 Africa | ENSG00000116544 | DLGAP3      | 1.85 | 2.13E-03 |
| H3 Africa | ENSG00000143369 | ECM1        | 1.85 | 1.83E-02 |
| H3 Africa | ENSG00000065833 | ME1         | 1.85 | 3.23E-02 |
| H3 Africa | ENSG00000204520 | MICA        | 1.85 | 7.99E-03 |
| H3 Africa | ENSG00000005249 | PRKAR2B     | 1.85 | 1.92E-02 |
| H3 Africa | ENSG00000167695 | TLCD3A      | 1.85 | 2.99E-03 |
| H3 Africa | ENSG00000075643 | MOCOS       | 1.86 | 3.11E-03 |
| H3 Africa | ENSG00000226360 | RPL10AP6    | 1.86 | 1.17E-02 |
| H3 Africa | ENSG00000173457 | PPP1R14B    | 1.86 | 7.97E-03 |
| H3 Africa | ENSG00000197457 | STMN3       | 1.86 | 9.11E-03 |
| H3 Africa | ENSG00000118257 | NRP2        | 1.86 | 1.02E-02 |
| H3 Africa | ENSG00000077264 | PAK3        | 1.86 | 1.36E-02 |
| H3 Africa | ENSG00000203952 | CCDC160     | 1.86 | 2.80E-02 |
| H3 Africa | ENSG00000221968 | FADS3       | 1.86 | 1.44E-03 |
| H3 Africa | ENSG00000218336 | TENM3       | 1.86 | 4.21E-02 |
| H3 Africa | ENSG00000134884 | ARGLU1      | 1.86 | 3.49E-02 |
| H3 Africa | ENSG00000058668 | ATP2B4      | 1.86 | 4.19E-02 |
| H3 Africa | ENSG00000162063 | CCNF        | 1.86 | 2.16E-02 |
| H3 Africa | ENSG00000125744 | RTN2        | 1.86 | 5.75E-03 |
| H3 Africa | ENSG00000142686 | C1orf216    | 1.86 | 3.13E-03 |
| H3 Africa | ENSG00000213923 | CSNK1E      | 1.86 | 4.47E-04 |
| H3 Africa | ENSG00000198873 | GRK5        | 1.86 | 4.13E-03 |
| H3 Africa | ENSG00000196511 | TPK1        | 1.86 | 3.08E-03 |
| H3 Africa | ENSG00000188001 | TPRG1       | 1.86 | 1.28E-02 |
| H3 Africa | ENSG00000116574 | RHOU        | 1.86 | 3.45E-03 |
| H3 Africa | ENSG00000125657 | TNFSF9      | 1.86 | 1.24E-02 |
| H3 Africa | ENSG00000188185 | LINC00265   | 1.87 | 1.11E-02 |
| H3 Africa | ENSG00000168476 | REEP4       | 1.87 | 3.69E-03 |
| H3 Africa | ENSG00000277147 | LINC00869   | 1.87 | 3.06E-02 |
| H3 Africa | ENSG00000244625 | MIATNB      | 1.87 | 4.56E-03 |

|           |                 |               |      |          |
|-----------|-----------------|---------------|------|----------|
| H3 Africa | ENSG00000198520 | ARMH1         | 1.87 | 4.09E-02 |
| H3 Africa | ENSG00000105519 | CAPS          | 1.87 | 4.35E-03 |
| H3 Africa | ENSG00000071967 | CYBRD1        | 1.87 | 1.24E-02 |
| H3 Africa | ENSG00000232385 | RPS3AP25      | 1.87 | 7.76E-03 |
| H3 Africa | ENSG00000181104 | F2R           | 1.87 | 1.23E-02 |
| H3 Africa | ENSG00000153714 | LURAP1L       | 1.87 | 6.68E-03 |
| H3 Africa | ENSG00000162734 | PEA15         | 1.87 | 1.01E-03 |
| H3 Africa | ENSG00000196209 | SIRPB2        | 1.87 | 1.46E-03 |
| H3 Africa | ENSG00000146409 | SLC18B1       | 1.87 | 1.69E-04 |
| H3 Africa | ENSG00000248441 | LETR1         | 1.87 | 4.67E-03 |
| H3 Africa | ENSG00000125731 | SH2D3A        | 1.87 | 1.31E-03 |
| H3 Africa | ENSG00000188153 | COL4A5        | 1.87 | 1.89E-02 |
| H3 Africa | ENSG00000177337 | DLGAP1-AS1    | 1.87 | 1.43E-02 |
| H3 Africa | ENSG00000131831 | RAI2          | 1.87 | 1.17E-02 |
| H3 Africa | ENSG00000089157 | RPLP0         | 1.87 | 4.30E-02 |
| H3 Africa | ENSG00000198467 | TPM2          | 1.87 | 3.94E-02 |
| H3 Africa | ENSG00000274750 | H3C6          | 1.87 | 4.69E-02 |
| H3 Africa | ENSG00000133985 | TTC9          | 1.87 | 8.78E-03 |
| H3 Africa | ENSG00000235655 | H3P6          | 1.88 | 2.46E-02 |
| H3 Africa | ENSG00000087303 | NID2          | 1.88 | 4.13E-02 |
| H3 Africa | ENSG00000181322 | NME9          | 1.88 | 2.38E-04 |
| H3 Africa | ENSG00000171777 | RASGRP4       | 1.88 | 7.97E-04 |
| H3 Africa | ENSG00000159231 | CBR3          | 1.88 | 1.72E-03 |
| H3 Africa | ENSG00000165996 | HACD1         | 1.88 | 3.62E-03 |
| H3 Africa | ENSG00000128641 | MYO1B         | 1.88 | 5.91E-03 |
| H3 Africa | ENSG00000111801 | BTN3A3        | 1.88 | 1.16E-04 |
| H3 Africa | ENSG00000142856 | ITGB3BP       | 1.88 | 4.73E-02 |
| H3 Africa | ENSG00000251661 | RP11_326C311  | 1.88 | 2.23E-03 |
| H3 Africa | ENSG00000167992 | VWCE          | 1.88 | 2.91E-02 |
| H3 Africa | ENSG00000137962 | ARHGAP29      | 1.88 | 4.21E-04 |
| H3 Africa | ENSG00000172985 | SH3RF3        | 1.88 | 5.91E-03 |
| H3 Africa | ENSG00000280649 | AC245100.1    | 1.88 | 1.16E-02 |
| H3 Africa | ENSG00000241962 | RP11-111H13.1 | 1.88 | 7.53E-03 |
| H3 Africa | ENSG00000261116 | RP3_523K232   | 1.88 | 8.83E-04 |
| H3 Africa | ENSG00000167123 | CERCAM        | 1.88 | 6.17E-03 |
| H3 Africa | ENSG00000164088 | PPM1M         | 1.88 | 2.12E-03 |
| H3 Africa | ENSG00000101773 | RBBP8         | 1.88 | 4.27E-04 |
| H3 Africa | ENSG00000274712 | RP11_147L1315 | 1.88 | 7.05E-04 |
| H3 Africa | ENSG00000244313 | RP11_425L101  | 1.88 | 3.63E-02 |
| H3 Africa | ENSG00000155755 | TMEM237       | 1.88 | 2.71E-04 |
| H3 Africa | ENSG00000168546 | GFRA2         | 1.89 | 1.32E-03 |
| H3 Africa | ENSG00000224041 | IGKV3D-15     | 1.89 | 2.27E-03 |
| H3 Africa | ENSG00000164078 | MST1R         | 1.89 | 1.69E-03 |
| H3 Africa | ENSG00000230445 | LRRRC37A6P    | 1.89 | 2.37E-02 |
| H3 Africa | ENSG00000006747 | SCIN          | 1.89 | 7.57E-03 |
| H3 Africa | ENSG00000226067 | LINC00623     | 1.89 | 3.49E-03 |
| H3 Africa | ENSG00000226210 | WASH8P        | 1.89 | 4.26E-02 |
| H3 Africa | ENSG00000142279 | WTIP          | 1.89 | 7.65E-03 |
| H3 Africa | ENSG00000135205 | CCDC146       | 1.89 | 2.56E-02 |
| H3 Africa | ENSG00000127951 | FGL2          | 1.89 | 5.48E-03 |
| H3 Africa | ENSG00000124249 | KCNK15        | 1.89 | 2.27E-02 |
| H3 Africa | ENSG00000099250 | NRP1          | 1.89 | 3.35E-02 |
| H3 Africa | ENSG00000139174 | PRICKLE1      | 1.89 | 4.90E-03 |

|           |                 |             |      |          |
|-----------|-----------------|-------------|------|----------|
| H3 Africa | ENSG00000182162 | P2RY8       | 1.89 | 1.10E-02 |
| H3 Africa | ENSG00000057019 | DCBLD2      | 1.89 | 5.86E-03 |
| H3 Africa | ENSG00000213347 | MXD3        | 1.89 | 2.48E-02 |
| H3 Africa | ENSG00000162994 | CLHC1       | 1.89 | 2.10E-02 |
| H3 Africa | ENSG00000173947 | PIFO        | 1.89 | 2.99E-03 |
| H3 Africa | ENSG00000158805 | ZNF276      | 1.89 | 7.29E-03 |
| H3 Africa | ENSG00000235863 | B3GALT4     | 1.90 | 4.88E-03 |
| H3 Africa | ENSG00000101017 | CD40        | 1.90 | 9.90E-04 |
| H3 Africa | ENSG00000135723 | FHOD1       | 1.90 | 9.75E-04 |
| H3 Africa | ENSG00000224086 | PPM1F-AS1   | 1.90 | 2.22E-02 |
| H3 Africa | ENSG00000229152 | ANKRD10-IT1 | 1.90 | 3.52E-02 |
| H3 Africa | ENSG00000165646 | SLC18A2     | 1.90 | 8.43E-03 |
| H3 Africa | ENSG00000119636 | BBOF1       | 1.90 | 1.16E-04 |
| H3 Africa | ENSG00000188549 | CCDC9B      | 1.90 | 1.70E-02 |
| H3 Africa | ENSG00000163660 | CCNL1       | 1.90 | 1.80E-02 |
| H3 Africa | ENSG00000169851 | PCDH7       | 1.90 | 3.58E-03 |
| H3 Africa | ENSG00000227191 | TRGC2       | 1.90 | 3.01E-05 |
| H3 Africa | ENSG00000196345 | ZKSCAN7     | 1.90 | 1.22E-03 |
| H3 Africa | ENSG00000105246 | EBI3        | 1.90 | 2.27E-04 |
| H3 Africa | ENSG00000104140 | RHOV        | 1.90 | 5.65E-03 |
| H3 Africa | ENSG00000064666 | CNN2        | 1.90 | 3.42E-03 |
| H3 Africa | ENSG00000113721 | PDGFRB      | 1.90 | 7.07E-03 |
| H3 Africa | ENSG00000105810 | CDK6        | 1.91 | 1.66E-02 |
| H3 Africa | ENSG00000160963 | COL26A1     | 1.91 | 1.11E-02 |
| H3 Africa | ENSG00000154917 | RAB6B       | 1.91 | 4.63E-02 |
| H3 Africa | ENSG00000185338 | SOCS1       | 1.91 | 4.03E-04 |
| H3 Africa | ENSG00000128283 | CDC42EP1    | 1.91 | 1.73E-02 |
| H3 Africa | ENSG00000275221 | H2AC15      | 1.91 | 2.24E-03 |
| H3 Africa | ENSG00000077150 | NFKB2       | 1.91 | 3.04E-03 |
| H3 Africa | ENSG00000110777 | POU2AF1     | 1.91 | 4.60E-02 |
| H3 Africa | ENSG00000170545 | SMAGP       | 1.91 | 1.62E-03 |
| H3 Africa | ENSG00000138031 | ADCY3       | 1.91 | 1.87E-02 |
| H3 Africa | ENSG00000173083 | HPSE        | 1.91 | 1.02E-03 |
| H3 Africa | ENSG00000211956 | IGHV4-34    | 1.91 | 4.51E-02 |
| H3 Africa | ENSG00000112249 | ASCC3       | 1.91 | 1.27E-04 |
| H3 Africa | ENSG00000178695 | KCTD12      | 1.91 | 1.03E-02 |
| H3 Africa | ENSG00000182463 | TSHZ2       | 1.91 | 1.02E-02 |
| H3 Africa | ENSG00000074657 | ZNF532      | 1.91 | 7.77E-04 |
| H3 Africa | ENSG00000153814 | JAZF1       | 1.92 | 2.53E-03 |
| H3 Africa | ENSG00000105514 | RAB3D       | 1.92 | 7.07E-03 |
| H3 Africa | ENSG00000174791 | RIN1        | 1.92 | 6.62E-03 |
| H3 Africa | ENSG00000154978 | VOPP1       | 1.92 | 6.32E-04 |
| H3 Africa | ENSG00000233822 | H2BC15      | 1.92 | 1.18E-03 |
| H3 Africa | ENSG00000166503 | HDGFL3      | 1.92 | 2.85E-04 |
| H3 Africa | ENSG00000159618 | ADGRG5      | 1.92 | 5.63E-03 |
| H3 Africa | ENSG00000154240 | CEP112      | 1.92 | 4.16E-03 |
| H3 Africa | ENSG00000130038 | CRACR2A     | 1.92 | 1.46E-02 |
| H3 Africa | ENSG00000118997 | DNAH7       | 1.92 | 1.20E-03 |
| H3 Africa | ENSG00000135253 | KCP         | 1.92 | 4.72E-03 |
| H3 Africa | ENSG00000164830 | OXR1        | 1.92 | 1.44E-03 |
| H3 Africa | ENSG00000086300 | SNX10       | 1.92 | 3.38E-03 |
| H3 Africa | ENSG00000145365 | TIFA        | 1.92 | 8.52E-04 |
| H3 Africa | ENSG00000236609 | ZNF853      | 1.92 | 2.08E-03 |

|           |                 |              |      |          |
|-----------|-----------------|--------------|------|----------|
| H3 Africa | ENSG00000223804 | CH17_472G232 | 1.92 | 3.75E-03 |
| H3 Africa | ENSG00000100558 | PLEK2        | 1.92 | 6.28E-03 |
| H3 Africa | ENSG00000213553 | RPLP0P6      | 1.92 | 1.75E-02 |
| H3 Africa | ENSG00000175455 | CCDC14       | 1.92 | 8.60E-03 |
| H3 Africa | ENSG00000109436 | TBC1D9       | 1.92 | 1.89E-03 |
| H3 Africa | ENSG00000124224 | PPP4R1L      | 1.92 | 1.27E-02 |
| H3 Africa | ENSG00000170921 | TANC2        | 1.92 | 1.38E-03 |
| H3 Africa | ENSG00000120889 | TNFRSF10B    | 1.92 | 4.68E-04 |
| H3 Africa | ENSG00000175899 | A2M          | 1.93 | 3.61E-02 |
| H3 Africa | ENSG00000099331 | MYO9B        | 1.93 | 3.50E-05 |
| H3 Africa | ENSG00000243649 | CFB          | 1.93 | 4.89E-03 |
| H3 Africa | ENSG00000204540 | PSORS1C1     | 1.93 | 2.95E-03 |
| H3 Africa | ENSG00000163584 | RPL22L1      | 1.93 | 4.21E-03 |
| H3 Africa | ENSG00000184349 | EFNA5        | 1.93 | 3.96E-02 |
| H3 Africa | ENSG00000206341 | HLA-H        | 1.93 | 1.08E-02 |
| H3 Africa | ENSG00000154640 | BTG3         | 1.93 | 1.02E-02 |
| H3 Africa | ENSG00000080573 | COL5A3       | 1.93 | 3.25E-03 |
| H3 Africa | ENSG00000185291 | IL3RA        | 1.93 | 5.65E-04 |
| H3 Africa | ENSG00000084731 | KIF3C        | 1.93 | 1.72E-02 |
| H3 Africa | ENSG00000213903 | LTB4R        | 1.93 | 3.75E-03 |
| H3 Africa | ENSG00000033867 | SLC4A7       | 1.93 | 2.71E-03 |
| H3 Africa | ENSG00000154548 | SRSF12       | 1.93 | 1.50E-03 |
| H3 Africa | ENSG00000276410 | H2BC3        | 1.93 | 1.95E-03 |
| H3 Africa | ENSG00000158987 | RAPGEF6      | 1.93 | 3.22E-04 |
| H3 Africa | ENSG00000181847 | TIGIT        | 1.93 | 3.53E-04 |
| H3 Africa | ENSG00000146858 | ZC3HAV1L     | 1.93 | 1.09E-02 |
| H3 Africa | ENSG00000243829 | CTB_33G101   | 1.94 | 3.60E-02 |
| H3 Africa | ENSG00000137628 | DDX60        | 1.94 | 1.11E-03 |
| H3 Africa | ENSG00000116741 | RGS2         | 1.94 | 1.91E-02 |
| H3 Africa | ENSG00000205078 | SYCE1L       | 1.94 | 5.80E-03 |
| H3 Africa | ENSG00000163840 | DTX3L        | 1.94 | 8.59E-03 |
| H3 Africa | ENSG00000197948 | FCHSD1       | 1.94 | 1.16E-03 |
| H3 Africa | ENSG00000239998 | LILRA2       | 1.94 | 6.80E-04 |
| H3 Africa | ENSG00000169071 | ROR2         | 1.94 | 6.63E-03 |
| H3 Africa | ENSG00000074590 | NUAK1        | 1.94 | 2.98E-03 |
| H3 Africa | ENSG00000105854 | PON2         | 1.94 | 1.74E-04 |
| H3 Africa | ENSG00000081923 | ATP8B1       | 1.94 | 1.85E-02 |
| H3 Africa | ENSG00000152804 | HHEX         | 1.94 | 5.54E-04 |
| H3 Africa | ENSG00000155980 | KIF5A        | 1.94 | 1.18E-03 |
| H3 Africa | ENSG00000157193 | LRP8         | 1.94 | 3.74E-04 |
| H3 Africa | ENSG00000125637 | PSD4         | 1.94 | 8.31E-05 |
| H3 Africa | ENSG00000064932 | SBNO2        | 1.94 | 1.51E-04 |
| H3 Africa | ENSG00000151967 | SCHIP1       | 1.94 | 1.43E-02 |
| H3 Africa | ENSG00000117122 | MFAP2        | 1.95 | 2.92E-03 |
| H3 Africa | ENSG00000120278 | PLEKHG1      | 1.95 | 8.40E-04 |
| H3 Africa | ENSG00000197299 | BLM          | 1.95 | 3.57E-04 |
| H3 Africa | ENSG00000179144 | GIMAP7       | 1.95 | 7.88E-04 |
| H3 Africa | ENSG00000196155 | PLEKHG4      | 1.95 | 1.56E-03 |
| H3 Africa | ENSG00000140367 | UBE2Q2       | 1.95 | 7.71E-04 |
| H3 Africa | ENSG00000185275 | CD24P4       | 1.95 | 3.03E-04 |
| H3 Africa | ENSG00000261971 | MMP25-AS1    | 1.95 | 2.51E-03 |
| H3 Africa | ENSG00000024422 | EHD2         | 1.95 | 4.52E-02 |
| H3 Africa | ENSG00000253485 | PCDHGA5      | 1.95 | 6.88E-04 |

|           |                 |                          |      |          |
|-----------|-----------------|--------------------------|------|----------|
| H3 Africa | ENSG00000178429 | RPS3AP5                  | 1.95 | 4.94E-02 |
| H3 Africa | ENSG00000006634 | DBF4                     | 1.95 | 4.80E-04 |
| H3 Africa | ENSG00000102452 | NALCN                    | 1.95 | 2.23E-03 |
| H3 Africa | ENSG00000136378 | ADAMTS7                  | 1.95 | 6.50E-04 |
| H3 Africa | ENSG00000171208 | NETO2                    | 1.95 | 4.36E-03 |
| H3 Africa | ENSG00000115523 | GNLY                     | 1.95 | 1.54E-02 |
| H3 Africa | ENSG00000249715 | FER1L5                   | 1.96 | 4.57E-03 |
| H3 Africa | ENSG00000204381 | LAYN                     | 1.96 | 1.97E-02 |
| H3 Africa | ENSG00000128833 | MYO5C                    | 1.96 | 8.20E-03 |
| H3 Africa | ENSG00000281357 | ARRDC3-AS1               | 1.96 | 9.50E-03 |
| H3 Africa | ENSG00000146232 | NFKBIE                   | 1.96 | 2.72E-03 |
| H3 Africa | ENSG00000173156 | RHOD                     | 1.96 | 1.71E-02 |
| H3 Africa | ENSG00000141574 | SECTM1                   | 1.96 | 4.28E-02 |
| H3 Africa | ENSG00000174125 | TLR1                     | 1.96 | 1.55E-03 |
| H3 Africa | ENSG00000133107 | TRPC4                    | 1.96 | 3.37E-03 |
| H3 Africa | ENSG00000108798 | ABI3                     | 1.96 | 6.92E-04 |
| H3 Africa | ENSG00000126214 | KLC1                     | 1.96 | 3.03E-03 |
| H3 Africa | ENSG00000166963 | MAP1A                    | 1.96 | 4.13E-02 |
| H3 Africa | ENSG00000171320 | ESCO2                    | 1.96 | 8.71E-03 |
| H3 Africa | ENSG00000120093 | HOXB3                    | 1.96 | 4.24E-03 |
| H3 Africa | ENSG00000101236 | RNF24                    | 1.96 | 1.08E-02 |
| H3 Africa | ENSG00000152229 | PSTPIP2                  | 1.96 | 3.40E-03 |
| H3 Africa | ENSG00000217130 | RP3_375P92               | 1.96 | 1.39E-02 |
| H3 Africa | ENSG00000179542 | SLITRK4                  | 1.96 | 3.75E-02 |
| H3 Africa | ENSG00000165923 | AGBL2                    | 1.96 | 2.76E-03 |
| H3 Africa | ENSG00000142959 | BEST4                    | 1.96 | 2.45E-04 |
| H3 Africa | ENSG00000168268 | NT5DC2                   | 1.96 | 2.88E-04 |
| H3 Africa | ENSG00000243701 | DUBR                     | 1.97 | 4.28E-03 |
| H3 Africa | ENSG00000263528 | IKBKE                    | 1.97 | 2.21E-03 |
| H3 Africa | ENSG00000274020 | LINC01138                | 1.97 | 2.34E-03 |
| H3 Africa | ENSG00000133640 | LRRIQ1                   | 1.97 | 4.03E-04 |
| H3 Africa | ENSG00000114346 | ECT2                     | 1.97 | 5.39E-03 |
| H3 Africa | ENSG00000260244 | RP11_588K222             | 1.97 | 4.85E-03 |
| H3 Africa | ENSG00000118193 | KIF14                    | 1.97 | 8.42E-03 |
| H3 Africa | ENSG00000267128 | RNF157-AS1               | 1.97 | 7.46E-03 |
| H3 Africa | ENSG00000187554 | TLR5                     | 1.97 | 6.46E-04 |
| H3 Africa | ENSG00000183765 | CHEK2                    | 1.97 | 3.37E-04 |
| H3 Africa | ENSG00000176658 | MYO1D                    | 1.97 | 1.26E-03 |
| H3 Africa | ENSG00000134853 | PDGFRA                   | 1.97 | 2.78E-02 |
| H3 Africa | ENSG00000270231 | NBPF10 (includes others) | 1.98 | 1.09E-03 |
| H3 Africa | ENSG00000162924 | REL                      | 1.98 | 7.32E-05 |
| H3 Africa | ENSG00000079102 | RUNX1T1                  | 1.98 | 8.08E-03 |
| H3 Africa | ENSG00000064692 | SNCAIP                   | 1.98 | 4.34E-03 |
| H3 Africa | ENSG00000171159 | BBLN                     | 1.98 | 3.38E-03 |
| H3 Africa | ENSG00000170608 | FOXA3                    | 1.98 | 5.86E-04 |
| H3 Africa | ENSG00000214013 | GANC                     | 1.98 | 5.73E-04 |
| H3 Africa | ENSG00000172197 | MBOAT1                   | 1.98 | 3.99E-03 |
| H3 Africa | ENSG00000085276 | MECOM                    | 1.98 | 1.75E-03 |
| H3 Africa | ENSG00000274767 | AC1310563                | 1.98 | 8.92E-03 |
| H3 Africa | ENSG00000105369 | CD79A                    | 1.98 | 5.15E-03 |
| H3 Africa | ENSG00000108405 | P2RX1                    | 1.98 | 3.74E-04 |
| H3 Africa | ENSG00000145819 | ARHGAP26                 | 1.98 | 2.12E-03 |
| H3 Africa | ENSG00000164649 | CDCA7L                   | 1.98 | 7.87E-04 |

|           |                 |                   |      |          |
|-----------|-----------------|-------------------|------|----------|
| H3 Africa | ENSG00000003147 | ICA1              | 1.98 | 1.87E-03 |
| H3 Africa | ENSG00000165359 | INTS6L            | 1.98 | 2.04E-02 |
| H3 Africa | ENSG00000254535 | PABPC4L           | 1.98 | 1.35E-03 |
| H3 Africa | ENSG00000152952 | PLOD2             | 1.98 | 1.47E-05 |
| H3 Africa | ENSG00000278463 | H2AC4             | 1.98 | 8.69E-03 |
| H3 Africa | ENSG00000100968 | NFATC4            | 1.98 | 2.57E-02 |
| H3 Africa | ENSG00000079689 | SCGN              | 1.98 | 9.37E-03 |
| H3 Africa | ENSG00000100300 | TSPO              | 1.98 | 3.54E-03 |
| H3 Africa | ENSG00000116584 | ARHGEF2           | 1.98 | 3.35E-05 |
| H3 Africa | ENSG00000120820 | GLT8D2            | 1.98 | 1.18E-02 |
| H3 Africa | ENSG00000095015 | MAP3K1            | 1.98 | 4.96E-05 |
| H3 Africa | ENSG00000266947 | RP11_799D44       | 1.98 | 5.00E-04 |
| H3 Africa | ENSG00000168028 | RPSA              | 1.98 | 1.46E-02 |
| H3 Africa | ENSG00000174740 | PABPC5            | 1.98 | 8.26E-04 |
| H3 Africa | ENSG00000185985 | SLITRK2           | 1.98 | 2.22E-02 |
| H3 Africa | ENSG00000104549 | SQLE              | 1.98 | 3.78E-02 |
| H3 Africa | ENSG00000110031 | LPXN              | 1.98 | 2.61E-05 |
| H3 Africa | ENSG00000198832 | SELENOM           | 1.99 | 1.39E-02 |
| H3 Africa | ENSG00000137501 | SYTL2             | 1.99 | 9.36E-04 |
| H3 Africa | ENSG00000196440 | ARMCX4            | 1.99 | 8.69E-03 |
| H3 Africa | ENSG00000224081 | SLC44A3-AS1       | 1.99 | 3.03E-03 |
| H3 Africa | ENSG00000206149 | HERC2P9           | 1.99 | 1.50E-02 |
| H3 Africa | ENSG00000119403 | PHF19             | 1.99 | 3.88E-04 |
| H3 Africa | ENSG00000090924 | PLEKHG2           | 1.99 | 6.53E-03 |
| H3 Africa | ENSG00000223509 | RP11_632K207      | 1.99 | 3.99E-02 |
| H3 Africa | ENSG00000126458 | RRAS              | 1.99 | 1.23E-02 |
| H3 Africa | ENSG00000106952 | TNFSF8            | 1.99 | 1.93E-04 |
| H3 Africa | ENSG00000026950 | BTN3A1            | 1.99 | 6.14E-04 |
| H3 Africa | ENSG00000212464 | SNORA12           | 1.99 | 4.13E-02 |
| H3 Africa | ENSG00000186567 | CEACAM19          | 1.99 | 6.28E-03 |
| H3 Africa | ENSG00000171385 | KCND3             | 1.99 | 1.46E-02 |
| H3 Africa | ENSG00000225200 | AB01944129        | 1.99 | 4.76E-03 |
| H3 Africa | ENSG00000102057 | KCND1             | 1.99 | 1.41E-04 |
| H3 Africa | ENSG00000186185 | KIF18B            | 1.99 | 3.92E-03 |
| H3 Africa | ENSG00000197989 | SNHG12            | 1.99 | 4.01E-02 |
| H3 Africa | ENSG00000184292 | TACSTD2           | 1.99 | 3.07E-02 |
| H3 Africa | ENSG00000182986 | ZNF320            | 1.99 | 2.79E-02 |
| H3 Africa | ENSG00000211964 | IGHV3-48          | 2.00 | 9.51E-04 |
| H3 Africa | ENSG00000147119 | CHST7             | 2.00 | 4.09E-03 |
| H3 Africa | ENSG00000249859 | PVT1              | 2.00 | 8.51E-04 |
| H3 Africa | ENSG00000189334 | S100A14           | 2.00 | 5.80E-03 |
| H3 Africa | ENSG00000120875 | DUSP4             | 2.00 | 1.83E-04 |
| H3 Africa | ENSG00000103489 | XYLT1             | 2.00 | 1.04E-02 |
| H3 Africa | ENSG00000094804 | CDC6              | 2.00 | 3.74E-03 |
| H3 Africa | ENSG00000207445 | SNORD15B          | 2.00 | 6.74E-03 |
| H3 Africa | ENSG00000004777 | ARHGAP33          | 2.00 | 1.16E-02 |
| H3 Africa | ENSG00000262246 | CORO7/CORO7-PAM16 | 2.00 | 2.89E-04 |
| H3 Africa | ENSG00000041353 | RAB27B            | 2.00 | 1.20E-03 |
| H3 Africa | ENSG00000109854 | HTATIP2           | 2.01 | 2.98E-02 |
| H3 Africa | ENSG00000179241 | LDLRAD3           | 2.01 | 3.52E-03 |
| H3 Africa | ENSG00000261175 | LINC02188         | 2.01 | 1.67E-03 |
| H3 Africa | ENSG00000010030 | ETV7              | 2.01 | 4.70E-04 |
| H3 Africa | ENSG00000165178 | NCF1C             | 2.01 | 1.64E-05 |

|           |                 |                          |      |          |
|-----------|-----------------|--------------------------|------|----------|
| H3 Africa | ENSG00000162194 | LBHD1                    | 2.01 | 1.19E-02 |
| H3 Africa | ENSG00000161960 | EIF4A1                   | 2.01 | 1.03E-02 |
| H3 Africa | ENSG00000160883 | HK3                      | 2.01 | 1.60E-03 |
| H3 Africa | ENSG00000137821 | LRRC49                   | 2.01 | 2.98E-04 |
| H3 Africa | ENSG00000158163 | DZIP1L                   | 2.01 | 2.71E-03 |
| H3 Africa | ENSG00000112379 | ARFGEF3                  | 2.01 | 2.72E-02 |
| H3 Africa | ENSG00000188060 | RAB42                    | 2.01 | 3.74E-04 |
| H3 Africa | ENSG00000128245 | YWHAH                    | 2.01 | 1.92E-03 |
| H3 Africa | ENSG00000077984 | CST7                     | 2.02 | 1.97E-03 |
| H3 Africa | ENSG00000164171 | ITGA2                    | 2.02 | 6.42E-03 |
| H3 Africa | ENSG00000123342 | MMP19                    | 2.02 | 1.33E-04 |
| H3 Africa | ENSG00000113205 | PCDHB3                   | 2.02 | 1.61E-02 |
| H3 Africa | ENSG00000101134 | DOK5                     | 2.02 | 1.49E-03 |
| H3 Africa | ENSG00000137496 | IL18BP                   | 2.02 | 1.53E-03 |
| H3 Africa | ENSG00000162825 | NBPF10 (includes others) | 2.02 | 1.13E-03 |
| H3 Africa | ENSG00000147041 | SYTL5                    | 2.02 | 2.41E-02 |
| H3 Africa | ENSG00000113758 | DBN1                     | 2.02 | 2.36E-03 |
| H3 Africa | ENSG00000091844 | RGS17                    | 2.02 | 2.51E-04 |
| H3 Africa | ENSG00000091972 | CD200                    | 2.02 | 1.25E-03 |
| H3 Africa | ENSG00000111860 | CEP85L                   | 2.02 | 8.28E-04 |
| H3 Africa | ENSG00000141449 | GREB1L                   | 2.02 | 1.21E-02 |
| H3 Africa | ENSG00000204103 | MAFB                     | 2.02 | 5.86E-03 |
| H3 Africa | ENSG00000228526 | MIR34AHG                 | 2.02 | 6.19E-03 |
| H3 Africa | ENSG00000138642 | HERC6                    | 2.02 | 1.23E-02 |
| H3 Africa | ENSG00000104723 | TUSC3                    | 2.02 | 1.89E-02 |
| H3 Africa | ENSG00000115590 | IL1R2                    | 2.03 | 8.47E-04 |
| H3 Africa | ENSG00000181264 | TLCD5                    | 2.03 | 3.88E-04 |
| H3 Africa | ENSG00000187210 | GCNT1                    | 2.03 | 6.41E-04 |
| H3 Africa | ENSG00000198771 | RCSD1                    | 2.03 | 1.21E-03 |
| H3 Africa | ENSG00000204525 | HLA-C                    | 2.03 | 3.37E-02 |
| H3 Africa | ENSG00000196218 | RYR1                     | 2.03 | 1.54E-03 |
| H3 Africa | ENSG00000215302 | CTD_3092A111             | 2.03 | 5.17E-03 |
| H3 Africa | ENSG00000150961 | SEC24D                   | 2.03 | 2.76E-03 |
| H3 Africa | ENSG00000140525 | FANCI                    | 2.03 | 1.05E-03 |
| H3 Africa | ENSG00000134253 | TRIM45                   | 2.03 | 3.85E-03 |
| H3 Africa | ENSG00000143469 | SYT14                    | 2.03 | 4.52E-02 |
| H3 Africa | ENSG00000141448 | GATA6                    | 2.03 | 1.84E-03 |
| H3 Africa | ENSG00000100450 | GZMH                     | 2.03 | 6.50E-04 |
| H3 Africa | ENSG00000124610 | H1-1                     | 2.03 | 4.60E-03 |
| H3 Africa | ENSG00000261801 | LOXL1-AS1                | 2.03 | 3.88E-03 |
| H3 Africa | ENSG00000135549 | PKIB                     | 2.03 | 7.56E-03 |
| H3 Africa | ENSG00000225783 | MIAT                     | 2.04 | 5.69E-05 |
| H3 Africa | ENSG00000167693 | NXN                      | 2.04 | 1.46E-03 |
| H3 Africa | ENSG00000250305 | TRMT9B                   | 2.04 | 2.09E-03 |
| H3 Africa | ENSG00000178498 | DTX3                     | 2.04 | 1.79E-03 |
| H3 Africa | ENSG00000162636 | FAM102B                  | 2.04 | 4.78E-05 |
| H3 Africa | ENSG00000187634 | SAMD11                   | 2.04 | 1.56E-02 |
| H3 Africa | ENSG00000166401 | SERPINB8                 | 2.04 | 1.32E-03 |
| H3 Africa | ENSG00000150594 | ADRA2A                   | 2.04 | 2.17E-02 |
| H3 Africa | ENSG00000229124 | VIM-AS1                  | 2.04 | 2.29E-04 |
| H3 Africa | ENSG00000161921 | CXCL16                   | 2.04 | 1.92E-02 |
| H3 Africa | ENSG00000205730 | ITPRIPL2                 | 2.04 | 4.93E-03 |
| H3 Africa | ENSG00000225746 | MEG8                     | 2.04 | 4.26E-02 |



|           |                 |              |      |          |
|-----------|-----------------|--------------|------|----------|
| H3 Africa | ENSG00000142731 | PLK4         | 2.04 | 8.58E-04 |
| H3 Africa | ENSG00000279166 | RP11_107E53  | 2.04 | 1.31E-02 |
| H3 Africa | ENSG00000182179 | UBA7         | 2.04 | 5.76E-05 |
| H3 Africa | ENSG00000068489 | PRR11        | 2.05 | 1.88E-03 |
| H3 Africa | ENSG00000198039 | ZNF273       | 2.05 | 1.52E-04 |
| H3 Africa | ENSG00000173715 | C11orf80     | 2.05 | 2.66E-03 |
| H3 Africa | ENSG00000122986 | HVCN1        | 2.05 | 2.25E-04 |
| H3 Africa | ENSG00000132321 | IQCA1        | 2.05 | 6.21E-03 |
| H3 Africa | ENSG00000174652 | ZNF266       | 2.05 | 2.58E-03 |
| H3 Africa | ENSG00000185495 | SEPTIN7P13   | 2.05 | 2.74E-02 |
| H3 Africa | ENSG00000111452 | ADGRD1       | 2.05 | 8.49E-03 |
| H3 Africa | ENSG00000116793 | PHTF1        | 2.05 | 3.67E-05 |
| H3 Africa | ENSG00000169908 | TM4SF1       | 2.05 | 3.97E-03 |
| H3 Africa | ENSG00000130589 | HELZ2        | 2.05 | 7.76E-03 |
| H3 Africa | ENSG00000166289 | PLEKHF1      | 2.05 | 2.88E-04 |
| H3 Africa | ENSG00000123473 | STIL         | 2.05 | 1.15E-03 |
| H3 Africa | ENSG00000090889 | KIF4A        | 2.05 | 2.40E-02 |
| H3 Africa | ENSG00000107719 | PALD1        | 2.05 | 1.21E-03 |
| H3 Africa | ENSG00000172578 | KLHL6        | 2.06 | 6.99E-03 |
| H3 Africa | ENSG00000171488 | LRRC8C       | 2.06 | 1.48E-04 |
| H3 Africa | ENSG00000254726 | MEX3A        | 2.06 | 4.61E-03 |
| H3 Africa | ENSG00000151725 | CENPU        | 2.06 | 4.34E-03 |
| H3 Africa | ENSG00000181036 | FCRL6        | 2.06 | 1.99E-05 |
| H3 Africa | ENSG00000165259 | HDX          | 2.06 | 7.64E-04 |
| H3 Africa | ENSG00000214331 | PDPR2P       | 2.06 | 1.04E-02 |
| H3 Africa | ENSG00000173320 | STOX2        | 2.06 | 1.01E-02 |
| H3 Africa | ENSG00000003096 | KLHL13       | 2.06 | 8.67E-04 |
| H3 Africa | ENSG00000131435 | PDLIM4       | 2.06 | 1.72E-03 |
| H3 Africa | ENSG00000064300 | NGFR         | 2.06 | 7.08E-03 |
| H3 Africa | ENSG00000120693 | SMAD9        | 2.06 | 3.27E-02 |
| H3 Africa | ENSG00000196628 | TCF4         | 2.06 | 8.35E-05 |
| H3 Africa | ENSG00000204262 | COL5A2       | 2.06 | 1.49E-04 |
| H3 Africa | ENSG00000130475 | FCHO1        | 2.06 | 3.32E-04 |
| H3 Africa | ENSG00000184986 | TMEM121      | 2.06 | 4.52E-03 |
| H3 Africa | ENSG00000173852 | DPY19L1      | 2.07 | 3.49E-05 |
| H3 Africa | ENSG00000113248 | PCDHB15      | 2.07 | 1.86E-03 |
| H3 Africa | ENSG00000126785 | RHOJ         | 2.07 | 2.34E-03 |
| H3 Africa | ENSG00000156711 | MAPK13       | 2.07 | 1.54E-03 |
| H3 Africa | ENSG00000180801 | ARSJ         | 2.07 | 1.14E-03 |
| H3 Africa | ENSG00000168646 | AXIN2        | 2.07 | 2.42E-03 |
| H3 Africa | ENSG00000240342 | RPS2P5       | 2.07 | 1.58E-03 |
| H3 Africa | ENSG00000156802 | ATAD2        | 2.07 | 4.77E-04 |
| H3 Africa | ENSG00000139629 | GALNT6       | 2.07 | 6.32E-03 |
| H3 Africa | ENSG00000119397 | CNTRL        | 2.07 | 1.69E-04 |
| H3 Africa | ENSG00000127955 | GNAI1        | 2.07 | 8.79E-03 |
| H3 Africa | ENSG00000121858 | TNFSF10      | 2.07 | 1.63E-02 |
| H3 Africa | ENSG00000248334 | WHAMMP2      | 2.07 | 1.24E-03 |
| H3 Africa | ENSG00000152076 | CCDC74B      | 2.08 | 1.15E-03 |
| H3 Africa | ENSG00000110203 | FOLR3        | 2.08 | 4.36E-02 |
| H3 Africa | ENSG00000214425 | LRRC37A4P    | 2.08 | 1.79E-02 |
| H3 Africa | ENSG00000185737 | NRG3         | 2.08 | 9.93E-04 |
| H3 Africa | ENSG00000259275 | RP11_522B153 | 2.08 | 1.17E-02 |
| H3 Africa | ENSG00000123096 | SSPN         | 2.08 | 5.56E-04 |

|           |                 |            |      |          |
|-----------|-----------------|------------|------|----------|
| H3 Africa | ENSG00000101255 | TRIB3      | 2.08 | 1.79E-04 |
| H3 Africa | ENSG00000060138 | YBX3       | 2.08 | 4.17E-05 |
| H3 Africa | ENSG00000215374 | FAM66B     | 2.08 | 1.33E-03 |
| H3 Africa | ENSG00000129534 | MIS18BP1   | 2.08 | 1.11E-04 |
| H3 Africa | ENSG00000197905 | TEAD4      | 2.08 | 1.09E-02 |
| H3 Africa | ENSG00000183160 | TMEM119    | 2.08 | 1.93E-03 |
| H3 Africa | ENSG00000123416 | TUBA1B     | 2.08 | 6.86E-04 |
| H3 Africa | ENSG00000243811 | APOBEC3D   | 2.08 | 1.90E-03 |
| H3 Africa | ENSG00000142694 | EVA1B      | 2.08 | 3.37E-03 |
| H3 Africa | ENSG00000173193 | PARP14     | 2.08 | 3.75E-04 |
| H3 Africa | ENSG00000075618 | FSCN1      | 2.09 | 7.21E-03 |
| H3 Africa | ENSG00000142621 | FHAD1      | 2.09 | 3.70E-04 |
| H3 Africa | ENSG00000172986 | GXYLT2     | 2.09 | 6.02E-03 |
| H3 Africa | ENSG00000123609 | NMI        | 2.09 | 2.20E-05 |
| H3 Africa | ENSG00000281571 | AC241585.1 | 2.09 | 1.23E-03 |
| H3 Africa | ENSG00000109738 | GLRB       | 2.09 | 1.03E-02 |
| H3 Africa | ENSG00000183943 | PRKX       | 2.09 | 5.17E-03 |
| H3 Africa | ENSG00000135362 | PRR5L      | 2.09 | 6.33E-04 |
| H3 Africa | ENSG00000212402 | SNORA74B   | 2.09 | 2.46E-02 |
| H3 Africa | ENSG00000105372 | RPS19      | 2.09 | 3.91E-03 |
| H3 Africa | ENSG00000160188 | RSPH1      | 2.09 | 1.09E-02 |
| H3 Africa | ENSG00000168758 | SEMA4C     | 2.09 | 1.06E-04 |
| H3 Africa | ENSG00000120868 | APAF1      | 2.10 | 7.07E-05 |
| H3 Africa | ENSG00000144893 | MED12L     | 2.10 | 6.46E-03 |
| H3 Africa | ENSG00000121895 | TMEM156    | 2.10 | 9.51E-04 |
| H3 Africa | ENSG00000154380 | ENAH       | 2.10 | 5.08E-04 |
| H3 Africa | ENSG00000163874 | ZC3H12A    | 2.10 | 1.18E-03 |
| H3 Africa | ENSG00000234741 | GAS5       | 2.10 | 3.93E-02 |
| H3 Africa | ENSG00000118292 | C1orf54    | 2.10 | 1.01E-02 |
| H3 Africa | ENSG00000151882 | CCL28      | 2.10 | 6.42E-03 |
| H3 Africa | ENSG00000154639 | CXADR      | 2.10 | 2.10E-02 |
| H3 Africa | ENSG00000024526 | DEPDC1     | 2.10 | 2.65E-02 |
| H3 Africa | ENSG00000177409 | SAMD9L     | 2.10 | 9.34E-05 |
| H3 Africa | ENSG00000115594 | IL1R1      | 2.10 | 2.93E-04 |
| H3 Africa | ENSG00000177410 | ZFAS1      | 2.10 | 2.90E-03 |
| H3 Africa | ENSG00000137478 | FCHSD2     | 2.10 | 7.92E-06 |
| H3 Africa | ENSG00000092969 | TGFB2      | 2.10 | 1.39E-02 |
| H3 Africa | ENSG00000143341 | HMCN1      | 2.10 | 1.80E-03 |
| H3 Africa | ENSG00000223960 | CHROMR     | 2.11 | 9.85E-05 |
| H3 Africa | ENSG00000254838 | GVINP1     | 2.11 | 6.59E-04 |
| H3 Africa | ENSG00000114115 | RBP1       | 2.11 | 1.23E-03 |
| H3 Africa | ENSG00000135094 | SDS        | 2.11 | 1.28E-03 |
| H3 Africa | ENSG00000165309 | ARMC3      | 2.11 | 1.37E-02 |
| H3 Africa | ENSG00000181885 | CLDN7      | 2.11 | 1.40E-03 |
| H3 Africa | ENSG00000179277 | MEIS3P1    | 2.11 | 1.57E-04 |
| H3 Africa | ENSG00000148426 | PROSER2    | 2.11 | 3.84E-04 |
| H3 Africa | ENSG00000139725 | RHOF       | 2.11 | 7.17E-04 |
| H3 Africa | ENSG00000137691 | CFAP300    | 2.11 | 4.47E-04 |
| H3 Africa | ENSG00000197705 | KLHL14     | 2.11 | 2.50E-03 |
| H3 Africa | ENSG00000152253 | SPC25      | 2.11 | 2.56E-05 |
| H3 Africa | ENSG00000081189 | MEF2C      | 2.11 | 1.02E-04 |
| H3 Africa | ENSG00000145779 | TNFAIP8    | 2.11 | 3.18E-05 |
| H3 Africa | ENSG00000213988 | ZNF90      | 2.11 | 2.15E-03 |

|           |                 |              |      |          |
|-----------|-----------------|--------------|------|----------|
| H3 Africa | ENSG00000241839 | PLEKHO2      | 2.11 | 2.31E-04 |
| H3 Africa | ENSG00000080293 | SCTR         | 2.11 | 2.35E-03 |
| H3 Africa | ENSG00000138829 | FBN2         | 2.12 | 1.81E-03 |
| H3 Africa | ENSG00000115339 | GALNT3       | 2.12 | 1.25E-04 |
| H3 Africa | ENSG00000272419 | LINC01145    | 2.12 | 5.01E-04 |
| H3 Africa | ENSG00000136531 | SCN2A        | 2.12 | 2.81E-02 |
| H3 Africa | ENSG00000079263 | SP140        | 2.12 | 5.45E-05 |
| H3 Africa | ENSG00000116001 | TIA1         | 2.12 | 1.25E-02 |
| H3 Africa | ENSG00000169258 | GPRIN1       | 2.12 | 4.25E-03 |
| H3 Africa | ENSG00000272533 | SNORA28      | 2.12 | 4.21E-02 |
| H3 Africa | ENSG00000172175 | MALT1        | 2.12 | 5.03E-04 |
| H3 Africa | ENSG00000111907 | TPD52L1      | 2.12 | 4.15E-04 |
| H3 Africa | ENSG00000100342 | APOL1        | 2.12 | 1.89E-02 |
| H3 Africa | ENSG00000174175 | SELP         | 2.12 | 1.53E-02 |
| H3 Africa | ENSG00000162946 | DISC1        | 2.12 | 1.69E-04 |
| H3 Africa | ENSG00000168675 | LDLRAD4      | 2.12 | 2.53E-03 |
| H3 Africa | ENSG00000198879 | SFMBT2       | 2.12 | 3.48E-05 |
| H3 Africa | ENSG00000170624 | SGCD         | 2.12 | 3.84E-04 |
| H3 Africa | ENSG00000143507 | DUSP10       | 2.13 | 3.90E-04 |
| H3 Africa | ENSG00000163106 | HPGDS        | 2.13 | 5.64E-04 |
| H3 Africa | ENSG00000228623 | ZNF883       | 2.13 | 7.76E-03 |
| H3 Africa | ENSG00000187796 | CARD9        | 2.13 | 4.03E-04 |
| H3 Africa | ENSG00000132470 | ITGB4        | 2.13 | 8.69E-03 |
| H3 Africa | ENSG00000214870 | LINC02981    | 2.13 | 1.84E-04 |
| H3 Africa | ENSG00000099256 | PRTFDC1      | 2.13 | 1.85E-03 |
| H3 Africa | ENSG00000082497 | SERTAD4      | 2.13 | 8.98E-04 |
| H3 Africa | ENSG00000106100 | NOD1         | 2.13 | 2.14E-05 |
| H3 Africa | ENSG00000242779 | ZNF702P      | 2.13 | 7.97E-04 |
| H3 Africa | ENSG00000215068 | AC025171.1   | 2.13 | 1.02E-03 |
| H3 Africa | ENSG00000235162 | C12orf75     | 2.13 | 5.97E-05 |
| H3 Africa | ENSG00000138722 | MMRN1        | 2.13 | 3.04E-02 |
| H3 Africa | ENSG00000135749 | PCNX2        | 2.13 | 2.07E-04 |
| H3 Africa | ENSG00000184489 | PTP4A3       | 2.13 | 3.34E-03 |
| H3 Africa | ENSG00000122735 | DNAI1        | 2.13 | 3.93E-04 |
| H3 Africa | ENSG00000139926 | FRMD6        | 2.13 | 1.04E-04 |
| H3 Africa | ENSG00000164949 | GEM          | 2.13 | 1.47E-02 |
| H3 Africa | ENSG00000109452 | INPP4B       | 2.13 | 3.76E-04 |
| H3 Africa | ENSG00000162520 | SYNC         | 2.13 | 1.23E-02 |
| H3 Africa | ENSG00000187741 | FANCA        | 2.14 | 1.55E-03 |
| H3 Africa | ENSG00000165046 | LETM2        | 2.14 | 8.88E-04 |
| H3 Africa | ENSG00000106484 | MEST         | 2.14 | 2.40E-02 |
| H3 Africa | ENSG00000144935 | TRPC1        | 2.14 | 1.23E-02 |
| H3 Africa | ENSG00000046653 | GPM6B        | 2.14 | 3.58E-03 |
| H3 Africa | ENSG00000095303 | PTGS1        | 2.14 | 9.14E-04 |
| H3 Africa | ENSG00000272141 | RP11_465B228 | 2.14 | 8.89E-03 |
| H3 Africa | ENSG00000105011 | ASF1B        | 2.14 | 3.54E-02 |
| H3 Africa | ENSG00000170955 | CAVIN3       | 2.14 | 4.97E-03 |
| H3 Africa | ENSG00000175505 | CLCF1        | 2.14 | 4.17E-04 |
| H3 Africa | ENSG00000107968 | MAP3K8       | 2.14 | 3.55E-04 |
| H3 Africa | ENSG00000163728 | TTC14        | 2.14 | 2.31E-02 |
| H3 Africa | ENSG00000105339 | DENND3       | 2.14 | 5.35E-05 |
| H3 Africa | ENSG00000196793 | ZNF239       | 2.14 | 1.23E-03 |
| H3 Africa | ENSG00000170458 | CD14         | 2.14 | 6.43E-04 |

|           |                 |                          |      |          |
|-----------|-----------------|--------------------------|------|----------|
| H3 Africa | ENSG00000080986 | NDC80                    | 2.14 | 4.61E-04 |
| H3 Africa | ENSG00000271383 | NBPF10 (includes others) | 2.15 | 1.30E-04 |
| H3 Africa | ENSG00000244694 | PTCHD4                   | 2.15 | 1.08E-03 |
| H3 Africa | ENSG00000124508 | BTN2A2                   | 2.15 | 1.55E-03 |
| H3 Africa | ENSG00000151952 | TMEM132D                 | 2.15 | 3.34E-03 |
| H3 Africa | ENSG00000156587 | UBE2L6                   | 2.15 | 6.80E-04 |
| H3 Africa | ENSG00000095585 | BLNK                     | 2.15 | 3.17E-05 |
| H3 Africa | ENSG00000187955 | COL14A1                  | 2.15 | 3.08E-02 |
| H3 Africa | ENSG00000146070 | PLA2G7                   | 2.15 | 2.47E-03 |
| H3 Africa | ENSG00000158286 | RNF207                   | 2.15 | 3.03E-02 |
| H3 Africa | ENSG00000149451 | ADAM33                   | 2.15 | 3.45E-02 |
| H3 Africa | ENSG00000128805 | ARHGAP22                 | 2.15 | 3.99E-05 |
| H3 Africa | ENSG00000114923 | SLC4A3                   | 2.15 | 5.25E-05 |
| H3 Africa | ENSG00000133083 | DCLK1                    | 2.16 | 1.74E-02 |
| H3 Africa | ENSG00000183454 | GRIN2A                   | 2.16 | 1.98E-02 |
| H3 Africa | ENSG00000091436 | MAP3K20                  | 2.16 | 6.06E-04 |
| H3 Africa | ENSG00000104415 | CCN4                     | 2.16 | 1.21E-03 |
| H3 Africa | ENSG00000123219 | CENPK                    | 2.16 | 3.68E-04 |
| H3 Africa | ENSG00000106686 | SPATA6L                  | 2.16 | 3.33E-03 |
| H3 Africa | ENSG00000157423 | HYDIN                    | 2.16 | 4.34E-04 |
| H3 Africa | ENSG00000276975 | HYDIN2                   | 2.16 | 4.86E-04 |
| H3 Africa | ENSG00000185404 | SP140L                   | 2.16 | 2.04E-05 |
| H3 Africa | ENSG00000050165 | DKK3                     | 2.16 | 1.62E-02 |
| H3 Africa | ENSG00000079819 | EPB41L2                  | 2.16 | 2.24E-05 |
| H3 Africa | ENSG00000211638 | IGLV8-61                 | 2.16 | 1.01E-02 |
| H3 Africa | ENSG00000115604 | IL18R1                   | 2.16 | 3.29E-03 |
| H3 Africa | ENSG00000161040 | FBXL13                   | 2.17 | 7.09E-03 |
| H3 Africa | ENSG00000165929 | TC2N                     | 2.17 | 3.48E-03 |
| H3 Africa | ENSG00000168743 | NPNT                     | 2.17 | 2.75E-02 |
| H3 Africa | ENSG00000130303 | BST2                     | 2.17 | 1.20E-02 |
| H3 Africa | ENSG00000231852 | CYP21A2                  | 2.17 | 4.24E-03 |
| H3 Africa | ENSG00000100644 | HIF1A                    | 2.17 | 3.39E-04 |
| H3 Africa | ENSG00000138448 | ITGAV                    | 2.17 | 2.95E-04 |
| H3 Africa | ENSG00000182010 | RTKN2                    | 2.17 | 1.81E-03 |
| H3 Africa | ENSG00000168229 | PTGDR                    | 2.17 | 4.83E-05 |
| H3 Africa | ENSG00000160180 | TFF3                     | 2.17 | 2.19E-03 |
| H3 Africa | ENSG00000154429 | CCSAP                    | 2.17 | 1.14E-05 |
| H3 Africa | ENSG00000019582 | CD74                     | 2.17 | 2.21E-02 |
| H3 Africa | ENSG00000138180 | CEP55                    | 2.17 | 9.62E-03 |
| H3 Africa | ENSG00000140988 | RPS2                     | 2.18 | 1.00E-03 |
| H3 Africa | ENSG00000175063 | UBE2C                    | 2.18 | 4.44E-03 |
| H3 Africa | ENSG00000142627 | EPHA2                    | 2.18 | 1.48E-02 |
| H3 Africa | ENSG00000277075 | H2AC8                    | 2.18 | 2.73E-03 |
| H3 Africa | ENSG00000085514 | PILRA                    | 2.18 | 3.52E-05 |
| H3 Africa | ENSG00000103064 | SLC7A6                   | 2.18 | 3.49E-05 |
| H3 Africa | ENSG00000075218 | GTSE1                    | 2.18 | 3.63E-02 |
| H3 Africa | ENSG00000106348 | IMPDH1                   | 2.18 | 1.49E-04 |
| H3 Africa | ENSG00000248763 | RP13_644M165             | 2.18 | 1.80E-04 |
| H3 Africa | ENSG00000069974 | RAB27A                   | 2.18 | 8.35E-05 |
| H3 Africa | ENSG00000124225 | PMEPA1                   | 2.19 | 3.90E-03 |
| H3 Africa | ENSG00000145908 | ZNF300                   | 2.19 | 2.31E-04 |
| H3 Africa | ENSG00000198901 | PRC1                     | 2.19 | 2.41E-02 |
| H3 Africa | ENSG00000105329 | TGFB1                    | 2.19 | 1.08E-02 |

|           |                 |              |      |          |
|-----------|-----------------|--------------|------|----------|
| H3 Africa | ENSG00000177054 | ZDHHC13      | 2.19 | 1.14E-05 |
| H3 Africa | ENSG00000154856 | APCDD1       | 2.19 | 1.36E-03 |
| H3 Africa | ENSG00000088826 | SMOX         | 2.19 | 4.13E-02 |
| H3 Africa | ENSG00000134769 | DTNA         | 2.19 | 2.25E-03 |
| H3 Africa | ENSG00000170961 | HAS2         | 2.19 | 4.17E-05 |
| H3 Africa | ENSG00000150782 | IL18         | 2.19 | 3.33E-03 |
| H3 Africa | ENSG00000164611 | PTTG1        | 2.19 | 7.53E-04 |
| H3 Africa | ENSG00000115325 | DOK1         | 2.19 | 3.53E-04 |
| H3 Africa | ENSG00000186469 | GNG2         | 2.19 | 1.23E-05 |
| H3 Africa | ENSG00000075223 | SEMA3C       | 2.19 | 1.15E-02 |
| H3 Africa | ENSG00000161791 | FMNL3        | 2.19 | 8.04E-04 |
| H3 Africa | ENSG00000220785 | MTMR9LP      | 2.19 | 9.62E-03 |
| H3 Africa | ENSG00000109046 | WSB1         | 2.19 | 5.80E-03 |
| H3 Africa | ENSG00000138376 | BARD1        | 2.20 | 8.19E-04 |
| H3 Africa | ENSG00000236283 | AC0134632    | 2.20 | 3.83E-02 |
| H3 Africa | ENSG00000176788 | BASP1        | 2.20 | 1.23E-03 |
| H3 Africa | ENSG00000163689 | CFAP20DC     | 2.20 | 1.06E-03 |
| H3 Africa | ENSG00000197747 | S100A10      | 2.20 | 5.46E-04 |
| H3 Africa | ENSG00000151790 | TDO2         | 2.20 | 8.57E-04 |
| H3 Africa | ENSG00000134531 | EMP1         | 2.20 | 1.37E-02 |
| H3 Africa | ENSG00000171033 | PKIA         | 2.20 | 1.01E-03 |
| H3 Africa | ENSG00000127920 | GNG11        | 2.20 | 3.37E-03 |
| H3 Africa | ENSG00000127129 | EDN2         | 2.20 | 1.69E-02 |
| H3 Africa | ENSG00000220583 | RPL35P2      | 2.20 | 1.85E-02 |
| H3 Africa | ENSG00000183386 | FHL3         | 2.21 | 3.32E-05 |
| H3 Africa | ENSG00000177096 | PHETA2       | 2.21 | 1.45E-03 |
| H3 Africa | ENSG00000137571 | SLCO5A1      | 2.21 | 8.63E-06 |
| H3 Africa | ENSG00000072786 | STK10        | 2.21 | 7.80E-07 |
| H3 Africa | ENSG00000103888 | CEMIP        | 2.21 | 2.84E-06 |
| H3 Africa | ENSG00000131080 | EDA2R        | 2.21 | 1.18E-02 |
| H3 Africa | ENSG00000074219 | TEAD2        | 2.21 | 3.25E-04 |
| H3 Africa | ENSG00000276043 | UHRF1        | 2.21 | 4.09E-02 |
| H3 Africa | ENSG00000237943 | PRKCQ-AS1    | 2.21 | 1.66E-03 |
| H3 Africa | ENSG00000242299 | RP11_234A11  | 2.21 | 1.87E-02 |
| H3 Africa | ENSG00000117226 | GBP3         | 2.21 | 9.83E-04 |
| H3 Africa | ENSG00000162512 | SDC3         | 2.21 | 3.35E-02 |
| H3 Africa | ENSG00000129675 | ARHGEF6      | 2.21 | 1.83E-05 |
| H3 Africa | ENSG00000105088 | OLFM2        | 2.22 | 3.30E-04 |
| H3 Africa | ENSG00000116711 | PLA2G4A      | 2.22 | 1.34E-04 |
| H3 Africa | ENSG00000146039 | SLC17A4      | 2.22 | 1.31E-02 |
| H3 Africa | ENSG00000138172 | CALHM2       | 2.22 | 3.55E-04 |
| H3 Africa | ENSG00000197253 | TPSAB1/TPSB2 | 2.22 | 8.09E-03 |
| H3 Africa | ENSG00000250579 | ADAMTS16-DT  | 2.22 | 3.36E-03 |
| H3 Africa | ENSG00000180340 | FZD2         | 2.22 | 5.80E-03 |
| H3 Africa | ENSG00000204261 | PSMB8-AS1    | 2.22 | 1.65E-05 |
| H3 Africa | ENSG00000173227 | SYT12        | 2.22 | 1.09E-04 |
| H3 Africa | ENSG00000196569 | LAMA2        | 2.23 | 2.45E-03 |
| H3 Africa | ENSG00000144642 | RBMS3        | 2.23 | 2.56E-04 |
| H3 Africa | ENSG00000160145 | KALRN        | 2.23 | 6.67E-03 |
| H3 Africa | ENSG00000251432 | LINC02615    | 2.23 | 2.14E-03 |
| H3 Africa | ENSG00000198075 | SULT1C4      | 2.23 | 9.56E-03 |
| H3 Africa | ENSG00000264538 | SUZ12P1      | 2.23 | 6.84E-03 |
| H3 Africa | ENSG00000198604 | BAZ1A        | 2.23 | 2.71E-04 |

|           |                 |             |      |          |
|-----------|-----------------|-------------|------|----------|
| H3 Africa | ENSG00000162676 | GF11        | 2.23 | 1.96E-03 |
| H3 Africa | ENSG00000181085 | MAPK15      | 2.23 | 3.98E-03 |
| H3 Africa | ENSG00000146938 | NLGN4X      | 2.23 | 5.00E-03 |
| H3 Africa | ENSG00000143217 | NECTIN4     | 2.23 | 5.96E-04 |
| H3 Africa | ENSG00000027075 | PRKCH       | 2.23 | 1.50E-05 |
| H3 Africa | ENSG00000004468 | CD38        | 2.23 | 1.66E-03 |
| H3 Africa | ENSG00000196776 | CD47        | 2.24 | 1.10E-05 |
| H3 Africa | ENSG00000139880 | CDH24       | 2.24 | 5.60E-04 |
| H3 Africa | ENSG00000129680 | MAP7D3      | 2.24 | 9.96E-04 |
| H3 Africa | ENSG00000111696 | NT5DC3      | 2.24 | 2.32E-03 |
| H3 Africa | ENSG00000170542 | SERPINB9    | 2.24 | 2.94E-03 |
| H3 Africa | ENSG00000158270 | COLEC12     | 2.24 | 2.00E-04 |
| H3 Africa | ENSG00000167604 | NFKBID      | 2.24 | 1.99E-04 |
| H3 Africa | ENSG00000109113 | RAB34       | 2.24 | 2.89E-04 |
| H3 Africa | ENSG00000135269 | TES         | 2.24 | 1.21E-04 |
| H3 Africa | ENSG00000090659 | CD209       | 2.24 | 3.48E-03 |
| H3 Africa | ENSG00000106034 | CPED1       | 2.24 | 1.42E-03 |
| H3 Africa | ENSG00000169902 | TPST1       | 2.24 | 2.74E-05 |
| H3 Africa | ENSG00000183346 | CABCOCO1    | 2.25 | 1.84E-04 |
| H3 Africa | ENSG00000134539 | KLRD1       | 2.25 | 2.88E-04 |
| H3 Africa | ENSG00000183935 | HTR7P1      | 2.25 | 1.05E-04 |
| H3 Africa | ENSG00000113140 | SPARC       | 2.25 | 2.31E-02 |
| H3 Africa | ENSG00000144218 | AFF3        | 2.25 | 1.25E-02 |
| H3 Africa | ENSG00000182809 | CRIP2       | 2.25 | 3.53E-04 |
| H3 Africa | ENSG00000168502 | MTCL1       | 2.25 | 3.83E-03 |
| H3 Africa | ENSG00000132718 | SYT11       | 2.25 | 5.83E-03 |
| H3 Africa | ENSG00000135439 | AGAP2       | 2.25 | 3.63E-04 |
| H3 Africa | ENSG00000111252 | SH2B3       | 2.25 | 4.33E-05 |
| H3 Africa | ENSG00000231500 | RPS18       | 2.25 | 2.27E-02 |
| H3 Africa | ENSG00000173918 | C1QTNF1     | 2.26 | 1.85E-03 |
| H3 Africa | ENSG00000133321 | PLAAT4      | 2.26 | 1.24E-03 |
| H3 Africa | ENSG00000145014 | TMEM44      | 2.26 | 2.04E-04 |
| H3 Africa | ENSG00000196911 | KPNA5       | 2.26 | 1.28E-03 |
| H3 Africa | ENSG00000111371 | SLC38A1     | 2.26 | 5.61E-03 |
| H3 Africa | ENSG00000008226 | DLEC1       | 2.26 | 2.39E-04 |
| H3 Africa | ENSG00000112378 | PERP        | 2.26 | 2.53E-03 |
| H3 Africa | ENSG00000175793 | SFN         | 2.26 | 2.67E-03 |
| H3 Africa | ENSG00000093072 | ADA2        | 2.27 | 2.51E-02 |
| H3 Africa | ENSG00000141756 | FKBP10      | 2.27 | 7.88E-04 |
| H3 Africa | ENSG00000101082 | SLA2        | 2.27 | 4.11E-06 |
| H3 Africa | ENSG00000118785 | SPP1        | 2.27 | 4.51E-02 |
| H3 Africa | ENSG00000197540 | GZMM        | 2.27 | 3.84E-06 |
| H3 Africa | ENSG00000196639 | HRH1        | 2.27 | 2.61E-03 |
| H3 Africa | ENSG00000175489 | LRRC25      | 2.27 | 1.64E-05 |
| H3 Africa | ENSG00000095777 | MYO3A       | 2.27 | 1.55E-03 |
| H3 Africa | ENSG00000173559 | NABP1       | 2.27 | 1.55E-02 |
| H3 Africa | ENSG00000259583 | ALDH1A3-AS1 | 2.27 | 6.68E-06 |
| H3 Africa | ENSG00000127324 | TSPAN8      | 2.27 | 4.53E-02 |
| H3 Africa | ENSG00000165949 | IFI27       | 2.27 | 3.06E-02 |
| H3 Africa | ENSG00000065413 | ANKRD44     | 2.27 | 9.70E-06 |
| H3 Africa | ENSG00000259134 | LINC00924   | 2.27 | 1.69E-03 |
| H3 Africa | ENSG00000104814 | MAP4K1      | 2.27 | 5.77E-04 |
| H3 Africa | ENSG00000184584 | STING1      | 2.27 | 1.14E-04 |

|           |                 |          |      |          |
|-----------|-----------------|----------|------|----------|
| H3 Africa | ENSG00000169252 | ADRB2    | 2.28 | 3.53E-04 |
| H3 Africa | ENSG00000103222 | ABCC1    | 2.28 | 1.01E-02 |
| H3 Africa | ENSG00000146530 | VWDE     | 2.28 | 7.44E-06 |
| H3 Africa | ENSG00000163040 | CCDC74A  | 2.28 | 6.69E-04 |
| H3 Africa | ENSG00000145721 | LIX1     | 2.28 | 2.19E-02 |
| H3 Africa | ENSG00000134028 | ADAMDEC1 | 2.28 | 1.27E-06 |
| H3 Africa | ENSG00000171310 | CHST11   | 2.28 | 3.32E-02 |
| H3 Africa | ENSG00000204442 | NALF1    | 2.28 | 1.14E-03 |
| H3 Africa | ENSG00000104361 | NIPAL2   | 2.28 | 4.30E-04 |
| H3 Africa | ENSG00000135426 | TESPA1   | 2.29 | 1.33E-06 |
| H3 Africa | ENSG00000111817 | DSE      | 2.29 | 1.57E-04 |
| H3 Africa | ENSG00000146094 | DOK3     | 2.29 | 5.68E-05 |
| H3 Africa | ENSG00000124143 | ARHGAP40 | 2.29 | 6.57E-03 |
| H3 Africa | ENSG00000172216 | CEBPB    | 2.29 | 2.31E-05 |
| H3 Africa | ENSG00000164794 | KCNV1    | 2.29 | 3.51E-03 |
| H3 Africa | ENSG00000197496 | SLC2A10  | 2.29 | 5.46E-04 |
| H3 Africa | ENSG00000183690 | EFHC2    | 2.29 | 1.73E-03 |
| H3 Africa | ENSG00000122224 | LY9      | 2.30 | 1.14E-06 |
| H3 Africa | ENSG00000155093 | PTPRN2   | 2.30 | 7.41E-05 |
| H3 Africa | ENSG00000164543 | STK17A   | 2.30 | 1.30E-05 |
| H3 Africa | ENSG00000198108 | CHSY3    | 2.30 | 3.01E-05 |
| H3 Africa | ENSG00000242125 | SNHG3    | 2.30 | 2.02E-02 |
| H3 Africa | ENSG00000125910 | S1PR4    | 2.30 | 6.30E-05 |
| H3 Africa | ENSG00000136869 | TLR4     | 2.30 | 2.21E-05 |
| H3 Africa | ENSG00000169122 | FAM110B  | 2.30 | 2.32E-04 |
| H3 Africa | ENSG00000174944 | P2RY14   | 2.30 | 1.41E-03 |
| H3 Africa | ENSG00000183831 | ANKRD45  | 2.30 | 4.66E-04 |
| H3 Africa | ENSG00000204681 | GABBR1   | 2.30 | 3.37E-03 |
| H3 Africa | ENSG00000143515 | ATP8B2   | 2.30 | 1.93E-04 |
| H3 Africa | ENSG00000011465 | DCN      | 2.30 | 2.95E-02 |
| H3 Africa | ENSG00000106123 | EPHB6    | 2.30 | 2.25E-04 |
| H3 Africa | ENSG00000117602 | RCAN3    | 2.30 | 3.56E-04 |
| H3 Africa | ENSG00000274452 | U2       | 2.31 | 1.97E-02 |
| H3 Africa | ENSG00000151466 | SCLT1    | 2.31 | 1.64E-03 |
| H3 Africa | ENSG00000135916 | ITM2C    | 2.31 | 6.59E-04 |
| H3 Africa | ENSG00000143554 | SLC27A3  | 2.31 | 3.83E-04 |
| H3 Africa | ENSG00000171798 | KNDC1    | 2.31 | 5.68E-03 |
| H3 Africa | ENSG00000108950 | FAM20A   | 2.31 | 8.60E-03 |
| H3 Africa | ENSG00000182022 | CHST15   | 2.31 | 1.15E-05 |
| H3 Africa | ENSG00000004660 | CAMKK1   | 2.31 | 2.05E-05 |
| H3 Africa | ENSG00000172116 | CD8B     | 2.31 | 4.72E-06 |
| H3 Africa | ENSG00000169031 | COL4A3   | 2.31 | 3.10E-03 |
| H3 Africa | ENSG00000129465 | RIPK3    | 2.31 | 1.64E-05 |
| H3 Africa | ENSG00000007402 | CACNA2D2 | 2.32 | 1.73E-02 |
| H3 Africa | ENSG00000171617 | ENC1     | 2.32 | 3.13E-04 |
| H3 Africa | ENSG00000237296 | SMG1P1   | 2.32 | 1.58E-02 |
| H3 Africa | ENSG00000107281 | NPDC1    | 2.32 | 1.88E-03 |
| H3 Africa | ENSG00000172794 | RAB37    | 2.32 | 2.20E-04 |
| H3 Africa | ENSG00000181804 | SLC9A9   | 2.32 | 2.77E-04 |
| H3 Africa | ENSG00000198821 | CD247    | 2.32 | 2.98E-04 |
| H3 Africa | ENSG00000138166 | DUSP5    | 2.32 | 4.97E-03 |
| H3 Africa | ENSG00000132357 | CARD6    | 2.32 | 3.48E-04 |
| H3 Africa | ENSG00000166444 | DENND2B  | 2.32 | 2.18E-03 |

|           |                 |             |      |          |
|-----------|-----------------|-------------|------|----------|
| H3 Africa | ENSG00000139625 | MAP3K12     | 2.32 | 8.87E-04 |
| H3 Africa | ENSG00000049449 | RCN1        | 2.32 | 4.11E-03 |
| H3 Africa | ENSG00000007264 | MATK        | 2.32 | 4.16E-06 |
| H3 Africa | ENSG00000101194 | SLC17A9     | 2.32 | 4.90E-06 |
| H3 Africa | ENSG00000141655 | TNFRSF11A   | 2.32 | 1.44E-05 |
| H3 Africa | ENSG00000163814 | CDCP1       | 2.33 | 2.76E-02 |
| H3 Africa | ENSG00000144815 | NXPE3       | 2.33 | 8.08E-05 |
| H3 Africa | ENSG00000139193 | CD27        | 2.33 | 5.66E-05 |
| H3 Africa | ENSG00000175832 | ETV4        | 2.33 | 2.65E-02 |
| H3 Africa | ENSG00000180914 | OXTR        | 2.33 | 1.25E-03 |
| H3 Africa | ENSG00000146373 | RNF217      | 2.33 | 9.73E-05 |
| H3 Africa | ENSG00000171848 | RRM2        | 2.33 | 3.29E-02 |
| H3 Africa | ENSG00000156265 | MAP3K7CL    | 2.33 | 1.56E-03 |
| H3 Africa | ENSG00000138587 | MNS1        | 2.33 | 8.11E-05 |
| H3 Africa | ENSG00000141526 | SLC16A3     | 2.33 | 1.21E-03 |
| H3 Africa | ENSG00000189171 | S100A13     | 2.34 | 1.42E-04 |
| H3 Africa | ENSG00000126787 | DLGAP5      | 2.34 | 6.37E-03 |
| H3 Africa | ENSG00000189159 | JPT1        | 2.34 | 1.84E-04 |
| H3 Africa | ENSG00000200312 | RN7SKP255   | 2.34 | 2.48E-02 |
| H3 Africa | ENSG00000134326 | CMPK2       | 2.35 | 2.91E-03 |
| H3 Africa | ENSG00000156136 | DCK         | 2.35 | 5.75E-06 |
| H3 Africa | ENSG00000106462 | EZH2        | 2.35 | 1.07E-04 |
| H3 Africa | ENSG00000061273 | HDAC7       | 2.35 | 6.44E-05 |
| H3 Africa | ENSG00000251003 | ZFPM2-AS1   | 2.35 | 4.12E-03 |
| H3 Africa | ENSG00000163909 | HEYL        | 2.35 | 1.39E-03 |
| H3 Africa | ENSG00000007312 | CD79B       | 2.35 | 1.81E-05 |
| H3 Africa | ENSG00000117399 | CDC20       | 2.35 | 3.50E-02 |
| H3 Africa | ENSG00000104783 | KCNN4       | 2.35 | 4.18E-05 |
| H3 Africa | ENSG00000111339 | ART4        | 2.36 | 6.65E-04 |
| H3 Africa | ENSG00000165124 | SVEP1       | 2.36 | 2.08E-02 |
| H3 Africa | ENSG00000103522 | IL21R       | 2.36 | 1.25E-06 |
| H3 Africa | ENSG00000065675 | PRKCQ       | 2.36 | 6.69E-03 |
| H3 Africa | ENSG00000237945 | LINC00649   | 2.36 | 1.73E-02 |
| H3 Africa | ENSG00000171631 | P2RY6       | 2.36 | 1.35E-02 |
| H3 Africa | ENSG00000201428 | RN7SKP71    | 2.36 | 3.40E-02 |
| H3 Africa | ENSG00000125869 | LAMP5       | 2.37 | 2.42E-03 |
| H3 Africa | ENSG00000100504 | PYGL        | 2.37 | 1.23E-02 |
| H3 Africa | ENSG00000172932 | ANKRD13D    | 2.37 | 1.59E-03 |
| H3 Africa | ENSG00000149573 | MPZL2       | 2.37 | 2.98E-05 |
| H3 Africa | ENSG00000077327 | SPAG6       | 2.37 | 2.41E-03 |
| H3 Africa | ENSG00000100448 | CTSG        | 2.37 | 1.47E-04 |
| H3 Africa | ENSG00000171522 | PTGER4      | 2.37 | 9.80E-04 |
| H3 Africa | ENSG00000151388 | ADAMTS12    | 2.37 | 3.32E-03 |
| H3 Africa | ENSG00000232533 | FAM131B-AS2 | 2.37 | 1.24E-04 |
| H3 Africa | ENSG00000136237 | RAPGEF5     | 2.37 | 1.19E-04 |
| H3 Africa | ENSG00000198846 | TOX         | 2.37 | 1.22E-03 |
| H3 Africa | ENSG00000235568 | NFAM1       | 2.38 | 1.48E-04 |
| H3 Africa | ENSG00000005001 | PRSS22      | 2.38 | 1.75E-05 |
| H3 Africa | ENSG00000111728 | ST8SIA1     | 2.38 | 3.44E-04 |
| H3 Africa | ENSG00000168078 | PBK         | 2.38 | 1.58E-02 |
| H3 Africa | ENSG00000167912 | TOX-DT      | 2.38 | 2.61E-06 |
| H3 Africa | ENSG00000091656 | ZFHX4       | 2.38 | 4.62E-03 |
| H3 Africa | ENSG00000173198 | CYSLTR1     | 2.38 | 4.34E-05 |



|           |                 |              |      |          |
|-----------|-----------------|--------------|------|----------|
| H3 Africa | ENSG00000152402 | GUCY1A2      | 2.38 | 3.70E-02 |
| H3 Africa | ENSG00000135914 | HTR2B        | 2.38 | 2.72E-03 |
| H3 Africa | ENSG00000227036 | LINC00511    | 2.38 | 1.88E-06 |
| H3 Africa | ENSG00000067445 | TRO          | 2.38 | 1.13E-05 |
| H3 Africa | ENSG00000167535 | CACNB3       | 2.39 | 1.59E-03 |
| H3 Africa | ENSG00000276855 | CTD_3157E162 | 2.39 | 4.10E-05 |
| H3 Africa | ENSG00000100379 | KCTD17       | 2.39 | 9.70E-04 |
| H3 Africa | ENSG00000185499 | MUC1         | 2.39 | 1.25E-03 |
| H3 Africa | ENSG00000105971 | CAV2         | 2.39 | 2.17E-02 |
| H3 Africa | ENSG00000161929 | SCIMP        | 2.39 | 3.39E-06 |
| H3 Africa | ENSG00000138778 | CENPE        | 2.39 | 8.68E-04 |
| H3 Africa | ENSG00000165507 | DEPP1        | 2.39 | 3.25E-03 |
| H3 Africa | ENSG00000123610 | TNFAIP6      | 2.39 | 3.97E-06 |
| H3 Africa | ENSG00000165072 | MAMDC2       | 2.40 | 2.35E-04 |
| H3 Africa | ENSG00000105327 | BBC3         | 2.40 | 2.33E-03 |
| H3 Africa | ENSG00000156738 | MS4A1        | 2.40 | 4.31E-07 |
| H3 Africa | ENSG00000107438 | PDLIM1       | 2.40 | 1.90E-03 |
| H3 Africa | ENSG00000168077 | SCARA3       | 2.40 | 6.36E-03 |
| H3 Africa | ENSG00000196924 | FLNA         | 2.40 | 6.06E-03 |
| H3 Africa | ENSG00000127415 | IDUA         | 2.40 | 2.20E-05 |
| H3 Africa | ENSG00000106003 | LFNG         | 2.40 | 1.09E-04 |
| H3 Africa | ENSG00000129048 | ACKR4        | 2.40 | 1.99E-05 |
| H3 Africa | ENSG00000106624 | AEBP1        | 2.40 | 7.65E-03 |
| H3 Africa | ENSG00000128342 | LIF          | 2.40 | 1.77E-02 |
| H3 Africa | ENSG00000121900 | TMEM54       | 2.40 | 1.34E-03 |
| H3 Africa | ENSG00000132932 | ATP8A2       | 2.41 | 1.48E-02 |
| H3 Africa | ENSG00000189410 | SH2D5        | 2.41 | 8.86E-04 |
| H3 Africa | ENSG00000166851 | PLK1         | 2.41 | 1.82E-03 |
| H3 Africa | ENSG00000138131 | LOXL4        | 2.41 | 3.23E-03 |
| H3 Africa | ENSG00000267519 | MIR23AHG     | 2.41 | 5.18E-03 |
| H3 Africa | ENSG00000182667 | NTM          | 2.41 | 3.37E-03 |
| H3 Africa | ENSG00000165304 | MELK         | 2.41 | 6.03E-04 |
| H3 Africa | ENSG00000173621 | LRFN4        | 2.42 | 2.99E-04 |
| H3 Africa | ENSG00000206190 | ATP10A       | 2.42 | 9.14E-03 |
| H3 Africa | ENSG00000204338 | CYP21A1P     | 2.42 | 7.79E-03 |
| H3 Africa | ENSG00000160013 | PTGIR        | 2.42 | 2.58E-04 |
| H3 Africa | ENSG00000101670 | LIPG         | 2.42 | 2.21E-02 |
| H3 Africa | ENSG00000188290 | HES4         | 2.42 | 5.72E-03 |
| H3 Africa | ENSG00000125384 | PTGER2       | 2.42 | 5.85E-06 |
| H3 Africa | ENSG00000124766 | SOX4         | 2.42 | 1.41E-02 |
| H3 Africa | ENSG00000187498 | COL4A1       | 2.42 | 1.67E-02 |
| H3 Africa | ENSG00000069431 | ABCC9        | 2.43 | 4.88E-03 |
| H3 Africa | ENSG00000276180 | H4C9         | 2.43 | 1.00E-04 |
| H3 Africa | ENSG00000091592 | NLRP1        | 2.43 | 5.77E-04 |
| H3 Africa | ENSG00000183853 | KIRREL1      | 2.43 | 7.27E-03 |
| H3 Africa | ENSG00000159840 | ZYX          | 2.43 | 1.94E-03 |
| H3 Africa | ENSG00000143476 | DTL          | 2.43 | 8.62E-04 |
| H3 Africa | ENSG00000104903 | LYL1         | 2.43 | 1.69E-04 |
| H3 Africa | ENSG00000152661 | GJA1         | 2.43 | 5.51E-03 |
| H3 Africa | ENSG00000119699 | TGFB3        | 2.43 | 5.14E-05 |
| H3 Africa | ENSG00000276903 | H2AC16       | 2.44 | 1.94E-05 |
| H3 Africa | ENSG00000165338 | HECTD2       | 2.44 | 2.84E-03 |
| H3 Africa | ENSG00000070882 | OSBPL3       | 2.44 | 1.94E-05 |

|           |                 |               |      |          |
|-----------|-----------------|---------------|------|----------|
| H3 Africa | ENSG00000105855 | ITGB8         | 2.44 | 9.03E-03 |
| H3 Africa | ENSG00000185989 | RASA3         | 2.44 | 9.84E-05 |
| H3 Africa | ENSG00000143546 | S100A8        | 2.44 | 1.03E-02 |
| H3 Africa | ENSG00000165125 | TRPV6         | 2.44 | 5.52E-04 |
| H3 Africa | ENSG00000244509 | APOBEC3C      | 2.44 | 3.36E-03 |
| H3 Africa | ENSG00000102962 | CCL22         | 2.44 | 1.80E-03 |
| H3 Africa | ENSG00000140285 | FGF7          | 2.44 | 2.40E-02 |
| H3 Africa | ENSG00000274618 | H4C6          | 2.44 | 1.54E-03 |
| H3 Africa | ENSG00000085831 | TTC39A        | 2.44 | 1.11E-02 |
| H3 Africa | ENSG00000138738 | PRDM5         | 2.45 | 2.86E-03 |
| H3 Africa | ENSG00000182287 | AP1S2         | 2.45 | 6.23E-06 |
| H3 Africa | ENSG00000060709 | RIMBP2        | 2.45 | 1.05E-02 |
| H3 Africa | ENSG00000004838 | ZMYND10       | 2.45 | 1.68E-04 |
| H3 Africa | ENSG00000259865 | RP11_488L1810 | 2.45 | 1.07E-04 |
| H3 Africa | ENSG00000118503 | TNFAIP3       | 2.45 | 4.60E-04 |
| H3 Africa | ENSG00000107518 | ATRNL1        | 2.45 | 8.73E-03 |
| H3 Africa | ENSG00000078401 | EDN1          | 2.45 | 8.07E-03 |
| H3 Africa | ENSG00000143226 | FCGR2A        | 2.45 | 4.68E-04 |
| H3 Africa | ENSG00000119547 | ONECUT2       | 2.45 | 1.75E-03 |
| H3 Africa | ENSG00000128487 | SPECC1        | 2.45 | 1.21E-04 |
| H3 Africa | ENSG00000183696 | UPP1          | 2.45 | 3.02E-04 |
| H3 Africa | ENSG00000134470 | IL15RA        | 2.46 | 4.91E-06 |
| H3 Africa | ENSG00000145850 | TIMD4         | 2.46 | 2.98E-03 |
| H3 Africa | ENSG00000182511 | FES           | 2.46 | 1.04E-04 |
| H3 Africa | ENSG00000205220 | PSMB10        | 2.46 | 3.63E-05 |
| H3 Africa | ENSG00000205181 | LINC00654     | 2.46 | 8.12E-04 |
| H3 Africa | ENSG00000158859 | ADAMTS4       | 2.46 | 1.69E-04 |
| H3 Africa | ENSG00000110852 | CLEC2B        | 2.46 | 2.27E-03 |
| H3 Africa | ENSG00000104332 | SFRP1         | 2.46 | 3.22E-03 |
| H3 Africa | ENSG00000124256 | ZBP1          | 2.46 | 8.79E-08 |
| H3 Africa | ENSG00000278530 | CHMP1B2P      | 2.47 | 8.96E-04 |
| H3 Africa | ENSG00000100077 | GRK3          | 2.47 | 1.07E-04 |
| H3 Africa | ENSG00000224373 | IGHV4-59      | 2.47 | 2.18E-02 |
| H3 Africa | ENSG00000160072 | ATAD3B        | 2.47 | 6.00E-03 |
| H3 Africa | ENSG00000100626 | GALNT16       | 2.47 | 7.38E-04 |
| H3 Africa | ENSG00000168389 | MFSD2A        | 2.47 | 5.45E-03 |
| H3 Africa | ENSG00000076641 | PAG1          | 2.47 | 1.92E-07 |
| H3 Africa | ENSG00000174130 | TLR6          | 2.47 | 3.49E-06 |
| H3 Africa | ENSG00000167617 | CDC42EP5      | 2.48 | 4.15E-04 |
| H3 Africa | ENSG00000172123 | SLFN12        | 2.48 | 3.87E-04 |
| H3 Africa | ENSG00000277639 | LOC105371267  | 2.48 | 3.37E-03 |
| H3 Africa | ENSG00000134802 | SLC43A3       | 2.48 | 1.64E-05 |
| H3 Africa | ENSG00000184371 | CSF1          | 2.48 | 1.69E-04 |
| H3 Africa | ENSG00000060558 | GNA15         | 2.48 | 2.18E-04 |
| H3 Africa | ENSG00000105643 | ARRDC2        | 2.48 | 2.99E-04 |
| H3 Africa | ENSG00000112183 | RBM24         | 2.48 | 6.95E-04 |
| H3 Africa | ENSG00000170190 | SLC16A5       | 2.48 | 1.72E-03 |
| H3 Africa | ENSG00000129667 | RHBDF2        | 2.49 | 1.37E-04 |
| H3 Africa | ENSG00000196912 | ANKRD36B      | 2.49 | 7.57E-03 |
| H3 Africa | ENSG00000165434 | PGM2L1        | 2.49 | 2.32E-05 |
| H3 Africa | ENSG00000189056 | RELN          | 2.49 | 4.14E-02 |
| H3 Africa | ENSG00000172403 | SYNPO2        | 2.49 | 1.84E-03 |
| H3 Africa | ENSG00000213462 | ERV3-1        | 2.49 | 5.67E-05 |

|           |                 |                 |      |          |
|-----------|-----------------|-----------------|------|----------|
| H3 Africa | ENSG00000162783 | IER5            | 2.49 | 2.19E-04 |
| H3 Africa | ENSG00000176153 | GPX2            | 2.49 | 3.23E-02 |
| H3 Africa | ENSG00000164877 | MICALL2         | 2.49 | 5.59E-04 |
| H3 Africa | ENSG00000007908 | SELE            | 2.50 | 1.62E-03 |
| H3 Africa | ENSG00000168394 | TAP1            | 2.50 | 4.66E-05 |
| H3 Africa | ENSG00000178562 | CD28            | 2.50 | 9.54E-05 |
| H3 Africa | ENSG00000131037 | EPS8L1          | 2.50 | 2.77E-04 |
| H3 Africa | ENSG00000142765 | SYTL1           | 2.50 | 2.71E-04 |
| H3 Africa | ENSG00000235531 | MSC-AS1         | 2.50 | 2.90E-03 |
| H3 Africa | ENSG00000175265 | GOLGA8A/GOLGA8B | 2.51 | 1.49E-02 |
| H3 Africa | ENSG00000170775 | GPR37           | 2.51 | 2.00E-05 |
| H3 Africa | ENSG00000161638 | ITGA5           | 2.51 | 7.18E-04 |
| H3 Africa | ENSG00000130487 | KLHDC7B         | 2.51 | 2.92E-03 |
| H3 Africa | ENSG00000112655 | PTK7            | 2.51 | 4.22E-05 |
| H3 Africa | ENSG00000176907 | TCIM            | 2.51 | 1.69E-04 |
| H3 Africa | ENSG00000103569 | AQP9            | 2.51 | 9.51E-04 |
| H3 Africa | ENSG00000186470 | BTN3A2          | 2.51 | 5.59E-04 |
| H3 Africa | ENSG00000164932 | CTHRC1          | 2.51 | 1.90E-03 |
| H3 Africa | ENSG00000074370 | ATP2A3          | 2.51 | 1.73E-03 |
| H3 Africa | ENSG00000189129 | PLAC9           | 2.51 | 3.37E-03 |
| H3 Africa | ENSG00000153179 | RASSF3          | 2.52 | 6.07E-07 |
| H3 Africa | ENSG00000172687 | ZNF738          | 2.52 | 2.78E-05 |
| H3 Africa | ENSG00000198113 | TOR4A           | 2.52 | 4.52E-03 |
| H3 Africa | ENSG00000111344 | RASAL1          | 2.52 | 1.00E-02 |
| H3 Africa | ENSG00000104951 | IL4I1           | 2.52 | 2.40E-02 |
| H3 Africa | ENSG00000102359 | SRPX2           | 2.52 | 1.90E-03 |
| H3 Africa | ENSG00000215788 | TNFRSF25        | 2.53 | 8.90E-03 |
| H3 Africa | ENSG00000070404 | FSTL3           | 2.53 | 3.37E-03 |
| H3 Africa | ENSG00000271605 | MILR1           | 2.53 | 8.21E-05 |
| H3 Africa | ENSG00000120254 | MTHFD1L         | 2.53 | 7.82E-05 |
| H3 Africa | ENSG00000179841 | AKAP5           | 2.53 | 2.50E-04 |
| H3 Africa | ENSG00000143851 | PTPN7           | 2.53 | 1.99E-04 |
| H3 Africa | ENSG00000126759 | CFP             | 2.53 | 1.47E-04 |
| H3 Africa | ENSG00000183486 | MX2             | 2.53 | 1.02E-03 |
| H3 Africa | ENSG00000139679 | LPAR6           | 2.54 | 6.50E-04 |
| H3 Africa | ENSG00000137648 | TMPRSS4         | 2.54 | 8.04E-04 |
| H3 Africa | ENSG00000015475 | BID             | 2.54 | 1.04E-04 |
| H3 Africa | ENSG00000099337 | KCNK6           | 2.54 | 4.16E-05 |
| H3 Africa | ENSG00000198133 | TMEM229B        | 2.54 | 1.37E-04 |
| H3 Africa | ENSG00000197238 | H4C11           | 2.54 | 4.24E-04 |
| H3 Africa | ENSG00000129009 | ISLR            | 2.54 | 7.26E-03 |
| H3 Africa | ENSG00000169679 | BUB1            | 2.54 | 6.76E-03 |
| H3 Africa | ENSG00000132965 | ALOX5AP         | 2.54 | 7.78E-05 |
| H3 Africa | ENSG00000131459 | GFPT2           | 2.54 | 3.51E-04 |
| H3 Africa | ENSG00000064547 | LPAR2           | 2.54 | 1.33E-04 |
| H3 Africa | ENSG00000007933 | FMO3            | 2.55 | 1.46E-03 |
| H3 Africa | ENSG00000145386 | CCNA2           | 2.55 | 1.33E-02 |
| H3 Africa | ENSG00000183742 | MACC1           | 2.55 | 7.88E-03 |
| H3 Africa | ENSG00000164038 | SLC9B2          | 2.55 | 5.04E-04 |
| H3 Africa | ENSG00000137033 | IL33            | 2.55 | 1.68E-03 |
| H3 Africa | ENSG00000162739 | SLAMF6          | 2.55 | 5.76E-05 |
| H3 Africa | ENSG00000117090 | SLAMF1          | 2.56 | 4.31E-07 |
| H3 Africa | ENSG00000162692 | VCAM1           | 2.56 | 6.61E-03 |

|           |                 |           |      |          |
|-----------|-----------------|-----------|------|----------|
| H3 Africa | ENSG00000178852 | EFCAB13   | 2.56 | 1.33E-03 |
| H3 Africa | ENSG00000160219 | GAB3      | 2.56 | 3.88E-05 |
| H3 Africa | ENSG00000167767 | KRT80     | 2.56 | 3.40E-02 |
| H3 Africa | ENSG00000258628 | RHPN2P1   | 2.56 | 1.30E-02 |
| H3 Africa | ENSG00000100628 | ASB2      | 2.56 | 4.53E-07 |
| H3 Africa | ENSG00000139618 | BRCA2     | 2.57 | 1.49E-04 |
| H3 Africa | ENSG00000151746 | BICD1     | 2.57 | 4.77E-04 |
| H3 Africa | ENSG00000092929 | UNC13D    | 2.57 | 6.73E-04 |
| H3 Africa | ENSG00000088340 | FER1L4    | 2.57 | 7.79E-04 |
| H3 Africa | ENSG00000272398 | CD24      | 2.57 | 8.91E-04 |
| H3 Africa | ENSG00000232629 | HLA-DQB2  | 2.57 | 5.36E-03 |
| H3 Africa | ENSG00000005884 | ITGA3     | 2.57 | 1.43E-02 |
| H3 Africa | ENSG00000070669 | ASNS      | 2.57 | 1.03E-05 |
| H3 Africa | ENSG00000185905 | C16orf54  | 2.58 | 1.25E-05 |
| H3 Africa | ENSG00000129038 | LOXL1     | 2.58 | 2.73E-04 |
| H3 Africa | ENSG00000188313 | PLSCR1    | 2.58 | 9.17E-07 |
| H3 Africa | ENSG00000157601 | MX1       | 2.58 | 4.47E-03 |
| H3 Africa | ENSG00000166710 | B2M       | 2.59 | 1.44E-05 |
| H3 Africa | ENSG00000159399 | HK2       | 2.59 | 2.20E-04 |
| H3 Africa | ENSG00000068831 | RASGRP2   | 2.59 | 3.07E-03 |
| H3 Africa | ENSG00000088882 | CPXM1     | 2.59 | 9.06E-04 |
| H3 Africa | ENSG00000146285 | SCML4     | 2.59 | 3.49E-07 |
| H3 Africa | ENSG00000087116 | ADAMTS2   | 2.60 | 1.35E-03 |
| H3 Africa | ENSG00000256229 | ZNF486    | 2.60 | 2.87E-03 |
| H3 Africa | ENSG00000276566 | IGKV1D-13 | 2.60 | 4.71E-05 |
| H3 Africa | ENSG00000185130 | H2BC13    | 2.60 | 1.00E-04 |
| H3 Africa | ENSG00000163075 | CFAP221   | 2.60 | 1.36E-05 |
| H3 Africa | ENSG00000119969 | HELLS     | 2.61 | 2.77E-04 |
| H3 Africa | ENSG00000168386 | FILIP1L   | 2.61 | 2.00E-03 |
| H3 Africa | ENSG00000130511 | SSBP4     | 2.61 | 5.64E-06 |
| H3 Africa | ENSG00000155849 | ELMO1     | 2.61 | 1.92E-05 |
| H3 Africa | ENSG00000166592 | RRAD      | 2.61 | 3.58E-03 |
| H3 Africa | ENSG00000172716 | SLFN11    | 2.61 | 7.60E-05 |
| H3 Africa | ENSG00000275126 | H4C13     | 2.61 | 2.52E-05 |
| H3 Africa | ENSG00000151702 | FLI1      | 2.62 | 8.26E-06 |
| H3 Africa | ENSG00000110446 | SLC15A3   | 2.62 | 3.33E-05 |
| H3 Africa | ENSG00000171345 | KRT19     | 2.62 | 1.36E-03 |
| H3 Africa | ENSG00000152926 | ZNF117    | 2.62 | 2.92E-03 |
| H3 Africa | ENSG00000244575 | IGKV1-27  | 2.62 | 9.02E-04 |
| H3 Africa | ENSG00000142945 | KIF2C     | 2.62 | 2.27E-04 |
| H3 Africa | ENSG00000101871 | MID1      | 2.62 | 2.39E-04 |
| H3 Africa | ENSG00000088325 | TPX2      | 2.62 | 3.94E-02 |
| H3 Africa | ENSG00000072110 | ACTN1     | 2.62 | 9.08E-05 |
| H3 Africa | ENSG00000097046 | CDC7      | 2.62 | 1.85E-05 |
| H3 Africa | ENSG00000140511 | HAPLN3    | 2.62 | 4.91E-06 |
| H3 Africa | ENSG00000109805 | NCAPG     | 2.62 | 1.02E-03 |
| H3 Africa | ENSG00000204264 | PSMB8     | 2.62 | 1.25E-06 |
| H3 Africa | ENSG00000165164 | CFAP47    | 2.63 | 1.26E-04 |
| H3 Africa | ENSG00000183856 | IQGAP3    | 2.63 | 3.27E-02 |
| H3 Africa | ENSG00000151883 | PARP8     | 2.63 | 2.45E-06 |
| H3 Africa | ENSG00000201998 | SNORA23   | 2.63 | 1.31E-02 |
| H3 Africa | ENSG00000140379 | BCL2A1    | 2.63 | 2.05E-06 |
| H3 Africa | ENSG00000166278 | C2        | 2.63 | 1.36E-02 |

|           |                 |              |      |          |
|-----------|-----------------|--------------|------|----------|
| H3 Africa | ENSG00000197766 | CFD          | 2.63 | 2.98E-04 |
| H3 Africa | ENSG00000106366 | SERPINE1     | 2.63 | 2.17E-02 |
| H3 Africa | ENSG00000143387 | CTSK         | 2.63 | 1.60E-03 |
| H3 Africa | ENSG00000106560 | GIMAP2       | 2.64 | 1.67E-05 |
| H3 Africa | ENSG00000168404 | MLKL         | 2.64 | 5.14E-05 |
| H3 Africa | ENSG00000184254 | ALDH1A3      | 2.64 | 7.84E-04 |
| H3 Africa | ENSG00000142303 | ADAMTS10     | 2.64 | 1.33E-03 |
| H3 Africa | ENSG00000174501 | ANKRD36C     | 2.64 | 6.40E-03 |
| H3 Africa | ENSG00000163576 | EFHB         | 2.64 | 1.55E-04 |
| H3 Africa | ENSG00000119900 | OGFRL1       | 2.65 | 1.94E-05 |
| H3 Africa | ENSG00000227502 | MROCKI       | 2.65 | 8.11E-03 |
| H3 Africa | ENSG00000110079 | MS4A4A       | 2.65 | 8.38E-05 |
| H3 Africa | ENSG00000197142 | ACSL5        | 2.66 | 7.37E-05 |
| H3 Africa | ENSG00000103196 | CRISPLD2     | 2.66 | 1.19E-03 |
| H3 Africa | ENSG00000196684 | HSH2D        | 2.66 | 2.81E-06 |
| H3 Africa | ENSG00000212443 | SNORA53      | 2.66 | 2.15E-02 |
| H3 Africa | ENSG00000280411 | IGHV1-69D    | 2.66 | 6.69E-05 |
| H3 Africa | ENSG00000049130 | KITLG        | 2.66 | 1.03E-05 |
| H3 Africa | ENSG00000178773 | CPNE7        | 2.66 | 4.62E-04 |
| H3 Africa | ENSG00000108797 | CNTNAP1      | 2.66 | 1.98E-04 |
| H3 Africa | ENSG00000007237 | GAS7         | 2.67 | 1.66E-04 |
| H3 Africa | ENSG00000114450 | GNB4         | 2.67 | 5.07E-07 |
| H3 Africa | ENSG00000163359 | COL6A3       | 2.67 | 2.25E-03 |
| H3 Africa | ENSG00000183598 | H3C13        | 2.68 | 2.30E-04 |
| H3 Africa | ENSG00000118473 | SGIP1        | 2.68 | 1.25E-02 |
| H3 Africa | ENSG00000129682 | FGF13        | 2.68 | 4.57E-06 |
| H3 Africa | ENSG00000112769 | LAMA4        | 2.68 | 2.24E-04 |
| H3 Africa | ENSG00000071246 | VASH1        | 2.68 | 1.10E-05 |
| H3 Africa | ENSG00000213445 | SIPA1        | 2.68 | 9.27E-08 |
| H3 Africa | ENSG00000260314 | MRC1         | 2.69 | 3.99E-05 |
| H3 Africa | ENSG00000164430 | CGAS         | 2.69 | 2.07E-05 |
| H3 Africa | ENSG00000230630 | DNM3OS       | 2.69 | 5.56E-03 |
| H3 Africa | ENSG00000181218 | H2AW         | 2.69 | 2.44E-05 |
| H3 Africa | ENSG00000223914 | LINC02471    | 2.69 | 2.04E-05 |
| H3 Africa | ENSG00000169413 | RNASE6       | 2.69 | 3.67E-07 |
| H3 Africa | ENSG00000181381 | DDX60L       | 2.69 | 1.73E-05 |
| H3 Africa | ENSG00000077238 | IL4R         | 2.70 | 2.06E-05 |
| H3 Africa | ENSG00000175315 | CST6         | 2.70 | 2.52E-06 |
| H3 Africa | ENSG00000161381 | PLXDC1       | 2.70 | 1.85E-03 |
| H3 Africa | ENSG00000257027 | RP11_705C153 | 2.70 | 6.45E-05 |
| H3 Africa | ENSG00000168421 | RHOH         | 2.70 | 2.65E-07 |
| H3 Africa | ENSG00000099958 | DERL3        | 2.71 | 1.33E-06 |
| H3 Africa | ENSG00000138185 | ENTPD1       | 2.71 | 3.17E-05 |
| H3 Africa | ENSG00000164125 | GASK1B       | 2.71 | 8.25E-04 |
| H3 Africa | ENSG00000130208 | APOC1        | 2.71 | 9.14E-03 |
| H3 Africa | ENSG00000197405 | C5AR1        | 2.71 | 4.50E-06 |
| H3 Africa | ENSG00000234745 | HLA-B        | 2.71 | 4.41E-04 |
| H3 Africa | ENSG00000134602 | STK26        | 2.71 | 3.32E-04 |
| H3 Africa | ENSG00000159110 | IFNAR2       | 2.71 | 5.12E-05 |
| H3 Africa | ENSG00000145536 | ADAMTS16     | 2.72 | 9.11E-04 |
| H3 Africa | ENSG00000062038 | CDH3         | 2.72 | 6.01E-03 |
| H3 Africa | ENSG00000134369 | NAV1         | 2.72 | 3.99E-06 |
| H3 Africa | ENSG00000198542 | ITGBL1       | 2.72 | 3.11E-03 |

|           |                 |                          |      |          |
|-----------|-----------------|--------------------------|------|----------|
| H3 Africa | ENSG00000143110 | C1orf162                 | 2.72 | 2.42E-06 |
| H3 Africa | ENSG00000167207 | NOD2                     | 2.72 | 1.13E-05 |
| H3 Africa | ENSG00000079215 | SLC1A3                   | 2.72 | 6.03E-05 |
| H3 Africa | ENSG00000059377 | TBXAS1                   | 2.72 | 6.99E-06 |
| H3 Africa | ENSG00000137265 | IRF4                     | 2.72 | 6.14E-04 |
| H3 Africa | ENSG00000167851 | CD300A                   | 2.73 | 1.19E-06 |
| H3 Africa | ENSG00000186867 | QRFPR                    | 2.73 | 7.36E-05 |
| H3 Africa | ENSG00000136542 | GALNT5                   | 2.73 | 3.38E-03 |
| H3 Africa | ENSG00000198121 | LPAR1                    | 2.73 | 9.02E-04 |
| H3 Africa | ENSG00000144369 | FAM171B                  | 2.74 | 1.50E-04 |
| H3 Africa | ENSG00000123146 | ADGRE5                   | 2.74 | 1.57E-03 |
| H3 Africa | ENSG00000082196 | C1QTNF3                  | 2.74 | 5.26E-05 |
| H3 Africa | ENSG00000259207 | ITGB3                    | 2.74 | 2.45E-02 |
| H3 Africa | ENSG00000057657 | PRDM1                    | 2.74 | 2.47E-06 |
| H3 Africa | ENSG00000185697 | MYBL1                    | 2.74 | 3.22E-06 |
| H3 Africa | ENSG00000105559 | PLEKHA4                  | 2.75 | 1.34E-03 |
| H3 Africa | ENSG00000112303 | VNN2                     | 2.75 | 1.42E-07 |
| H3 Africa | ENSG00000173200 | PARP15                   | 2.75 | 1.88E-06 |
| H3 Africa | ENSG00000068366 | ACSL4                    | 2.75 | 2.49E-04 |
| H3 Africa | ENSG00000130827 | PLXNA3                   | 2.75 | 2.56E-04 |
| H3 Africa | ENSG00000172215 | CXCR6                    | 2.75 | 4.91E-06 |
| H3 Africa | ENSG00000197153 | H3C12                    | 2.75 | 9.08E-07 |
| H3 Africa | ENSG00000266338 | NBPF10 (includes others) | 2.75 | 4.03E-05 |
| H3 Africa | ENSG00000249437 | NAIP                     | 2.76 | 1.66E-04 |
| H3 Africa | ENSG00000163803 | PLB1                     | 2.76 | 1.62E-05 |
| H3 Africa | ENSG00000104856 | RELB                     | 2.76 | 1.24E-04 |
| H3 Africa | ENSG00000138685 | FGF2                     | 2.77 | 6.41E-04 |
| H3 Africa | ENSG00000278588 | H2BC10                   | 2.77 | 1.47E-04 |
| H3 Africa | ENSG00000254087 | LYN                      | 2.77 | 4.07E-08 |
| H3 Africa | ENSG00000181631 | P2RY13                   | 2.77 | 1.12E-06 |
| H3 Africa | ENSG00000137078 | SIT1                     | 2.77 | 1.51E-06 |
| H3 Africa | ENSG00000147443 | DOK2                     | 2.77 | 1.55E-06 |
| H3 Africa | ENSG00000167460 | TPM4                     | 2.78 | 1.14E-05 |
| H3 Africa | ENSG00000204642 | HLA-F                    | 2.79 | 2.98E-04 |
| H3 Africa | ENSG00000059804 | SLC2A3                   | 2.79 | 1.49E-06 |
| H3 Africa | ENSG00000114251 | WNT5A                    | 2.79 | 1.28E-02 |
| H3 Africa | ENSG00000270550 | IGHV3-30                 | 2.79 | 1.20E-02 |
| H3 Africa | ENSG00000013810 | TACC3                    | 2.79 | 2.25E-04 |
| H3 Africa | ENSG00000231991 | ANXA2P2                  | 2.79 | 2.58E-06 |
| H3 Africa | ENSG00000164692 | COL1A2                   | 2.79 | 1.21E-03 |
| H3 Africa | ENSG00000230006 | ANKRD36BP2               | 2.79 | 1.34E-04 |
| H3 Africa | ENSG00000197872 | CYRIA                    | 2.79 | 8.63E-06 |
| H3 Africa | ENSG00000115415 | STAT1                    | 2.79 | 1.94E-05 |
| H3 Africa | ENSG00000167601 | AXL                      | 2.80 | 5.25E-05 |
| H3 Africa | ENSG00000060982 | BCAT1                    | 2.80 | 2.93E-03 |
| H3 Africa | ENSG00000122188 | LAX1                     | 2.80 | 1.95E-07 |
| H3 Africa | ENSG00000196781 | TLE1                     | 2.80 | 4.71E-05 |
| H3 Africa | ENSG00000183778 | B3GALT5                  | 2.80 | 6.53E-04 |
| H3 Africa | ENSG00000165887 | ANKRD2                   | 2.80 | 2.35E-02 |
| H3 Africa | ENSG00000161249 | DMKN                     | 2.80 | 3.86E-05 |
| H3 Africa | ENSG00000168461 | RAB31                    | 2.80 | 3.56E-06 |
| H3 Africa | ENSG00000136404 | TM6SF1                   | 2.80 | 5.16E-06 |
| H3 Africa | ENSG00000085265 | FCN1                     | 2.80 | 3.32E-04 |

|           |                 |            |      |          |
|-----------|-----------------|------------|------|----------|
| H3 Africa | ENSG00000111145 | ELK3       | 2.81 | 4.50E-06 |
| H3 Africa | ENSG00000170476 | MZB1       | 2.81 | 4.39E-03 |
| H3 Africa | ENSG00000173846 | PLK3       | 2.81 | 5.76E-05 |
| H3 Africa | ENSG00000064763 | FAR2       | 2.81 | 2.96E-06 |
| H3 Africa | ENSG00000185507 | IRF7       | 2.81 | 1.25E-04 |
| H3 Africa | ENSG00000136235 | GPNMB      | 2.82 | 1.07E-02 |
| H3 Africa | ENSG00000129654 | FOXJ1      | 2.82 | 7.95E-03 |
| H3 Africa | ENSG00000179869 | ABCA13     | 2.83 | 1.75E-04 |
| H3 Africa | ENSG00000175130 | MARCKSL1   | 2.83 | 5.53E-04 |
| H3 Africa | ENSG00000125398 | SOX9       | 2.83 | 6.65E-03 |
| H3 Africa | ENSG00000154127 | UBASH3B    | 2.83 | 4.44E-05 |
| H3 Africa | ENSG00000147251 | DOCK11     | 2.83 | 1.00E-04 |
| H3 Africa | ENSG00000011426 | ANLN       | 2.83 | 1.33E-02 |
| H3 Africa | ENSG00000256594 | LOC374443  | 2.84 | 1.03E-05 |
| H3 Africa | ENSG00000160185 | UBASH3A    | 2.84 | 1.50E-06 |
| H3 Africa | ENSG00000103742 | IGDCC4     | 2.84 | 8.12E-03 |
| H3 Africa | ENSG00000168487 | BMP1       | 2.85 | 9.65E-06 |
| H3 Africa | ENSG00000067798 | NAV3       | 2.85 | 2.29E-04 |
| H3 Africa | ENSG00000165457 | FOLR2      | 2.85 | 6.94E-05 |
| H3 Africa | ENSG00000125347 | IRF1       | 2.85 | 4.57E-06 |
| H3 Africa | ENSG00000175471 | MCTP1      | 2.85 | 1.13E-03 |
| H3 Africa | ENSG00000113361 | CDH6       | 2.86 | 1.98E-03 |
| H3 Africa | ENSG00000124813 | RUNX2      | 2.86 | 3.67E-07 |
| H3 Africa | ENSG00000096996 | IL12RB1    | 2.86 | 2.38E-06 |
| H3 Africa | ENSG00000234184 | LINC01781  | 2.86 | 9.91E-04 |
| H3 Africa | ENSG00000205413 | SAMD9      | 2.86 | 1.49E-07 |
| H3 Africa | ENSG00000142227 | EMP3       | 2.86 | 5.30E-05 |
| H3 Africa | ENSG00000110448 | CD5        | 2.87 | 3.28E-07 |
| H3 Africa | ENSG00000100985 | MMP9       | 2.87 | 2.01E-02 |
| H3 Africa | ENSG00000147408 | CSGALNACT1 | 2.87 | 5.55E-06 |
| H3 Africa | ENSG00000117724 | CENPF      | 2.88 | 2.88E-02 |
| H3 Africa | ENSG00000084636 | COL16A1    | 2.88 | 3.33E-03 |
| H3 Africa | ENSG00000145632 | PLK2       | 2.88 | 1.13E-03 |
| H3 Africa | ENSG00000151835 | SACS       | 2.88 | 1.79E-04 |
| H3 Africa | ENSG00000081041 | CXCL2      | 2.88 | 2.04E-05 |
| H3 Africa | ENSG00000131711 | MAP1B      | 2.88 | 1.29E-02 |
| H3 Africa | ENSG00000101057 | MYBL2      | 2.88 | 6.15E-05 |
| H3 Africa | ENSG00000140416 | TPM1       | 2.88 | 1.90E-05 |
| H3 Africa | ENSG00000228262 | LINC01320  | 2.89 | 3.71E-05 |
| H3 Africa | ENSG00000163435 | ELF3       | 2.89 | 1.59E-03 |
| H3 Africa | ENSG00000115414 | FN1        | 2.89 | 2.84E-03 |
| H3 Africa | ENSG00000124635 | H2BC11     | 2.89 | 4.89E-05 |
| H3 Africa | ENSG00000065911 | MTHFD2     | 2.89 | 1.32E-05 |
| H3 Africa | ENSG00000048740 | CELF2      | 2.89 | 1.03E-05 |
| H3 Africa | ENSG00000243449 | C4orf48    | 2.89 | 1.14E-05 |
| H3 Africa | ENSG00000162711 | NLRP3      | 2.90 | 1.06E-07 |
| H3 Africa | ENSG00000152495 | CAMK4      | 2.90 | 1.50E-06 |
| H3 Africa | ENSG00000158517 | NCF1       | 2.91 | 2.09E-07 |
| H3 Africa | ENSG00000176971 | FIBIN      | 2.91 | 9.80E-06 |
| H3 Africa | ENSG00000082074 | FYB1       | 2.91 | 5.76E-06 |
| H3 Africa | ENSG00000253368 | TRNP1      | 2.91 | 1.42E-04 |
| H3 Africa | ENSG00000135976 | ANKRD36    | 2.91 | 4.52E-03 |
| H3 Africa | ENSG00000087495 | PHACTR3    | 2.91 | 3.99E-05 |

|           |                 |          |      |          |
|-----------|-----------------|----------|------|----------|
| H3 Africa | ENSG00000119866 | BCL11A   | 2.92 | 3.40E-05 |
| H3 Africa | ENSG00000102287 | GABRE    | 2.92 | 1.29E-03 |
| H3 Africa | ENSG00000168016 | TRANK1   | 2.92 | 6.30E-05 |
| H3 Africa | ENSG00000147724 | FAM135B  | 2.93 | 8.62E-04 |
| H3 Africa | ENSG00000211949 | IGHV3-23 | 2.93 | 9.83E-04 |
| H3 Africa | ENSG00000124126 | PREX1    | 2.93 | 2.52E-07 |
| H3 Africa | ENSG00000151651 | ADAM8    | 2.93 | 1.48E-05 |
| H3 Africa | ENSG00000138755 | CXCL9    | 2.94 | 1.24E-04 |
| H3 Africa | ENSG00000130429 | ARPC1B   | 2.94 | 1.75E-05 |
| H3 Africa | ENSG00000266094 | RASSF5   | 2.94 | 1.28E-04 |
| H3 Africa | ENSG00000133216 | EPHB2    | 2.95 | 8.19E-04 |
| H3 Africa | ENSG00000126882 | FAM78A   | 2.95 | 7.92E-08 |
| H3 Africa | ENSG00000177272 | KCNA3    | 2.95 | 8.63E-06 |
| H3 Africa | ENSG00000127954 | STEAP4   | 2.95 | 6.40E-03 |
| H3 Africa | ENSG00000154589 | LY96     | 2.95 | 2.34E-05 |
| H3 Africa | ENSG00000007174 | DNAH9    | 2.95 | 2.85E-04 |
| H3 Africa | ENSG00000115963 | RND3     | 2.95 | 7.99E-05 |
| H3 Africa | ENSG00000167984 | NLRC3    | 2.95 | 5.67E-06 |
| H3 Africa | ENSG00000198648 | STK39    | 2.95 | 1.64E-05 |
| H3 Africa | ENSG00000211662 | IGLV3-21 | 2.96 | 2.46E-02 |
| H3 Africa | ENSG00000124203 | ZNF831   | 2.96 | 2.36E-06 |
| H3 Africa | ENSG00000160326 | SLC2A6   | 2.96 | 1.91E-05 |
| H3 Africa | ENSG00000111331 | OAS3     | 2.96 | 1.66E-03 |
| H3 Africa | ENSG00000277734 | TRAC     | 2.97 | 5.00E-06 |
| H3 Africa | ENSG00000156140 | ADAMTS3  | 2.97 | 5.68E-05 |
| H3 Africa | ENSG00000205885 | C1RL-AS1 | 2.98 | 2.74E-05 |
| H3 Africa | ENSG00000162849 | KIF26B   | 2.98 | 6.43E-04 |
| H3 Africa | ENSG00000090376 | IRAK3    | 2.99 | 1.44E-05 |
| H3 Africa | ENSG00000211935 | IGHV1-3  | 2.99 | 1.33E-04 |
| H3 Africa | ENSG00000178752 | ERFE     | 3.00 | 3.30E-03 |
| H3 Africa | ENSG00000278828 | H3C10    | 3.00 | 2.55E-06 |
| H3 Africa | ENSG00000179603 | GRM8     | 3.00 | 3.13E-05 |
| H3 Africa | ENSG00000131187 | F12      | 3.00 | 1.13E-06 |
| H3 Africa | ENSG00000137462 | TLR2     | 3.00 | 3.29E-07 |
| H3 Africa | ENSG00000175567 | UCP2     | 3.00 | 1.44E-04 |
| H3 Africa | ENSG00000136425 | CIB2     | 3.01 | 1.88E-03 |
| H3 Africa | ENSG00000185215 | TNFAIP2  | 3.01 | 7.44E-04 |
| H3 Africa | ENSG00000236699 | ARHGEF38 | 3.01 | 2.76E-05 |
| H3 Africa | ENSG00000162458 | FBLIM1   | 3.02 | 1.04E-04 |
| H3 Africa | ENSG00000110876 | SELPLG   | 3.02 | 2.21E-06 |
| H3 Africa | ENSG00000082512 | TRAF5    | 3.02 | 7.53E-06 |
| H3 Africa | ENSG00000137331 | IER3     | 3.02 | 4.49E-04 |
| H3 Africa | ENSG00000171223 | JUNB     | 3.02 | 7.87E-04 |
| H3 Africa | ENSG00000140853 | NLRC5    | 3.02 | 1.23E-05 |
| H3 Africa | ENSG00000019991 | HGF      | 3.02 | 5.40E-03 |
| H3 Africa | ENSG00000141934 | PLPP2    | 3.03 | 1.78E-04 |
| H3 Africa | ENSG00000240694 | PNMA2    | 3.03 | 4.94E-03 |
| H3 Africa | ENSG00000134247 | PTGFRN   | 3.04 | 3.50E-03 |
| H3 Africa | ENSG00000177675 | CD163L1  | 3.04 | 2.98E-05 |
| H3 Africa | ENSG00000197903 | H2BC12   | 3.04 | 6.84E-06 |
| H3 Africa | ENSG00000275713 | H2BC9    | 3.04 | 5.01E-04 |
| H3 Africa | ENSG00000146038 | DCDC2    | 3.04 | 2.92E-05 |
| H3 Africa | ENSG00000187653 | TMSB4XP8 | 3.05 | 1.99E-05 |



|           |                 |            |      |          |
|-----------|-----------------|------------|------|----------|
| H3 Africa | ENSG00000121966 | CXCR4      | 3.05 | 5.67E-06 |
| H3 Africa | ENSG00000111335 | OAS2       | 3.05 | 1.16E-03 |
| H3 Africa | ENSG00000117152 | RGS4       | 3.05 | 3.74E-04 |
| H3 Africa | ENSG00000127412 | TRPV5      | 3.06 | 1.04E-02 |
| H3 Africa | ENSG00000163191 | S100A11    | 3.06 | 2.85E-05 |
| H3 Africa | ENSG00000213186 | TRIM59     | 3.06 | 1.58E-05 |
| H3 Africa | ENSG00000155761 | SPAG17     | 3.06 | 2.98E-05 |
| H3 Africa | ENSG00000089041 | P2RX7      | 3.07 | 1.65E-06 |
| H3 Africa | ENSG00000187688 | TRPV2      | 3.07 | 3.18E-06 |
| H3 Africa | ENSG00000169604 | ANTXR1     | 3.08 | 7.06E-05 |
| H3 Africa | ENSG00000166750 | SLFN5      | 3.08 | 7.94E-06 |
| H3 Africa | ENSG00000142185 | TRPM2      | 3.08 | 2.30E-05 |
| H3 Africa | ENSG00000022267 | FHL1       | 3.08 | 7.14E-05 |
| H3 Africa | ENSG00000160654 | CD3G       | 3.08 | 9.75E-07 |
| H3 Africa | ENSG00000185567 | AHNAK2     | 3.09 | 3.31E-03 |
| H3 Africa | ENSG00000204136 | GGTA1      | 3.09 | 1.48E-05 |
| H3 Africa | ENSG00000103490 | PYCARD     | 3.09 | 8.44E-06 |
| H3 Africa | ENSG00000142102 | PGGHG      | 3.09 | 1.00E-04 |
| H3 Africa | ENSG00000163430 | FSTL1      | 3.09 | 2.77E-05 |
| H3 Africa | ENSG00000176406 | RIMS2      | 3.10 | 1.59E-04 |
| H3 Africa | ENSG00000089327 | FXYD5      | 3.10 | 1.98E-08 |
| H3 Africa | ENSG00000134013 | LOXL2      | 3.10 | 4.79E-04 |
| H3 Africa | ENSG00000197956 | S100A6     | 3.10 | 1.96E-05 |
| H3 Africa | ENSG00000196923 | PDLIM7     | 3.11 | 1.81E-05 |
| H3 Africa | ENSG00000174307 | PHLDA3     | 3.11 | 3.49E-04 |
| H3 Africa | ENSG00000183484 | GPR132     | 3.11 | 4.95E-08 |
| H3 Africa | ENSG00000206579 | XKR4       | 3.11 | 5.97E-05 |
| H3 Africa | ENSG00000111913 | RIPOR2     | 3.11 | 2.42E-06 |
| H3 Africa | ENSG00000090104 | RGS1       | 3.13 | 4.46E-08 |
| H3 Africa | ENSG00000144810 | COL8A1     | 3.13 | 1.03E-02 |
| H3 Africa | ENSG00000105374 | NKG7       | 3.13 | 1.07E-06 |
| H3 Africa | ENSG00000247774 | PCED1B-AS1 | 3.14 | 8.77E-09 |
| H3 Africa | ENSG00000196747 | H2AC13     | 3.15 | 1.47E-05 |
| H3 Africa | ENSG00000185201 | IFITM2     | 3.15 | 2.00E-05 |
| H3 Africa | ENSG00000168961 | LGALS9     | 3.16 | 7.50E-06 |
| H3 Africa | ENSG00000173442 | EHBP1L1    | 3.16 | 8.98E-07 |
| H3 Africa | ENSG00000138119 | MYOF       | 3.16 | 9.51E-04 |
| H3 Africa | ENSG00000077420 | APBB1IP    | 3.17 | 3.08E-02 |
| H3 Africa | ENSG00000202538 | RNU4-2     | 3.17 | 5.86E-03 |
| H3 Africa | ENSG00000176463 | SLCO3A1    | 3.17 | 5.37E-06 |
| H3 Africa | ENSG00000138772 | ANXA3      | 3.17 | 3.52E-05 |
| H3 Africa | ENSG00000011422 | PLAUR      | 3.17 | 2.74E-05 |
| H3 Africa | ENSG00000142089 | IFITM3     | 3.17 | 6.77E-06 |
| H3 Africa | ENSG00000234685 | NUS1P2     | 3.18 | 5.46E-06 |
| H3 Africa | ENSG00000020633 | RUNX3      | 3.18 | 4.08E-07 |
| H3 Africa | ENSG00000137941 | TTLL7      | 3.18 | 1.69E-04 |
| H3 Africa | ENSG00000142512 | SIGLEC10   | 3.18 | 7.62E-09 |
| H3 Africa | ENSG00000178860 | MSC        | 3.19 | 7.25E-05 |
| H3 Africa | ENSG00000100351 | GRAP2      | 3.19 | 3.45E-08 |
| H3 Africa | ENSG00000276368 | H2AC14     | 3.19 | 1.53E-05 |
| H3 Africa | ENSG00000184454 | NCMAP      | 3.19 | 9.14E-03 |
| H3 Africa | ENSG00000167208 | SNX20      | 3.19 | 6.87E-07 |
| H3 Africa | ENSG00000154734 | ADAMTS1    | 3.19 | 3.32E-03 |

|           |                 |              |      |          |
|-----------|-----------------|--------------|------|----------|
| H3 Africa | ENSG00000204257 | HLA-DMA      | 3.20 | 3.64E-06 |
| H3 Africa | ENSG00000172183 | ISG20        | 3.20 | 1.67E-06 |
| H3 Africa | ENSG00000136997 | MYC          | 3.20 | 3.58E-02 |
| H3 Africa | ENSG00000146112 | PPP1R18      | 3.20 | 1.47E-06 |
| H3 Africa | ENSG00000110934 | BIN2         | 3.20 | 5.47E-06 |
| H3 Africa | ENSG00000162745 | OLFML2B      | 3.21 | 3.88E-05 |
| H3 Africa | ENSG00000134061 | CD180        | 3.22 | 1.33E-06 |
| H3 Africa | ENSG00000163013 | FBXO41       | 3.22 | 6.09E-05 |
| H3 Africa | ENSG00000104998 | IL27RA       | 3.22 | 1.27E-06 |
| H3 Africa | ENSG00000240864 | IGKV1-16     | 3.23 | 2.04E-04 |
| H3 Africa | ENSG00000100365 | NCF4         | 3.23 | 1.32E-05 |
| H3 Africa | ENSG00000134258 | VTCN1        | 3.23 | 9.21E-05 |
| H3 Africa | ENSG00000000938 | FGR          | 3.24 | 6.25E-07 |
| H3 Africa | ENSG00000169245 | CXCL10       | 3.24 | 8.68E-04 |
| H3 Africa | ENSG00000119632 | IFI27L2      | 3.24 | 2.19E-04 |
| H3 Africa | ENSG00000137965 | IFI44        | 3.24 | 2.79E-04 |
| H3 Africa | ENSG00000138378 | STAT4        | 3.25 | 9.87E-08 |
| H3 Africa | ENSG00000163219 | ARHGAP25     | 3.25 | 2.00E-07 |
| H3 Africa | ENSG00000110719 | TCIRG1       | 3.25 | 3.01E-07 |
| H3 Africa | ENSG00000135905 | DOCK10       | 3.26 | 1.33E-06 |
| H3 Africa | ENSG00000183775 | KCTD16       | 3.26 | 8.59E-03 |
| H3 Africa | ENSG00000198851 | CD3E         | 3.26 | 1.91E-05 |
| H3 Africa | ENSG00000131042 | LILRB2       | 3.27 | 3.83E-07 |
| H3 Africa | ENSG00000211934 | IGHV1-2      | 3.27 | 1.62E-03 |
| H3 Africa | ENSG00000137393 | RNF144B      | 3.27 | 1.33E-05 |
| H3 Africa | ENSG00000132530 | XAF1         | 3.27 | 4.41E-05 |
| H3 Africa | ENSG00000211625 | IGKV3D-20    | 3.28 | 2.95E-06 |
| H3 Africa | ENSG00000125872 | LRRN4        | 3.28 | 3.37E-03 |
| H3 Africa | ENSG00000169896 | ITGAM        | 3.28 | 6.55E-08 |
| H3 Africa | ENSG00000132334 | PTPRE        | 3.28 | 4.68E-07 |
| H3 Africa | ENSG00000171700 | RGS19        | 3.28 | 1.10E-06 |
| H3 Africa | ENSG00000138061 | CYP1B1       | 3.29 | 4.27E-04 |
| H3 Africa | ENSG00000115828 | QPCT         | 3.29 | 6.98E-04 |
| H3 Africa | ENSG00000183722 | LHFPL6       | 3.30 | 5.46E-06 |
| H3 Africa | ENSG00000101096 | NFATC2       | 3.30 | 8.70E-08 |
| H3 Africa | ENSG00000134955 | SLC37A2      | 3.30 | 3.88E-07 |
| H3 Africa | ENSG00000155307 | SAMSN1       | 3.30 | 7.69E-07 |
| H3 Africa | ENSG00000180353 | HCLS1        | 3.31 | 5.44E-09 |
| H3 Africa | ENSG00000106546 | AHR          | 3.31 | 2.05E-06 |
| H3 Africa | ENSG00000174939 | ASPHD1       | 3.31 | 2.34E-05 |
| H3 Africa | ENSG00000146263 | MMS22L       | 3.32 | 2.30E-06 |
| H3 Africa | ENSG00000172236 | TPSAB1/TPSB2 | 3.32 | 1.93E-04 |
| H3 Africa | ENSG00000187608 | ISG15        | 3.32 | 1.91E-03 |
| H3 Africa | ENSG00000166147 | FBN1         | 3.33 | 9.10E-05 |
| H3 Africa | ENSG00000152527 | PLEKHH2      | 3.33 | 3.51E-04 |
| H3 Africa | ENSG00000138735 | PDE5A        | 3.34 | 5.29E-06 |
| H3 Africa | ENSG00000089820 | ARHGAP4      | 3.34 | 4.76E-07 |
| H3 Africa | ENSG00000252010 | SCARNA5      | 3.34 | 2.85E-02 |
| H3 Africa | ENSG00000198959 | TGM2         | 3.35 | 2.41E-02 |
| H3 Africa | ENSG00000099282 | TSPAN15      | 3.35 | 9.38E-07 |
| H3 Africa | ENSG00000162894 | FCMR         | 3.35 | 5.28E-09 |
| H3 Africa | ENSG00000172349 | IL16         | 3.35 | 6.29E-07 |
| H3 Africa | ENSG00000115641 | FHL2         | 3.36 | 6.36E-05 |

|           |                 |               |      |          |
|-----------|-----------------|---------------|------|----------|
| H3 Africa | ENSG00000171659 | GPR34         | 3.36 | 8.53E-06 |
| H3 Africa | ENSG00000177575 | CD163         | 3.37 | 2.93E-05 |
| H3 Africa | ENSG00000102007 | PLP2          | 3.37 | 4.91E-06 |
| H3 Africa | ENSG00000168071 | CCDC88B       | 3.37 | 5.76E-06 |
| H3 Africa | ENSG00000121361 | KCNJ8         | 3.37 | 6.12E-05 |
| H3 Africa | ENSG00000118849 | RARRES1       | 3.37 | 7.38E-04 |
| H3 Africa | ENSG00000160255 | ITGB2         | 3.37 | 1.48E-05 |
| H3 Africa | ENSG00000150551 | LYPD1         | 3.38 | 5.23E-05 |
| H3 Africa | ENSG00000274641 | H2BC17        | 3.38 | 2.53E-05 |
| H3 Africa | ENSG00000273983 | H3C8          | 3.38 | 1.15E-05 |
| H3 Africa | ENSG00000206337 | HCP5          | 3.38 | 3.94E-06 |
| H3 Africa | ENSG00000196735 | HLA-DQA1      | 3.38 | 7.75E-03 |
| H3 Africa | ENSG00000136514 | RTP4          | 3.38 | 3.60E-06 |
| H3 Africa | ENSG00000054967 | RELT          | 3.39 | 3.15E-06 |
| H3 Africa | ENSG00000126860 | EVI2A         | 3.39 | 2.39E-06 |
| H3 Africa | ENSG00000113088 | GZMK          | 3.39 | 5.66E-09 |
| H3 Africa | ENSG00000050344 | NFE2L3        | 3.39 | 8.35E-05 |
| H3 Africa | ENSG00000133048 | CHI3L1        | 3.39 | 6.04E-04 |
| H3 Africa | ENSG00000100097 | LGALS1        | 3.40 | 4.11E-04 |
| H3 Africa | ENSG00000155659 | VSIG4         | 3.40 | 1.37E-05 |
| H3 Africa | ENSG00000204252 | HLA-DOA       | 3.40 | 3.27E-03 |
| H3 Africa | ENSG00000139178 | C1RL          | 3.40 | 1.14E-05 |
| H3 Africa | ENSG00000078098 | FAP           | 3.41 | 1.16E-07 |
| H3 Africa | ENSG00000141524 | TMC6          | 3.41 | 3.52E-05 |
| H3 Africa | ENSG00000115165 | CYTIP         | 3.41 | 9.41E-07 |
| H3 Africa | ENSG00000154645 | CHODL         | 3.42 | 3.40E-04 |
| H3 Africa | ENSG00000133816 | MICAL2        | 3.42 | 7.55E-04 |
| H3 Africa | ENSG00000130755 | GMFG          | 3.42 | 3.74E-06 |
| H3 Africa | ENSG00000072694 | FCGR2B        | 3.43 | 7.06E-08 |
| H3 Africa | ENSG00000133063 | CHIT1         | 3.43 | 4.06E-02 |
| H3 Africa | ENSG00000111348 | ARHGDI1       | 3.43 | 4.46E-08 |
| H3 Africa | ENSG00000197471 | SPN           | 3.43 | 1.96E-05 |
| H3 Africa | ENSG00000104972 | LILRB1        | 3.44 | 2.42E-06 |
| H3 Africa | ENSG00000188820 | CALHM6        | 3.44 | 1.02E-08 |
| H3 Africa | ENSG00000070190 | DAPP1         | 3.45 | 7.15E-08 |
| H3 Africa | ENSG00000185885 | IFITM1        | 3.46 | 2.61E-06 |
| H3 Africa | ENSG00000240065 | PSMB9         | 3.46 | 4.46E-07 |
| H3 Africa | ENSG00000101265 | RASSF2        | 3.46 | 1.83E-05 |
| H3 Africa | ENSG00000205045 | SLFN12L       | 3.46 | 1.16E-06 |
| H3 Africa | ENSG00000136732 | GYPC          | 3.47 | 3.92E-06 |
| H3 Africa | ENSG00000159753 | CARMIL2       | 3.48 | 1.02E-08 |
| H3 Africa | ENSG00000100385 | IL2RB         | 3.48 | 1.48E-05 |
| H3 Africa | ENSG00000213654 | GPSM3         | 3.48 | 5.66E-09 |
| H3 Africa | ENSG00000100092 | SH3BP1        | 3.48 | 1.00E-07 |
| H3 Africa | ENSG00000159403 | C1R           | 3.49 | 3.77E-05 |
| H3 Africa | ENSG00000179583 | CIITA         | 3.49 | 1.48E-07 |
| H3 Africa | ENSG00000082014 | SMARCD3       | 3.49 | 2.58E-05 |
| H3 Africa | ENSG00000135074 | ADAM19        | 3.49 | 1.20E-07 |
| H3 Africa | ENSG00000160190 | SLC37A1       | 3.49 | 1.94E-05 |
| H3 Africa | ENSG00000010327 | STAB1         | 3.50 | 3.63E-05 |
| H3 Africa | ENSG00000205542 | TMSB10/TMSB4X | 3.50 | 1.33E-06 |
| H3 Africa | ENSG00000137841 | PLCB2         | 3.50 | 3.72E-06 |
| H3 Africa | ENSG00000162981 | LRATD1        | 3.51 | 7.29E-06 |

|           |                 |               |      |          |
|-----------|-----------------|---------------|------|----------|
| H3 Africa | ENSG00000263961 | RHEX          | 3.51 | 6.16E-03 |
| H3 Africa | ENSG00000137959 | IFI44L        | 3.51 | 2.16E-03 |
| H3 Africa | ENSG00000196154 | S100A4        | 3.52 | 2.86E-07 |
| H3 Africa | ENSG00000028137 | TNFRSF1B      | 3.52 | 2.60E-07 |
| H3 Africa | ENSG00000101333 | PLCB4         | 3.52 | 2.29E-04 |
| H3 Africa | ENSG00000127152 | BCL11B        | 3.52 | 3.16E-07 |
| H3 Africa | ENSG00000064886 | CHI3L2        | 3.52 | 1.58E-07 |
| H3 Africa | ENSG00000164294 | GPX8          | 3.52 | 6.50E-05 |
| H3 Africa | ENSG00000145287 | PLAC8         | 3.52 | 1.42E-08 |
| H3 Africa | ENSG00000034053 | APBA2         | 3.53 | 4.90E-06 |
| H3 Africa | ENSG00000265185 | SNORD3B-1     | 3.53 | 3.12E-04 |
| H3 Africa | ENSG00000141506 | PIK3R5        | 3.54 | 1.00E-07 |
| H3 Africa | ENSG00000150337 | FCGR1A        | 3.54 | 1.07E-08 |
| H3 Africa | ENSG00000026025 | VIM           | 3.54 | 5.92E-04 |
| H3 Africa | ENSG00000176014 | TUBB6         | 3.56 | 2.72E-06 |
| H3 Africa | ENSG00000088827 | SIGLEC1       | 3.56 | 1.37E-04 |
| H3 Africa | ENSG00000275379 | H3C11         | 3.57 | 2.39E-07 |
| H3 Africa | ENSG00000158714 | SLAMF8        | 3.57 | 1.10E-07 |
| H3 Africa | ENSG00000204287 | HLA-DRA       | 3.58 | 4.73E-06 |
| H3 Africa | ENSG00000115085 | ZAP70         | 3.58 | 1.09E-05 |
| H3 Africa | ENSG00000100368 | CSF2RB        | 3.58 | 5.05E-07 |
| H3 Africa | ENSG00000023902 | PLEKHO1       | 3.59 | 1.11E-05 |
| H3 Africa | ENSG00000065357 | DGKA          | 3.59 | 1.26E-07 |
| H3 Africa | ENSG00000154760 | SLFN13        | 3.59 | 5.69E-05 |
| H3 Africa | ENSG00000000971 | CFH           | 3.60 | 1.76E-05 |
| H3 Africa | ENSG00000168329 | CX3CR1        | 3.61 | 5.68E-06 |
| H3 Africa | ENSG00000277443 | MARCKS        | 3.62 | 2.65E-07 |
| H3 Africa | ENSG00000140030 | GPR65         | 3.62 | 2.60E-08 |
| H3 Africa | ENSG00000171560 | FGA           | 3.62 | 5.48E-03 |
| H3 Africa | ENSG00000140931 | CMTM3         | 3.63 | 2.87E-05 |
| H3 Africa | ENSG00000182718 | ANXA2         | 3.64 | 2.68E-04 |
| H3 Africa | ENSG00000169403 | PTAFR         | 3.64 | 1.71E-06 |
| H3 Africa | ENSG00000101916 | TLR8          | 3.64 | 1.33E-07 |
| H3 Africa | ENSG00000086730 | LAT2          | 3.64 | 8.98E-07 |
| H3 Africa | ENSG00000204472 | AIF1          | 3.65 | 1.11E-04 |
| H3 Africa | ENSG00000146192 | FGD2          | 3.65 | 5.56E-06 |
| H3 Africa | ENSG00000100196 | KDELR3        | 3.65 | 1.60E-05 |
| H3 Africa | ENSG00000146242 | TPBG          | 3.66 | 2.22E-07 |
| H3 Africa | ENSG00000119535 | CSF3R         | 3.66 | 1.14E-05 |
| H3 Africa | ENSG00000048052 | HDAC9         | 3.67 | 3.45E-06 |
| H3 Africa | ENSG00000170006 | TMEM154       | 3.67 | 2.87E-09 |
| H3 Africa | ENSG00000072818 | ACAP1         | 3.69 | 4.00E-07 |
| H3 Africa | ENSG00000137573 | SULF1         | 3.69 | 3.46E-04 |
| H3 Africa | ENSG00000078081 | LAMP3         | 3.69 | 4.46E-08 |
| H3 Africa | ENSG00000174938 | SEZ6L2        | 3.69 | 1.04E-02 |
| H3 Africa | ENSG00000099725 | PRKY          | 3.70 | 2.68E-04 |
| H3 Africa | ENSG00000239713 | APOBEC3G      | 3.70 | 2.00E-07 |
| H3 Africa | ENSG00000111796 | KLRB1         | 3.70 | 1.58E-07 |
| H3 Africa | ENSG00000120708 | TGFBI         | 3.71 | 4.21E-06 |
| H3 Africa | ENSG00000090339 | ICAM1         | 3.72 | 1.85E-03 |
| H3 Africa | ENSG00000186818 | LILRB4        | 3.72 | 2.87E-09 |
| H3 Africa | ENSG00000006118 | TMEM132A      | 3.73 | 2.98E-04 |
| H3 Africa | ENSG00000203747 | FCGR3A/FCGR3B | 3.74 | 1.75E-04 |

|           |                 |           |      |          |
|-----------|-----------------|-----------|------|----------|
| H3 Africa | ENSG00000113263 | ITK       | 3.75 | 3.00E-08 |
| H3 Africa | ENSG00000164764 | SBSPON    | 3.75 | 1.34E-03 |
| H3 Africa | ENSG00000167286 | CD3D      | 3.75 | 7.06E-08 |
| H3 Africa | ENSG00000277775 | H3C7      | 3.76 | 6.84E-06 |
| H3 Africa | ENSG00000198535 | C2CD4A    | 3.76 | 2.27E-03 |
| H3 Africa | ENSG00000164694 | FNDC1     | 3.76 | 1.06E-03 |
| H3 Africa | ENSG00000096433 | ITPR3     | 3.76 | 1.53E-04 |
| H3 Africa | ENSG00000111341 | MGP       | 3.76 | 1.15E-03 |
| H3 Africa | ENSG00000066336 | SPI1      | 3.76 | 7.62E-09 |
| H3 Africa | ENSG00000233901 | LINC01503 | 3.77 | 6.23E-06 |
| H3 Africa | ENSG00000105122 | RASAL3    | 3.78 | 6.55E-08 |
| H3 Africa | ENSG00000182326 | C1S       | 3.78 | 3.63E-05 |
| H3 Africa | ENSG00000123329 | ARHGAP9   | 3.79 | 1.95E-07 |
| H3 Africa | ENSG00000160791 | CCR5      | 3.80 | 1.85E-08 |
| H3 Africa | ENSG00000159212 | CLIC6     | 3.80 | 1.37E-05 |
| H3 Africa | ENSG00000275620 | FLJ16779  | 3.80 | 7.40E-04 |
| H3 Africa | ENSG00000145649 | GZMA      | 3.80 | 1.81E-08 |
| H3 Africa | ENSG00000122694 | GLIPR2    | 3.81 | 1.20E-08 |
| H3 Africa | ENSG00000023445 | BIRC3     | 3.81 | 2.89E-05 |
| H3 Africa | ENSG00000116183 | PAPPA2    | 3.82 | 1.07E-02 |
| H3 Africa | ENSG00000069493 | CLEC2D    | 3.82 | 7.83E-07 |
| H3 Africa | ENSG00000156011 | PSD3      | 3.83 | 8.45E-07 |
| H3 Africa | ENSG00000155926 | SLA       | 3.83 | 1.41E-07 |
| H3 Africa | ENSG00000013725 | CD6       | 3.84 | 5.40E-08 |
| H3 Africa | ENSG00000066279 | ASPM      | 3.85 | 1.98E-03 |
| H3 Africa | ENSG00000204291 | COL15A1   | 3.87 | 3.25E-04 |
| H3 Africa | ENSG00000211660 | IGLV2-23  | 3.87 | 7.21E-04 |
| H3 Africa | ENSG00000130635 | COL5A1    | 3.89 | 4.07E-05 |
| H3 Africa | ENSG00000140368 | PSTPIP1   | 3.89 | 2.60E-07 |
| H3 Africa | ENSG00000106537 | TSPAN13   | 3.90 | 1.80E-08 |
| H3 Africa | ENSG00000162645 | GBP2      | 3.91 | 5.96E-05 |
| H3 Africa | ENSG00000153563 | CD8A      | 3.91 | 1.83E-05 |
| H3 Africa | ENSG00000182866 | LCK       | 3.93 | 1.45E-07 |
| H3 Africa | ENSG00000130508 | PXDN      | 3.93 | 7.65E-04 |
| H3 Africa | ENSG00000116701 | NCF2      | 3.94 | 2.90E-08 |
| H3 Africa | ENSG00000179639 | FCER1A    | 3.95 | 8.26E-06 |
| H3 Africa | ENSG00000091986 | CCDC80    | 3.96 | 4.62E-05 |
| H3 Africa | ENSG00000176170 | SPHK1     | 3.98 | 5.25E-05 |
| H3 Africa | ENSG00000159189 | C1QC      | 3.99 | 4.43E-05 |
| H3 Africa | ENSG00000225217 | HSPA7     | 3.99 | 3.01E-07 |
| H3 Africa | ENSG00000122122 | SASH3     | 3.99 | 1.92E-06 |
| H3 Africa | ENSG00000171860 | C3AR1     | 4.00 | 8.66E-09 |
| H3 Africa | ENSG00000166927 | MS4A7     | 4.01 | 1.29E-05 |
| H3 Africa | ENSG00000137558 | PI15      | 4.01 | 9.66E-07 |
| H3 Africa | ENSG00000005059 | MCUB      | 4.01 | 3.88E-07 |
| H3 Africa | ENSG00000131747 | TOP2A     | 4.02 | 1.60E-02 |
| H3 Africa | ENSG00000211772 | TRBC2     | 4.02 | 2.29E-07 |
| H3 Africa | ENSG00000185862 | EVI2B     | 4.02 | 2.87E-09 |
| H3 Africa | ENSG00000188404 | SELL      | 4.02 | 2.86E-07 |
| H3 Africa | ENSG00000139329 | LUM       | 4.03 | 6.68E-05 |
| H3 Africa | ENSG00000127507 | ADGRE2    | 4.03 | 2.87E-09 |
| H3 Africa | ENSG00000116132 | PRRX1     | 4.03 | 2.39E-08 |
| H3 Africa | ENSG00000106948 | AKNA      | 4.03 | 8.28E-08 |

|           |                 |               |      |          |
|-----------|-----------------|---------------|------|----------|
| H3 Africa | ENSG00000137077 | CCL21         | 4.03 | 1.49E-04 |
| H3 Africa | ENSG00000132274 | TRIM22        | 4.03 | 9.62E-07 |
| H3 Africa | ENSG00000211598 | IGKV4-1       | 4.04 | 2.34E-02 |
| H3 Africa | ENSG00000113532 | ST8SIA4       | 4.04 | 2.15E-08 |
| H3 Africa | ENSG00000089639 | GMIP          | 4.04 | 1.42E-08 |
| H3 Africa | ENSG00000158481 | CD1C          | 4.05 | 3.30E-07 |
| H3 Africa | ENSG00000154237 | LRRK1         | 4.05 | 5.12E-07 |
| H3 Africa | ENSG00000053747 | LAMA3         | 4.05 | 3.67E-05 |
| H3 Africa | ENSG00000079931 | MOXD1         | 4.05 | 1.04E-03 |
| H3 Africa | ENSG00000252835 | SCARNA21      | 4.06 | 7.61E-04 |
| H3 Africa | ENSG00000163751 | CPA3          | 4.07 | 6.06E-05 |
| H3 Africa | ENSG00000182578 | CSF1R         | 4.07 | 1.08E-06 |
| H3 Africa | ENSG00000101198 | NKAIN4        | 4.07 | 4.85E-03 |
| H3 Africa | ENSG00000101347 | SAMHD1        | 4.08 | 1.32E-08 |
| H3 Africa | ENSG00000172673 | THEMIS        | 4.08 | 8.66E-09 |
| H3 Africa | ENSG00000177989 | ODF3B         | 4.10 | 2.24E-06 |
| H3 Africa | ENSG00000116852 | KIF21B        | 4.10 | 2.67E-07 |
| H3 Africa | ENSG00000196754 | S100A2        | 4.12 | 4.67E-05 |
| H3 Africa | ENSG00000101336 | HCK           | 4.14 | 1.98E-07 |
| H3 Africa | ENSG00000110492 | MDK           | 4.14 | 1.11E-03 |
| H3 Africa | ENSG00000188042 | ARL4C         | 4.15 | 1.59E-04 |
| H3 Africa | ENSG00000115226 | FNDC4         | 4.15 | 2.76E-06 |
| H3 Africa | ENSG00000131771 | PPP1R1B       | 4.15 | 7.71E-04 |
| H3 Africa | ENSG00000135842 | NIBAN1        | 4.15 | 1.17E-05 |
| H3 Africa | ENSG00000167552 | TUBA1A        | 4.15 | 7.82E-05 |
| H3 Africa | ENSG00000023892 | DEF6          | 4.16 | 4.04E-09 |
| H3 Africa | ENSG00000153283 | CD96          | 4.16 | 8.66E-09 |
| H3 Africa | ENSG00000184922 | FMNL1         | 4.17 | 1.02E-08 |
| H3 Africa | ENSG00000159674 | SPON2         | 4.17 | 1.56E-03 |
| H3 Africa | ENSG00000187474 | FPR3          | 4.18 | 3.04E-08 |
| H3 Africa | ENSG00000227507 | LTB           | 4.21 | 1.98E-08 |
| H3 Africa | ENSG00000211751 | TRBC1         | 4.21 | 5.00E-09 |
| H3 Africa | ENSG00000029153 | ARNTL2        | 4.22 | 8.28E-06 |
| H3 Africa | ENSG00000025708 | TYMP          | 4.22 | 4.24E-06 |
| H3 Africa | ENSG00000148773 | MKI67         | 4.22 | 3.06E-02 |
| H3 Africa | ENSG00000163347 | CLDN1         | 4.23 | 2.44E-04 |
| H3 Africa | ENSG00000130775 | THEMIS2       | 4.23 | 4.55E-07 |
| H3 Africa | ENSG00000180448 | ARHGAP45      | 4.24 | 2.13E-07 |
| H3 Africa | ENSG00000136286 | MYO1G         | 4.24 | 7.97E-06 |
| H3 Africa | ENSG00000166428 | PLD4          | 4.24 | 2.15E-08 |
| H3 Africa | ENSG00000175463 | TBC1D10C      | 4.24 | 2.51E-08 |
| H3 Africa | ENSG00000200087 | SNORA73B      | 4.25 | 6.34E-04 |
| H3 Africa | ENSG00000034510 | TMSB10/TMSB4X | 4.25 | 1.48E-05 |
| H3 Africa | ENSG00000172724 | CCL19         | 4.27 | 2.65E-06 |
| H3 Africa | ENSG00000168918 | INPP5D        | 4.28 | 2.26E-08 |
| H3 Africa | ENSG00000145623 | OSMR          | 4.29 | 1.04E-04 |
| H3 Africa | ENSG00000110324 | IL10RA        | 4.29 | 6.88E-07 |
| H3 Africa | ENSG00000006327 | TNFRSF12A     | 4.29 | 9.75E-04 |
| H3 Africa | ENSG00000162706 | CADM3         | 4.30 | 5.81E-04 |
| H3 Africa | ENSG00000204482 | LST1          | 4.30 | 1.13E-06 |
| H3 Africa | ENSG00000242574 | HLA-DMB       | 4.32 | 2.65E-07 |
| H3 Africa | ENSG00000164691 | TAGAP         | 4.33 | 7.62E-09 |
| H3 Africa | ENSG00000244414 | CFHR1         | 4.33 | 4.73E-06 |

|           |                 |             |      |          |
|-----------|-----------------|-------------|------|----------|
| H3 Africa | ENSG00000173369 | C1QB        | 4.35 | 3.91E-06 |
| H3 Africa | ENSG00000010671 | BTK         | 4.37 | 2.87E-09 |
| H3 Africa | ENSG00000243466 | IGKV1-5     | 4.38 | 5.76E-03 |
| H3 Africa | ENSG00000088992 | TESC        | 4.38 | 2.09E-05 |
| H3 Africa | ENSG00000198286 | CARD11      | 4.40 | 2.87E-09 |
| H3 Africa | ENSG00000104894 | CD37        | 4.40 | 3.31E-08 |
| H3 Africa | ENSG00000121281 | ADCY7       | 4.42 | 6.55E-08 |
| H3 Africa | ENSG00000026751 | SLAMF7      | 4.43 | 1.12E-06 |
| H3 Africa | ENSG00000145416 | MARCHF1     | 4.43 | 3.29E-07 |
| H3 Africa | ENSG00000122641 | INHBA       | 4.44 | 2.49E-07 |
| H3 Africa | ENSG00000134115 | CNTN6       | 4.45 | 6.68E-06 |
| H3 Africa | ENSG00000141968 | VAV1        | 4.45 | 1.97E-07 |
| H3 Africa | ENSG00000142347 | MYO1F       | 4.45 | 2.87E-09 |
| H3 Africa | ENSG00000081320 | STK17B      | 4.47 | 1.53E-08 |
| H3 Africa | ENSG00000118971 | CCND2       | 4.47 | 2.04E-05 |
| H3 Africa | ENSG00000211945 | IGHV1-18    | 4.47 | 3.58E-06 |
| H3 Africa | ENSG00000066294 | CD84        | 4.47 | 1.02E-08 |
| H3 Africa | ENSG00000173372 | C1QA        | 4.48 | 1.49E-06 |
| H3 Africa | ENSG00000222041 | CYTOR       | 4.48 | 4.30E-06 |
| H3 Africa | ENSG00000172965 | MIR4435-2HG | 4.49 | 7.03E-05 |
| H3 Africa | ENSG00000271503 | CCL5        | 4.51 | 3.94E-06 |
| H3 Africa | ENSG00000102524 | TNFSF13B    | 4.51 | 1.59E-07 |
| H3 Africa | ENSG00000144452 | ABCA12      | 4.52 | 1.15E-05 |
| H3 Africa | ENSG00000132205 | EMILIN2     | 4.52 | 1.54E-07 |
| H3 Africa | ENSG00000274997 | H2AC12      | 4.52 | 1.42E-07 |
| H3 Africa | ENSG00000197629 | MPEG1       | 4.55 | 5.08E-07 |
| H3 Africa | ENSG00000188596 | CFAP54      | 4.55 | 1.31E-06 |
| H3 Africa | ENSG00000167613 | LAIR1       | 4.57 | 1.32E-08 |
| H3 Africa | ENSG00000105851 | PIK3CG      | 4.57 | 1.02E-08 |
| H3 Africa | ENSG00000196664 | TLR7        | 4.59 | 3.02E-09 |
| H3 Africa | ENSG00000026508 | CD44        | 4.61 | 4.60E-08 |
| H3 Africa | ENSG00000105639 | JAK3        | 4.63 | 2.67E-07 |
| H3 Africa | ENSG00000122862 | SRGN        | 4.63 | 1.30E-07 |
| H3 Africa | ENSG00000211673 | IGLV3-1     | 4.68 | 4.51E-07 |
| H3 Africa | ENSG00000196787 | H2AC11      | 4.69 | 4.57E-06 |
| H3 Africa | ENSG00000108691 | CCL2        | 4.69 | 6.26E-06 |
| H3 Africa | ENSG00000163565 | IFI16       | 4.69 | 1.79E-07 |
| H3 Africa | ENSG00000100055 | CYTH4       | 4.72 | 3.00E-08 |
| H3 Africa | ENSG00000132514 | CLEC10A     | 4.72 | 1.38E-06 |
| H3 Africa | ENSG00000115232 | ITGA4       | 4.73 | 5.94E-07 |
| H3 Africa | ENSG00000139973 | SYT16       | 4.74 | 1.03E-05 |
| H3 Africa | ENSG00000172243 | CLEC7A      | 4.75 | 2.87E-09 |
| H3 Africa | ENSG00000186517 | ARHGAP30    | 4.77 | 2.60E-07 |
| H3 Africa | ENSG00000138964 | PARVG       | 4.78 | 1.19E-08 |
| H3 Africa | ENSG00000038945 | MSR1        | 4.80 | 1.95E-07 |
| H3 Africa | ENSG00000108821 | COL1A1      | 4.81 | 5.20E-04 |
| H3 Africa | ENSG00000166501 | PRKCB       | 4.82 | 1.20E-07 |
| H3 Africa | ENSG00000137752 | CASP1       | 4.84 | 1.07E-08 |
| H3 Africa | ENSG00000169429 | CXCL8       | 4.84 | 1.88E-06 |
| H3 Africa | ENSG00000130592 | LSP1        | 4.86 | 8.70E-08 |
| H3 Africa | ENSG00000149781 | FERMT3      | 4.87 | 7.62E-09 |
| H3 Africa | ENSG00000167895 | TMC8        | 4.90 | 1.37E-08 |
| H3 Africa | ENSG00000116824 | CD2         | 4.90 | 1.02E-08 |

|           |                 |          |      |          |
|-----------|-----------------|----------|------|----------|
| H3 Africa | ENSG00000136490 | LIMD2    | 4.91 | 1.19E-08 |
| H3 Africa | ENSG00000115956 | PLEK     | 4.91 | 2.15E-08 |
| H3 Africa | ENSG00000140749 | IGSF6    | 4.92 | 1.02E-08 |
| H3 Africa | ENSG00000231389 | HLA-DPA1 | 4.94 | 1.58E-06 |
| H3 Africa | ENSG00000058085 | LAMC2    | 4.95 | 1.56E-03 |
| H3 Africa | ENSG00000106541 | AGR2     | 4.97 | 4.24E-04 |
| H3 Africa | ENSG00000001626 | CFTR     | 4.97 | 8.26E-06 |
| H3 Africa | ENSG00000135046 | ANXA1    | 5.01 | 9.39E-06 |
| H3 Africa | ENSG00000159216 | RUNX1    | 5.01 | 6.55E-08 |
| H3 Africa | ENSG00000121807 | CCR2     | 5.03 | 2.51E-08 |
| H3 Africa | ENSG00000148848 | ADAM12   | 5.04 | 2.15E-08 |
| H3 Africa | ENSG00000075884 | ARHGAP15 | 5.04 | 2.63E-07 |
| H3 Africa | ENSG00000124575 | H1-3     | 5.05 | 1.49E-07 |
| H3 Africa | ENSG00000002587 | HS3ST1   | 5.05 | 6.01E-06 |
| H3 Africa | ENSG00000147168 | IL2RG    | 5.05 | 2.87E-09 |
| H3 Africa | ENSG00000154451 | GBP5     | 5.07 | 2.75E-08 |
| H3 Africa | ENSG00000162687 | KCNT2    | 5.10 | 3.08E-06 |
| H3 Africa | ENSG00000043462 | LCP2     | 5.10 | 4.25E-09 |
| H3 Africa | ENSG00000140968 | IRF8     | 5.12 | 8.73E-07 |
| H3 Africa | ENSG00000115386 | REG1A    | 5.12 | 3.37E-02 |
| H3 Africa | ENSG00000114270 | COL7A1   | 5.16 | 4.11E-05 |
| H3 Africa | ENSG00000128340 | RAC2     | 5.16 | 1.66E-08 |
| H3 Africa | ENSG00000170571 | EMB      | 5.16 | 4.33E-09 |
| H3 Africa | ENSG00000165168 | CYBB     | 5.21 | 3.05E-07 |
| H3 Africa | ENSG00000244437 | IGKV3-15 | 5.21 | 1.83E-05 |
| H3 Africa | ENSG00000011600 | TYROBP   | 5.26 | 3.45E-08 |
| H3 Africa | ENSG00000041982 | TNC      | 5.27 | 1.34E-03 |
| H3 Africa | ENSG00000198223 | CSF2RA   | 5.29 | 2.87E-09 |
| H3 Africa | ENSG00000223865 | HLA-DPB1 | 5.33 | 2.54E-08 |
| H3 Africa | ENSG00000144802 | NFKBIZ   | 5.35 | 1.41E-06 |
| H3 Africa | ENSG00000007062 | PROM1    | 5.35 | 1.43E-04 |
| H3 Africa | ENSG00000134516 | DOCK2    | 5.36 | 1.80E-08 |
| H3 Africa | ENSG00000123338 | NCKAP1L  | 5.39 | 2.87E-09 |
| H3 Africa | ENSG00000185774 | KCNIP4   | 5.40 | 5.50E-08 |
| H3 Africa | ENSG00000185811 | IKZF1    | 5.40 | 2.51E-08 |
| H3 Africa | ENSG00000134242 | PTPN22   | 5.46 | 5.66E-09 |
| H3 Africa | ENSG00000170579 | DLGAP1   | 5.47 | 3.42E-04 |
| H3 Africa | ENSG00000102265 | TIMP1    | 5.48 | 1.19E-05 |
| H3 Africa | ENSG00000139278 | GLIPR1   | 5.56 | 9.25E-09 |
| H3 Africa | ENSG00000005844 | ITGAL    | 5.59 | 7.06E-08 |
| H3 Africa | ENSG00000168542 | COL3A1   | 5.62 | 4.96E-05 |
| H3 Africa | ENSG00000160593 | JAML     | 5.65 | 2.75E-08 |
| H3 Africa | ENSG00000163131 | CTSS     | 5.66 | 1.91E-07 |
| H3 Africa | ENSG00000163220 | S100A9   | 5.68 | 3.47E-06 |
| H3 Africa | ENSG00000161405 | IKZF3    | 5.70 | 2.41E-07 |
| H3 Africa | ENSG00000162511 | LAPTM5   | 5.71 | 5.66E-09 |
| H3 Africa | ENSG00000148346 | LCN2     | 5.73 | 1.03E-04 |
| H3 Africa | ENSG00000237541 | HLA-DQA2 | 5.76 | 1.44E-04 |
| H3 Africa | ENSG00000105825 | TFPI2    | 5.76 | 3.55E-04 |
| H3 Africa | ENSG00000168685 | IL7R     | 5.82 | 4.20E-07 |
| H3 Africa | ENSG00000110077 | MS4A6A   | 5.88 | 3.67E-07 |
| H3 Africa | ENSG00000241755 | IGKV1-9  | 5.90 | 2.63E-07 |
| H3 Africa | ENSG00000211893 | IGHG2    | 5.91 | 4.13E-02 |



|           |                 |          |       |          |
|-----------|-----------------|----------|-------|----------|
| H3 Africa | ENSG00000163739 | CXCL1    | 5.93  | 2.56E-06 |
| H3 Africa | ENSG00000047457 | CP       | 5.99  | 2.03E-05 |
| H3 Africa | ENSG00000136250 | AOAH     | 6.12  | 2.87E-09 |
| H3 Africa | ENSG00000171236 | LRG1     | 6.13  | 2.68E-04 |
| H3 Africa | ENSG00000184557 | SOCS3    | 6.28  | 2.61E-05 |
| H3 Africa | ENSG00000241351 | IGKV3-11 | 6.31  | 4.18E-05 |
| H3 Africa | ENSG00000102879 | CORO1A   | 6.33  | 2.51E-08 |
| H3 Africa | ENSG00000143119 | CD53     | 6.34  | 2.87E-09 |
| H3 Africa | ENSG00000186340 | THBS2    | 6.34  | 2.65E-04 |
| H3 Africa | ENSG00000077274 | CAPN6    | 6.43  | 2.77E-04 |
| H3 Africa | ENSG00000244682 | FCGR2C   | 6.43  | 4.71E-07 |
| H3 Africa | ENSG00000136167 | LCP1     | 6.52  | 1.42E-08 |
| H3 Africa | ENSG00000171476 | HOPX     | 6.54  | 4.57E-06 |
| H3 Africa | ENSG00000006128 | TAC1     | 6.61  | 3.81E-06 |
| H3 Africa | ENSG00000140678 | ITGAX    | 6.67  | 7.62E-09 |
| H3 Africa | ENSG00000132465 | JCHAIN   | 6.71  | 2.12E-03 |
| H3 Africa | ENSG00000184357 | H1-5     | 6.83  | 2.07E-08 |
| H3 Africa | ENSG00000133110 | POSTN    | 6.87  | 2.96E-04 |
| H3 Africa | ENSG00000081237 | PTPRC    | 6.90  | 1.24E-08 |
| H3 Africa | ENSG00000113249 | HAVCR1   | 6.95  | 2.97E-03 |
| H3 Africa | ENSG00000117091 | CD48     | 7.30  | 3.45E-08 |
| H3 Africa | ENSG00000137673 | MMP7     | 7.32  | 2.61E-03 |
| H3 Africa | ENSG00000012779 | ALOX5    | 7.64  | 1.37E-08 |
| H3 Africa | ENSG00000124875 | CXCL6    | 8.11  | 2.87E-09 |
| H3 Africa | ENSG00000101443 | WFDC2    | 8.12  | 9.49E-06 |
| H3 Africa | ENSG00000124107 | SLPI     | 8.15  | 2.35E-04 |
| H3 Africa | ENSG00000171564 | FGB      | 8.25  | 3.36E-03 |
| H3 Africa | ENSG00000211592 | IGKC     | 8.41  | 2.61E-02 |
| H3 Africa | ENSG00000211899 | IGHM     | 8.92  | 1.65E-02 |
| H3 Africa | ENSG00000169442 | CD52     | 8.93  | 2.87E-09 |
| H3 Africa | ENSG00000157765 | SLC34A2  | 9.22  | 6.22E-04 |
| H3 Africa | ENSG00000125730 | C3       | 10.37 | 4.08E-04 |
| H3 Africa | ENSG00000115221 | ITGB6    | 10.56 | 3.06E-05 |
| H3 Africa | ENSG00000157890 | MEGF11   | 11.24 | 1.02E-04 |
| H3 Africa | ENSG00000090382 | LYZ      | 12.87 | 2.87E-09 |
| H3 Africa | ENSG00000038427 | VCAN     | 16.85 | 1.50E-06 |
| H3 Africa | ENSG00000211892 | IGHG4    | 22.27 | 2.86E-07 |
| H3 Africa | ENSG00000166741 | NNMT     | 22.88 | 6.16E-08 |
| H3 Africa | ENSG00000012223 | LTF      | 24.49 | 2.19E-04 |
| ERCB      | 5340            | PLG      | -4.10 | 1.05E-04 |
| ERCB      | 213             | ALB      | -3.84 | 1.01E-02 |
| ERCB      | 2538            | G6PC     | -3.72 | 1.71E-04 |
| ERCB      | 2938            | GSTA1    | -3.66 | 8.40E-05 |
| ERCB      | 26              | AOC1     | -3.36 | 4.18E-05 |
| ERCB      | 51733           | UPB1     | -3.29 | 1.09E-05 |
| ERCB      | 84619           | ZGPAT    | -3.15 | 3.30E-05 |
| ERCB      | 27329           | ANGPTL3  | -3.11 | 6.31E-05 |
| ERCB      | 3242            | HPD      | -3.10 | 1.08E-03 |
| ERCB      | 173             | AFM      | -3.06 | 1.12E-04 |
| ERCB      | 189             | AGXT     | -2.98 | 2.86E-03 |
| ERCB      | 866             | SERPINA6 | -2.86 | 9.39E-06 |
| ERCB      | 350             | APOH     | -2.85 | 1.25E-03 |
| ERCB      | 8564            | KMO      | -2.82 | 5.47E-05 |

|      |        |           |       |          |
|------|--------|-----------|-------|----------|
| ERCB | 1950   | EGF       | -2.77 | 2.21E-03 |
| ERCB | 1551   | CYP3A7    | -2.75 | 2.55E-05 |
| ERCB | 3816   | KLK1      | -2.74 | 4.20E-02 |
| ERCB | 1610   | DAO       | -2.72 | 2.42E-05 |
| ERCB | 1515   | CTSV      | -2.70 | 3.74E-05 |
| ERCB | 5106   | PCK2      | -2.70 | 2.74E-05 |
| ERCB | 1586   | CYP17A1   | -2.69 | 8.40E-03 |
| ERCB | 345    | APOC3     | -2.67 | 1.68E-04 |
| ERCB | 8529   | CYP4F2    | -2.63 | 6.58E-03 |
| ERCB | 810    | CALML3    | -2.60 | 3.30E-03 |
| ERCB | 825    | CAPN3     | -2.56 | 5.48E-03 |
| ERCB | 7512   | XPNPEP2   | -2.52 | 4.12E-04 |
| ERCB | 2168   | FABP1     | -2.51 | 2.35E-04 |
| ERCB | 1733   | DIO1      | -2.48 | 8.53E-04 |
| ERCB | 51181  | DCXR      | -2.47 | 1.65E-04 |
| ERCB | 5816   | PVALB     | -2.47 | 1.98E-03 |
| ERCB | 1800   | DPEP1     | -2.44 | 4.27E-03 |
| ERCB | 11181  | TREH      | -2.41 | 2.27E-03 |
| ERCB | 563    | AZGP1     | -2.40 | 1.38E-03 |
| ERCB | 3248   | HPGD      | -2.40 | 1.37E-04 |
| ERCB | 51179  | HAO2      | -2.38 | 7.28E-04 |
| ERCB | 4547   | MTTP      | -2.36 | 2.43E-05 |
| ERCB | 51268  | PIPOX     | -2.35 | 3.53E-05 |
| ERCB | 8309   | ACOX2     | -2.30 | 3.33E-05 |
| ERCB | 2690   | GHR       | -2.26 | 8.46E-05 |
| ERCB | 51471  | NAT8B     | -2.25 | 2.74E-05 |
| ERCB | 138046 | RALYL     | -2.18 | 3.13E-04 |
| ERCB | 1428   | CRYM      | -2.17 | 5.87E-05 |
| ERCB | 8972   | MGAM      | -2.14 | 1.57E-03 |
| ERCB | 6569   | SLC34A1   | -2.14 | 1.12E-04 |
| ERCB | 9970   | NR1I3     | -2.13 | 4.60E-03 |
| ERCB | 3795   | KHK       | -2.13 | 1.09E-05 |
| ERCB | 26007  | TKFC      | -2.13 | 1.12E-04 |
| ERCB | 6555   | SLC10A2   | -2.12 | 4.98E-03 |
| ERCB | 54886  | LPPR1     | -2.12 | 4.04E-04 |
| ERCB | 79153  | GDPD3     | -2.12 | 5.08E-03 |
| ERCB | 8991   | SELENBP1  | -2.12 | 5.53E-05 |
| ERCB | 4311   | MME       | -2.12 | 1.98E-04 |
| ERCB | 10974  | ADIRF     | -2.10 | 7.47E-04 |
| ERCB | 11136  | SLC7A9    | -2.09 | 1.57E-03 |
| ERCB | 140462 | ASB9      | -2.09 | 4.18E-05 |
| ERCB | 10840  | ALDH1L1   | -2.08 | 9.73E-05 |
| ERCB | 6518   | SLC2A5    | -2.08 | 4.58E-04 |
| ERCB | 1644   | DDC       | -2.08 | 5.78E-04 |
| ERCB | 58510  | PRODH2    | -2.07 | 3.84E-04 |
| ERCB | 78989  | COLEC11   | -2.06 | 1.05E-04 |
| ERCB | 29974  | A1CF      | -2.05 | 9.92E-05 |
| ERCB | 2819   | GPD1      | -2.05 | 5.00E-05 |
| ERCB | 2203   | FBP1      | -2.04 | 3.13E-04 |
| ERCB | 9356   | SLC22A6   | -2.04 | 6.39E-04 |
| ERCB | 670    | BPHL      | -2.04 | 2.55E-05 |
| ERCB | 348    | APOE      | -2.03 | 4.05E-04 |
| ERCB | 9727   | RAB11FIP3 | -2.03 | 7.56E-05 |

|      |        |          |       |          |
|------|--------|----------|-------|----------|
| ERCB | 4329   | ALDH6A1  | -2.02 | 5.32E-04 |
| ERCB | 10615  | SPAG5    | -2.02 | 2.42E-05 |
| ERCB | 36     | ACADSB   | -2.01 | 5.79E-05 |
| ERCB | 55937  | APOM     | -2.01 | 5.97E-03 |
| ERCB | 10249  | GLYAT    | -2.01 | 2.60E-04 |
| ERCB | 50486  | G0S2     | -1.99 | 6.72E-03 |
| ERCB | 64849  | SLC13A3  | -1.99 | 1.19E-03 |
| ERCB | 416    | ARSF     | -1.99 | 2.84E-04 |
| ERCB | 51257  | MARCH2   | -1.98 | 4.91E-05 |
| ERCB | 3273   | HRG      | -1.97 | 5.66E-03 |
| ERCB | 6583   | SLC22A4  | -1.97 | 2.57E-04 |
| ERCB | 9429   | ABCG2    | -1.94 | 6.53E-04 |
| ERCB | 1594   | CYP27B1  | -1.94 | 1.87E-02 |
| ERCB | 5184   | PEPD     | -1.93 | 1.10E-05 |
| ERCB | 229    | ALDOB    | -1.93 | 3.33E-05 |
| ERCB | 3434   | IFIT1    | -1.93 | 2.87E-03 |
| ERCB | 4835   | NQO2     | -1.93 | 1.81E-04 |
| ERCB | 10841  | FTCD     | -1.93 | 4.03E-03 |
| ERCB | 57406  | ABHD6    | -1.92 | 4.05E-05 |
| ERCB | 1803   | DPP4     | -1.91 | 2.47E-04 |
| ERCB | 1807   | DPYS     | -1.91 | 4.85E-04 |
| ERCB | 130    | ADH6     | -1.91 | 2.55E-04 |
| ERCB | 54923  | LIME1    | -1.91 | 3.04E-05 |
| ERCB | 55856  | ACOT13   | -1.90 | 3.10E-05 |
| ERCB | 4482   | MSRA     | -1.89 | 1.71E-04 |
| ERCB | 1579   | CYP4A11  | -1.89 | 8.80E-04 |
| ERCB | 8029   | CUBN     | -1.89 | 4.80E-04 |
| ERCB | 155066 | ATP6V0E2 | -1.89 | 1.42E-05 |
| ERCB | 22977  | AKR7A3   | -1.89 | 6.25E-04 |
| ERCB | 1370   | CPN2     | -1.88 | 6.39E-04 |
| ERCB | 53841  | CDHR5    | -1.88 | 9.89E-05 |
| ERCB | 55840  | EAF2     | -1.88 | 3.30E-05 |
| ERCB | 8974   | P4HA2    | -1.87 | 2.30E-04 |
| ERCB | 462    | SERPINC1 | -1.86 | 9.59E-04 |
| ERCB | 6470   | SHMT1    | -1.85 | 1.77E-04 |
| ERCB | 9390   | SLC22A13 | -1.85 | 4.78E-04 |
| ERCB | 80896  | NPL      | -1.84 | 5.03E-03 |
| ERCB | 10864  | SLC22A7  | -1.84 | 4.40E-03 |
| ERCB | 8858   | PROZ     | -1.84 | 2.39E-02 |
| ERCB | 1468   | SLC25A10 | -1.83 | 5.37E-05 |
| ERCB | 159963 | SLC5A12  | -1.83 | 2.32E-03 |
| ERCB | 2053   | EPHX2    | -1.83 | 6.18E-04 |
| ERCB | 54988  | ACSM5    | -1.83 | 1.44E-04 |
| ERCB | 26051  | PPP1R16B | -1.82 | 2.17E-03 |
| ERCB | 30     | ACAA1    | -1.82 | 5.47E-05 |
| ERCB | 5745   | PTH1R    | -1.82 | 1.22E-04 |
| ERCB | 79783  | SUGCT    | -1.82 | 1.12E-04 |
| ERCB | 8824   | CES2     | -1.81 | 2.42E-05 |
| ERCB | 6296   | ACSM3    | -1.81 | 2.65E-03 |
| ERCB | 80339  | PNPLA3   | -1.81 | 2.70E-03 |
| ERCB | 54981  | NMRK1    | -1.81 | 5.00E-05 |
| ERCB | 9990   | SLC12A6  | -1.80 | 4.33E-04 |
| ERCB | 2184   | FAH      | -1.80 | 2.89E-04 |

|      |       |         |       |          |
|------|-------|---------|-------|----------|
| ERCB | 5313  | PKLR    | -1.79 | 1.39E-04 |
| ERCB | 80036 | TRPM3   | -1.79 | 6.04E-04 |
| ERCB | 9353  | SLIT2   | -1.79 | 1.28E-03 |
| ERCB | 10924 | SMPDL3A | -1.79 | 9.60E-04 |
| ERCB | 22982 | DIP2C   | -1.79 | 6.31E-05 |
| ERCB | 1491  | CTH     | -1.79 | 1.17E-04 |
| ERCB | 635   | BHMT    | -1.79 | 3.69E-03 |
| ERCB | 23743 | BHMT2   | -1.78 | 1.39E-04 |
| ERCB | 6456  | SH3GL2  | -1.78 | 4.87E-03 |
| ERCB | 6514  | SLC2A2  | -1.78 | 9.76E-03 |
| ERCB | 10714 | POLD3   | -1.78 | 1.41E-04 |
| ERCB | 249   | ALPL    | -1.77 | 1.44E-04 |
| ERCB | 9365  | KL      | -1.77 | 5.04E-04 |
| ERCB | 3827  | KNG1    | -1.76 | 4.78E-02 |
| ERCB | 28992 | MACROD1 | -1.76 | 4.33E-04 |
| ERCB | 5860  | QDPR    | -1.76 | 8.93E-05 |
| ERCB | 4860  | PNP     | -1.75 | 3.85E-04 |
| ERCB | 957   | ENTPD5  | -1.75 | 4.30E-04 |
| ERCB | 1244  | ABCC2   | -1.75 | 3.85E-04 |
| ERCB | 2329  | FMO4    | -1.74 | 2.07E-02 |
| ERCB | 5827  | PXMP2   | -1.74 | 4.85E-04 |
| ERCB | 6540  | SLC6A13 | -1.74 | 6.25E-04 |
| ERCB | 793   | CALB1   | -1.74 | 3.41E-02 |
| ERCB | 80221 | ACSF2   | -1.74 | 6.38E-04 |
| ERCB | 443   | ASPA    | -1.74 | 2.07E-03 |
| ERCB | 445   | ASS1    | -1.74 | 6.44E-03 |
| ERCB | 54550 | NECAB2  | -1.73 | 8.80E-04 |
| ERCB | 5641  | LGMN    | -1.72 | 2.08E-02 |
| ERCB | 8671  | SLC4A4  | -1.72 | 7.21E-03 |
| ERCB | 26275 | HIBCH   | -1.71 | 2.30E-03 |
| ERCB | 1662  | DDX10   | -1.71 | 2.19E-03 |
| ERCB | 83660 | TLN2    | -1.71 | 2.63E-03 |
| ERCB | 7107  | GPR137B | -1.70 | 2.56E-04 |
| ERCB | 4128  | MAOA    | -1.70 | 1.25E-03 |
| ERCB | 368   | ABCC6   | -1.69 | 3.45E-04 |
| ERCB | 6482  | ST3GAL1 | -1.69 | 1.74E-03 |
| ERCB | 79919 | C2orf54 | -1.69 | 3.10E-02 |
| ERCB | 2710  | GK      | -1.69 | 8.90E-05 |
| ERCB | 9032  | TM4SF5  | -1.69 | 1.12E-04 |
| ERCB | 275   | AMT     | -1.68 | 4.05E-05 |
| ERCB | 3417  | IDH1    | -1.67 | 1.53E-04 |
| ERCB | 9514  | GAL3ST1 | -1.67 | 1.40E-03 |
| ERCB | 2542  | SLC37A4 | -1.67 | 2.65E-04 |
| ERCB | 2160  | F11     | -1.67 | 1.02E-03 |
| ERCB | 5264  | PHYH    | -1.67 | 1.08E-03 |
| ERCB | 2348  | FOLR1   | -1.66 | 1.56E-03 |
| ERCB | 2584  | GALK1   | -1.66 | 1.71E-04 |
| ERCB | 3373  | HYAL1   | -1.66 | 9.75E-05 |
| ERCB | 10858 | CYP46A1 | -1.66 | 1.38E-03 |
| ERCB | 23037 | PDZD2   | -1.66 | 2.67E-02 |
| ERCB | 224   | ALDH3A2 | -1.66 | 4.26E-04 |
| ERCB | 2643  | GCH1    | -1.65 | 1.34E-03 |
| ERCB | 57476 | GRAMD1B | -1.65 | 5.44E-03 |

|      |        |           |       |          |
|------|--------|-----------|-------|----------|
| ERCB | 4137   | MAPT      | -1.65 | 6.42E-04 |
| ERCB | 10276  | NET1      | -1.65 | 5.33E-04 |
| ERCB | 10243  | GPHN      | -1.65 | 5.09E-04 |
| ERCB | 79746  | ECHDC3    | -1.65 | 5.47E-05 |
| ERCB | 9058   | SLC13A2   | -1.65 | 7.65E-04 |
| ERCB | 18     | ABAT      | -1.65 | 1.11E-02 |
| ERCB | 5646   | PRSS3     | -1.65 | 6.97E-03 |
| ERCB | 55256  | ADI1      | -1.64 | 4.22E-03 |
| ERCB | 9700   | ESPL1     | -1.63 | 3.05E-02 |
| ERCB | 64081  | PBLD      | -1.63 | 2.99E-04 |
| ERCB | 79861  | TUBAL3    | -1.63 | 2.10E-03 |
| ERCB | 59307  | SIGIRR    | -1.63 | 5.15E-04 |
| ERCB | 210    | ALAD      | -1.62 | 6.39E-04 |
| ERCB | 8228   | PNPLA4    | -1.62 | 1.21E-03 |
| ERCB | 10693  | CCT6B     | -1.62 | 6.11E-04 |
| ERCB | 4883   | NPR3      | -1.61 | 3.04E-03 |
| ERCB | 8659   | ALDH4A1   | -1.61 | 3.13E-03 |
| ERCB | 54494  | C11orf71  | -1.61 | 4.58E-04 |
| ERCB | 5973   | RENBP     | -1.60 | 4.80E-04 |
| ERCB | 6780   | STAU1     | -1.60 | 8.51E-04 |
| ERCB | 9056   | SLC7A7    | -1.60 | 3.21E-02 |
| ERCB | 3033   | HADH      | -1.60 | 4.58E-04 |
| ERCB | 5164   | PDK2      | -1.59 | 8.93E-05 |
| ERCB | 2639   | GCDH      | -1.59 | 8.04E-03 |
| ERCB | 54762  | GRAMD1C   | -1.59 | 3.25E-03 |
| ERCB | 1184   | CLCN5     | -1.59 | 6.98E-03 |
| ERCB | 1657   | DMXL1     | -1.59 | 1.05E-02 |
| ERCB | 3291   | HSD11B2   | -1.59 | 4.82E-02 |
| ERCB | 7429   | VIL1      | -1.59 | 3.95E-02 |
| ERCB | 1962   | EHHADH    | -1.58 | 1.07E-03 |
| ERCB | 10367  | MICU1     | -1.58 | 7.01E-04 |
| ERCB | 50     | ACO2      | -1.58 | 6.31E-05 |
| ERCB | 25895  | METTTL21B | -1.58 | 6.68E-04 |
| ERCB | 81932  | HDHD3     | -1.58 | 1.78E-04 |
| ERCB | 64577  | ALDH8A1   | -1.57 | 2.08E-03 |
| ERCB | 8802   | SUCLG1    | -1.57 | 3.20E-04 |
| ERCB | 4094   | MAF       | -1.57 | 1.63E-03 |
| ERCB | 5053   | PAH       | -1.57 | 2.90E-03 |
| ERCB | 154661 | RUNDC3B   | -1.57 | 1.26E-03 |
| ERCB | 5833   | PCYT2     | -1.57 | 8.50E-05 |
| ERCB | 378708 | APITD1    | -1.56 | 6.97E-04 |
| ERCB | 2746   | GLUD1     | -1.56 | 2.78E-03 |
| ERCB | 4745   | NELL1     | -1.56 | 4.60E-02 |
| ERCB | 57733  | GBA3      | -1.56 | 4.03E-03 |
| ERCB | 50507  | NOX4      | -1.56 | 2.24E-02 |
| ERCB | 8416   | ANXA9     | -1.56 | 3.51E-03 |
| ERCB | 2525   | FUT3      | -1.56 | 1.53E-02 |
| ERCB | 2528   | FUT6      | -1.56 | 1.65E-04 |
| ERCB | 58488  | PCTP      | -1.56 | 1.45E-03 |
| ERCB | 3029   | HAGH      | -1.55 | 4.33E-04 |
| ERCB | 384    | ARG2      | -1.55 | 4.45E-02 |
| ERCB | 6097   | RORC      | -1.55 | 2.41E-02 |
| ERCB | 1573   | CYP2J2    | -1.55 | 1.56E-03 |

|      |           |          |       |          |
|------|-----------|----------|-------|----------|
| ERCB | 55224     | ETNK2    | -1.55 | 1.94E-02 |
| ERCB | 23136     | EPB41L3  | -1.55 | 5.08E-04 |
| ERCB | 2644      | GCHFR    | -1.55 | 4.45E-04 |
| ERCB | 55005     | RMND1    | -1.55 | 2.29E-03 |
| ERCB | 818       | CAMK2G   | -1.55 | 2.57E-05 |
| ERCB | 2110      | ETFDH    | -1.55 | 6.54E-04 |
| ERCB | 9380      | GRHPR    | -1.55 | 3.85E-04 |
| ERCB | 79763     | ISOC2    | -1.55 | 1.77E-04 |
| ERCB | 48        | ACO1     | -1.54 | 6.35E-04 |
| ERCB | 79154     | DHRS11   | -1.54 | 4.85E-04 |
| ERCB | 23341     | DNAJC16  | -1.54 | 4.31E-04 |
| ERCB | 8528      | DDO      | -1.54 | 9.31E-05 |
| ERCB | 2254      | FGF9     | -1.54 | 1.38E-02 |
| ERCB | 29953     | TRHDE    | -1.54 | 2.25E-02 |
| ERCB | 7070      | THY1     | -1.54 | 3.53E-02 |
| ERCB | 501       | ALDH7A1  | -1.53 | 1.72E-04 |
| ERCB | 10110     | SGK2     | -1.53 | 1.23E-02 |
| ERCB | 51449     | PCYOX1   | -1.53 | 1.72E-03 |
| ERCB | 5590      | PRKCZ    | -1.53 | 7.09E-04 |
| ERCB | 4234      | METTL1   | -1.53 | 1.91E-04 |
| ERCB | 94081     | SFXN1    | -1.53 | 2.76E-03 |
| ERCB | 55867     | SLC22A11 | -1.53 | 3.40E-02 |
| ERCB | 6390      | SDHB     | -1.53 | 4.51E-04 |
| ERCB | 8836      | GGH      | -1.53 | 3.14E-02 |
| ERCB | 526       | ATP6V1B2 | -1.52 | 9.57E-04 |
| ERCB | 51171     | HSD17B14 | -1.52 | 1.05E-03 |
| ERCB | 25864     | ABHD14A  | -1.52 | 3.05E-02 |
| ERCB | 9027      | NAT8     | -1.51 | 1.18E-02 |
| ERCB | 26999     | CYFIP2   | -1.51 | 8.45E-04 |
| ERCB | 10428     | CFDP1    | -1.51 | 3.51E-03 |
| ERCB | 2731      | GLDC     | -1.51 | 6.41E-03 |
| ERCB | 4437      | MSH3     | -1.51 | 6.91E-04 |
| ERCB | 11332     | ACOT7    | -1.51 | 2.11E-02 |
| ERCB | 2940      | GSTA3    | -1.51 | 2.15E-03 |
| ERCB | 55244     | SLC47A1  | -1.51 | 6.87E-03 |
| ERCB | 11082     | ESM1     | -1.50 | 1.28E-02 |
| ERCB | 5274      | SERPINI1 | -1.50 | 2.48E-02 |
| ERCB | 64220     | STRA6    | -1.50 | 6.97E-04 |
| ERCB | 683       | BST1     | -1.50 | 9.85E-03 |
| ERCB | 6821      | SUOX     | -1.50 | 4.85E-04 |
| ERCB | 3399      | ID3      | 1.50  | 1.11E-02 |
| ERCB | 8635      | RNASET2  | 1.50  | 2.35E-03 |
| ERCB | 1026      | CDKN1A   | 1.51  | 1.58E-02 |
| ERCB | 3576      | CXCL8    | 1.51  | 6.81E-03 |
| ERCB | 1836      | SLC26A2  | 1.51  | 1.38E-03 |
| ERCB | 1627      | DBN1     | 1.51  | 9.89E-05 |
| ERCB | 11000     | SLC27A3  | 1.51  | 1.57E-03 |
| ERCB | 23670     | TMEM2    | 1.51  | 3.29E-02 |
| ERCB | 100133941 | CD24     | 1.52  | 1.76E-02 |
| ERCB | 8714      | ABCC3    | 1.52  | 3.34E-02 |
| ERCB | 4267      | CD99     | 1.52  | 8.08E-03 |
| ERCB | 1436      | CSF1R    | 1.52  | 4.34E-02 |
| ERCB | 5332      | PLCB4    | 1.52  | 3.32E-02 |

|      |        |          |      |          |
|------|--------|----------|------|----------|
| ERCB | 1364   | CLDN4    | 1.52 | 3.25E-03 |
| ERCB | 8743   | TNFSF10  | 1.52 | 1.30E-02 |
| ERCB | 55353  | LAPTM4B  | 1.52 | 7.35E-04 |
| ERCB | 858    | CAV2     | 1.53 | 2.69E-02 |
| ERCB | 11010  | GLIPR1   | 1.53 | 3.42E-02 |
| ERCB | 56892  | C8orf4   | 1.53 | 8.32E-03 |
| ERCB | 977    | CD151    | 1.53 | 1.56E-02 |
| ERCB | 1307   | COL16A1  | 1.53 | 1.05E-02 |
| ERCB | 81539  | SLC38A1  | 1.53 | 4.68E-03 |
| ERCB | 706    | TSPO     | 1.53 | 5.15E-04 |
| ERCB | 79668  | PARP8    | 1.54 | 6.85E-04 |
| ERCB | 29760  | BLNK     | 1.54 | 4.83E-02 |
| ERCB | 6181   | RPLP2    | 1.54 | 1.26E-03 |
| ERCB | 51809  | GALNT7   | 1.55 | 2.85E-02 |
| ERCB | 2752   | GLUL     | 1.55 | 9.28E-04 |
| ERCB | 4582   | MUC1     | 1.55 | 1.62E-02 |
| ERCB | 11138  | TBC1D8   | 1.55 | 3.84E-04 |
| ERCB | 9289   | ADGRG1   | 1.55 | 2.67E-03 |
| ERCB | 10312  | TCIRG1   | 1.55 | 4.96E-03 |
| ERCB | 10079  | ATP9A    | 1.55 | 2.95E-02 |
| ERCB | 116372 | LYPD1    | 1.55 | 2.36E-04 |
| ERCB | 7357   | UGCG     | 1.55 | 2.25E-02 |
| ERCB | 8323   | FZD6     | 1.55 | 2.08E-03 |
| ERCB | 6422   | SFRP1    | 1.56 | 5.90E-03 |
| ERCB | 3606   | IL18     | 1.56 | 1.27E-03 |
| ERCB | 196    | AHR      | 1.56 | 4.43E-03 |
| ERCB | 55179  | FAIM     | 1.56 | 1.29E-02 |
| ERCB | 837    | CASP4    | 1.56 | 3.87E-03 |
| ERCB | 9957   | HS3ST1   | 1.56 | 1.58E-04 |
| ERCB | 961    | CD47     | 1.56 | 1.40E-04 |
| ERCB | 1848   | DUSP6    | 1.57 | 5.97E-03 |
| ERCB | 10892  | MALT1    | 1.57 | 4.30E-04 |
| ERCB | 64359  | NXN      | 1.57 | 1.68E-04 |
| ERCB | 2995   | GYPC     | 1.57 | 2.30E-03 |
| ERCB | 5216   | PFN1     | 1.57 | 5.51E-03 |
| ERCB | 8496   | PPFIBP1  | 1.57 | 6.91E-04 |
| ERCB | 54504  | CPVL     | 1.57 | 4.11E-02 |
| ERCB | 7097   | TLR2     | 1.57 | 1.36E-03 |
| ERCB | 231    | AKR1B1   | 1.58 | 2.96E-02 |
| ERCB | 1001   | CDH3     | 1.58 | 1.44E-03 |
| ERCB | 3459   | IFNGR1   | 1.58 | 9.28E-04 |
| ERCB | 6387   | CXCL12   | 1.58 | 4.34E-02 |
| ERCB | 1906   | EDN1     | 1.58 | 5.92E-04 |
| ERCB | 3690   | ITGB3    | 1.58 | 2.95E-04 |
| ERCB | 2591   | GALNT3   | 1.59 | 5.51E-03 |
| ERCB | 5315   | PKM      | 1.59 | 3.06E-03 |
| ERCB | 3397   | ID1      | 1.59 | 5.51E-03 |
| ERCB | 10769  | PLK2     | 1.59 | 1.72E-02 |
| ERCB | 55329  | MNS1     | 1.60 | 4.78E-02 |
| ERCB | 57228  | SMAGP    | 1.60 | 9.60E-04 |
| ERCB | 6035   | RNASE1   | 1.60 | 2.23E-02 |
| ERCB | 10627  | MYL12A   | 1.60 | 6.18E-04 |
| ERCB | 60489  | APOBEC3G | 1.60 | 2.19E-02 |

|      |        |          |      |          |
|------|--------|----------|------|----------|
| ERCB | 5321   | PLA2G4A  | 1.60 | 2.89E-02 |
| ERCB | 1633   | DCK      | 1.61 | 7.21E-03 |
| ERCB | 1192   | CLIC1    | 1.61 | 2.84E-04 |
| ERCB | 3106   | HLA-B    | 1.62 | 1.05E-02 |
| ERCB | 51278  | IER5     | 1.63 | 8.86E-03 |
| ERCB | 9976   | CLEC2B   | 1.63 | 2.81E-02 |
| ERCB | 304    | ANXA2P2  | 1.64 | 8.51E-04 |
| ERCB | 308    | ANXA5    | 1.64 | 6.51E-04 |
| ERCB | 1522   | CTSZ     | 1.64 | 2.54E-03 |
| ERCB | 1513   | CTSK     | 1.64 | 2.44E-03 |
| ERCB | 2239   | GPC4     | 1.65 | 7.01E-04 |
| ERCB | 7351   | UCP2     | 1.66 | 3.84E-02 |
| ERCB | 9450   | LY86     | 1.66 | 1.91E-02 |
| ERCB | 8682   | PEA15    | 1.66 | 1.12E-04 |
| ERCB | 10409  | BASP1    | 1.67 | 4.55E-02 |
| ERCB | 79679  | VTCN1    | 1.67 | 1.81E-02 |
| ERCB | 5873   | RAB27A   | 1.67 | 1.12E-04 |
| ERCB | 2919   | CXCL1    | 1.68 | 1.10E-02 |
| ERCB | 6237   | RRAS     | 1.68 | 7.54E-04 |
| ERCB | 10875  | FGL2     | 1.68 | 3.71E-02 |
| ERCB | 11259  | FILIP1L  | 1.68 | 7.78E-04 |
| ERCB | 9332   | CD163    | 1.68 | 5.93E-03 |
| ERCB | 3134   | HLA-F    | 1.69 | 6.21E-03 |
| ERCB | 79888  | LPCAT1   | 1.69 | 2.76E-03 |
| ERCB | 2950   | GSTP1    | 1.69 | 2.17E-03 |
| ERCB | 5376   | PMP22    | 1.69 | 2.86E-03 |
| ERCB | 55013  | CCDC109B | 1.70 | 3.19E-03 |
| ERCB | 7991   | TUSC3    | 1.70 | 3.43E-03 |
| ERCB | 10092  | ARPC5    | 1.70 | 8.93E-05 |
| ERCB | 1397   | CRIP2    | 1.70 | 1.76E-03 |
| ERCB | 9076   | CLDN1    | 1.71 | 2.07E-03 |
| ERCB | 165    | AEBP1    | 1.71 | 3.86E-02 |
| ERCB | 730    | C7       | 1.71 | 9.77E-03 |
| ERCB | 1277   | COL1A1   | 1.71 | 1.37E-03 |
| ERCB | 2      | A2M      | 1.72 | 7.48E-03 |
| ERCB | 4070   | TACSTD2  | 1.72 | 1.95E-03 |
| ERCB | 4082   | MARCKS   | 1.73 | 1.21E-03 |
| ERCB | 3123   | HLA-DRB1 | 1.74 | 4.22E-02 |
| ERCB | 6999   | TDO2     | 1.75 | 2.69E-02 |
| ERCB | 203068 | TUBB     | 1.75 | 9.75E-05 |
| ERCB | 23344  | ESYT1    | 1.75 | 3.30E-05 |
| ERCB | 9388   | LIPG     | 1.75 | 3.84E-04 |
| ERCB | 4688   | NCF2     | 1.75 | 3.55E-03 |
| ERCB | 1316   | KLF6     | 1.76 | 2.29E-02 |
| ERCB | 8829   | NRP1     | 1.76 | 2.16E-04 |
| ERCB | 9805   | SCRN1    | 1.76 | 1.42E-04 |
| ERCB | 240    | ALOX5    | 1.77 | 1.19E-03 |
| ERCB | 3109   | HLA-DMB  | 1.77 | 1.29E-02 |
| ERCB | 11031  | RAB31    | 1.77 | 4.43E-03 |
| ERCB | 8531   | YBX3     | 1.77 | 3.22E-04 |
| ERCB | 3880   | KRT19    | 1.77 | 2.65E-02 |
| ERCB | 6284   | S100A13  | 1.78 | 1.68E-03 |
| ERCB | 220    | ALDH1A3  | 1.78 | 2.57E-04 |



|      |           |              |      |          |
|------|-----------|--------------|------|----------|
| ERCB | 4886      | NPY1R        | 1.78 | 4.06E-02 |
| ERCB | 1675      | CFD          | 1.79 | 1.95E-04 |
| ERCB | 2273      | FHL1         | 1.79 | 6.45E-03 |
| ERCB | 9535      | GMFG         | 1.79 | 1.10E-02 |
| ERCB | 1536      | CYBB         | 1.80 | 1.38E-02 |
| ERCB | 81618     | ITM2C        | 1.80 | 6.21E-04 |
| ERCB | 8519      | IFITM1       | 1.80 | 1.98E-02 |
| ERCB | 330       | BIRC3        | 1.80 | 2.39E-02 |
| ERCB | 5359      | PLSCR1       | 1.80 | 3.61E-04 |
| ERCB | 85236     | HIST1H2BK    | 1.81 | 4.91E-04 |
| ERCB | 10797     | MTHFD2       | 1.81 | 6.92E-03 |
| ERCB | 9124      | PDLIM1       | 1.81 | 3.84E-04 |
| ERCB | 51330     | TNFRSF12A    | 1.81 | 2.08E-03 |
| ERCB | 10376     | TUBA1B       | 1.81 | 3.25E-03 |
| ERCB | 23231     | SEL1L3       | 1.81 | 5.67E-03 |
| ERCB | 3936      | LCP1         | 1.82 | 1.28E-02 |
| ERCB | 1999      | ELF3         | 1.82 | 3.20E-04 |
| ERCB | 960       | CD44         | 1.82 | 6.39E-04 |
| ERCB | 5696      | PSMB8        | 1.82 | 3.74E-03 |
| ERCB | 51155     | HN1          | 1.83 | 4.33E-04 |
| ERCB | 914       | CD2          | 1.84 | 1.89E-02 |
| ERCB | 51338     | MS4A4A       | 1.84 | 1.78E-04 |
| ERCB | 3075      | CFH          | 1.84 | 1.16E-02 |
| ERCB | 29940     | DSE          | 1.84 | 4.80E-04 |
| ERCB | 5880      | RAC2         | 1.84 | 2.33E-02 |
| ERCB | 7940      | LST1         | 1.85 | 6.60E-03 |
| ERCB | 4050      | LTB          | 1.85 | 2.58E-02 |
| ERCB | 834       | CASP1        | 1.86 | 8.45E-03 |
| ERCB | 972       | CD74         | 1.87 | 8.12E-03 |
| ERCB | 2697      | GJA1         | 1.87 | 2.90E-02 |
| ERCB | 5788      | PTPRC        | 1.87 | 1.05E-02 |
| ERCB | 3091      | HIF1A        | 1.87 | 2.55E-05 |
| ERCB | 2014      | EMP3         | 1.88 | 2.86E-03 |
| ERCB | 54997     | TESC         | 1.88 | 2.89E-04 |
| ERCB | 6280      | S100A9       | 1.89 | 8.31E-03 |
| ERCB | 1545      | CYP1B1       | 1.90 | 4.12E-03 |
| ERCB | 9180      | OSMR         | 1.90 | 2.55E-05 |
| ERCB | 83716     | CRISPLD2     | 1.90 | 4.24E-04 |
| ERCB | 26136     | TES          | 1.90 | 8.93E-05 |
| ERCB | 5698      | PSMB9        | 1.91 | 3.99E-03 |
| ERCB | 6648      | SOD2         | 1.91 | 3.51E-03 |
| ERCB | 3108      | HLA-DMA      | 1.92 | 1.54E-02 |
| ERCB | 55843     | ARHGAP15     | 1.93 | 7.94E-03 |
| ERCB | 25816     | TNFAIP8      | 1.93 | 8.53E-04 |
| ERCB | 1365      | CLDN3        | 1.93 | 1.20E-04 |
| ERCB | 5209      | PFKFB3       | 1.93 | 3.42E-02 |
| ERCB | 6659      | SOX4         | 1.93 | 1.74E-04 |
| ERCB | 65108     | MARCKSL1     | 1.93 | 7.83E-05 |
| ERCB | 2213      | FCGR2B       | 1.94 | 1.50E-02 |
| ERCB | 100505650 | LOC100505650 | 1.94 | 2.55E-02 |
| ERCB | 2012      | EMP1         | 1.95 | 7.09E-04 |
| ERCB | 7533      | YWHAH        | 1.95 | 1.38E-04 |
| ERCB | 6678      | SPARC        | 1.95 | 6.39E-04 |

|      |       |          |      |          |
|------|-------|----------|------|----------|
| ERCB | 27075 | TSPAN13  | 1.96 | 4.31E-04 |
| ERCB | 6281  | S100A10  | 1.97 | 3.45E-04 |
| ERCB | 4016  | LOXL1    | 1.97 | 1.42E-02 |
| ERCB | 3685  | ITGAV    | 1.97 | 1.84E-04 |
| ERCB | 2532  | ACKR1    | 1.98 | 3.74E-03 |
| ERCB | 5997  | RGS2     | 1.98 | 4.77E-04 |
| ERCB | 10551 | AGR2     | 1.98 | 3.57E-02 |
| ERCB | 10457 | GPNMB    | 1.99 | 1.60E-03 |
| ERCB | 3428  | IFI16    | 2.00 | 6.85E-04 |
| ERCB | 2207  | FCER1G   | 2.00 | 5.30E-03 |
| ERCB | 2634  | GBP2     | 2.01 | 5.56E-04 |
| ERCB | 3001  | GZMA     | 2.01 | 2.88E-02 |
| ERCB | 3491  | CYR61    | 2.05 | 1.05E-02 |
| ERCB | 10346 | TRIM22   | 2.06 | 2.54E-03 |
| ERCB | 1359  | CPA3     | 2.07 | 1.93E-02 |
| ERCB | 23531 | MMD      | 2.07 | 4.21E-04 |
| ERCB | 390   | RND3     | 2.08 | 1.42E-04 |
| ERCB | 6001  | RGS10    | 2.09 | 1.72E-03 |
| ERCB | 1439  | CSF2RB   | 2.10 | 5.97E-03 |
| ERCB | 7852  | CXCR4    | 2.10 | 2.56E-03 |
| ERCB | 51316 | PLAC8    | 2.11 | 4.27E-02 |
| ERCB | 713   | C1QB     | 2.12 | 1.76E-02 |
| ERCB | 8870  | IER3     | 2.13 | 1.34E-03 |
| ERCB | 1525  | CXADR    | 2.14 | 4.91E-04 |
| ERCB | 3956  | LGALS1   | 2.14 | 5.51E-03 |
| ERCB | 5699  | PSMB10   | 2.14 | 1.44E-04 |
| ERCB | 3689  | ITGB2    | 2.15 | 6.82E-03 |
| ERCB | 29108 | PYCARD   | 2.16 | 6.78E-04 |
| ERCB | 64231 | MS4A6A   | 2.16 | 6.25E-04 |
| ERCB | 1284  | COL4A2   | 2.16 | 4.50E-04 |
| ERCB | 84617 | TUBB6    | 2.17 | 1.22E-04 |
| ERCB | 397   | ARHGDIB  | 2.17 | 1.57E-03 |
| ERCB | 306   | ANXA3    | 2.18 | 3.81E-04 |
| ERCB | 7837  | PXDN     | 2.18 | 1.10E-04 |
| ERCB | 7168  | TPM1     | 2.19 | 1.42E-05 |
| ERCB | 7412  | VCAM1    | 2.20 | 6.27E-03 |
| ERCB | 3575  | IL7R     | 2.20 | 7.46E-03 |
| ERCB | 6277  | S100A6   | 2.20 | 9.31E-05 |
| ERCB | 11326 | VSIG4    | 2.21 | 2.47E-04 |
| ERCB | 10581 | IFITM2   | 2.22 | 1.71E-04 |
| ERCB | 2274  | FHL2     | 2.22 | 5.56E-04 |
| ERCB | 963   | CD53     | 2.23 | 6.82E-03 |
| ERCB | 3113  | HLA-DPA1 | 2.23 | 1.82E-02 |
| ERCB | 712   | C1QA     | 2.23 | 4.97E-03 |
| ERCB | 1634  | DCN      | 2.24 | 1.85E-03 |
| ERCB | 51816 | CECR1    | 2.25 | 1.83E-03 |
| ERCB | 1051  | CEBPB    | 2.25 | 1.80E-04 |
| ERCB | 10095 | ARPC1B   | 2.26 | 1.65E-04 |
| ERCB | 51192 | CKLF     | 2.26 | 8.06E-04 |
| ERCB | 1004  | CDH6     | 2.28 | 6.85E-05 |
| ERCB | 1520  | CTSS     | 2.28 | 7.90E-04 |
| ERCB | 7162  | TPBG     | 2.28 | 2.33E-05 |
| ERCB | 3820  | KLRB1    | 2.30 | 8.18E-03 |

|      |       |          |      |          |
|------|-------|----------|------|----------|
| ERCB | 4256  | MGP      | 2.30 | 2.30E-03 |
| ERCB | 3122  | HLA-DRA  | 2.31 | 2.65E-03 |
| ERCB | 26509 | MYOF     | 2.32 | 2.42E-05 |
| ERCB | 5355  | PLP2     | 2.32 | 3.41E-05 |
| ERCB | 25797 | QPCT     | 2.34 | 2.65E-03 |
| ERCB | 10186 | LHFP     | 2.36 | 6.39E-04 |
| ERCB | 6662  | SOX9     | 2.36 | 1.81E-04 |
| ERCB | 6863  | TAC1     | 2.38 | 2.51E-02 |
| ERCB | 1306  | COL15A1  | 2.38 | 2.42E-05 |
| ERCB | 5552  | SRGN     | 2.39 | 1.21E-03 |
| ERCB | 2205  | FCER1A   | 2.39 | 2.08E-02 |
| ERCB | 6273  | S100A2   | 2.40 | 5.30E-03 |
| ERCB | 6039  | RNASE6   | 2.40 | 2.02E-03 |
| ERCB | 3489  | IGFBP6   | 2.41 | 1.23E-04 |
| ERCB | 1282  | COL4A1   | 2.41 | 5.47E-05 |
| ERCB | 3059  | HCLS1    | 2.41 | 1.17E-03 |
| ERCB | 715   | C1R      | 2.42 | 1.64E-03 |
| ERCB | 10123 | ARL4C    | 2.42 | 5.15E-04 |
| ERCB | 4360  | MRC1     | 2.42 | 4.05E-04 |
| ERCB | 629   | CFB      | 2.43 | 3.95E-03 |
| ERCB | 3394  | IRF8     | 2.43 | 7.49E-04 |
| ERCB | 6282  | S100A11  | 2.43 | 5.09E-05 |
| ERCB | 87    | ACTN1    | 2.44 | 2.82E-04 |
| ERCB | 710   | SERPING1 | 2.46 | 6.65E-05 |
| ERCB | 4609  | MYC      | 2.47 | 2.13E-05 |
| ERCB | 3119  | HLA-DQB1 | 2.48 | 1.14E-02 |
| ERCB | 23643 | LY96     | 2.48 | 5.66E-03 |
| ERCB | 241   | ALOX5AP  | 2.50 | 1.42E-04 |
| ERCB | 7305  | TYROBP   | 2.50 | 2.27E-03 |
| ERCB | 6275  | S100A4   | 2.51 | 4.85E-04 |
| ERCB | 7045  | TGFBI    | 2.52 | 9.90E-04 |
| ERCB | 11167 | FSTL1    | 2.52 | 2.42E-05 |
| ERCB | 1475  | CSTA     | 2.53 | 5.90E-03 |
| ERCB | 26002 | MOXD1    | 2.54 | 7.03E-04 |
| ERCB | 7980  | TFPI2    | 2.55 | 4.80E-04 |
| ERCB | 2123  | EVI2A    | 2.58 | 1.85E-03 |
| ERCB | 6347  | CCL2     | 2.59 | 3.43E-04 |
| ERCB | 9168  | TMSB10   | 2.61 | 6.32E-05 |
| ERCB | 10417 | SPON2    | 2.67 | 5.15E-04 |
| ERCB | 3115  | HLA-DPB1 | 2.70 | 1.08E-03 |
| ERCB | 9510  | ADAMTS1  | 2.74 | 2.55E-05 |
| ERCB | 716   | C1S      | 2.80 | 1.71E-04 |
| ERCB | 5918  | RARRES1  | 2.80 | 1.17E-03 |
| ERCB | 3934  | LCN2     | 2.89 | 1.71E-04 |
| ERCB | 7846  | TUBA1A   | 2.89 | 8.46E-05 |
| ERCB | 7431  | VIM      | 2.93 | 8.68E-05 |
| ERCB | 7058  | THBS2    | 2.94 | 3.61E-04 |
| ERCB | 3371  | TNC      | 2.95 | 1.72E-04 |
| ERCB | 301   | ANXA1    | 2.95 | 1.12E-04 |
| ERCB | 302   | ANXA2    | 2.99 | 4.05E-05 |
| ERCB | 84525 | HOPX     | 3.00 | 6.54E-04 |
| ERCB | 64102 | TNMD     | 3.01 | 5.23E-04 |
| ERCB | 4060  | LUM      | 3.02 | 4.80E-04 |

|      |       |          |       |          |
|------|-------|----------|-------|----------|
| ERCB | 1293  | COL6A3   | 3.12  | 2.40E-03 |
| ERCB | 1043  | CD52     | 3.12  | 1.78E-03 |
| ERCB | 962   | CD48     | 3.28  | 1.38E-03 |
| ERCB | 10631 | POSTN    | 3.33  | 1.55E-03 |
| ERCB | 1278  | COL1A2   | 3.34  | 1.65E-04 |
| ERCB | 7805  | LAPTM5   | 3.36  | 1.38E-04 |
| ERCB | 9590  | AKAP12   | 3.42  | 2.74E-05 |
| ERCB | 91353 | IGLL3P   | 3.45  | 3.97E-02 |
| ERCB | 6590  | SLPI     | 3.63  | 3.44E-05 |
| ERCB | 5967  | REG1A    | 3.71  | 5.68E-03 |
| ERCB | 718   | C3       | 3.75  | 2.22E-03 |
| ERCB | 91316 | GUSBP11  | 3.76  | 6.72E-03 |
| ERCB | 6279  | S100A8   | 3.98  | 2.17E-03 |
| ERCB | 1462  | VCAN     | 4.06  | 1.22E-04 |
| ERCB | 10562 | OLFM4    | 4.12  | 5.64E-03 |
| ERCB | 3694  | ITGB6    | 4.27  | 1.09E-05 |
| ERCB | 10406 | WFDC2    | 4.31  | 8.65E-05 |
| ERCB | 7076  | TIMP1    | 4.40  | 6.85E-05 |
| ERCB | 12    | SERPINA3 | 4.40  | 9.77E-05 |
| ERCB | 3512  | JCHAIN   | 4.45  | 2.07E-03 |
| ERCB | 1281  | COL3A1   | 4.54  | 1.65E-04 |
| ERCB | 4316  | MMP7     | 5.58  | 1.42E-04 |
| ERCB | 8842  | PROM1    | 5.58  | 5.00E-05 |
| ERCB | 4069  | LYZ      | 5.91  | 1.84E-04 |
| ERCB | 6372  | CXCL6    | 6.16  | 2.11E-03 |
| ERCB | 3514  | IGKC     | 6.26  | 6.39E-04 |
| ERCB | 4837  | NNMT     | 8.04  | 9.39E-06 |
| ERCB | 4057  | LTF      | 10.97 | 1.12E-04 |

**Supplementary Table S1b. Predicted Upstream Regulators based on DEG profiles of patients in cluster 3 relative to clusters 1 and 2.** Biological upstream regulators from the differential expression profile in each cohort were extracted from Ingenuity Pathways Analysis and ranked according to enrichment p-value for each upstream regulator in a given cohort. Upstream regulators were aggregated and the average rank and activation score was calculated. The top 15 regulators by average rank are shown.

| <b>Upstream Regulator</b> | <b>Molecule Type</b>    | <b>Average Rank</b> | <b>Average Activation Z-score</b> |
|---------------------------|-------------------------|---------------------|-----------------------------------|
| TNF                       | cytokine                | 1.3                 | 11.03                             |
| IFNG                      | cytokine                | 2.0                 | 9.58                              |
| TGFB1                     | growth factor           | 4.3                 | 7.33                              |
| IL6                       | cytokine                | 4.7                 | 6.49                              |
| IL1B                      | cytokine                | 6.7                 | 8.84                              |
| STAT3                     | transcription regulator | 11.7                | 5.55                              |
| SMARCA4                   | transcription regulator | 12.7                | 6.75                              |
| KRAS                      | enzyme                  | 14.7                | -1.50                             |
| Immunoglobulin            | complex                 | 15.0                | -0.80                             |
| IL4                       | cytokine                | 15.3                | 3.68                              |
| OSM                       | cytokine                | 16.0                | 7.07                              |
| NFkB (complex)            | complex                 | 17.7                | 8.42                              |
| STAT1                     | transcription regulator | 18.0                | 6.71                              |
| ERBB2                     | kinase                  | 21.0                | 4.26                              |
| TP53                      | transcription regulator | 22.0                | 3.92                              |

**Supplementary Table S2. Genes and gene products activated by TNF used to generate the TNF activation score.**

| Gene   | PMID     | Gene    | PMID     | Gene    | PMID     | Gene    | PMID     | Gene    | PMID     | Gene     | PMID     | Gene      | PMID     |
|--------|----------|---------|----------|---------|----------|---------|----------|---------|----------|----------|----------|-----------|----------|
| CCL17  | 12354417 | CHUK    | 11796489 | EMCN    | 11594763 | ICAM1   | 15963988 | ITGB2   | 12454401 | OLR1     | 11985903 | SYTL1     | 12137562 |
| CCL19  | 10679062 | COX2    | 10501211 | ENG     | 17389265 | ICOSLG  | 10744980 | JUN     | 17500068 | OPTN     | 10807909 | TAP1      | 1385520  |
| CCL2   | 9825772  | CPNE1   | 14674885 | EPCAM   | 10867614 | IER3    | 11244505 | JUNB    | 10903323 | ORM1     | 9726030  | TFRC      | 9135559  |
| CCL20  | 11133838 | CR1     | 2961377  | ESAM    | 15505101 | IGFBP1  | 10070049 | KIT     | 10206577 | OSM      | 12097485 | TGFB1     | 15574511 |
| CCL22  | 11923841 | CRH     | 12676571 | ETS1    | 11229456 | IGFBP3  | 11971816 | KITLG   | 15579452 | PAPP4    | 16269458 | THBS1     | 11157717 |
| CCL27  | 11821900 | CRHR2   | 17412781 | F3      | 11058594 | IGFBP6  | 12054123 | LAMP3   | 15963988 | PECAMI   | 7686548  | TMP1      | 15663564 |
| CCL3   | 12115625 | CRP     | 9726030  | FABP2   | 11329616 | IKKBK   | 11796489 | LEP     | 12032749 | PLA2G4A  | 10930295 | TIMP2     | 15663564 |
| CCL4   | 9570566  | CSF1    | 3494061  | FABP4   | 12927809 | IL10    | 12414777 | LIF     | 8895217  | PLAT     | 12692009 | TLR2      | 11160251 |
| CCL5   | 9277410  | CSF2    | 12562880 | FANCG   | 11181053 | IL11    | 10467228 | MADCAM1 | 15483224 | PLAU     | 8601416  | TLR4      | 11160251 |
| CCND1  | 12444159 | CSF3    | 1700731  | FAS     | 8168998  | IL12B   | 10513808 | MAP2K6  | 9029150  | PLAUR    | 8601416  | TNF       | 16365392 |
| CCR1   | 9787141  | CTSG    | 11722574 | FASLG   | 10358159 | IL13RA2 | 14652008 | MAP3K14 | 11368442 | PLD1     | 11485559 | TNFAIP3   | 12388275 |
| CCR3   | 11884459 | CX3CL1  | 11525637 | FCER2   | 7643018  | IL15RA  | 12165497 | MAP4K4  | 16461467 | POSTN    | 15378733 | TNFRSF11B | 11685652 |
| CCR4   | 9787141  | CXADR   | 12571626 | FGF2    | 10629075 | IL1A    | 7686496  | MEFV    | 10807793 | PRTN3    | 11415941 | TNFRSF1A  | 11923841 |
| CCR5   | 9787141  | CXCL1   | 12744776 | FGF7    | 7936642  | IL1B    | 7994029  | MIFEP   | 1372592  | PTGES    | 11029586 | TNFRSF1B  | 12067756 |
| CCR7   | 15963988 | CXCL10  | 11884459 | FOS     | 3259871  | IL1R1   | 8120407  | MMP1    | 12060661 | PTGS2    | 12576525 | TNFRSF21  | 11753679 |
| CCRL2  | 15188357 | CXCL11  | 12627325 | GADD45B | 12388275 | IL1RN   | 8331299  | MMP10   | 8349617  | PTHLH    | 10854575 | TNFRSF8   | 12414777 |
| CD14   | 1373513  | CXCL2   | 10502561 | GDF15   | 9886240  | IL2     | 12414777 | MMP12   | 17525194 | PTPRF    | 10905491 | TNFSF10   | 12218071 |
| CD1A   | 11238627 | CXCL3   | 9277410  | GFAP    | 10674496 | IL21R   | 11986233 | MMP13   | 12878172 | PTX3     | 9521058  | TNFSF11   | 15479886 |
| CD4    | 1921451  | CXCL5   | 9277410  | GJA1    | 12827213 | IL2RA   | 12414777 | MMP14   | 9212749  | RB1      | 15611081 | TNFSF15   | 11911831 |
| CD40   | 11488834 | CXCL6   | 12744776 | GNAI3   | 12214898 | IL3RA   | 1825289  | MMP17   | 12962706 | RELA     | 9756499  | TNIP2     | 15378733 |
| CD55   | 10477692 | CXCL8   | 9209275  | GPNMB   | 19320736 | IL6     | 10467228 | MMP2    | 25358651 | RPS6KA5  | 9873047  | TP53      | 10213465 |
| CD58   | 1354203  | CXCL9   | 12627325 | GRIA1   | 12460558 | IL6R    | 11923841 | MMP3    | 10967046 | S100A11  | 16339570 | TRAF1     | 11978013 |
| CD70   | 9067541  | CXCR4   | 11160334 | GSS     | 15378733 | IL7     | 10961889 | MMP7    | 9461124  | SAA1     | 1714101  | TRAF2     | 12067756 |
| CD80   | 9824486  | CYCS    | 12149248 | HBEGF   | 12138120 | IL7R    | 10779425 | MMP9    | 25358651 | SELE     | 8695814  | TRAF3     | 12067756 |
| CD83   | 15963988 | CYLD    | 18245814 | HCK     | 12237848 | INHBA   | 1417851  | MUC1    | 10867614 | SELL     | 12517920 | TRAF4     | 12067756 |
| CD86   | 12230943 | CYP19A1 | 12452446 | HGF     | 9397161  | IRF1    | 12713595 | MUC5AC  | 12690113 | SELP     | 10484438 | TRAF5     | 12067756 |
| CDK3   | 15378733 | DDR1    | 11606478 | HIF1A   | 12808024 | ITGA1   | 12606473 | MYC     | 10200535 | SERPINA3 | 9461605  | TRAF6     | 12067756 |
| CDK4   | 15611081 | DEFB4A  | 11702237 | HLA-A   | 1354203  | ITGA4   | 12759453 | MYLK    | 15681825 | SERPINB2 | 8824249  | TRPC1     | 12855710 |
| CDKN1A | 12795334 | DUSP10  | 24707477 | HLA-B   | 3455781  | ITGA5   | 8006453  | NAMPT   | 11241162 | SERPINE1 | 11402043 | TXN       | 10555039 |
| CEBPA  | 10211885 | E2F1    | 15611081 | HLA-C   | 1354203  | ITGA6   | 8006453  | NFKB1   | 9756499  | SLC11A2  | 16224057 | TYMP      | 14573775 |
| CFB    | 7512988  | EDN1    | 10764953 | HMOX1   | 10330231 | ITGAL   | 10198263 | NFKB2   | 9529131  | SLC3A2   | 2318252  | VCAM1     | 10484438 |
| CFH    | 1690734  | EFNA1   | 11278471 | HP      | 9097927  | ITGAM   | 12747235 | NFKBIA  | 12580918 | SLC7A2   | 11742806 | WNT5A     | 12165812 |
| CFLAR  | 12861043 | EGFR    | 10077640 | HPSE    | 16384929 | ITGAX   | 1921451  | NLRP3   | 14662828 | SMAD7    | 10652273 | XIAP      | 16219905 |
| CHRM2  | 15671275 | EGR1    | 1370482  | HSP90B1 | 15378733 | ITGB1   | 9565575  | NOS2    | 10601128 | SOD2     | 9114748  | ZFP36     | 10763822 |

**Supplementary Table S3. Clinical characteristics of North American Nephrotic Syndrome Study Network (NEPTUNE) participants with biopsies used for single-nucleus RNA-seq.**

|                     | TNF High (N = 5) | TNF Low (N = 5)   |
|---------------------|------------------|-------------------|
| Age mean (sd)       | 44.6 (22.6)      | 20.8 (17.4)       |
| Sex (male:female)   | 2:3              | 3:2               |
| eGFR mean (sd)      | 44.26 (22.47)    | 115.53 (44.01)    |
| UPCR median (IQR)   | 5.05 (3.62, 5.8) | 0.96 (0.86, 1.03) |
| FSGS                | 4                | 4                 |
| Cluster 3           | 5                | 0                 |
| TNF Score mean (sd) | 0.13 (0.02)      | 0.081 (0.01)      |
